# Supplementary material for: Inhibition of Histone H3K27 Demethylases Inactivates Brachyury (TBXT) and Promotes Chordoma Cell Death
Source: Oxford University Press journal article supplement (doi:10.1158/0008-5472.can-20-1387), 2020-08-27
Supplement: 00085472can201387-sup-242008_2_supp_6494234_q9ymt9.xlsx [file 00085472can201387-sup-242008_2_supp_6494234_q9ymt9.xlsx]

## Sheet: Sheet1
query	significant	p_value	term_size	query_size	intersection_size	precision	recall	term_id	source	term_name	intersection
query_1	TRUE	2.62e-30	401	2975	88	0.0295798	0.219451	REAC:R-HSA-112316	REAC	Neuronal System	DLGAP3,KCNA2,KCNA3,KCNJ10,KCNJ9,KCNH1,CACNB2,GAD2,CHAT,SLC18A3,SLC18A2,KCNQ1,ABCC8,KCNA4,SLC1A2,SYT7,NRXN2,HTR3B,HTR3A,GRIK4,NRGN,KCNA1,KCNA5,KCNJ8,SYT10,KCNH3,GLS2,KCNK10,BEGAIN,GABRA5,GABRB3,GABRG3,CHRNA7,HCN4,CHRNA3,RASGRF1,PRKCB,SLC6A4,KCNH4,CACNG4,GRIN2C,HCN2,GRIN3B,GNG7,PTPRS,KCNN1,KCNA7,SLC17A7,KCNC3,LRRC4B,SHANK1,PRKCG,CACNG8,KCNF1,KCNS3,NRXN1,GAD1,CHRND,PLCB1,DLGAP4,SLC32A1,CHRNA4,KCNQ2,…
query_1	TRUE	4.02e-25	395	2975	80	0.0268908	0.202532	REAC:R-HSA-381753	REAC	Olfactory Signaling Pathway	OR2B11,OR2T10,OR2T11,OR51D1,OR51E1,OR51F1,OR51E2,OR51S1,OR51A2,OR52J3,OR52E2,OR51V1,OR51Q1,OR51I1,OR51I2,OR52N5,OR52B2,OR5P3,OR4C3,OR8I2,OR8H1,OR8K3,OR5AP2,OR9I1,OR6X1,OR8D4,OR10G6,OR10G4,OR10G9,OR10G8,OR10G7,OR8B4,OR8B8,OR8A1,OR10AD1,OR8S1,OR10A7,OR6C74,OR6C6,OR6C1,OR6C3,OR6C75,OR6C65,OR6C2,OR6C76,OR6C68,OR4L1,OR11G2,OR10G2,OR4E2,OR4E1,OR2C1,OR4D1,OR4D2,REEP6,OR1M1,OR7G2,OR7G1,OR7G3,OR1I1,OR10H5…
query_1	TRUE	9.57e-21	460	2975	80	0.0268908	0.173913	REAC:R-HSA-500792	REAC	GPCR ligand binding	WNT4,OPRD1,S1PR1,PROK1,ADORA1,CD55,NPY4R,NPFFR1,HTR7,FFAR4,WNT8B,ADRA2A,PRLHR,APLNR,WNT11,DRD2,WNT1,DHH,FZD10,OXGR1,SSTR1,PTGDR,CCL11,CCL13,CCL1,CCR7,HCRT,RAMP2,SSTR2,GALR2,GCGR,UTS2R,KISS1R,GNG7,FFAR1,FFAR3,FFAR2,GPR4,PTH2,UCN,PROKR1,TACR1,NMS,CXCR4,GCG,FZD7,WNT6,WNT10A,IHH,SSTR4,GNAS,EDN3,HRH3,NTSR1,NPBWR2,WNT7B,WNT7A,CCK,GRM2,PROK2,TRH,GHSR,ADRA2C,F2RL2,F2R,HRH2,GABBR1,GRM4,GLP1R,CGA,CNR1,NPY,…
query_1	TRUE	4.43e-14	99	2975	30	0.010084	0.30303	REAC:R-HSA-1296071	REAC	Potassium Channels	KCNA2,KCNA3,KCNJ10,KCNJ9,KCNH1,KCNQ1,ABCC8,KCNA4,KCNA1,KCNA5,KCNJ8,KCNH3,KCNK10,HCN4,KCNH4,HCN2,GNG7,KCNN1,KCNA7,KCNC3,KCNF1,KCNS3,KCNQ2,KCNMB1,GABBR1,KCNK17,KCNK16,KCNH2,KCNQ3,GABBR2
query_1	TRUE	5.84e-14	260	2975	49	0.0164706	0.188462	REAC:R-HSA-112315	REAC	Transmission across Chemical Synapses	KCNJ10,KCNJ9,CACNB2,GAD2,CHAT,SLC18A3,SLC18A2,SLC1A2,HTR3B,HTR3A,GRIK4,NRGN,GLS2,GABRA5,GABRB3,GABRG3,CHRNA7,CHRNA3,RASGRF1,PRKCB,SLC6A4,CACNG4,GRIN2C,GRIN3B,GNG7,SLC17A7,PRKCG,CACNG8,GAD1,CHRND,PLCB1,SLC32A1,CHRNA4,SYN3,CACNG2,SLC6A11,SLC6A1,SYN2,CPLX1,SLC6A3,GABBR1,SLC22A1,ACHE,GABBR2,CACNA1B,RPS6KA6,GRIA3,GABRA3,GABRQ
query_1	TRUE	7.16e-13	328	2975	54	0.0181513	0.164634	REAC:R-HSA-373076	REAC	Class A/1 (Rhodopsin-like receptors)	OPRD1,S1PR1,PROK1,ADORA1,NPY4R,NPFFR1,HTR7,FFAR4,ADRA2A,PRLHR,APLNR,DRD2,OXGR1,SSTR1,PTGDR,CCL11,CCL13,CCL1,CCR7,HCRT,SSTR2,GALR2,UTS2R,KISS1R,FFAR1,FFAR3,FFAR2,GPR4,PROKR1,TACR1,NMS,CXCR4,SSTR4,EDN3,HRH3,NTSR1,NPBWR2,CCK,PROK2,TRH,GHSR,ADRA2C,F2RL2,F2R,HRH2,CGA,CNR1,NPY,TAC1,CHRM2,ADRB3,NPBWR1,PENK,HTR2C
query_1	TRUE	6.68e-11	181	2975	36	0.0121008	0.198895	REAC:R-HSA-198933	REAC	Immunoregulatory interactions between a Lymphoid and a non-Lymphoid cell	CD1D,CRTAM,PIANP,KLRB1,TRAV8-4,IGHV3-7,IGHV3-23,IGHV4-34,IGHV4-39,IGHV1-69,IGHV2-70,COLEC12,ICAM1,ICAM5,CD22,SIGLEC11,SIGLEC7,SIGLEC6,LILRB5,LILRB2,LILRA5,LILRA4,LAIR1,LAIR2,LILRA2,LILRA1,LILRB4,KIR3DL1,KIR2DL4,NCR1,IGKV4-1,IGKV5-2,IGKV1-5,IGLV1-40,NCR2,ULBP1
query_1	TRUE	1.94e-10	207	2975	38	0.0127731	0.183575	REAC:R-HSA-397014	REAC	Muscle contraction	NPPA,NPR1,ACTA1,RYR2,CACNB2,KCNQ1,PAK1,SCN3B,SCN8A,MYH6,KCNK10,RYR3,MYH11,TRIM72,ATP2A3,MYH3,CACNG4,CACNG1,ATP1A3,SLC8A2,CACNG7,CACNG8,CACNG6,NPPC,CACNG2,ITPR1,ATP2B2,SCN10A,NKX2-5,KCNK17,KCNK16,PLN,KCNH2,GATA4,TMOD1,DMD,FGF13,ATP2B3
query_1	TRUE	5.29e-10	139	2975	30	0.010084	0.215827	REAC:R-HSA-5576891	REAC	Cardiac conduction	NPPA,NPR1,RYR2,CACNB2,KCNQ1,SCN3B,SCN8A,KCNK10,RYR3,ATP2A3,CACNG4,CACNG1,ATP1A3,SLC8A2,CACNG7,CACNG8,CACNG6,NPPC,CACNG2,ITPR1,ATP2B2,SCN10A,NKX2-5,KCNK17,KCNK16,PLN,KCNH2,GATA4,FGF13,ATP2B3
query_1	TRUE	6.54e-09	43	2975	16	0.00537815	0.372093	REAC:R-HSA-1296072	REAC	Voltage gated Potassium channels	KCNA2,KCNA3,KCNH1,KCNQ1,KCNA4,KCNA1,KCNA5,KCNH3,KCNH4,KCNA7,KCNC3,KCNF1,KCNS3,KCNQ2,KCNH2,KCNQ3
query_1	TRUE	9.12e-09	215	2975	36	0.0121008	0.167442	REAC:R-HSA-6805567	REAC	Keratinization	TCHH,KRT75,KRT4,KRT24,KRT27,KRT28,KRT10,KRT12,KRT20,KRT25,KRT26,KRTAP9-2,KRTAP9-3,KRTAP9-8,KRTAP9-4,KRTAP9-9,KRTAP9-6,KRTAP9-7,KRTAP29-1,KRTAP16-1,KRTAP17-1,KLK5,KLK8,KLK12,KLK13,KLK14,KRTAP10-7,KRTAP10-8,KRTAP10-9,KRTAP10-10,KRTAP10-11,KRTAP12-4,KRTAP12-3,KRTAP12-2,KRTAP12-1,KRTAP10-12
query_1	TRUE	9.12e-09	195	2975	34	0.0114286	0.174359	REAC:R-HSA-375276	REAC	Peptide ligand-binding receptors	OPRD1,PROK1,NPY4R,NPFFR1,PRLHR,APLNR,SSTR1,CCL11,CCL13,CCL1,CCR7,HCRT,SSTR2,GALR2,UTS2R,KISS1R,PROKR1,TACR1,NMS,CXCR4,SSTR4,EDN3,NTSR1,NPBWR2,CCK,PROK2,TRH,GHSR,F2RL2,F2R,NPY,TAC1,NPBWR1,PENK
query_1	TRUE	3.9e-08	93	2975	22	0.00739496	0.236559	REAC:R-HSA-373080	REAC	Class B/2 (Secretin family receptors)	WNT4,CD55,WNT8B,WNT11,WNT1,DHH,FZD10,RAMP2,GCGR,GNG7,PTH2,UCN,GCG,FZD7,WNT6,WNT10A,IHH,GNAS,WNT7B,WNT7A,GLP1R,CALCR
query_1	TRUE	1.32e-07	39	2975	14	0.00470588	0.358974	REAC:R-HSA-186712	REAC	Regulation of beta-cell development	PTF1A,NEUROG3,PAX6,PDX1,ONECUT1,HNF1B,ONECUT3,FOXA3,NEUROD1,INSM1,NKX2-2,FOXA2,MAFA,MAMLD1
query_1	TRUE	1.78e-07	298	2975	41	0.0137815	0.137584	REAC:R-HSA-1474244	REAC	Extracellular matrix organization	BCAN,NID1,ITGA8,TLL2,ADAMTS8,JAM3,MFAP5,A2M,MMP17,COL4A1,COL4A2,CMA1,LTBP2,FBN1,MMP25,MMP2,VTN,LAMA1,PTPRS,COL5A3,ICAM1,ICAM5,COMP,NCAN,CEACAM6,KLK7,KLK2,PXDN,NRXN1,COL4A4,COL4A3,MMP24,EMILIN3,BMP7,ADAMTS9,VCAN,COL23A1,SCUBE3,COL12A1,PDGFA,DMD
query_1	TRUE	2.97e-07	213	2975	33	0.0110924	0.15493	REAC:R-HSA-416476	REAC	G alpha (q) signalling events	PROK1,PRKCQ,NPFFR1,FFAR4,ARHGEF25,HCRT,GCGR,UTS2R,KISS1R,GNG7,FFAR1,FFAR3,FFAR2,GPR4,PROKR1,TACR1,NMS,GCG,PLCB1,EDN3,NTSR1,ITPR1,CCK,PROK2,TRH,GHSR,F2RL2,F2R,RGS17,TAC1,DGKI,DGKK,HTR2C
query_1	TRUE	5.03e-07	50	2975	15	0.00504202	0.3	REAC:R-HSA-112310	REAC	Neurotransmitter release cycle	GAD2,CHAT,SLC18A3,SLC18A2,SLC1A2,GLS2,SLC17A7,GAD1,SLC32A1,SYN3,SLC6A11,SLC6A1,SYN2,CPLX1,SLC22A1
query_1	TRUE	2.28e-06	455	2975	51	0.0171429	0.112088	REAC:R-HSA-9006934	REAC	Signaling by Receptor Tyrosine Kinases	VAV3,MAPKAPK2,NRG3,IGF2,BDNF,FGF4,PAK1,GAB2,FGF23,FGF6,NTF3,IGF1,FGF9,WASF3,FLT3,COL4A1,COL4A2,ARHGEF7,CMA1,GABRB3,GABRG3,IGF1R,PRKCB,LAMA1,RIT2,SHC2,PTPRS,COL5A3,CDC37,ATP6V1C2,COL4A4,COL4A3,ELMO2,TIAM1,ITPR1,DOCK3,LRIG1,FGFRL1,PDGFRA,FYN,ADAP1,GRB10,BRAF,NOS3,FGF20,SH3GL2,PCSK5,NTRK2,PTPN3,VAV2,GABRQ
query_1	TRUE	5.58e-06	196	2975	29	0.0097479	0.147959	REAC:R-HSA-112314	REAC	Neurotransmitter receptors and postsynaptic signal transmission	KCNJ10,KCNJ9,HTR3B,HTR3A,GRIK4,NRGN,GABRA5,GABRB3,GABRG3,CHRNA7,CHRNA3,RASGRF1,PRKCB,CACNG4,GRIN2C,GRIN3B,GNG7,PRKCG,CACNG8,CHRND,PLCB1,CHRNA4,CACNG2,GABBR1,GABBR2,RPS6KA6,GRIA3,GABRA3,GABRQ
query_1	TRUE	5.75e-05	140	2975	22	0.00739496	0.157143	REAC:R-HSA-1474228	REAC	Degradation of the extracellular matrix	BCAN,NID1,TLL2,ADAMTS8,A2M,MMP17,COL4A1,COL4A2,CMA1,FBN1,MMP25,MMP2,COL5A3,KLK7,KLK2,COL4A4,COL4A3,MMP24,ADAMTS9,COL23A1,SCUBE3,COL12A1
query_1	TRUE	5.75e-05	89	2975	17	0.00571429	0.191011	REAC:R-HSA-2980736	REAC	Peptide hormone metabolism	FFAR4,PAX6,KIF5A,IGF1,CDX2,CMA1,MYO5A,SEC11C,FFAR1,UCN,INHBB,GCG,PCSK1,CGA,ACHE,GATA4,ACE2
query_1	TRUE	6.37e-05	6	2975	5	0.00168067	0.833333	REAC:R-HSA-211916	REAC	Vitamins	CYP26C1,CYP26A1,CYP27B1,CYP26B1,CYP24A1
query_1	TRUE	6.37e-05	401	2975	43	0.0144538	0.107232	REAC:R-HSA-418594	REAC	G alpha (i) signalling events	OPRD1,S1PR1,ADORA1,PRKCQ,NPY4R,ADRA2A,PNLIP,APLNR,OXGR1,SSTR1,RGS6,CCL13,CCL1,CCR7,SSTR2,GALR2,GNG7,RDH8,PDE4A,PRKCG,PPP3R1,NMS,CXCR4,PLCB1,SSTR4,GNAS,HRH3,NPBWR2,ITPR1,GRM2,GUCA1C,RBP2,ADRA2C,GABBR1,GRM4,CNR1,RGS17,NPY,CHRM2,NPBWR1,PENK,GABBR2,GPC4
query_1	TRUE	9.28e-05	83	2975	16	0.00537815	0.192771	REAC:R-HSA-2871809	REAC	FCERI mediated Ca+2 mobilization	VAV3,MS4A2,IGHV3-7,IGHV3-23,IGHV4-34,IGHV4-39,IGHV1-69,IGHV2-70,PPP3R1,IGKV4-1,IGKV5-2,IGKV1-5,IGLV1-40,ITPR1,LCP2,VAV2
query_1	TRUE	0.000125018	85	2975	16	0.00537815	0.188235	REAC:R-HSA-983695	REAC	Antigen activates B Cell Receptor (BCR) leading to generation of second messengers	PIK3CD,IGHM,IGHV3-7,IGHV3-23,IGHV4-34,IGHV4-39,IGHV1-69,IGHV2-70,CD22,IGKV4-1,IGKV5-2,IGKV1-5,IGLV1-40,ITPR1,FYN,BLK
query_1	TRUE	0.000141264	42	2975	11	0.00369748	0.261905	REAC:R-HSA-419037	REAC	NCAM1 interactions	CACNB2,COL4A1,COL4A2,CACNA1G,NRTN,COL5A3,NCAN,COL4A4,COL4A3,GFRA4,GFRA2
query_1	TRUE	0.000141264	86	2975	16	0.00537815	0.186047	REAC:R-HSA-6794362	REAC	Protein-protein interactions at synapses	DLGAP3,SYT7,NRXN2,SYT10,BEGAIN,GRIN2C,PTPRS,LRRC4B,SHANK1,NRXN1,DLGAP4,DLGAP2,NLGN4X,IL1RAPL2,GRIA3,SLITRK2
query_1	TRUE	0.000180693	7	2975	5	0.00168067	0.714286	REAC:R-HSA-210747	REAC	Regulation of gene expression in early pancreatic precursor cells	PTF1A,PDX1,ONECUT1,HNF1B,ONECUT3
query_1	TRUE	0.000213813	44	2975	11	0.00369748	0.25	REAC:R-HSA-5576892	REAC	Phase 0 - rapid depolarisation	CACNB2,SCN3B,SCN8A,CACNG4,CACNG1,CACNG7,CACNG8,CACNG6,CACNG2,SCN10A,FGF13
query_1	TRUE	0.000263761	23	2975	8	0.00268908	0.347826	REAC:R-HSA-400508	REAC	Incretin synthesis, secretion, and inactivation	FFAR4,PAX6,CDX2,SEC11C,FFAR1,GCG,PCSK1,GATA4
query_1	TRUE	0.000315124	124	2975	19	0.00638656	0.153226	REAC:R-HSA-381426	REAC	Regulation of Insulin-like Growth Factor (IGF) transport and uptake by Insulin-like Growth Factor Binding Proteins (IGFBPs)	PCSK9,ITIH2,IGF2,RCN1,FGF23,IGF1,FBN1,MMP2,NOTUM,KLK1,KLK3,KLK13,KLK2,PDIA6,SCG2,VCAN,VGF,PENK,AMELX
query_1	TRUE	0.00034233	83	2975	15	0.00504202	0.180723	REAC:R-HSA-2871796	REAC	FCERI mediated MAPK activation	VAV3,MS4A2,PAK1,IGHV3-7,IGHV3-23,IGHV4-34,IGHV4-39,IGHV1-69,IGHV2-70,IGKV4-1,IGKV5-2,IGKV1-5,IGLV1-40,LCP2,VAV2
query_1	TRUE	0.000400591	8	2975	5	0.00168067	0.625	REAC:R-HSA-1839122	REAC	Signaling by activated point mutants of FGFR1	FGF4,FGF23,FGF6,FGF9,FGF20
query_1	TRUE	0.000400591	8	2975	5	0.00168067	0.625	REAC:R-HSA-190373	REAC	FGFR1c ligand binding and activation	FGF4,FGF23,FGF6,FGF9,FGF20
query_1	TRUE	0.000423759	248	2975	29	0.0097479	0.116935	REAC:R-HSA-425407	REAC	SLC-mediated transmembrane transport	SLC30A2,SLC18A2,SLC6A5,SLC1A2,SLCO1B3,SLC15A1,SLC24A4,SLC12A6,SLC6A2,SLC13A2,SLC39A3,SLC7A10,SLC8A2,SLC17A7,SLC4A10,SLC24A3,SLC32A1,SLC2A10,SLC5A4,SLC6A11,SLC6A1,SLC15A2,SLC9A3,SLC6A3,RHAG,SLC35A1,SLC22A1,SLC22A3,SLC26A4
query_1	TRUE	0.000484141	140	2975	20	0.00672269	0.142857	REAC:R-HSA-2029480	REAC	Fcgamma receptor (FCGR) dependent phagocytosis	VAV3,PAK1,WASF3,IGHV3-7,IGHV3-23,IGHV4-34,IGHV4-39,IGHV1-69,IGHV2-70,MYO5A,MYH2,IGKV4-1,IGKV5-2,IGKV1-5,HCK,ELMO2,IGLV1-40,ITPR1,FYN,VAV2
query_1	TRUE	0.000512483	19	2975	7	0.00235294	0.368421	REAC:R-HSA-210745	REAC	Regulation of gene expression in beta cells	PAX6,PDX1,FOXA3,NEUROD1,NKX2-2,FOXA2,MAFA
query_1	TRUE	0.000512483	19	2975	7	0.00235294	0.368421	REAC:R-HSA-442660	REAC	Na+/Cl- dependent neurotransmitter transporters	SLC18A2,SLC6A5,SLC6A2,SLC6A11,SLC6A1,SLC6A3,SLC22A1
query_1	TRUE	0.000512483	49	2975	11	0.00369748	0.22449	REAC:R-HSA-373752	REAC	Netrin-1 signaling	PRKCQ,UNC5B,SLIT1,PAK1,AGAP2,NEO1,NTN1,DCC,ROBO1,UNC5A,TRPC5
query_1	TRUE	0.000512483	97	2975	16	0.00537815	0.164948	REAC:R-HSA-2173782	REAC	Binding and Uptake of Ligands by Scavenger Receptors	CD163,COL4A1,COL4A2,IGHV3-7,IGHV3-23,IGHV4-34,IGHV4-39,IGHV1-69,IGHV2-70,HP,HPR,COLEC12,IGKV4-1,IGKV5-2,IGKV1-5,IGLV1-40
query_1	TRUE	0.000580585	26	2975	8	0.00268908	0.307692	REAC:R-HSA-3238698	REAC	WNT ligand biogenesis and trafficking	WNT4,WNT8B,WNT11,WNT1,WNT6,WNT10A,WNT7B,WNT7A
query_1	TRUE	0.000601266	59	2975	12	0.00403361	0.20339	REAC:R-HSA-375165	REAC	NCAM signaling for neurite out-growth	CACNB2,COL4A1,COL4A2,CACNA1G,NRTN,COL5A3,NCAN,COL4A4,COL4A3,GFRA4,FYN,GFRA2
query_1	TRUE	0.000627137	69	2975	13	0.00436975	0.188406	REAC:R-HSA-2730905	REAC	Role of LAT2/NTAL/LAB on calcium mobilization	MS4A2,GAB2,IGHV3-7,IGHV3-23,IGHV4-34,IGHV4-39,IGHV1-69,IGHV2-70,IGKV4-1,IGKV5-2,IGKV1-5,IGLV1-40,FYN
query_1	TRUE	0.000627137	69	2975	13	0.00436975	0.188406	REAC:R-HSA-2168880	REAC	Scavenging of heme from plasma	CD163,IGHV3-7,IGHV3-23,IGHV4-34,IGHV4-39,IGHV1-69,IGHV2-70,HP,HPR,IGKV4-1,IGKV5-2,IGKV1-5,IGLV1-40
query_1	TRUE	0.000627137	5	2975	4	0.00134454	0.8	REAC:R-HSA-210746	REAC	Regulation of gene expression in endocrine-committed (NEUROG3+) progenitor cells	NEUROG3,NEUROD1,INSM1,NKX2-2
query_1	TRUE	0.000627137	5	2975	4	0.00134454	0.8	REAC:R-HSA-444209	REAC	Free fatty acid receptors	FFAR4,FFAR1,FFAR3,FFAR2
query_1	TRUE	0.000648495	20	2975	7	0.00235294	0.35	REAC:R-HSA-381771	REAC	Synthesis, secretion, and inactivation of Glucagon-like Peptide-1 (GLP-1)	FFAR4,PAX6,CDX2,SEC11C,FFAR1,GCG,PCSK1
query_1	TRUE	0.000648495	9	2975	5	0.00168067	0.555556	REAC:R-HSA-190375	REAC	FGFR2c ligand binding and activation	FGF4,FGF23,FGF6,FGF9,FGF20
query_1	TRUE	0.000648495	9	2975	5	0.00168067	0.555556	REAC:R-HSA-428542	REAC	Regulation of commissural axon pathfinding by SLIT and ROBO	SLIT1,NELL2,NTN1,DCC,ROBO1
query_1	TRUE	0.000673036	27	2975	8	0.00268908	0.296296	REAC:R-HSA-5576893	REAC	Phase 2 - plateau phase	CACNB2,KCNQ1,CACNG4,CACNG1,CACNG7,CACNG8,CACNG6,CACNG2
query_1	TRUE	0.000703401	43	2975	10	0.00336134	0.232558	REAC:R-HSA-2428924	REAC	IGF1R signaling cascade	IGF2,FGF4,GAB2,FGF23,FGF6,IGF1,FGF9,FLT3,IGF1R,FGF20
query_1	TRUE	0.000703401	43	2975	10	0.00336134	0.232558	REAC:R-HSA-2428928	REAC	IRS-related events triggered by IGF1R	IGF2,FGF4,GAB2,FGF23,FGF6,IGF1,FGF9,FLT3,IGF1R,FGF20
query_1	TRUE	0.000707452	61	2975	12	0.00403361	0.196721	REAC:R-HSA-5690714	REAC	CD22 mediated BCR regulation	IGHM,IGHV3-7,IGHV3-23,IGHV4-34,IGHV4-39,IGHV1-69,IGHV2-70,CD22,IGKV4-1,IGKV5-2,IGKV1-5,IGLV1-40
query_1	TRUE	0.000837915	44	2975	10	0.00336134	0.227273	REAC:R-HSA-2404192	REAC	Signaling by Type 1 Insulin-like Growth Factor 1 Receptor (IGF1R)	IGF2,FGF4,GAB2,FGF23,FGF6,IGF1,FGF9,FLT3,IGF1R,FGF20
query_1	TRUE	0.000837915	21	2975	7	0.00235294	0.333333	REAC:R-HSA-392154	REAC	Nitric oxide stimulates guanylate cyclase	PDE2A,NOS2,PDE9A,ITPR1,KCNMB1,PDE10A,NOS3
query_1	TRUE	0.00101318	116	2975	17	0.00571429	0.146552	REAC:R-HSA-2029482	REAC	Regulation of actin dynamics for phagocytic cup formation	VAV3,PAK1,WASF3,IGHV3-7,IGHV3-23,IGHV4-34,IGHV4-39,IGHV1-69,IGHV2-70,MYO5A,MYH2,IGKV4-1,IGKV5-2,IGKV1-5,ELMO2,IGLV1-40,VAV2
query_1	TRUE	0.00108199	10	2975	5	0.00168067	0.5	REAC:R-HSA-1462054	REAC	Alpha-defensins	DEFA4,DEFA6,DEFA1B,DEFA3,DEFA5
query_1	TRUE	0.00108199	64	2975	12	0.00403361	0.1875	REAC:R-HSA-373755	REAC	Semaphorin interactions	DPYSL4,PAK1,RND1,PLXNC1,SEMA7A,MYH11,MYH10,MYH14,DPYSL5,CRMP1,SEMA6A,FYN
query_1	TRUE	0.00115896	55	2975	11	0.00369748	0.2	REAC:R-HSA-1638091	REAC	Heparan sulfate/heparin (HS-GAG) metabolism	BCAN,HPSE2,B3GAT1,HS6ST3,HS3ST6,HS3ST2,HS3ST3B1,NCAN,VCAN,HS3ST5,GPC4
query_1	TRUE	0.00117417	85	2975	14	0.00470588	0.164706	REAC:R-HSA-418346	REAC	Platelet homeostasis	PDE2A,P2RX2,ATP2A3,NOS2,GNG7,SLC8A2,GNAS,PDE9A,ITPR1,ATP2B2,KCNMB1,PDE10A,NOS3,ATP2B3
query_1	TRUE	0.00121408	75	2975	13	0.00436975	0.173333	REAC:R-HSA-3000178	REAC	ECM proteoglycans	BCAN,ITGA8,COL4A1,COL4A2,VTN,LAMA1,PTPRS,COL5A3,COMP,NCAN,COL4A4,COL4A3,VCAN
query_1	TRUE	0.00132197	56	2975	11	0.00369748	0.196429	REAC:R-HSA-6794361	REAC	Neurexins and neuroligins	DLGAP3,SYT7,NRXN2,SYT10,BEGAIN,GRIN2C,SHANK1,NRXN1,DLGAP4,DLGAP2,NLGN4X
query_1	TRUE	0.00160385	67	2975	12	0.00403361	0.179104	REAC:R-HSA-2029481	REAC	FCGR activation	IGHV3-7,IGHV3-23,IGHV4-34,IGHV4-39,IGHV1-69,IGHV2-70,IGKV4-1,IGKV5-2,IGKV1-5,HCK,IGLV1-40,FYN
query_1	TRUE	0.00172434	78	2975	13	0.00436975	0.166667	REAC:R-HSA-422356	REAC	Regulation of insulin secretion	CACNB2,ADRA2A,ABCC8,GNG7,FFAR1,SYT5,KCNS3,GCG,PLCB1,GNAS,ITPR1,ADRA2C,GLP1R
query_1	TRUE	0.00172434	11	2975	5	0.00168067	0.454545	REAC:R-HSA-5654219	REAC	Phospholipase C-mediated cascade: FGFR1	FGF4,FGF23,FGF6,FGF9,FGF20
query_1	TRUE	0.00172434	11	2975	5	0.00168067	0.454545	REAC:R-HSA-190242	REAC	FGFR1 ligand binding and activation	FGF4,FGF23,FGF6,FGF9,FGF20
query_1	TRUE	0.00194422	112	2975	16	0.00537815	0.142857	REAC:R-HSA-166658	REAC	Complement cascade	C1QA,CD55,CR2,CR1,IGHV3-7,IGHV3-23,IGHV4-34,IGHV4-39,IGHV1-69,IGHV2-70,VTN,IGKV4-1,IGKV5-2,IGKV1-5,IGLV1-40,FCN2
query_1	TRUE	0.00199165	90	2975	14	0.00470588	0.155556	REAC:R-HSA-2682334	REAC	EPH-Ephrin signaling	EPHA8,VAV3,PAK1,ARHGEF7,MYH11,MMP2,EFNB3,MYH10,MYH14,TIAM1,EPHB1,EPHA7,FYN,VAV2
query_1	TRUE	0.00199165	69	2975	12	0.00403361	0.173913	REAC:R-HSA-166786	REAC	Creation of C4 and C2 activators	C1QA,IGHV3-7,IGHV3-23,IGHV4-34,IGHV4-39,IGHV1-69,IGHV2-70,IGKV4-1,IGKV5-2,IGKV1-5,IGLV1-40,FCN2
query_1	TRUE	0.00217118	102	2975	15	0.00504202	0.147059	REAC:R-HSA-977606	REAC	Regulation of Complement cascade	C1QA,CD55,CR2,CR1,IGHV3-7,IGHV3-23,IGHV4-34,IGHV4-39,IGHV1-69,IGHV2-70,VTN,IGKV4-1,IGKV5-2,IGKV1-5,IGLV1-40
query_1	TRUE	0.00236693	18	2975	6	0.00201681	0.333333	REAC:R-HSA-422085	REAC	Synthesis, secretion, and deacylation of Ghrelin	IGF1,SEC11C,UCN,GCG,PCSK1,ACHE
query_1	TRUE	0.00236693	18	2975	6	0.00201681	0.333333	REAC:R-HSA-888590	REAC	GABA synthesis, release, reuptake and degradation	GAD2,GAD1,SLC32A1,SLC6A11,SLC6A1,CPLX1
query_1	TRUE	0.00236693	18	2975	6	0.00201681	0.333333	REAC:R-HSA-2243919	REAC	Crosslinking of collagen fibrils	TLL2,COL4A1,COL4A2,PXDN,COL4A4,COL4A3
query_1	TRUE	0.00248264	12	2975	5	0.00168067	0.416667	REAC:R-HSA-5578768	REAC	Physiological factors	NPPA,NPR1,NPPC,NKX2-5,GATA4
query_1	TRUE	0.00248264	12	2975	5	0.00168067	0.416667	REAC:R-HSA-190322	REAC	FGFR4 ligand binding and activation	FGF4,FGF23,FGF6,FGF9,FGF20
query_1	TRUE	0.00248264	42	2975	9	0.00302521	0.214286	REAC:R-HSA-375280	REAC	Amine ligand-binding receptors	HTR7,ADRA2A,DRD2,HRH3,ADRA2C,HRH2,CHRM2,ADRB3,HTR2C
query_1	TRUE	0.00285669	62	2975	11	0.00369748	0.177419	REAC:R-HSA-173623	REAC	Classical antibody-mediated complement activation	C1QA,IGHV3-7,IGHV3-23,IGHV4-34,IGHV4-39,IGHV1-69,IGHV2-70,IGKV4-1,IGKV5-2,IGKV1-5,IGLV1-40
query_1	TRUE	0.00322171	84	2975	13	0.00436975	0.154762	REAC:R-HSA-216083	REAC	Integrin cell surface interactions	ITGA8,JAM3,COL4A1,COL4A2,FBN1,VTN,COL5A3,ICAM1,ICAM5,COMP,COL4A4,COL4A3,COL23A1
query_1	TRUE	0.00358272	13	2975	5	0.00168067	0.384615	REAC:R-HSA-5654688	REAC	SHC-mediated cascade:FGFR1	FGF4,FGF23,FGF6,FGF9,FGF20
query_1	TRUE	0.00358272	13	2975	5	0.00168067	0.384615	REAC:R-HSA-400511	REAC	Synthesis, secretion, and inactivation of Glucose-dependent Insulinotropic Polypeptide (GIP)	PAX6,SEC11C,FFAR1,PCSK1,GATA4
query_1	TRUE	0.00358272	13	2975	5	0.00168067	0.384615	REAC:R-HSA-5654228	REAC	Phospholipase C-mediated cascade; FGFR4	FGF4,FGF23,FGF6,FGF9,FGF20
query_1	TRUE	0.00358272	182	2975	21	0.00705882	0.115385	REAC:R-HSA-983712	REAC	Ion channel transport	RYR2,ANO2,ANO4,RYR3,SCNN1G,SCNN1B,ATP2C2,ATP2A3,BEST2,ATP1A3,ATP6V1C2,ASIC4,TRPM2,ATP2B2,ATP13A5,OSTM1,PLN,ASIC3,TRPA1,TRPC5,ATP2B3
query_1	TRUE	0.00358272	182	2975	21	0.00705882	0.115385	REAC:R-HSA-2454202	REAC	Fc epsilon receptor (FCERI) signaling	VAV3,PRKCQ,MS4A2,PAK1,GAB2,IGHV3-7,IGHV3-23,IGHV4-34,IGHV4-39,IGHV1-69,IGHV2-70,PPP3R1,IGKV4-1,IGKV5-2,IGKV1-5,IGLV1-40,ITPR1,LCP2,FYN,VAV2,TAB3
query_1	TRUE	0.00467416	8	2975	4	0.00134454	0.5	REAC:R-HSA-418886	REAC	Netrin mediated repulsion signals	UNC5B,NTN1,DCC,UNC5A
query_1	TRUE	0.00476775	77	2975	12	0.00403361	0.155844	REAC:R-HSA-166663	REAC	Initial triggering of complement	C1QA,IGHV3-7,IGHV3-23,IGHV4-34,IGHV4-39,IGHV1-69,IGHV2-70,IGKV4-1,IGKV5-2,IGKV1-5,IGLV1-40,FCN2
query_1	TRUE	0.00476775	56	2975	10	0.00336134	0.178571	REAC:R-HSA-977443	REAC	GABA receptor activation	KCNJ10,KCNJ9,GABRA5,GABRB3,GABRG3,GNG7,GABBR1,GABBR2,GABRA3,GABRQ
query_1	TRUE	0.00507771	14	2975	5	0.00168067	0.357143	REAC:R-HSA-2033519	REAC	Activated point mutants of FGFR2	FGF4,FGF23,FGF6,FGF9,FGF20
query_1	TRUE	0.00507771	14	2975	5	0.00168067	0.357143	REAC:R-HSA-5654221	REAC	Phospholipase C-mediated cascade; FGFR2	FGF4,FGF23,FGF6,FGF9,FGF20
query_1	TRUE	0.00512758	327	2975	31	0.0104202	0.0948012	REAC:R-HSA-195721	REAC	Signaling by WNT	WNT4,AGO3,HIST3H3,HIST3H2BB,DKK1,WNT8B,WNT11,WNT1,WIF1,DAAM1,PRKCB,TNRC6C,GNG7,PRKCG,PPP3R1,FZD7,WNT6,WNT10A,PLCB1,WNT7B,ITPR1,WNT7A,SOX2,LEF1,RNF146,SOX7,SFRP1,SOX17,RSPO2,ROR2,SOX3
query_1	TRUE	0.00578937	4	2975	3	0.0010084	0.75	REAC:R-HSA-9032759	REAC	NTRK2 activates RAC1	BDNF,DOCK3,NTRK2
query_1	TRUE	0.00580579	190	2975	21	0.00705882	0.110526	REAC:R-HSA-202733	REAC	Cell surface interactions at the vascular wall	ESAM,JAM3,IGHM,IGHV3-7,IGHV3-23,IGHV4-34,IGHV4-39,IGHV1-69,IGHV2-70,SLC7A10,MAG,CEACAM5,CEACAM3,CEACAM6,IGKV4-1,IGKV5-2,IGKV1-5,THBD,IGLV1-40,FYN,ANGPT2
query_1	TRUE	0.00585343	164	2975	19	0.00638656	0.115854	REAC:R-HSA-983705	REAC	Signaling by the B Cell Receptor (BCR)	PIK3CD,IGHM,IGHV3-7,IGHV3-23,IGHV4-34,IGHV4-39,IGHV1-69,IGHV2-70,PRKCB,CD22,PPP3R1,IGKV4-1,IGKV5-2,IGKV1-5,IGLV1-40,ITPR1,NFKBIE,FYN,BLK
query_1	TRUE	0.00593109	58	2975	10	0.00336134	0.172414	REAC:R-HSA-3000171	REAC	Non-integrin membrane-ECM interactions	COL4A1,COL4A2,VTN,LAMA1,COL5A3,NRXN1,COL4A4,COL4A3,PDGFA,DMD
query_1	TRUE	0.00642507	22	2975	6	0.00201681	0.272727	REAC:R-HSA-452723	REAC	Transcriptional regulation of pluripotent stem cells	LIN28A,FOXD3,SALL1,SOX2,NR5A1,ZIC3
query_1	TRUE	0.00652435	15	2975	5	0.00168067	0.333333	REAC:R-HSA-2214320	REAC	Anchoring fibril formation	TLL2,COL4A1,COL4A2,COL4A4,COL4A3
query_1	TRUE	0.00652435	15	2975	5	0.00168067	0.333333	REAC:R-HSA-418457	REAC	cGMP effects	PDE2A,PDE9A,ITPR1,KCNMB1,PDE10A
query_1	TRUE	0.00652435	128	2975	16	0.00537815	0.125	REAC:R-HSA-6809371	REAC	Formation of the cornified envelope	TCHH,KRT75,KRT4,KRT24,KRT27,KRT28,KRT10,KRT12,KRT20,KRT25,KRT26,KLK5,KLK8,KLK12,KLK13,KLK14
query_1	TRUE	0.00652435	49	2975	9	0.00302521	0.183673	REAC:R-HSA-3928665	REAC	EPH-ephrin mediated repulsion of cells	EPHA8,VAV3,MMP2,EFNB3,TIAM1,EPHB1,EPHA7,FYN,VAV2
query_1	TRUE	0.00652435	15	2975	5	0.00168067	0.333333	REAC:R-HSA-5654719	REAC	SHC-mediated cascade:FGFR4	FGF4,FGF23,FGF6,FGF9,FGF20
query_1	TRUE	0.00652435	15	2975	5	0.00168067	0.333333	REAC:R-HSA-5654689	REAC	PI-3K cascade:FGFR1	FGF4,FGF23,FGF6,FGF9,FGF20
query_1	TRUE	0.00662202	9	2975	4	0.00134454	0.444444	REAC:R-HSA-190239	REAC	FGFR3 ligand binding and activation	FGF4,FGF23,FGF9,FGF20
query_1	TRUE	0.00662202	9	2975	4	0.00134454	0.444444	REAC:R-HSA-2033514	REAC	FGFR3 mutant receptor activation	FGF4,FGF23,FGF9,FGF20
query_1	TRUE	0.00662202	9	2975	4	0.00134454	0.444444	REAC:R-HSA-190372	REAC	FGFR3c ligand binding and activation	FGF4,FGF23,FGF9,FGF20
query_1	TRUE	0.00662202	9	2975	4	0.00134454	0.444444	REAC:R-HSA-5654227	REAC	Phospholipase C-mediated cascade; FGFR3	FGF4,FGF23,FGF9,FGF20
query_1	TRUE	0.00662202	9	2975	4	0.00134454	0.444444	REAC:R-HSA-1839130	REAC	Signaling by activated point mutants of FGFR3	FGF4,FGF23,FGF9,FGF20
query_1	TRUE	0.0067541	93	2975	13	0.00436975	0.139785	REAC:R-HSA-163125	REAC	Post-translational modification: synthesis of GPI-anchored proteins	PIGM,CNTN5,TECTA,OPCML,RTN4RL1,CEACAM7,CEACAM5,LYPD4,LYPD1,PIGT,NRN1,MDGA1,LY6H
query_1	TRUE	0.0068824	31	2975	7	0.00235294	0.225806	REAC:R-HSA-1296065	REAC	Inwardly rectifying K+ channels	KCNJ10,KCNJ9,ABCC8,KCNJ8,GNG7,GABBR1,GABBR2
query_1	TRUE	0.00820725	107	2975	14	0.00470588	0.130841	REAC:R-HSA-163685	REAC	Integration of energy metabolism	CACNB2,ADRA2A,ABCC8,GCGR,GNG7,FFAR1,SYT5,KCNS3,GCG,PLCB1,GNAS,ITPR1,ADRA2C,GLP1R
query_1	TRUE	0.00821188	16	2975	5	0.00168067	0.3125	REAC:R-HSA-190241	REAC	FGFR2 ligand binding and activation	FGF4,FGF23,FGF6,FGF9,FGF20
query_1	TRUE	0.00821188	16	2975	5	0.00168067	0.3125	REAC:R-HSA-5654693	REAC	FRS-mediated FGFR1 signaling	FGF4,FGF23,FGF6,FGF9,FGF20
query_1	TRUE	0.00821188	16	2975	5	0.00168067	0.3125	REAC:R-HSA-210744	REAC	Regulation of gene expression in late stage (branching morphogenesis) pancreatic bud precursor cells	NEUROG3,ONECUT1,HNF1B,ONECUT3,MAMLD1
query_1	TRUE	0.00821188	16	2975	5	0.00168067	0.3125	REAC:R-HSA-5654699	REAC	SHC-mediated cascade:FGFR2	FGF4,FGF23,FGF6,FGF9,FGF20
query_1	TRUE	0.00857964	62	2975	10	0.00336134	0.16129	REAC:R-HSA-2219530	REAC	Constitutive Signaling by Aberrant PI3K in Cancer	PIK3CD,NRG3,FGF4,FGF23,FGF6,FGF9,TRAT1,PDGFRA,FYN,FGF20
query_1	TRUE	0.00976576	10	2975	4	0.00134454	0.4	REAC:R-HSA-209968	REAC	Thyroxine biosynthesis	DIO3,DUOX2,TPO,CGA
query_1	TRUE	0.00976576	10	2975	4	0.00134454	0.4	REAC:R-HSA-112311	REAC	Neurotransmitter clearance	SLC6A4,SLC6A3,SLC22A1,ACHE
query_1	TRUE	0.010055	86	2975	12	0.00403361	0.139535	REAC:R-HSA-425366	REAC	Transport of bile salts and organic acids, metal ions and amine compounds	SLC30A2,SLC18A2,SLC6A5,SLC6A2,SLC13A2,SLC39A3,SLC6A11,SLC6A1,SLC6A3,RHAG,SLC22A1,SLC22A3
query_1	TRUE	0.010055	110	2975	14	0.00470588	0.127273	REAC:R-HSA-6785807	REAC	Interleukin-4 and Interleukin-13 signaling	OPRD1,S1PR1,IL10,GATA3,ALOX5,NDN,MMP2,ALOX15,NOS2,CCL11,ICAM1,SOX2,IRF4,F13A1
query_1	TRUE	0.0105638	17	2975	5	0.00168067	0.294118	REAC:R-HSA-3928664	REAC	Ephrin signaling	PAK1,ARHGEF7,EFNB3,EPHB1,FYN
query_1	TRUE	0.0105638	17	2975	5	0.00168067	0.294118	REAC:R-HSA-5654720	REAC	PI-3K cascade:FGFR4	FGF4,FGF23,FGF6,FGF9,FGF20
query_1	TRUE	0.01115	34	2975	7	0.00235294	0.205882	REAC:R-HSA-202433	REAC	Generation of second messenger molecules	PAK1,TRAV8-4,LCP2,HLA-DRA,HLA-DRB5,HLA-DQA2,HLA-DQB2
query_1	TRUE	0.0113952	54	2975	9	0.00302521	0.166667	REAC:R-HSA-5578775	REAC	Ion homeostasis	RYR2,RYR3,ATP2A3,ATP1A3,SLC8A2,ITPR1,ATP2B2,PLN,ATP2B3
query_1	TRUE	0.0131243	26	2975	6	0.00201681	0.230769	REAC:R-HSA-1839124	REAC	FGFR1 mutant receptor activation	FGF4,GAB2,FGF23,FGF6,FGF9,FGF20
query_1	TRUE	0.0131243	26	2975	6	0.00201681	0.230769	REAC:R-HSA-5654726	REAC	Negative regulation of FGFR1 signaling	FGF4,FGF23,FGF6,FGF9,BRAF,FGF20
query_1	TRUE	0.0132248	18	2975	5	0.00168067	0.277778	REAC:R-HSA-209776	REAC	Metabolism of amine-derived hormones	TPH1,DIO3,DUOX2,TPO,CGA
query_1	TRUE	0.0132248	18	2975	5	0.00168067	0.277778	REAC:R-HSA-5654712	REAC	FRS-mediated FGFR4 signaling	FGF4,FGF23,FGF6,FGF9,FGF20
query_1	TRUE	0.0132248	18	2975	5	0.00168067	0.277778	REAC:R-HSA-5654695	REAC	PI-3K cascade:FGFR2	FGF4,FGF23,FGF6,FGF9,FGF20
query_1	TRUE	0.0132248	45	2975	8	0.00268908	0.177778	REAC:R-HSA-74751	REAC	Insulin receptor signalling cascade	FGF4,GAB2,FGF23,FGF6,FGF9,FLT3,GRB10,FGF20
query_1	TRUE	0.0133711	11	2975	4	0.00134454	0.363636	REAC:R-HSA-5654704	REAC	SHC-mediated cascade:FGFR3	FGF4,FGF23,FGF9,FGF20
query_1	TRUE	0.0148601	36	2975	7	0.00235294	0.194444	REAC:R-HSA-109704	REAC	PI3K Cascade	FGF4,GAB2,FGF23,FGF6,FGF9,FLT3,FGF20
query_1	TRUE	0.0151612	27	2975	6	0.00201681	0.222222	REAC:R-HSA-399721	REAC	Glutamate binding, activation of AMPA receptors and synaptic plasticity	PRKCB,CACNG4,PRKCG,CACNG8,CACNG2,GRIA3
query_1	TRUE	0.0151612	27	2975	6	0.00201681	0.222222	REAC:R-HSA-399719	REAC	Trafficking of AMPA receptors	PRKCB,CACNG4,PRKCG,CACNG8,CACNG2,GRIA3
query_1	TRUE	0.0151612	27	2975	6	0.00201681	0.222222	REAC:R-HSA-5654733	REAC	Negative regulation of FGFR4 signaling	FGF4,FGF23,FGF6,FGF9,BRAF,FGF20
query_1	TRUE	0.0165093	19	2975	5	0.00168067	0.263158	REAC:R-HSA-5654700	REAC	FRS-mediated FGFR2 signaling	FGF4,FGF23,FGF6,FGF9,FGF20
query_1	TRUE	0.0168038	37	2975	7	0.00235294	0.189189	REAC:R-HSA-2129379	REAC	Molecules associated with elastic fibres	ITGA8,MFAP5,LTBP2,FBN1,VTN,EMILIN3,BMP7
query_1	TRUE	0.0168038	105	2975	13	0.00436975	0.12381	REAC:R-HSA-2672351	REAC	Stimuli-sensing channels	RYR2,ANO2,ANO4,RYR3,SCNN1G,SCNN1B,BEST2,ASIC4,TRPM2,OSTM1,ASIC3,TRPA1,TRPC5
query_1	TRUE	0.0168038	105	2975	13	0.00436975	0.12381	REAC:R-HSA-425393	REAC	Transport of inorganic cations/anions and amino acids/oligopeptides	SLC1A2,SLC15A1,SLC24A4,SLC12A6,SLC7A10,SLC8A2,SLC17A7,SLC4A10,SLC24A3,SLC32A1,SLC15A2,SLC9A3,SLC26A4
query_1	TRUE	0.0172825	6	2975	3	0.0010084	0.5	REAC:R-HSA-2428933	REAC	SHC-related events triggered by IGF1R	IGF2,IGF1,IGF1R
query_1	TRUE	0.0172825	12	2975	4	0.00134454	0.333333	REAC:R-HSA-2892247	REAC	POU5F1 (OCT4), SOX2, NANOG activate genes related to proliferation	FOXD3,SALL1,SOX2,ZIC3
query_1	TRUE	0.0172825	28	2975	6	0.00201681	0.214286	REAC:R-HSA-5654727	REAC	Negative regulation of FGFR2 signaling	FGF4,FGF23,FGF6,FGF9,BRAF,FGF20
query_1	TRUE	0.0172825	28	2975	6	0.00201681	0.214286	REAC:R-HSA-418360	REAC	Platelet calcium homeostasis	P2RX2,ATP2A3,SLC8A2,ITPR1,ATP2B2,ATP2B3
query_1	TRUE	0.0172825	81	2975	11	0.00369748	0.135802	REAC:R-HSA-2029485	REAC	Role of phospholipids in phagocytosis	IGHV3-7,IGHV3-23,IGHV4-34,IGHV4-39,IGHV1-69,IGHV2-70,IGKV4-1,IGKV5-2,IGKV1-5,IGLV1-40,ITPR1
query_1	TRUE	0.0172825	12	2975	4	0.00134454	0.333333	REAC:R-HSA-112308	REAC	Presynaptic depolarization and calcium channel opening	CACNB2,CACNG4,CACNG2,CACNA1B
query_1	TRUE	0.0172825	6	2975	3	0.0010084	0.5	REAC:R-HSA-9032500	REAC	Activated NTRK2 signals through FYN	BDNF,DOCK3,NTRK2
query_1	TRUE	0.0172825	6	2975	3	0.0010084	0.5	REAC:R-HSA-9032845	REAC	Activated NTRK2 signals through CDK5	BDNF,TIAM1,NTRK2
query_1	TRUE	0.0172825	28	2975	6	0.00201681	0.214286	REAC:R-HSA-3928663	REAC	EPHA-mediated growth cone collapse	EPHA8,MYH11,MYH10,MYH14,EPHA7,FYN
query_1	TRUE	0.0172825	12	2975	4	0.00134454	0.333333	REAC:R-HSA-418359	REAC	Reduction of cytosolic Ca++ levels	ATP2A3,SLC8A2,ATP2B2,ATP2B3
query_1	TRUE	0.0174259	119	2975	14	0.00470588	0.117647	REAC:R-HSA-373760	REAC	L1CAM interactions	PAK1,SCN3B,SCN8A,LAMA1,NCAN,KCNQ2,CHL1,SCN10A,ANK1,KCNQ3,SH3GL2,VAV2,RPS6KA6,DCX
query_1	TRUE	0.0175407	48	2975	8	0.00268908	0.166667	REAC:R-HSA-418597	REAC	G alpha (z) signalling events	PRKCQ,ADRA2A,PRKCB,GNG7,PRKCG,GNAS,ADRA2C,RGS17
query_1	TRUE	0.0177259	59	2975	9	0.00302521	0.152542	REAC:R-HSA-193648	REAC	NRAGE signals death through JNK	VAV3,ARHGEF7,MCF2L,ABR,AATF,NGFR,ARHGEF4,TIAM1,VAV2
query_1	TRUE	0.0177259	59	2975	9	0.00302521	0.152542	REAC:R-HSA-8986944	REAC	Transcriptional Regulation by MECP2	AGO3,GAD2,BDNF,FOXG1,TNRC6C,GAD1,PVALB,SOX2,DLL1
query_1	TRUE	0.0178235	38	2975	7	0.00235294	0.184211	REAC:R-HSA-8853659	REAC	RET signaling	PIK3CD,RET,GAB2,NRTN,GFRA4,GRB10,GFRA2
query_1	TRUE	0.0182012	2	2975	2	0.000672269	1	REAC:R-HSA-9026286	REAC	Biosynthesis of DPAn-3-derived protectins and resolvins	ALOX5,ALOX15
query_1	TRUE	0.0182012	2	2975	2	0.000672269	1	REAC:R-HSA-373756	REAC	SDK interactions	SDK2,SDK1
query_1	TRUE	0.0182012	2	2975	2	0.000672269	1	REAC:R-HSA-9022927	REAC	MECP2 regulates transcription of genes involved in GABA signaling	GAD2,GAD1
query_1	TRUE	0.0182012	2	2975	2	0.000672269	1	REAC:R-HSA-1299361	REAC	TWIK-related alkaline pH activated K+ channel (TALK)	KCNK17,KCNK16
query_1	TRUE	0.0182012	2	2975	2	0.000672269	1	REAC:R-HSA-9024909	REAC	BDNF activates NTRK2 (TRKB) signaling	BDNF,NTRK2
query_1	TRUE	0.0182012	2	2975	2	0.000672269	1	REAC:R-HSA-9025046	REAC	NTF3 activates NTRK2 (TRKB) signaling	NTF3,NTRK2
query_1	TRUE	0.0182012	20	2975	5	0.00168067	0.25	REAC:R-HSA-202430	REAC	Translocation of ZAP-70 to Immunological synapse	TRAV8-4,HLA-DRA,HLA-DRB5,HLA-DQA2,HLA-DQB2
query_1	TRUE	0.0182012	2	2975	2	0.000672269	1	REAC:R-HSA-888568	REAC	GABA synthesis	GAD2,GAD1
query_1	TRUE	0.0197188	39	2975	7	0.00235294	0.179487	REAC:R-HSA-112399	REAC	IRS-mediated signalling	FGF4,GAB2,FGF23,FGF6,FGF9,FLT3,FGF20
query_1	TRUE	0.0216352	13	2975	4	0.00134454	0.307692	REAC:R-HSA-5654710	REAC	PI-3K cascade:FGFR3	FGF4,FGF23,FGF9,FGF20
query_1	TRUE	0.021669	123	2975	14	0.00470588	0.113821	REAC:R-HSA-1630316	REAC	Glycosaminoglycan metabolism	BCAN,HPSE2,B3GAT1,B3GNT4,HS6ST3,HS3ST6,HS3ST2,HS3ST3B1,NCAN,HAS1,CHPF,VCAN,HS3ST5,GPC4
query_1	TRUE	0.0219125	30	2975	6	0.00201681	0.2	REAC:R-HSA-3000157	REAC	Laminin interactions	NID1,COL4A1,COL4A2,LAMA1,COL4A4,COL4A3
query_1	TRUE	0.0219125	21	2975	5	0.00168067	0.238095	REAC:R-HSA-9006115	REAC	Signaling by NTRK2 (TRKB)	BDNF,NTF3,TIAM1,DOCK3,NTRK2
query_1	TRUE	0.0225872	98	2975	12	0.00403361	0.122449	REAC:R-HSA-166520	REAC	Signaling by NTRKs	MAPKAPK2,BDNF,NTF3,RIT2,SHC2,PTPRS,TIAM1,DOCK3,BRAF,SH3GL2,PCSK5,NTRK2
query_1	TRUE	0.0251378	41	2975	7	0.00235294	0.170732	REAC:R-HSA-5654736	REAC	Signaling by FGFR1	FGF4,FGF23,FGF6,FGF9,FGFRL1,BRAF,FGF20
query_1	TRUE	0.0251378	31	2975	6	0.00201681	0.193548	REAC:R-HSA-445095	REAC	Interaction between L1 and Ankyrins	SCN3B,SCN8A,KCNQ2,SCN10A,ANK1,KCNQ3
query_1	TRUE	0.0251378	31	2975	6	0.00201681	0.193548	REAC:R-HSA-2022928	REAC	HS-GAG biosynthesis	HS6ST3,HS3ST6,HS3ST2,HS3ST3B1,HS3ST5,GPC4
query_1	TRUE	0.0251378	7	2975	3	0.0010084	0.428571	REAC:R-HSA-629587	REAC	Highly sodium permeable acetylcholine nicotinic receptors	CHRNA3,CHRND,CHRNA4
query_1	TRUE	0.0251378	31	2975	6	0.00201681	0.193548	REAC:R-HSA-2122948	REAC	Activated NOTCH1 Transmits Signal to the Nucleus	NEURL1,DTX4,DTX1,DLK1,DLL4,DLL1
query_1	TRUE	0.0251378	41	2975	7	0.00235294	0.170732	REAC:R-HSA-383280	REAC	Nuclear Receptor transcription pathway	ESRRB,NR1H2,NR2F1,NR2E1,RORB,NR5A1,AR
query_1	TRUE	0.0258839	22	2975	5	0.00168067	0.227273	REAC:R-HSA-5365859	REAC	RA biosynthesis pathway	CYP26C1,CYP26A1,CRABP1,RDH13,CYP26B1
query_1	TRUE	0.0258839	22	2975	5	0.00168067	0.227273	REAC:R-HSA-5654716	REAC	Downstream signaling of activated FGFR4	FGF4,FGF23,FGF6,FGF9,FGF20
query_1	TRUE	0.0267844	14	2975	4	0.00134454	0.285714	REAC:R-HSA-622327	REAC	Postsynaptic nicotinic acetylcholine receptors	CHRNA7,CHRNA3,CHRND,CHRNA4
query_1	TRUE	0.0267844	14	2975	4	0.00134454	0.285714	REAC:R-HSA-5654706	REAC	FRS-mediated FGFR3 signaling	FGF4,FGF23,FGF9,FGF20
query_1	TRUE	0.0267844	14	2975	4	0.00134454	0.285714	REAC:R-HSA-181431	REAC	Acetylcholine binding and downstream events	CHRNA7,CHRNA3,CHRND,CHRNA4
query_1	TRUE	0.0285881	32	2975	6	0.00201681	0.1875	REAC:R-HSA-5655302	REAC	Signaling by FGFR1 in disease	FGF4,GAB2,FGF23,FGF6,FGF9,FGF20
query_1	TRUE	0.0285881	89	2975	11	0.00369748	0.123596	REAC:R-HSA-6811558	REAC	PI5P, PP2A and IER3 Regulate PI3K/AKT Signaling	PIK3CD,NRG3,FGF4,FGF23,FGF6,PIP4K2C,FGF9,TRAT1,PDGFRA,FYN,FGF20
query_1	TRUE	0.0293936	65	2975	9	0.00302521	0.138462	REAC:R-HSA-211897	REAC	Cytochrome P450 - arranged by substrate type	CYP2J2,CYP26C1,CYP26A1,CYP2E1,CYP27B1,CYP4F2,CYP2F1,CYP26B1,CYP24A1
query_1	TRUE	0.0301161	23	2975	5	0.00168067	0.217391	REAC:R-HSA-202427	REAC	Phosphorylation of CD3 and TCR zeta chains	TRAV8-4,HLA-DRA,HLA-DRB5,HLA-DQA2,HLA-DQB2
query_1	TRUE	0.0301161	23	2975	5	0.00168067	0.217391	REAC:R-HSA-5654732	REAC	Negative regulation of FGFR3 signaling	FGF4,FGF23,FGF9,BRAF,FGF20
query_1	TRUE	0.0301161	23	2975	5	0.00168067	0.217391	REAC:R-HSA-5654687	REAC	Downstream signaling of activated FGFR1	FGF4,FGF23,FGF6,FGF9,FGF20
query_1	TRUE	0.0301161	23	2975	5	0.00168067	0.217391	REAC:R-HSA-5654696	REAC	Downstream signaling of activated FGFR2	FGF4,FGF23,FGF6,FGF9,FGF20
query_1	TRUE	0.0304082	143	2975	15	0.00504202	0.104895	REAC:R-HSA-3858494	REAC	Beta-catenin independent WNT signaling	WNT4,AGO3,WNT11,WNT1,DAAM1,PRKCB,TNRC6C,GNG7,PRKCG,PPP3R1,FZD7,PLCB1,ITPR1,LEF1,ROR2
query_1	TRUE	0.0321924	33	2975	6	0.00201681	0.181818	REAC:R-HSA-1592389	REAC	Activation of Matrix Metalloproteinases	MMP17,CMA1,MMP25,MMP2,KLK2,MMP24
query_1	TRUE	0.0332183	15	2975	4	0.00134454	0.266667	REAC:R-HSA-3772470	REAC	Negative regulation of TCF-dependent signaling by WNT ligand antagonists	WNT4,DKK1,WIF1,SFRP1
query_1	TRUE	0.0332183	276	2975	24	0.00806723	0.0869565	REAC:R-HSA-5683057	REAC	MAPK family signaling cascades	AGO3,RET,RASGEF1A,NRG3,RAG1,RAG2,FGF4,PAK1,FGF23,FGF6,FGF9,FLT3,RASGRF1,IGF2BP1,TNRC6C,MAPK4,SHC2,NRTN,GFRA4,PDGFRA,FYN,BRAF,FGF20,GFRA2
query_1	TRUE	0.0339488	44	2975	7	0.00235294	0.159091	REAC:R-HSA-8948216	REAC	Collagen chain trimerization	COL4A1,COL4A2,COL5A3,COL4A4,COL4A3,COL23A1,COL12A1
query_1	TRUE	0.0339488	44	2975	7	0.00235294	0.159091	REAC:R-HSA-1566948	REAC	Elastic fibre formation	ITGA8,MFAP5,LTBP2,FBN1,VTN,EMILIN3,BMP7
query_1	TRUE	0.0345644	8	2975	3	0.0010084	0.375	REAC:R-HSA-3595174	REAC	Defective CHST14 causes EDS, musculocontractural type	BCAN,NCAN,VCAN
query_1	TRUE	0.0345644	8	2975	3	0.0010084	0.375	REAC:R-HSA-5362798	REAC	Release of Hh-Np from the secreting cell	DHH,NOTUM,IHH
query_1	TRUE	0.0345644	8	2975	3	0.0010084	0.375	REAC:R-HSA-3595172	REAC	Defective CHST3 causes SEDCJD	BCAN,NCAN,VCAN
query_1	TRUE	0.0345644	8	2975	3	0.0010084	0.375	REAC:R-HSA-3595177	REAC	Defective CHSY1 causes TPBS	BCAN,NCAN,VCAN
query_1	TRUE	0.0345644	24	2975	5	0.00168067	0.208333	REAC:R-HSA-389948	REAC	PD-1 signaling	TRAV8-4,HLA-DRA,HLA-DRB5,HLA-DQA2,HLA-DQB2
query_1	TRUE	0.0393963	107	2975	12	0.00403361	0.11215	REAC:R-HSA-8957275	REAC	Post-translational protein phosphorylation	PCSK9,ITIH2,RCN1,FGF23,FBN1,NOTUM,PDIA6,SCG2,VCAN,VGF,PENK,AMELX
query_1	TRUE	0.0395379	94	2975	11	0.00369748	0.117021	REAC:R-HSA-4420097	REAC	VEGFA-VEGFR2 Pathway	VAV3,MAPKAPK2,PAK1,WASF3,PRKCB,SHC2,ELMO2,ITPR1,FYN,NOS3,VAV2
query_1	TRUE	0.0397539	16	2975	4	0.00134454	0.25	REAC:R-HSA-399956	REAC	CRMPs in Sema3A signaling	DPYSL4,DPYSL5,CRMP1,FYN
query_1	TRUE	0.0397539	69	2975	9	0.00302521	0.130435	REAC:R-HSA-74752	REAC	Signaling by Insulin receptor	FGF4,GAB2,FGF23,FGF6,FGF9,FLT3,ATP6V1C2,GRB10,FGF20
query_1	TRUE	0.0397539	25	2975	5	0.00168067	0.2	REAC:R-HSA-1296041	REAC	Activation of G protein gated Potassium channels	KCNJ10,KCNJ9,GNG7,GABBR1,GABBR2
query_1	TRUE	0.0397539	25	2975	5	0.00168067	0.2	REAC:R-HSA-1296059	REAC	G protein gated Potassium channels	KCNJ10,KCNJ9,GNG7,GABBR1,GABBR2
query_1	TRUE	0.0397539	35	2975	6	0.00201681	0.171429	REAC:R-HSA-5083635	REAC	Defective B3GALTL causes Peters-plus syndrome (PpS)	SPON1,ADAMTS8,THSD1,ADAMTS9,SEMA5B,ADAMTS12
query_1	TRUE	0.0397539	25	2975	5	0.00168067	0.2	REAC:R-HSA-997272	REAC	Inhibition of voltage gated Ca2+ channels via Gbeta/gamma subunits	KCNJ10,KCNJ9,GNG7,GABBR1,GABBR2
query_1	TRUE	0.0397539	35	2975	6	0.00201681	0.171429	REAC:R-HSA-5654743	REAC	Signaling by FGFR4	FGF4,FGF23,FGF6,FGF9,BRAF,FGF20
query_1	TRUE	0.0413783	3	2975	2	0.000672269	0.666667	REAC:R-HSA-9023661	REAC	Biosynthesis of E-series 18(R)-resolvins	ALOX5,ALOX15
query_1	TRUE	0.0413783	3	2975	2	0.000672269	0.666667	REAC:R-HSA-428359	REAC	Insulin-like Growth Factor-2 mRNA Binding Proteins (IGF2BPs/IMPs/VICKZs) bind RNA	IGF2BP1,IGF2BP3
query_1	TRUE	0.0413783	3	2975	2	0.000672269	0.666667	REAC:R-HSA-392023	REAC	Adrenaline signalling through Alpha-2 adrenergic receptor	ADRA2A,ADRA2C
query_1	TRUE	0.043693	96	2975	11	0.00369748	0.114583	REAC:R-HSA-199418	REAC	Negative regulation of the PI3K/AKT network	PIK3CD,NRG3,FGF4,FGF23,FGF6,PIP4K2C,FGF9,TRAT1,PDGFRA,FYN,FGF20
query_1	TRUE	0.0445124	36	2975	6	0.00201681	0.166667	REAC:R-HSA-5173214	REAC	O-glycosylation of TSR domain-containing proteins	SPON1,ADAMTS8,THSD1,ADAMTS9,SEMA5B,ADAMTS12
query_1	TRUE	0.0451172	26	2975	5	0.00168067	0.192308	REAC:R-HSA-1187000	REAC	Fertilization	ADAM21,CATSPERB,ZP2,IZUMO2,ADAM2
query_1	TRUE	0.0451172	9	2975	3	0.0010084	0.333333	REAC:R-HSA-193634	REAC	Axonal growth inhibition (RHOA activation)	LINGO1,NGFR,MAG
query_1	TRUE	0.0451172	71	2975	9	0.00302521	0.126761	REAC:R-HSA-1980143	REAC	Signaling by NOTCH1	NEURL1,DTX4,DTX1,DLK1,DLL4,HDAC4,HEY2,DLL1,MAMLD1
query_1	TRUE	0.0451172	9	2975	3	0.0010084	0.333333	REAC:R-HSA-390696	REAC	Adrenoceptors	ADRA2A,ADRA2C,ADRB3
query_1	TRUE	0.0451172	26	2975	5	0.00168067	0.192308	REAC:R-HSA-1971475	REAC	A tetrasaccharide linker sequence is required for GAG synthesis	BCAN,B3GAT1,NCAN,VCAN,GPC4
query_1	TRUE	0.0451172	59	2975	8	0.00268908	0.135593	REAC:R-HSA-4086398	REAC	Ca2+ pathway	AGO3,WNT11,TNRC6C,GNG7,PPP3R1,PLCB1,ITPR1,LEF1
query_1	TRUE	0.0454891	97	2975	11	0.00369748	0.113402	REAC:R-HSA-193704	REAC	p75 NTR receptor-mediated signalling	VAV3,ARHGEF7,MCF2L,LINGO1,ABR,AATF,NGFR,MAG,ARHGEF4,TIAM1,VAV2
query_1	TRUE	0.046031	17	2975	4	0.00134454	0.235294	REAC:R-HSA-8853338	REAC	Signaling by FGFR3 point mutants in cancer	FGF4,FGF23,FGF9,FGF20
query_1	TRUE	0.046031	17	2975	4	0.00134454	0.235294	REAC:R-HSA-5655332	REAC	Signaling by FGFR3 in disease	FGF4,FGF23,FGF9,FGF20
query_1	TRUE	0.046031	17	2975	4	0.00134454	0.235294	REAC:R-HSA-181429	REAC	Serotonin Neurotransmitter Release Cycle	SLC18A2,SYN3,SYN2,CPLX1
query_1	TRUE	0.0472384	257	2975	22	0.00739496	0.0856031	REAC:R-HSA-76002	REAC	Platelet activation, signaling and aggregation	PDPN,VAV3,CYB5R1,PRKCQ,ADRA2A,IGF2,A2M,IGF1,PRKCB,GNG7,PRKCG,A1BG,ITPR1,ADRA2C,F2RL2,F2R,LCP2,F13A1,FYN,DGKI,VAV2,DGKK
query_1	TRUE	0.0485799	60	2975	8	0.00268908	0.133333	REAC:R-HSA-2022090	REAC	Assembly of collagen fibrils and other multimeric structures	TLL2,COL4A1,COL4A2,COL5A3,PXDN,COL4A4,COL4A3,COL12A1
