# Supplementary material for: Inhibition of Histone H3K27 Demethylases Inactivates Brachyury (TBXT) and Promotes Chordoma Cell Death
Source: Oxford University Press journal article supplement (doi:10.1158/0008-5472.can-20-1387), 2020-08-27
Supplement: 00085472can201387-sup-242008_2_supp_6494236_qnymtn.xlsx [file 00085472can201387-sup-242008_2_supp_6494236_qnymtn.xlsx]

## Sheet: Overlap all lines down 2-fold
	gene	MUG_LFC	UCH_LFC	UM_LFC	UCH7_LFC	SYMBOL	GENENAME
28	ENSG00000006468	-2.0297	-1.82061	-1.61165	-1.25531	ETV1	ETS variant 1
67	ENSG00000024526	-1.09574	-1.10076	-2.13686	-1.04708	DEPDC1	DEP domain containing 1
83	ENSG00000037280	-1.23309	-1.91088	-1.70713	-1.33364	FLT4	fms related tyrosine kinase 4
154	ENSG00000068615	-1.12051	-1.11657	-1.1133	-1.06907	REEP1	receptor accessory protein 1
224	ENSG00000082497	-1.46688	-1.46323	-1.36307	-1.29336	SERTAD4	SERTA domain containing 4
228	ENSG00000083782	-1.48278	-1.78222	-1.92733	-1.22978	EPYC	epiphycan
234	ENSG00000086205	-3.04922	-1.04284	-1.26916	-1.77668	FOLH1	folate hydrolase 1
245	ENSG00000087586	-1.49529	-1.2117	-2.64363	-1.22746	AURKA	aurora kinase A
247	ENSG00000088002	-2.36028	-2.70918	-3.74601	-2.54461	SULT2B1	sulfotransferase family 2B member 1
319	ENSG00000100526	-1.17946	-1.55572	-2.39702	-1.2576	CDKN3	cyclin dependent kinase inhibitor 3
351	ENSG00000102038	-1.36728	-1.40406	-1.55486	-1.25515	SMARCA1	SWI/SNF related, matrix associated, actin dependent regulator of chromatin, subfamily a, member 1
370	ENSG00000103034	-1.00246	-1.24691	-1.78255	-2.26974	NDRG4	NDRG family member 4
479	ENSG00000108813	-1.22162	-1.47807	-2.41351	-1.02688	DLX4	distal-less homeobox 4
485	ENSG00000108984	-1.66792	-1.97421	-2.20495	-2.23474	MAP2K6	mitogen-activated protein kinase kinase 6
532	ENSG00000111665	-1.33399	-1.36116	-3.29749	-1.45015	CDCA3	cell division cycle associated 3
567	ENSG00000112984	-1.67071	-2.35712	-2.83191	-2.15555	KIF20A	kinesin family member 20A
576	ENSG00000113368	-1.64144	-1.27538	-1.80129	-1.59397	LMNB1	lamin B1
589	ENSG00000114251	-1.40761	-1.00614	-1.48971	-1.62157	WNT5A	Wnt family member 5A
593	ENSG00000114446	-1.54417	-1.34858	-2.69569	-1.49036	IFT57	intraflagellar transport 57
594	ENSG00000114455	-2.10243	-1.11826	-2.84709	-1.73355	HHLA2	HERV-H LTR-associating 2
609	ENSG00000115226	-1.63076	-1.83319	-2.26692	-1.20564	FNDC4	fibronectin type III domain containing 4
612	ENSG00000115252	-2.19041	-1.23849	-2.00874	-1.13211	PDE1A	phosphodiesterase 1A
621	ENSG00000115525	-2.14056	-1.07449	-1.35735	-1.87178	ST3GAL5	ST3 beta-galactoside alpha-2,3-sialyltransferase 5
640	ENSG00000116661	-1.58665	-1.23495	-1.94608	-2.77646	FBXO2	F-box protein 2
661	ENSG00000117399	-2.1403	-1.37015	-1.74736	-1.80715	CDC20	cell division cycle 20
677	ENSG00000118523	-1.93572	-2.33467	-2.74739	-1.46016	CTGF	connective tissue growth factor
689	ENSG00000119403	-1.31986	-1.4573	-1.8424	-1.18767	PHF19	PHD finger protein 19
744	ENSG00000122986	-1.37017	-2.83649	-2.54891	-1.22704	HVCN1	hydrogen voltage gated channel 1
745	ENSG00000123080	-1.2881	-1.44731	-1.99322	-1.7703	CDKN2C	cyclin dependent kinase inhibitor 2C
764	ENSG00000124126	-1.5641	-1.96102	-1.03617	-1.68428	PREX1	phosphatidylinositol-3,4,5-trisphosphate dependent Rac exchange factor 1
770	ENSG00000124406	-1.97953	-1.55571	-1.14303	-1.58698	ATP8A1	ATPase phospholipid transporting 8A1
773	ENSG00000124507	-2.40677	-2.59668	-2.16965	-3.04174	PACSIN1	protein kinase C and casein kinase substrate in neurons 1
791	ENSG00000125247	-1.82578	-1.48529	-2.32743	-1.7871	TMTC4	transmembrane and tetratricopeptide repeat containing 4
829	ENSG00000126785	-1.58452	-3.51944	-1.54632	-1.22145	RHOJ	ras homolog family member J
830	ENSG00000126787	-1.55634	-1.61539	-2.66525	-1.11007	DLGAP5	DLG associated protein 5
842	ENSG00000127863	-2.00867	-2.59313	-1.4878	-2.13545	TNFRSF19	TNF receptor superfamily member 19
845	ENSG00000127951	-1.82462	-1.68823	-1.31939	-1.38473	FGL2	fibrinogen like 2
850	ENSG00000128268	-2.25967	-1.14646	-1.49231	-1.01071	MGAT3	mannosyl (beta-1,4-)-glycoprotein beta-1,4-N-acetylglucosaminyltransferase
873	ENSG00000129514	-2.23155	-2.32304	-1.88517	-1.44248	FOXA1	forkhead box A1
920	ENSG00000131747	-1.46434	-1.30135	-2.51129	-1.30096	TOP2A	DNA topoisomerase II alpha
921	ENSG00000131771	-1.87668	-2.51892	-2.63349	-1.23806	PPP1R1B	protein phosphatase 1 regulatory inhibitor subunit 1B
948	ENSG00000132938	-1.92604	-2.49334	-1.26841	-2.16443	MTUS2	microtubule associated scaffold protein 2
975	ENSG00000134057	-1.16889	-1.31378	-3.14804	-1.44316	CCNB1	cyclin B1
984	ENSG00000134222	-2.33059	-1.06744	-2.12893	-1.37933	PSRC1	proline and serine rich coiled-coil 1
994	ENSG00000134376	-1.2977	-2.45445	-2.78116	-2.95106	CRB1	crumbs 1, cell polarity complex component
998	ENSG00000134532	-1.02887	-1.52378	-1.53378	-1.02583	SOX5	SRY-box 5
1001	ENSG00000134690	-1.2338	-1.02277	-1.93214	-1.13301	CDCA8	cell division cycle associated 8
1018	ENSG00000135373	-2.29572	-2.57181	-1.43504	-1.32462	EHF	ETS homologous factor
1019	ENSG00000135451	-1.34368	-1.57515	-2.62072	-1.08736	TROAP	trophinin associated protein
1102	ENSG00000138061	-2.24834	-1.88974	-2.52766	-1.38134	CYP1B1	cytochrome P450 family 1 subfamily B member 1
1122	ENSG00000138801	-1.20675	-1.35141	-1.3362	-1.3904	PAPSS1	3'-phosphoadenosine 5'-phosphosulfate synthase 1
1130	ENSG00000139219	-1.49226	-1.38165	-1.20858	-1.55976	COL2A1	collagen type II alpha 1 chain
1135	ENSG00000139292	-1.35385	-1.72252	-2.17999	-1.15688	LGR5	leucine rich repeat containing G protein-coupled receptor 5
1159	ENSG00000140451	-3.35213	-2.87535	-2.67701	-1.76999	PIF1	PIF1 5'-to-3' DNA helicase
1170	ENSG00000140835	-2.00932	-2.06628	-2.32913	-2.09571	CHST4	carbohydrate sulfotransferase 4
1175	ENSG00000140937	-1.74909	-2.57222	-1.06056	-1.53528	CDH11	cadherin 11
1261	ENSG00000144821	-1.08111	-1.60512	-2.10618	-1.53197	MYH15	myosin heavy chain 15
1286	ENSG00000145864	-2.08772	-1.89379	-4.22982	-1.87009	GABRB2	gamma-aminobutyric acid type A receptor beta2 subunit
1309	ENSG00000146938	-1.3379	-1.67275	-1.08293	-1.61095	NLGN4X	neuroligin 4, X-linked
1386	ENSG00000150672	-1.18159	-1.75734	-2.42274	-1.07801	DLG2	discs large MAGUK scaffold protein 2
1405	ENSG00000151834	-1.50323	-1.618	-2.1355	-1.49026	GABRA2	gamma-aminobutyric acid type A receptor alpha2 subunit
1460	ENSG00000154080	-2.92651	-1.7539	-2.00613	-2.053	CHST9	carbohydrate sulfotransferase 9
1503	ENSG00000156395	-2.12248	-1.79918	-2.31012	-1.36485	SORCS3	sortilin related VPS10 domain containing receptor 3
1510	ENSG00000156966	-2.42316	-1.09725	-1.375	-1.17051	B3GNT7	UDP-GlcNAc:betaGal beta-1,3-N-acetylglucosaminyltransferase 7
1524	ENSG00000157570	-1.01734	-2.90848	-1.39907	-2.83642	TSPAN18	tetraspanin 18
1566	ENSG00000159640	-1.79231	-1.37939	-2.25921	-1.98363	ACE	angiotensin I converting enzyme
1610	ENSG00000162063	-2.02919	-1.44694	-1.98996	-1.46661	CCNF	cyclin F
1674	ENSG00000163430	-1.18026	-1.1125	-2.30981	-1.51039	FSTL1	follistatin like 1
1678	ENSG00000163492	-1.79827	-1.61111	-1.83487	-1.31405	CCDC141	coiled-coil domain containing 141
1687	ENSG00000163623	-1.35925	-2.06172	-1.9476	-1.1234	NKX6-1	NK6 homeobox 1
1788	ENSG00000165905	-2.14639	-1.75975	-2.51677	-2.45559	LARGE2	LARGE xylosyl- and glucuronyltransferase 2
1821	ENSG00000166851	-2.41032	-2.13701	-3.54159	-1.86977	PLK1	polo like kinase 1
1862	ENSG00000168078	-1.06418	-1.06114	-1.59646	-1.09134	PBK	PDZ binding kinase
1863	ENSG00000168079	-3.19534	-1.99899	-2.94664	-1.90561	SCARA5	scavenger receptor class A member 5
1865	ENSG00000168291	-1.52716	-1.79473	-1.54928	-1.198	PDHB	pyruvate dehydrogenase E1 beta subunit
1867	ENSG00000168309	-3.34736	-2.20241	-2.12211	-2.36543	FAM107A	family with sequence similarity 107 member A
1876	ENSG00000168497	-1.84748	-1.53083	-1.6164	-1.41227	CAVIN2	caveolae associated protein 2
1890	ENSG00000168874	-1.63469	-2.16091	-1.84391	-1.53945	ATOH8	atonal bHLH transcription factor 8
1984	ENSG00000171243	-1.44202	-1.70394	-4.52996	-1.54447	SOSTDC1	sclerostin domain containing 1
1989	ENSG00000171345	-1.10059	-1.07546	-1.00041	-1.29781	KRT19	keratin 19
2049	ENSG00000173376	-1.02058	-1.63548	-1.67308	-2.00672	NDNF	neuron derived neurotrophic factor
2073	ENSG00000173826	-1.36901	-1.41373	-1.94298	-2.19775	KCNH6	potassium voltage-gated channel subfamily H member 6
2149	ENSG00000177283	-1.05299	-1.34845	-1.26708	-1.24818	FZD8	frizzled class receptor 8
2227	ENSG00000180875	-1.09741	-1.79833	-2.01396	-1.27811	GREM2	gremlin 2, DAN family BMP antagonist
2233	ENSG00000181036	-1.69859	-4.11128	-1.04565	-2.37137	FCRL6	Fc receptor like 6
2267	ENSG00000182521	-2.81024	-1.24453	-1.84589	-1.69808	TBPL2	TATA-box binding protein like 2
2486	ENSG00000185052	-3.02589	-3.72503	-2.84601	-2.02022	SLC24A3	solute carrier family 24 member 3
2499	ENSG00000185361	-2.14489	-1.50687	-1.58162	-1.4711	TNFAIP8L1	TNF alpha induced protein 8 like 1
2502	ENSG00000185477	-2.88889	-1.91018	-3.59577	-2.31331	GPRIN3	GPRIN family member 3
2507	ENSG00000185585	-1.8288	-1.68357	-1.94344	-1.55804	OLFML2A	olfactomedin like 2A
2541	ENSG00000186471	-2.72713	-1.20341	-1.81	-1.22514	AKAP14	A-kinase anchoring protein 14
2544	ENSG00000186603	-1.42227	-1.01443	-1.89909	-1.85141	HPDL	4-hydroxyphenylpyruvate dioxygenase like
2610	ENSG00000188580	-3.41824	-1.95896	-4.67142	-1.79878	NKAIN2	sodium/potassium transporting ATPase interacting 2
2732	ENSG00000198695	-5.19235	-2.83274	-3.74657	-6.48588	ND6	NADH dehydrogenase, subunit 6 (complex I)
2733	ENSG00000198712	-5.81927	-3.49437	-2.96131	-6.41807	COX2	cytochrome c oxidase subunit II
2735	ENSG00000198727	-4.47231	-2.50882	-1.22774	-6.18637	CYTB	cytochrome b
2743	ENSG00000198786	-4.51602	-2.43112	-2.16811	-6.77556	ND5	NADH dehydrogenase, subunit 5 (complex I)
2746	ENSG00000198804	-5.86473	-4.05951	-2.99431	-7.16987	COX1	cytochrome c oxidase subunit I
2750	ENSG00000198840	-5.15875	-3.85875	-1.53858	-6.73012	ND3	NADH dehydrogenase, subunit 3 (complex I)
2754	ENSG00000198886	-4.39931	-2.88832	-2.21678	-6.50329	ND4	NADH dehydrogenase, subunit 4 (complex I)
2755	ENSG00000198888	-4.76575	-3.4411	-1.49028	-6.72797	ND1	NADH dehydrogenase, subunit 1 (complex I)
2758	ENSG00000198899	-5.1401	-3.51745	-1.95235	-6.40287	ATP6	ATP synthase F0 subunit 6
2759	ENSG00000198901	-1.26666	-1.31204	-1.74781	-1.38595	PRC1	protein regulator of cytokinesis 1
2764	ENSG00000198938	-6.34834	-4.1964	-3.16926	-6.29132	COX3	cytochrome c oxidase III
2867	ENSG00000212907	-4.41714	-2.90913	-1.83715	-7.2077	ND4L	NADH dehydrogenase, subunit 4L (complex I)
2878	ENSG00000213347	-1.19118	-1.11185	-2.34628	-1.62774	MXD3	MAX dimerization protein 3
2910	ENSG00000221843	-1.46687	-2.81962	-1.87714	-1.33097	C2orf16	chromosome 2 open reading frame 16
2929	ENSG00000225556	-2.4653	-1.90405	-1.5288	-1.58137	C2CD4D	C2 calcium dependent domain containing 4D
2941	ENSG00000228253	-5.15277	-3.91154	-2.13962	-5.69628	ATP8	ATP synthase F0 subunit 8
3511	ENSG00000239282	-1.56516	-1.77368	-1.10814	-1.58353	CASTOR1	cytosolic arginine sensor for mTORC1 subunit 1

## Sheet: Reactome overlap genes down
Pathway identifier	Pathway name	#Entities found	#Entities total	Entities ratio	Entities pValue	Entities FDR	#Reactions found	#Reactions total	Reactions ratio	Species identifier	Species name	Submitted entities found	Mapped entities	Found reaction identifiers
R-HSA-163200	Respiratory electron transport, ATP synthesis by chemiosmotic coupling, and heat production by uncoupling proteins.	11	146	0.0105271	1.08501e-07	4.11218e-05	12	29	0.00249077	9606	Homo sapiens	ND6;ATP8;ATP6;COX3;COX2;ND1;COX1;CYTB;ND3;ND5;ND4		R-HSA-6799191;R-HSA-164834;R-HSA-164832;R-HSA-163217;R-HSA-6799202;R-HSA-6799199;R-HSA-164651;R-HSA-6799197;R-HSA-164840;R-HSA-6799196;R-HSA-6799179;R-HSA-163214
R-HSA-611105	Respiratory electron transport	9	115	0.00829187	1.19303e-06	0.000162266	9	19	0.00163188	9606	Homo sapiens	ND6;COX3;COX2;ND1;COX1;CYTB;ND3;ND5;ND4		R-HSA-6799191;R-HSA-163217;R-HSA-6799202;R-HSA-6799199;R-HSA-164651;R-HSA-6799197;R-HSA-6799196;R-HSA-6799179;R-HSA-163214
R-HSA-1428517	The citric acid (TCA) cycle and respiratory electron transport	12	229	0.0165116	1.28782e-06	0.000162266	15	65	0.00558275	9606	Homo sapiens	ND6;ATP8;ATP6;COX3;COX2;ND1;COX1;PDHB;CYTB;ND3;ND5;ND4		R-HSA-164834;R-HSA-164832;R-HSA-71397;R-HSA-6799202;R-HSA-203946;R-HSA-164651;R-HSA-204169;R-HSA-164840;R-HSA-6799179;R-HSA-163214;R-HSA-6799191;R-HSA-163217;R-HSA-6799199;R-HSA-6799197;R-HSA-6799196
R-HSA-176417	Phosphorylation of Emi1	3	8	0.000576826	5.7854e-05	0.00468434	2	2	0.000171777	9606	Homo sapiens	CDC20;CCNB1;PLK1		R-HSA-174122;R-HSA-174174
R-HSA-156711	Polo-like kinase mediated events	4	23	0.00165837	6.24578e-05	0.00468434	9	15	0.00128833	9606	Homo sapiens	CCNB1;PLK1		R-HSA-162657;R-HSA-4088298;R-HSA-156678;R-HSA-4088134;R-HSA-156699;R-HSA-4088130;R-HSA-4088306;R-HSA-4088307;R-HSA-4088305
R-HSA-6799198	Complex I biogenesis	5	57	0.00410989	0.000182654	0.0115072	6	13	0.00111655	9606	Homo sapiens	ND6;ND1;ND3;ND5;ND4		R-HSA-6799191;R-HSA-6799202;R-HSA-6799199;R-HSA-6799197;R-HSA-6799196;R-HSA-6799179
R-HSA-8951671	RUNX3 regulates YAP1-mediated transcription	2	9	0.000648929	0.00309498	0.145464	2	3	0.000257666	9606	Homo sapiens	CTGF		R-HSA-8951695;R-HSA-1989766
R-HSA-2980767	Activation of NIMA Kinases NEK9, NEK6, NEK7	2	9	0.000648929	0.00309498	0.145464	2	4	0.000343554	9606	Homo sapiens	CCNB1;PLK1		R-HSA-2984220;R-HSA-2984226
R-HSA-69278	Cell Cycle, Mitotic	12	569	0.0410268	0.00547961	0.230144	114	334	0.0286868	9606	Homo sapiens	TOP2A;CDC20;CCNB1;CDKN2C;PLK1;CDCA8;KIF20A;AURKA;LMNB1		R-HSA-375302;R-HSA-2172194;R-HSA-156673;R-HSA-156678;R-HSA-156682;R-HSA-174088;R-HSA-2294574;R-HSA-2990882;R-HSA-2984226;R-HSA-2294580;R-HSA-156699;R-HSA-8853405;R-HSA-174104;R-HSA-174105;R-HSA-2294590;R-HSA-380455;R-HSA-174119;R-HSA-174122;R-HSA-174120;R-HSA-3000327;R-HSA-174121;R-HSA-8853419;R-HSA-156723;R-HSA-2984220;R-HSA-2466068;R-HSA-8853429;R-HSA-2172183;R-HSA-174132;R-HSA-8964531;R-HSA-17…
R-HSA-68884	Mitotic Telophase/Cytokinesis	2	14	0.00100945	0.00727265	0.240649	3	5	0.000429443	9606	Homo sapiens	PLK1;KIF20A		R-HSA-156723;R-HSA-156673;R-HSA-156682
R-HSA-210747	Regulation of gene expression in early pancreatic precursor cells	2	14	0.00100945	0.00727265	0.240649	1	6	0.000515331	9606	Homo sapiens	NKX6-1		R-HSA-210780
R-HSA-977441	GABA A receptor activation	2	15	0.00108155	0.00829998	0.240649	1	1	8.58885e-05	9606	Homo sapiens	GABRA2;GABRB2		R-HSA-975340
R-HSA-453276	Regulation of mitotic cell cycle	4	90	0.00648929	0.00923411	0.240649	29	38	0.00326376	9606	Homo sapiens	CDC20;CCNB1;PLK1;AURKA		R-HSA-174144;R-HSA-174209;R-HSA-174088;R-HSA-174159;R-HSA-174157;R-HSA-179410;R-HSA-174227;R-HSA-174224;R-HSA-174171;R-HSA-174235;R-HSA-174104;R-HSA-174105;R-HSA-179417;R-HSA-174174;R-HSA-174238;R-HSA-179421;R-HSA-174119;R-HSA-174122;R-HSA-174251;R-HSA-174120;R-HSA-174121;R-HSA-174255;R-HSA-141423;R-HSA-174195;R-HSA-174132;R-HSA-141429;R-HSA-174202;R-HSA-174203;R-HSA-141437
R-HSA-174143	APC/C-mediated degradation of cell cycle proteins	4	90	0.00648929	0.00923411	0.240649	29	38	0.00326376	9606	Homo sapiens	CDC20;CCNB1;PLK1;AURKA		R-HSA-174144;R-HSA-174209;R-HSA-174088;R-HSA-174159;R-HSA-174157;R-HSA-179410;R-HSA-174227;R-HSA-174224;R-HSA-174171;R-HSA-174235;R-HSA-174104;R-HSA-174105;R-HSA-179417;R-HSA-174174;R-HSA-174238;R-HSA-179421;R-HSA-174119;R-HSA-174122;R-HSA-174251;R-HSA-174120;R-HSA-174121;R-HSA-174255;R-HSA-141423;R-HSA-174195;R-HSA-174132;R-HSA-141429;R-HSA-174202;R-HSA-174203;R-HSA-141437
R-HSA-4615885	SUMOylation of DNA replication proteins	3	48	0.00346096	0.00962597	0.240649	5	8	0.000687108	9606	Homo sapiens	TOP2A;CDCA8;AURKA		R-HSA-4641350;R-HSA-5228525;R-HSA-4641342;R-HSA-4655404;R-HSA-4655355
R-HSA-162658	Golgi Cisternae Pericentriolar Stack Reorganization	2	17	0.00122576	0.0105369	0.242349	4	6	0.000515331	9606	Homo sapiens	CCNB1;PLK1		R-HSA-2172194;R-HSA-2314566;R-HSA-2172183;R-HSA-2214351
R-HSA-2032785	YAP1- and WWTR1 (TAZ)-stimulated gene expression	2	18	0.00129786	0.0117442	0.258373	1	9	0.000772997	9606	Homo sapiens	CTGF		R-HSA-1989766
R-HSA-176412	Phosphorylation of the APC/C	2	19	0.00136996	0.0130092	0.273194	2	2	0.000171777	9606	Homo sapiens	CCNB1;PLK1		R-HSA-174119;R-HSA-174132
R-HSA-6804114	TP53 Regulates Transcription of Genes Involved in G2 Cell Cycle Arrest	2	21	0.00151417	0.0157079	0.276602	2	11	0.000944774	9606	Homo sapiens	CCNB1;AURKA		R-HSA-6791235;R-HSA-6803875
R-HSA-4641263	Regulation of FZD by ubiquitination	2	22	0.00158627	0.0171394	0.276602	6	6	0.000515331	9606	Homo sapiens	FZD8;LGR5		R-HSA-4641206;R-HSA-4641236;R-HSA-4641205;R-HSA-4641253;R-HSA-4641249;R-HSA-4641246
R-HSA-6794361	Neurexins and neuroligins	3	60	0.0043262	0.0173996	0.276602	11	19	0.00163188	9606	Homo sapiens	NLGN4X;DLG2		R-HSA-6794357;R-HSA-6794356;R-HSA-6797554;R-HSA-6794338;R-HSA-6794354;R-HSA-6797568;R-HSA-6794336;R-HSA-6794349;R-HSA-6794346;R-HSA-6794345;R-HSA-6794344
R-HSA-68881	Mitotic Metaphase/Anaphase Transition	1	2	0.000144207	0.0178656	0.276602	1	1	8.58885e-05	9606	Homo sapiens	PLK1		R-HSA-163010
R-HSA-163210	Formation of ATP by chemiosmotic coupling	2	23	0.00165837	0.0186243	0.276602	3	3	0.000257666	9606	Homo sapiens	ATP8;ATP6		R-HSA-164834;R-HSA-164832;R-HSA-164840
R-HSA-174048	APC/C:Cdc20 mediated degradation of Cyclin B	2	23	0.00165837	0.0186243	0.276602	3	3	0.000257666	9606	Homo sapiens	CDC20;CCNB1		R-HSA-174227;R-HSA-174120;R-HSA-174157
R-HSA-4419969	Depolymerisation of the Nuclear Lamina	2	23	0.00165837	0.0186243	0.276602	3	6	0.000515331	9606	Homo sapiens	CCNB1;LMNB1		R-HSA-5229194;R-HSA-5195402;R-HSA-5244669
R-HSA-2980766	Nuclear Envelope Breakdown	3	63	0.0045425	0.0197573	0.276602	7	13	0.00111655	9606	Homo sapiens	CCNB1;PLK1;LMNB1		R-HSA-2984220;R-HSA-5229194;R-HSA-5195402;R-HSA-2993898;R-HSA-5244669;R-HSA-2990882;R-HSA-2984226
R-HSA-1640170	Cell Cycle	12	681	0.0491023	0.0203866	0.282747	119	423	0.0363308	9606	Homo sapiens	TOP2A;CDC20;CCNB1;CDKN2C;PLK1;CDCA8;KIF20A;AURKA;LMNB1		R-HSA-375302;R-HSA-2172194;R-HSA-156673;R-HSA-156678;R-HSA-156682;R-HSA-174088;R-HSA-2294574;R-HSA-2990882;R-HSA-2984226;R-HSA-912408;R-HSA-2294580;R-HSA-156699;R-HSA-8853405;R-HSA-174104;R-HSA-174105;R-HSA-2294590;R-HSA-380455;R-HSA-174119;R-HSA-174122;R-HSA-174120;R-HSA-3000327;R-HSA-174121;R-HSA-8853419;R-HSA-156723;R-HSA-2984220;R-HSA-2466068;R-HSA-8853429;R-HSA-2172183;R-HSA-174132;R-HSA-896…
R-HSA-1362277	Transcription of E2F targets under negative control by DREAM complex	2	25	0.00180258	0.0217498	0.282747	2	12	0.00103066	9606	Homo sapiens	TOP2A		R-HSA-8964475;R-HSA-8964531
R-HSA-9013695	NOTCH4 Intracellular Domain Regulates Transcription	2	26	0.00187468	0.0233883	0.293472	2	9	0.000772997	9606	Homo sapiens	FLT4		R-HSA-9604451;R-HSA-9604471
R-HSA-975574	Reactions specific to the hybrid N-glycan synthesis pathway	1	3	0.00021631	0.0266793	0.293472	1	1	8.58885e-05	9606	Homo sapiens	MGAT3		R-HSA-975926
R-HSA-205017	NFG and proNGF binds to p75NTR	1	3	0.00021631	0.0266793	0.293472	1	2	0.000171777	9606	Homo sapiens	SORCS3		R-HSA-193642
R-HSA-352238	Breakdown of the nuclear lamina	1	3	0.00021631	0.0266793	0.293472	1	3	0.000257666	9606	Homo sapiens	LMNB1		R-HSA-264871
R-HSA-174178	APC/C:Cdh1 mediated degradation of Cdc20 and other APC/C:Cdh1 targeted proteins in late mitosis/early G1	3	72	0.00519143	0.0278372	0.296162	3	4	0.000343554	9606	Homo sapiens	CDC20;PLK1;AURKA		R-HSA-174195;R-HSA-174088;R-HSA-174105
R-HSA-156584	Cytosolic sulfonation of small molecules	3	72	0.00519143	0.0278372	0.296162	6	24	0.00206132	9606	Homo sapiens	SULT2B1;PAPSS1		R-HSA-176609;R-HSA-176631;R-HSA-176517;R-HSA-174389;R-HSA-174392;R-HSA-176494
R-HSA-201451	Signaling by BMP	2	30	0.0021631	0.0304246	0.296162	1	17	0.0014601	9606	Homo sapiens	GREM2;FSTL1		R-HSA-201810
R-HSA-176814	Activation of APC/C and APC/C:Cdc20 mediated degradation of mitotic proteins	3	76	0.00547985	0.0319122	0.296162	15	15	0.00128833	9606	Homo sapiens	CDC20;CCNB1;PLK1		R-HSA-174144;R-HSA-174119;R-HSA-174120;R-HSA-174121;R-HSA-174255;R-HSA-174157;R-HSA-179410;R-HSA-174227;R-HSA-174132;R-HSA-174202;R-HSA-174171;R-HSA-174104;R-HSA-179417;R-HSA-174238;R-HSA-179421
R-HSA-8949613	Cristae formation	2	31	0.0022352	0.0322993	0.296162	1	2	0.000171777	9606	Homo sapiens	ATP8;ATP6		R-HSA-8949580
R-HSA-2500257	Resolution of Sister Chromatid Cohesion	4	133	0.00958973	0.0329069	0.296162	6	8	0.000687108	9606	Homo sapiens	CDC20;CCNB1;PLK1;CDCA8		R-HSA-2468293;R-HSA-2466068;R-HSA-2484822;R-HSA-1638803;R-HSA-2468287;R-HSA-1638821
R-HSA-69273	Cyclin A/B1/B2 associated events during G2/M transition	2	32	0.0023073	0.0342183	0.307965	11	25	0.00214721	9606	Homo sapiens	CCNB1;PLK1		R-HSA-170131;R-HSA-170161;R-HSA-170070;R-HSA-170055;R-HSA-4088024;R-HSA-170072;R-HSA-170057;R-HSA-170153;R-HSA-170126;R-HSA-170044;R-HSA-170076
R-HSA-8854521	Interaction between PHLDA1 and AURKA	1	4	0.000288413	0.0354145	0.318731	2	2	0.000171777	9606	Homo sapiens	AURKA		R-HSA-8853429;R-HSA-8853444
R-HSA-176408	Regulation of APC/C activators between G1/S and early anaphase	3	82	0.00591247	0.0385769	0.338554	10	14	0.00120244	9606	Homo sapiens	CDC20;CCNB1;PLK1		R-HSA-174209;R-HSA-141429;R-HSA-174122;R-HSA-174203;R-HSA-174235;R-HSA-174251;R-HSA-174174;R-HSA-174159;R-HSA-141423;R-HSA-141437
R-HSA-210745	Regulation of gene expression in beta cells	2	35	0.00252361	0.0402321	0.338554	1	12	0.00103066	9606	Homo sapiens	NKX6-1		R-HSA-211350
R-HSA-9013508	NOTCH3 Intracellular Domain Regulates Transcription	2	36	0.00259572	0.0423192	0.338554	2	22	0.00188955	9606	Homo sapiens	DLGAP5		R-HSA-9018538;R-HSA-9018542
R-HSA-69275	G2/M Transition	5	211	0.0152138	0.0429142	0.343314	45	78	0.0066993	9606	Homo sapiens	CCNB1;PLK1;AURKA		R-HSA-8853444;R-HSA-3002798;R-HSA-380294;R-HSA-156678;R-HSA-170055;R-HSA-380303;R-HSA-170057;R-HSA-170126;R-HSA-4088306;R-HSA-4088307;R-HSA-4088305;R-HSA-170131;R-HSA-3000319;R-HSA-380311;R-HSA-4088298;R-HSA-170070;R-HSA-8852306;R-HSA-3002811;R-HSA-156699;R-HSA-8853405;R-HSA-2574845;R-HSA-170072;R-HSA-8852317;R-HSA-8854044;R-HSA-3000310;R-HSA-8854041;R-HSA-170076;R-HSA-2574840;R-HSA-380455;R-HSA-…
R-HSA-5579000	Defective CYP1B1 causes Glaucoma	1	5	0.000360516	0.044072	0.352576	1	1	8.58885e-05	9606	Homo sapiens	CYP1B1		R-HSA-5605147
R-HSA-453274	Mitotic G2-G2/M phases	5	213	0.015358	0.0443681	0.354945	45	80	0.00687108	9606	Homo sapiens	CCNB1;PLK1;AURKA		R-HSA-8853444;R-HSA-3002798;R-HSA-380294;R-HSA-156678;R-HSA-170055;R-HSA-380303;R-HSA-170057;R-HSA-170126;R-HSA-4088306;R-HSA-4088307;R-HSA-4088305;R-HSA-170131;R-HSA-3000319;R-HSA-380311;R-HSA-4088298;R-HSA-170070;R-HSA-8852306;R-HSA-3002811;R-HSA-156699;R-HSA-8853405;R-HSA-2574845;R-HSA-170072;R-HSA-8852317;R-HSA-8854044;R-HSA-3000310;R-HSA-8854041;R-HSA-170076;R-HSA-2574840;R-HSA-380455;R-HSA-…
R-HSA-1538133	G0 and Early G1	2	38	0.00273992	0.0466121	0.355095	2	27	0.00231899	9606	Homo sapiens	TOP2A		R-HSA-8964475;R-HSA-8964531
R-HSA-2565942	Regulation of PLK1 Activity at G2/M Transition	3	92	0.0066335	0.051125	0.355095	9	12	0.00103066	9606	Homo sapiens	CCNB1;PLK1;AURKA		R-HSA-3000319;R-HSA-3002798;R-HSA-4086410;R-HSA-3002811;R-HSA-2562526;R-HSA-2574845;R-HSA-3000327;R-HSA-3000310;R-HSA-2574840
R-HSA-6794362	Protein-protein interactions at synapses	3	93	0.0067056	0.0524764	0.355095	11	33	0.00283432	9606	Homo sapiens	NLGN4X;DLG2		R-HSA-6794357;R-HSA-6794356;R-HSA-6797554;R-HSA-6794338;R-HSA-6794354;R-HSA-6797568;R-HSA-6794336;R-HSA-6794349;R-HSA-6794346;R-HSA-6794345;R-HSA-6794344
R-HSA-141424	Amplification of signal from the kinetochores	3	94	0.00677771	0.053845	0.355095	4	4	0.000343554	9606	Homo sapiens	CDC20;PLK1;CDCA8		R-HSA-141409;R-HSA-141431;R-HSA-141422;R-HSA-141439
R-HSA-141444	Amplification of signal from unattached kinetochores via a MAD2 inhibitory signal	3	94	0.00677771	0.053845	0.355095	4	4	0.000343554	9606	Homo sapiens	CDC20;PLK1;CDCA8		R-HSA-141409;R-HSA-141431;R-HSA-141422;R-HSA-141439
R-HSA-69478	G2/M DNA replication checkpoint	1	7	0.000504723	0.0611563	0.355095	2	2	0.000171777	9606	Homo sapiens	CCNB1		R-HSA-170070;R-HSA-170055
R-HSA-111957	Cam-PDE 1 activation	1	8	0.000576826	0.0695845	0.355095	2	2	0.000171777	9606	Homo sapiens	PDE1A		R-HSA-111955;R-HSA-111956
R-HSA-5340588	RNF mutants show enhanced WNT signaling and proliferation	1	8	0.000576826	0.0695845	0.355095	1	1	8.58885e-05	9606	Homo sapiens	FZD8		R-HSA-5340587
R-HSA-195399	VEGF binds to VEGFR leading to receptor dimerization	1	8	0.000576826	0.0695845	0.355095	1	3	0.000257666	9606	Homo sapiens	FLT4		R-HSA-194308
R-HSA-194313	VEGF ligand-receptor interactions	1	8	0.000576826	0.0695845	0.355095	1	4	0.000343554	9606	Homo sapiens	FLT4		R-HSA-194308
R-HSA-453279	Mitotic G1-G1/S phases	4	173	0.0124739	0.0720908	0.355095	5	98	0.00841707	9606	Homo sapiens	TOP2A;CCNB1;CDKN2C		R-HSA-182594;R-HSA-8964475;R-HSA-113638;R-HSA-8964531;R-HSA-8941895
R-HSA-140180	COX reactions	1	9	0.000648929	0.0779377	0.355095	2	2	0.000171777	9606	Homo sapiens	COX1		R-HSA-140355;R-HSA-140359
R-HSA-113507	E2F-enabled inhibition of pre-replication complex formation	1	9	0.000648929	0.0779377	0.355095	1	1	8.58885e-05	9606	Homo sapiens	CCNB1		R-HSA-113638
R-HSA-69618	Mitotic Spindle Checkpoint	3	110	0.00793136	0.0779953	0.355095	7	7	0.00060122	9606	Homo sapiens	CDC20;PLK1;CDCA8		R-HSA-141409;R-HSA-141431;R-HSA-141429;R-HSA-141422;R-HSA-141439;R-HSA-141423;R-HSA-141437
R-HSA-2299718	Condensation of Prophase Chromosomes	2	55	0.00396568	0.0886022	0.355095	5	10	0.000858885	9606	Homo sapiens	CCNB1;PLK1		R-HSA-2245218;R-HSA-2294580;R-HSA-2294600;R-HSA-2294574;R-HSA-2294590
R-HSA-446107	Type I hemidesmosome assembly	1	11	0.000793136	0.0944215	0.355095	1	6	0.000515331	9606	Homo sapiens	KRT19		R-HSA-446077
R-HSA-2162123	Synthesis of Prostaglandins (PG) and Thromboxanes (TX)	2	58	0.00418199	0.0968685	0.355095	7	32	0.00274843	9606	Homo sapiens	COX2;COX1		R-HSA-2309779;R-HSA-140355;R-HSA-2314678;R-HSA-140359;R-HSA-2309787;R-HSA-2314686;R-HSA-2309773
R-HSA-2993913	Clearance of Nuclear Envelope Membranes from Chromatin	1	12	0.000865239	0.102553	0.355095	1	1	8.58885e-05	9606	Homo sapiens	LMNB1		R-HSA-2993898
R-HSA-2465910	MASTL Facilitates Mitotic Progression	1	12	0.000865239	0.102553	0.355095	1	4	0.000343554	9606	Homo sapiens	CCNB1		R-HSA-2430533
R-HSA-5628897	TP53 Regulates Metabolic Genes	3	125	0.00901291	0.104184	0.355095	1	34	0.00292021	9606	Homo sapiens	COX3;COX2;COX1		R-HSA-163214
R-HSA-977443	GABA receptor activation	2	62	0.0044704	0.108213	0.355095	1	9	0.000772997	9606	Homo sapiens	GABRA2;GABRB2		R-HSA-975340
R-HSA-5140745	WNT5A-dependent internalization of FZD2, FZD5 and ROR2	1	13	0.000937342	0.110613	0.355095	2	2	0.000171777	9606	Homo sapiens	WNT5A		R-HSA-5140747;R-HSA-5140741
R-HSA-174362	Transport and synthesis of PAPS	1	13	0.000937342	0.110613	0.355095	2	4	0.000343554	9606	Homo sapiens	PAPSS1		R-HSA-174389;R-HSA-174392
R-HSA-1300642	Sperm Motility And Taxes	1	13	0.000937342	0.110613	0.355095	1	4	0.000343554	9606	Homo sapiens	HVCN1		R-HSA-2534378
R-HSA-9012852	Signaling by NOTCH3	2	63	0.0045425	0.111103	0.355095	2	37	0.00317788	9606	Homo sapiens	DLGAP5		R-HSA-9018538;R-HSA-9018542
R-HSA-68877	Mitotic Prometaphase	4	206	0.0148533	0.116548	0.355095	10	15	0.00128833	9606	Homo sapiens	CDC20;CCNB1;PLK1;CDCA8		R-HSA-2514854;R-HSA-2468293;R-HSA-2466068;R-HSA-2484822;R-HSA-375302;R-HSA-380316;R-HSA-380508;R-HSA-1638803;R-HSA-2468287;R-HSA-1638821
R-HSA-6791312	TP53 Regulates Transcription of Cell Cycle Genes	2	65	0.00468671	0.116942	0.355095	2	42	0.00360732	9606	Homo sapiens	CCNB1;AURKA		R-HSA-6791235;R-HSA-6803875
R-HSA-68882	Mitotic Anaphase	4	207	0.0149254	0.11805	0.355095	6	11	0.000944774	9606	Homo sapiens	CDC20;PLK1;CDCA8;LMNB1		R-HSA-174144;R-HSA-2467809;R-HSA-2467811;R-HSA-174202;R-HSA-174121;R-HSA-2995376
R-HSA-68875	Mitotic Prophase	3	133	0.00958973	0.119394	0.355095	18	34	0.00292021	9606	Homo sapiens	CCNB1;PLK1;LMNB1		R-HSA-2245218;R-HSA-2430533;R-HSA-2172194;R-HSA-5229194;R-HSA-5195402;R-HSA-2314566;R-HSA-2993898;R-HSA-2294600;R-HSA-5244669;R-HSA-2294574;R-HSA-2214351;R-HSA-2990882;R-HSA-2984226;R-HSA-2984220;R-HSA-380278;R-HSA-2172183;R-HSA-2294580;R-HSA-2294590
R-HSA-5173105	O-linked glycosylation	3	133	0.00958973	0.119394	0.355095	4	26	0.0022331	9606	Homo sapiens	B3GNT7;CHST4;LARGE2		R-HSA-5617143;R-HSA-914010;R-HSA-5617138;R-HSA-6786012
R-HSA-2555396	Mitotic Metaphase and Anaphase	4	208	0.0149975	0.119561	0.355095	7	12	0.00103066	9606	Homo sapiens	CDC20;PLK1;CDCA8;LMNB1		R-HSA-163010;R-HSA-174144;R-HSA-2467809;R-HSA-2467811;R-HSA-174202;R-HSA-174121;R-HSA-2995376
R-HSA-4608870	Asymmetric localization of PCP proteins	2	66	0.00475881	0.119891	0.355095	2	7	0.00060122	9606	Homo sapiens	WNT5A;FZD8		R-HSA-5099886;R-HSA-4608825
R-HSA-186712	Regulation of beta-cell development	2	67	0.00483092	0.122858	0.355095	2	26	0.0022331	9606	Homo sapiens	NKX6-1		R-HSA-211350;R-HSA-210780
R-HSA-425561	Sodium/Calcium exchangers	1	15	0.00108155	0.126517	0.355095	1	4	0.000343554	9606	Homo sapiens	SLC24A3		R-HSA-425678
R-HSA-2514853	Condensation of Prometaphase Chromosomes	1	15	0.00108155	0.126517	0.355095	1	4	0.000343554	9606	Homo sapiens	CCNB1		R-HSA-2514854
R-HSA-3772470	Negative regulation of TCF-dependent signaling by WNT ligand antagonists	1	15	0.00108155	0.126517	0.355095	1	5	0.000429443	9606	Homo sapiens	WNT5A		R-HSA-3769370
R-HSA-75035	Chk1/Chk2(Cds1) mediated inactivation of Cyclin B:Cdk1 complex	1	15	0.00108155	0.126517	0.355095	1	5	0.000429443	9606	Homo sapiens	CCNB1		R-HSA-170070
R-HSA-2995410	Nuclear Envelope Reassembly	1	16	0.00115365	0.134363	0.355095	1	3	0.000257666	9606	Homo sapiens	LMNB1		R-HSA-2995376
R-HSA-2995383	Initiation of Nuclear Envelope Reformation	1	16	0.00115365	0.134363	0.355095	1	3	0.000257666	9606	Homo sapiens	LMNB1		R-HSA-2995376
R-HSA-68886	M Phase	6	389	0.0280482	0.140344	0.355095	38	66	0.00566864	9606	Homo sapiens	CDC20;CCNB1;PLK1;CDCA8;KIF20A;LMNB1		R-HSA-2514854;R-HSA-2245218;R-HSA-163010;R-HSA-174144;R-HSA-375302;R-HSA-2172194;R-HSA-156673;R-HSA-2467809;R-HSA-5229194;R-HSA-5195402;R-HSA-2467811;R-HSA-2993898;R-HSA-156682;R-HSA-1638803;R-HSA-2294574;R-HSA-2990882;R-HSA-2984226;R-HSA-2294580;R-HSA-380316;R-HSA-380508;R-HSA-2468287;R-HSA-2995376;R-HSA-2294590;R-HSA-2468293;R-HSA-2430533;R-HSA-2314566;R-HSA-174121;R-HSA-2294600;R-HSA-5244669;R…
R-HSA-2559584	Formation of Senescence-Associated Heterochromatin Foci (SAHF)	1	17	0.00122576	0.142139	0.355095	1	2	0.000171777	9606	Homo sapiens	LMNB1		R-HSA-4647594
R-HSA-6811555	PI5P Regulates TP53 Acetylation	1	17	0.00122576	0.142139	0.355095	1	8	0.000687108	9606	Homo sapiens	MAP2K6		R-HSA-8877691
R-HSA-8854518	AURKA Activation by TPX2	2	74	0.00533564	0.144097	0.355095	2	2	0.000171777	9606	Homo sapiens	PLK1;AURKA		R-HSA-8853405;R-HSA-8853419
R-HSA-913709	O-linked glycosylation of mucins	2	74	0.00533564	0.144097	0.355095	2	17	0.0014601	9606	Homo sapiens	B3GNT7;CHST4		R-HSA-914010;R-HSA-6786012
R-HSA-8950505	Gene and protein expression by JAK-STAT signaling after Interleukin-12 stimulation	2	74	0.00533564	0.144097	0.355095	1	36	0.00309199	9606	Homo sapiens	LMNB1		R-HSA-8950681
R-HSA-176409	APC/C:Cdc20 mediated degradation of mitotic proteins	2	75	0.00540774	0.147192	0.355095	13	13	0.00111655	9606	Homo sapiens	CDC20;CCNB1		R-HSA-174144;R-HSA-174120;R-HSA-174121;R-HSA-174255;R-HSA-174157;R-HSA-179410;R-HSA-174227;R-HSA-174202;R-HSA-174171;R-HSA-174104;R-HSA-179417;R-HSA-174238;R-HSA-179421
R-HSA-5663220	RHO GTPases Activate Formins	3	148	0.0106713	0.149924	0.355095	3	27	0.00231899	9606	Homo sapiens	CDC20;PLK1;CDCA8		R-HSA-5666160;R-HSA-5666129;R-HSA-5666169
R-HSA-5099900	WNT5A-dependent internalization of FZD4	1	20	0.00144207	0.165054	0.355095	5	5	0.000429443	9606	Homo sapiens	WNT5A		R-HSA-5138459;R-HSA-5099899;R-HSA-5138441;R-HSA-5138432;R-HSA-5138433
R-HSA-2142816	Synthesis of (16-20)-hydroxyeicosatetraenoic acids (HETE)	1	20	0.00144207	0.165054	0.355095	3	3	0.000257666	9606	Homo sapiens	CYP1B1		R-HSA-2161795;R-HSA-2161940;R-HSA-2161814
R-HSA-141405	Inhibition of the proteolytic activity of APC/C required for the onset of anaphase by mitotic spindle checkpoint components	1	20	0.00144207	0.165054	0.355095	3	3	0.000257666	9606	Homo sapiens	CDC20		R-HSA-141429;R-HSA-141423;R-HSA-141437
R-HSA-141430	Inactivation of APC/C via direct inhibition of the APC/C complex	1	20	0.00144207	0.165054	0.355095	2	2	0.000171777	9606	Homo sapiens	CDC20		R-HSA-141423;R-HSA-141437
R-HSA-418457	cGMP effects	1	20	0.00144207	0.165054	0.355095	1	4	0.000343554	9606	Homo sapiens	PDE1A		R-HSA-418456
R-HSA-8852276	The role of GTSE1 in G2/M progression after G2 checkpoint	2	82	0.00591247	0.169214	0.355095	3	10	0.000858885	9606	Homo sapiens	CCNB1;PLK1		R-HSA-8852324;R-HSA-8852306;R-HSA-8852317
R-HSA-176407	Conversion from APC/C:Cdc20 to APC/C:Cdh1 in late anaphase	1	21	0.00151417	0.172557	0.355095	1	3	0.000257666	9606	Homo sapiens	CDC20		R-HSA-174224
R-HSA-9020591	Interleukin-12 signaling	2	85	0.00612878	0.178818	0.355095	1	56	0.00480976	9606	Homo sapiens	LMNB1		R-HSA-8950681
R-HSA-2408550	Metabolism of ingested H2SeO4 and H2SeO3 into H2Se	1	22	0.00158627	0.179992	0.355095	2	7	0.00060122	9606	Homo sapiens	PAPSS1		R-HSA-2408540;R-HSA-2408525
R-HSA-113510	E2F mediated regulation of DNA replication	1	22	0.00158627	0.179992	0.355095	1	4	0.000343554	9606	Homo sapiens	CCNB1		R-HSA-113638
R-HSA-2142770	Synthesis of 15-eicosatetraenoic acid derivatives	1	22	0.00158627	0.179992	0.355095	1	4	0.000343554	9606	Homo sapiens	COX2		R-HSA-2161951
R-HSA-5210891	Uptake and function of anthrax toxins	1	22	0.00158627	0.179992	0.355095	1	19	0.00163188	9606	Homo sapiens	MAP2K6		R-HSA-5211405
R-HSA-6783783	Interleukin-10 signaling	2	86	0.00620088	0.182038	0.355095	1	15	0.00128833	9606	Homo sapiens	COX2		R-HSA-6790029
R-HSA-2142753	Arachidonic acid metabolism	3	164	0.0118249	0.184901	0.355095	13	77	0.00661342	9606	Homo sapiens	CYP1B1;COX2;COX1		R-HSA-140355;R-HSA-2161890;R-HSA-2161795;R-HSA-140359;R-HSA-2161899;R-HSA-2309773;R-HSA-2309779;R-HSA-2161940;R-HSA-2314678;R-HSA-2161814;R-HSA-2309787;R-HSA-2314686;R-HSA-2161951
R-HSA-2142670	Synthesis of epoxy (EET) and dihydroxyeicosatrienoic acids (DHET)	1	23	0.00165837	0.187362	0.355095	2	3	0.000257666	9606	Homo sapiens	CYP1B1		R-HSA-2161890;R-HSA-2161899
R-HSA-5625900	RHO GTPases activate CIT	1	23	0.00165837	0.187362	0.355095	1	6	0.000515331	9606	Homo sapiens	PRC1		R-HSA-5671970
R-HSA-112316	Neuronal System	6	435	0.0313649	0.199923	0.355095	14	161	0.0138281	9606	Homo sapiens	GABRA2;GABRB2;NLGN4X;DLG2;KCNH6		R-HSA-975340;R-HSA-6794338;R-HSA-6797568;R-HSA-6794336;R-HSA-8856398;R-HSA-6794349;R-HSA-1296127;R-HSA-6794346;R-HSA-6794345;R-HSA-6794344;R-HSA-6794357;R-HSA-6794356;R-HSA-6797554;R-HSA-6794354
R-HSA-9013694	Signaling by NOTCH4	2	92	0.0066335	0.201528	0.355095	2	20	0.00171777	9606	Homo sapiens	FLT4		R-HSA-9604451;R-HSA-9604471
R-HSA-179409	APC-Cdc20 mediated degradation of Nek2A	1	25	0.00180258	0.201904	0.355095	3	3	0.000257666	9606	Homo sapiens	CDC20		R-HSA-179410;R-HSA-179417;R-HSA-179421
R-HSA-2022870	Chondroitin sulfate biosynthesis	1	25	0.00180258	0.201904	0.355095	1	7	0.00060122	9606	Homo sapiens	CHST9		R-HSA-1971483
R-HSA-157118	Signaling by NOTCH	4	257	0.0185305	0.202659	0.355095	4	152	0.0130551	9606	Homo sapiens	FLT4;DLGAP5		R-HSA-9604451;R-HSA-9018538;R-HSA-9604471;R-HSA-9018542
R-HSA-446728	Cell junction organization	2	94	0.00677771	0.20808	0.355095	3	37	0.00317788	9606	Homo sapiens	KRT19;CDH11		R-HSA-446077;R-HSA-419002;R-HSA-419001
R-HSA-2022377	Metabolism of Angiotensinogen to Angiotensins	1	26	0.00187468	0.209078	0.355095	3	17	0.0014601	9606	Homo sapiens	ACE		R-HSA-2022398;R-HSA-2065355;R-HSA-2022405
R-HSA-194315	Signaling by Rho GTPases	6	446	0.0321581	0.215414	0.355095	9	112	0.00961951	9606	Homo sapiens	CDC20;PREX1;PRC1;PLK1;RHOJ;CDCA8		R-HSA-194913;R-HSA-194854;R-HSA-5671970;R-HSA-5666160;R-HSA-5666129;R-HSA-194922;R-HSA-195146;R-HSA-194894;R-HSA-5666169
R-HSA-450302	activated TAK1 mediates p38 MAPK activation	1	27	0.00194679	0.216188	0.355095	3	5	0.000429443	9606	Homo sapiens	MAP2K6		R-HSA-450333;R-HSA-450346;R-HSA-450296
R-HSA-3108232	SUMO E3 ligases SUMOylate target proteins	3	178	0.0128344	0.217085	0.355095	5	130	0.0111655	9606	Homo sapiens	TOP2A;CDCA8;AURKA		R-HSA-4641350;R-HSA-5228525;R-HSA-4641342;R-HSA-4655404;R-HSA-4655355
R-HSA-447115	Interleukin-12 family signaling	2	97	0.00699402	0.217948	0.355095	1	114	0.00979129	9606	Homo sapiens	LMNB1		R-HSA-8950681
R-HSA-3238698	WNT ligand biogenesis and trafficking	1	28	0.00201889	0.223234	0.355095	8	12	0.00103066	9606	Homo sapiens	WNT5A		R-HSA-3247840;R-HSA-3247843;R-HSA-3238691;R-HSA-3247844;R-HSA-3238694;R-HSA-3781941;R-HSA-3247837;R-HSA-3781943
R-HSA-4086400	PCP/CE pathway	2	99	0.00713822	0.22455	0.355095	15	24	0.00206132	9606	Homo sapiens	WNT5A;FZD8		R-HSA-3858491;R-HSA-5099886;R-HSA-5140747;R-HSA-4551555;R-HSA-5138441;R-HSA-3858482;R-HSA-3858480;R-HSA-5140741;R-HSA-5138432;R-HSA-5138433;R-HSA-5138459;R-HSA-5099899;R-HSA-4551571;R-HSA-4551570;R-HSA-4608825
R-HSA-373080	Class B/2 (Secretin family receptors)	2	99	0.00713822	0.22455	0.355095	1	20	0.00171777	9606	Homo sapiens	WNT5A;FZD8		R-HSA-201708
R-HSA-1630316	Glycosaminoglycan metabolism	3	182	0.0131228	0.226493	0.355095	4	82	0.00704286	9606	Homo sapiens	CHST9;B3GNT7;PAPSS1		R-HSA-2025724;R-HSA-1971483;R-HSA-174389;R-HSA-174392
R-HSA-9027604	Biosynthesis of electrophilic Ï‰-3 PUFA oxo-derivatives	1	29	0.00209099	0.230218	0.355095	4	20	0.00171777	9606	Homo sapiens	COX2		R-HSA-9027627;R-HSA-9027532;R-HSA-9028255;R-HSA-9027607
R-HSA-111885	Opioid Signalling	2	103	0.00742663	0.237798	0.355095	9	49	0.00420854	9606	Homo sapiens	PDE1A;PPP1R1B		R-HSA-111955;R-HSA-180038;R-HSA-111956;R-HSA-177284;R-HSA-201787;R-HSA-177275;R-HSA-180073;R-HSA-201790;R-HSA-180047
R-HSA-2990846	SUMOylation	3	187	0.0134833	0.238362	0.355095	5	139	0.0119385	9606	Homo sapiens	TOP2A;CDCA8;AURKA		R-HSA-4641350;R-HSA-5228525;R-HSA-4641342;R-HSA-4655404;R-HSA-4655355
R-HSA-204174	Regulation of pyruvate dehydrogenase (PDH) complex	1	31	0.0022352	0.243999	0.355095	2	4	0.000343554	9606	Homo sapiens	PDHB		R-HSA-203946;R-HSA-204169
R-HSA-1187000	Fertilization	1	31	0.0022352	0.243999	0.355095	1	9	0.000772997	9606	Homo sapiens	HVCN1		R-HSA-2534378
R-HSA-9025094	Biosynthesis of DPAn-3 SPMs	1	31	0.0022352	0.243999	0.355095	1	18	0.00154599	9606	Homo sapiens	COX2		R-HSA-9026408
R-HSA-8863678	Neurodegenerative Diseases	1	31	0.0022352	0.243999	0.355095	1	22	0.00188955	9606	Homo sapiens	LMNB1		R-HSA-8868340
R-HSA-8862803	Deregulated CDK5 triggers multiple neurodegenerative pathways in Alzheimer's disease models	1	31	0.0022352	0.243999	0.355095	1	22	0.00188955	9606	Homo sapiens	LMNB1		R-HSA-8868340
R-HSA-69620	Cell Cycle Checkpoints	4	279	0.0201168	0.244478	0.355095	9	57	0.00489565	9606	Homo sapiens	CDC20;CCNB1;PLK1;CDCA8		R-HSA-141409;R-HSA-170070;R-HSA-141431;R-HSA-170055;R-HSA-141429;R-HSA-141422;R-HSA-141439;R-HSA-141423;R-HSA-141437
R-HSA-8874081	MET activates PTK2 signaling	1	32	0.0023073	0.250798	0.355095	1	5	0.000429443	9606	Homo sapiens	COL2A1		R-HSA-8874079
R-HSA-375170	CDO in myogenesis	1	32	0.0023073	0.250798	0.355095	1	14	0.00120244	9606	Homo sapiens	MAP2K6		R-HSA-448951
R-HSA-525793	Myogenesis	1	32	0.0023073	0.250798	0.355095	1	14	0.00120244	9606	Homo sapiens	MAP2K6		R-HSA-448951
R-HSA-2467813	Separation of Sister Chromatids	3	193	0.0139159	0.252744	0.355095	5	8	0.000687108	9606	Homo sapiens	CDC20;PLK1;CDCA8		R-HSA-174144;R-HSA-2467809;R-HSA-2467811;R-HSA-174202;R-HSA-174121
R-HSA-193704	p75 NTR receptor-mediated signalling	2	108	0.00778715	0.254414	0.355095	2	50	0.00429443	9606	Homo sapiens	PREX1;SORCS3		R-HSA-193642;R-HSA-205039
R-HSA-9018679	Biosynthesis of EPA-derived SPMs	1	33	0.00237941	0.257536	0.355095	1	17	0.0014601	9606	Homo sapiens	COX2		R-HSA-9018880
R-HSA-111933	Calmodulin induced events	1	34	0.00245151	0.264213	0.355095	2	14	0.00120244	9606	Homo sapiens	PDE1A		R-HSA-111955;R-HSA-111956
R-HSA-111997	CaM pathway	1	34	0.00245151	0.264213	0.355095	2	15	0.00128833	9606	Homo sapiens	PDE1A		R-HSA-111955;R-HSA-111956
R-HSA-2559583	Cellular Senescence	3	198	0.0142764	0.264826	0.355095	6	89	0.00764408	9606	Homo sapiens	CDKN2C;MAP2K6;LMNB1		R-HSA-182594;R-HSA-3228469;R-HSA-3238999;R-HSA-450333;R-HSA-4647594;R-HSA-450296
R-HSA-180024	DARPP-32 events	1	35	0.00252361	0.270832	0.355095	7	11	0.000944774	9606	Homo sapiens	PPP1R1B		R-HSA-180038;R-HSA-177284;R-HSA-201787;R-HSA-177275;R-HSA-180073;R-HSA-201790;R-HSA-180047
R-HSA-418990	Adherens junctions interactions	1	35	0.00252361	0.270832	0.355095	2	16	0.00137422	9606	Homo sapiens	CDH11		R-HSA-419002;R-HSA-419001
R-HSA-9018683	Biosynthesis of DPA-derived SPMs	1	35	0.00252361	0.270832	0.355095	1	21	0.00180366	9606	Homo sapiens	COX2		R-HSA-9026408
R-HSA-2559580	Oxidative Stress Induced Senescence	2	114	0.00821977	0.274386	0.355095	5	39	0.00334965	9606	Homo sapiens	CDKN2C;MAP2K6		R-HSA-182594;R-HSA-3228469;R-HSA-3238999;R-HSA-450333;R-HSA-450296
R-HSA-9006936	Signaling by TGF-beta family members	2	114	0.00821977	0.274386	0.355095	1	107	0.00919007	9606	Homo sapiens	GREM2;FSTL1		R-HSA-201810
R-HSA-3700989	Transcriptional Regulation by TP53	6	486	0.0350422	0.274868	0.355095	5	259	0.0222451	9606	Homo sapiens	CCNB1;COX3;COX2;COX1;AURKA;MAP2K6		R-HSA-6791235;R-HSA-6803875;R-HSA-6805103;R-HSA-8877691;R-HSA-163214
R-HSA-392154	Nitric oxide stimulates guanylate cyclase	1	36	0.00259572	0.277391	0.355095	1	7	0.00060122	9606	Homo sapiens	PDE1A		R-HSA-418456
R-HSA-2022854	Keratan sulfate biosynthesis	1	37	0.00266782	0.283891	0.355095	1	9	0.000772997	9606	Homo sapiens	B3GNT7		R-HSA-2025724
R-HSA-8878159	Transcriptional regulation by RUNX3	2	118	0.00850818	0.287692	0.355095	2	47	0.00403676	9606	Homo sapiens	CTGF		R-HSA-8951695;R-HSA-1989766
R-HSA-111465	Apoptotic cleavage of cellular proteins	1	38	0.00273992	0.290334	0.355095	1	38	0.00326376	9606	Homo sapiens	LMNB1		R-HSA-264871
R-HSA-168638	NOD1/2 Signaling Pathway	1	39	0.00281203	0.296719	0.355095	2	17	0.0014601	9606	Homo sapiens	MAP2K6		R-HSA-727819;R-HSA-1247960
R-HSA-111996	Ca-dependent events	1	39	0.00281203	0.296719	0.355095	2	18	0.00154599	9606	Homo sapiens	PDE1A		R-HSA-111955;R-HSA-111956
R-HSA-6804758	Regulation of TP53 Activity through Acetylation	1	39	0.00281203	0.296719	0.355095	1	14	0.00120244	9606	Homo sapiens	MAP2K6		R-HSA-8877691
R-HSA-4791275	Signaling by WNT in cancer	1	39	0.00281203	0.296719	0.355095	1	16	0.00137422	9606	Homo sapiens	FZD8		R-HSA-5340587
R-HSA-3301854	Nuclear Pore Complex (NPC) Disassembly	1	40	0.00288413	0.303047	0.355095	1	2	0.000171777	9606	Homo sapiens	CCNB1		R-HSA-2990882
R-HSA-1474165	Reproduction	2	123	0.0088687	0.304289	0.355095	2	24	0.00206132	9606	Homo sapiens	HVCN1;LMNB1		R-HSA-912408;R-HSA-2534378
R-HSA-201681	TCF dependent signaling in response to WNT	3	216	0.0155743	0.308805	0.355095	9	71	0.00609808	9606	Homo sapiens	WNT5A;FZD8;LGR5		R-HSA-4641206;R-HSA-4641236;R-HSA-3769370;R-HSA-4641205;R-HSA-4641253;R-HSA-4641249;R-HSA-5323545;R-HSA-4641246;R-HSA-1458875
R-HSA-2559585	Oncogene Induced Senescence	1	42	0.00302834	0.315534	0.355095	1	18	0.00154599	9606	Homo sapiens	CDKN2C		R-HSA-182594
R-HSA-195258	RHO GTPase Effectors	4	315	0.0227125	0.31634	0.355095	4	107	0.00919007	9606	Homo sapiens	CDC20;PRC1;PLK1;CDCA8		R-HSA-5671970;R-HSA-5666160;R-HSA-5666129;R-HSA-5666169
R-HSA-1592230	Mitochondrial biogenesis	2	127	0.00915711	0.317519	0.355095	1	36	0.00309199	9606	Homo sapiens	ATP8;ATP6		R-HSA-8949580
R-HSA-1296072	Voltage gated Potassium channels	1	44	0.00317254	0.327799	0.355095	1	1	8.58885e-05	9606	Homo sapiens	KCNH6		R-HSA-1296127
R-HSA-212300	PRC2 methylates histones and DNA	1	44	0.00317254	0.327799	0.355095	2	4	0.000343554	9606	Homo sapiens	PHF19		R-HSA-212263;R-HSA-212252
R-HSA-1489509	DAG and IP3 signaling	1	44	0.00317254	0.327799	0.355095	2	19	0.00163188	9606	Homo sapiens	PDE1A		R-HSA-111955;R-HSA-111956
R-HSA-419037	NCAM1 interactions	1	44	0.00317254	0.327799	0.355095	1	10	0.000858885	9606	Homo sapiens	COL2A1		R-HSA-375151
R-HSA-8948216	Collagen chain trimerization	1	44	0.00317254	0.327799	0.355095	2	28	0.00240488	9606	Homo sapiens	COL2A1		R-HSA-8944266;R-HSA-8944263
R-HSA-8875878	MET promotes cell motility	1	45	0.00324465	0.33385	0.355095	1	12	0.00103066	9606	Homo sapiens	COL2A1		R-HSA-8874079
R-HSA-1500931	Cell-Cell communication	2	133	0.00958973	0.337253	0.355095	3	60	0.00515331	9606	Homo sapiens	KRT19;CDH11		R-HSA-446077;R-HSA-419002;R-HSA-419001
R-HSA-975576	N-glycan antennae elongation in the medial/trans-Golgi	1	46	0.00331675	0.339846	0.355095	1	14	0.00120244	9606	Homo sapiens	MGAT3		R-HSA-975926
R-HSA-3000480	Scavenging by Class A Receptors	1	48	0.00346096	0.351679	0.355095	2	10	0.000858885	9606	Homo sapiens	SCARA5		R-HSA-2187266;R-HSA-2299677
R-HSA-69231	Cyclin D associated events in G1	1	48	0.00346096	0.351679	0.355095	2	14	0.00120244	9606	Homo sapiens	CDKN2C		R-HSA-182594;R-HSA-8941895
R-HSA-69236	G1 Phase	1	48	0.00346096	0.351679	0.355095	2	14	0.00120244	9606	Homo sapiens	CDKN2C		R-HSA-182594;R-HSA-8941895
R-HSA-6809371	Formation of the cornified envelope	2	138	0.00995025	0.353571	0.355095	8	27	0.00231899	9606	Homo sapiens	KRT19		R-HSA-6810357;R-HSA-6814387;R-HSA-6811539;R-HSA-8942224;R-HSA-6814734;R-HSA-6814764;R-HSA-6814298;R-HSA-6810937
R-HSA-1852241	Organelle biogenesis and maintenance	4	334	0.0240825	0.355095	0.355095	17	86	0.00738641	9606	Homo sapiens	ATP8;PLK1;ATP6;IFT57		R-HSA-5624949;R-HSA-5626228;R-HSA-8949580;R-HSA-5625424;R-HSA-5626227;R-HSA-5625426;R-HSA-5617820;R-HSA-5626681;R-HSA-5624952;R-HSA-5617816;R-HSA-5638009;R-HSA-5617825;R-HSA-5625421;R-HSA-5626220;R-HSA-5626223;R-HSA-5625416;R-HSA-5626699
R-HSA-194840	Rho GTPase cycle	2	144	0.0103829	0.372968	0.372968	5	5	0.000429443	9606	Homo sapiens	PREX1;RHOJ		R-HSA-194913;R-HSA-194854;R-HSA-194922;R-HSA-195146;R-HSA-194894
R-HSA-1638074	Keratan sulfate/keratin metabolism	1	52	0.00374937	0.374718	0.374718	1	15	0.00128833	9606	Homo sapiens	B3GNT7		R-HSA-2025724
R-HSA-75153	Apoptotic execution phase	1	54	0.00389358	0.38593	0.38593	1	57	0.00489565	9606	Homo sapiens	LMNB1		R-HSA-264871
R-HSA-174113	SCF-beta-TrCP mediated degradation of Emi1	1	55	0.00396568	0.391462	0.391462	3	3	0.000257666	9606	Homo sapiens	CDC20		R-HSA-174209;R-HSA-174203;R-HSA-174159
R-HSA-5620924	Intraflagellar transport	1	55	0.00396568	0.391462	0.391462	8	12	0.00103066	9606	Homo sapiens	IFT57		R-HSA-5624949;R-HSA-5617825;R-HSA-5625424;R-HSA-5625426;R-HSA-5625421;R-HSA-5617820;R-HSA-5624952;R-HSA-5625416
R-HSA-8854050	FBXL7 down-regulates AURKA during mitotic entry and in early mitosis	1	55	0.00396568	0.391462	0.391462	3	6	0.000515331	9606	Homo sapiens	AURKA		R-HSA-8854044;R-HSA-8854041;R-HSA-8853496
R-HSA-70268	Pyruvate metabolism	1	57	0.00410989	0.402376	0.402376	3	15	0.00128833	9606	Homo sapiens	PDHB		R-HSA-71397;R-HSA-203946;R-HSA-204169
R-HSA-8856828	Clathrin-mediated endocytosis	2	155	0.011176	0.407901	0.407901	17	34	0.00292021	9606	Homo sapiens	WNT5A;PACSIN1		R-HSA-8868071;R-HSA-8868230;R-HSA-8867756;R-HSA-8868236;R-HSA-8868651;R-HSA-8866283;R-HSA-8867754;R-HSA-8868072;R-HSA-8868648;R-HSA-8868661;R-HSA-8868660;R-HSA-8868659;R-HSA-8868658;R-HSA-8869438;R-HSA-8866269;R-HSA-8871194;R-HSA-8871193
R-HSA-156580	Phase II - Conjugation of compounds	3	258	0.0186026	0.411471	0.411471	6	70	0.0060122	9606	Homo sapiens	SULT2B1;PAPSS1		R-HSA-176609;R-HSA-176631;R-HSA-176517;R-HSA-174389;R-HSA-174392;R-HSA-176494
R-HSA-197264	Nicotinamide salvaging	1	59	0.00425409	0.413097	0.413097	1	12	0.00103066	9606	Homo sapiens	COX2		R-HSA-2309773
R-HSA-73887	Death Receptor Signalling	2	157	0.0113202	0.414155	0.414155	2	90	0.00772997	9606	Homo sapiens	PREX1;SORCS3		R-HSA-193642;R-HSA-205039
R-HSA-4085001	Sialic acid metabolism	1	60	0.0043262	0.418386	0.418386	1	20	0.00171777	9606	Homo sapiens	ST3GAL5		R-HSA-4084984
R-HSA-5339562	Uptake and actions of bacterial toxins	1	60	0.0043262	0.418386	0.418386	1	65	0.00558275	9606	Homo sapiens	MAP2K6		R-HSA-5211405
R-HSA-3000171	Non-integrin membrane-ECM interactions	1	61	0.0043983	0.423627	0.423627	2	22	0.00188955	9606	Homo sapiens	COL2A1		R-HSA-2465890;R-HSA-2327738
R-HSA-1221632	Meiotic synapsis	1	62	0.0044704	0.428821	0.428821	1	6	0.000515331	9606	Homo sapiens	LMNB1		R-HSA-912408
R-HSA-112043	PLC beta mediated events	1	62	0.0044704	0.428821	0.428821	2	23	0.00197544	9606	Homo sapiens	PDE1A		R-HSA-111955;R-HSA-111956
R-HSA-193648	NRAGE signals death through JNK	1	63	0.0045425	0.433969	0.433969	1	7	0.00060122	9606	Homo sapiens	PREX1		R-HSA-205039
R-HSA-112040	G-protein mediated events	1	63	0.0045425	0.433969	0.433969	2	32	0.00274843	9606	Homo sapiens	PDE1A		R-HSA-111955;R-HSA-111956
R-HSA-3858494	Beta-catenin independent WNT signaling	2	165	0.011897	0.438837	0.438837	19	51	0.00438031	9606	Homo sapiens	WNT5A;FZD8		R-HSA-3858491;R-HSA-5099886;R-HSA-5140747;R-HSA-4551555;R-HSA-5138441;R-HSA-3858482;R-HSA-3858480;R-HSA-5140741;R-HSA-5138432;R-HSA-5138433;R-HSA-5138459;R-HSA-5099899;R-HSA-4551571;R-HSA-4551570;R-HSA-3965444;R-HSA-3965446;R-HSA-3965447;R-HSA-3965441;R-HSA-4608825
R-HSA-174154	APC/C:Cdc20 mediated degradation of Securin	1	67	0.00483092	0.454105	0.454105	3	3	0.000257666	9606	Homo sapiens	CDC20		R-HSA-174144;R-HSA-174202;R-HSA-174121
R-HSA-2022090	Assembly of collagen fibrils and other multimeric structures	1	67	0.00483092	0.454105	0.454105	6	26	0.0022331	9606	Homo sapiens	COL2A1		R-HSA-2213201;R-HSA-2213205;R-HSA-2299620;R-HSA-2213208;R-HSA-2213210;R-HSA-1474266
R-HSA-983189	Kinesins	1	67	0.00483092	0.454105	0.454105	3	14	0.00120244	9606	Homo sapiens	KIF20A		R-HSA-983259;R-HSA-984648;R-HSA-983266
R-HSA-421270	Cell-cell junction organization	1	67	0.00483092	0.454105	0.454105	2	21	0.00180366	9606	Homo sapiens	CDH11		R-HSA-419002;R-HSA-419001
R-HSA-112314	Neurotransmitter receptors and postsynaptic signal transmission	2	171	0.0123297	0.456978	0.456978	2	56	0.00480976	9606	Homo sapiens	GABRA2;GABRB2		R-HSA-975340;R-HSA-8856398
R-HSA-6802952	Signaling by BRAF and RAF fusions	1	68	0.00490302	0.459027	0.459027	5	5	0.000429443	9606	Homo sapiens	PAPSS1		R-HSA-6802935;R-HSA-6802934;R-HSA-6802933;R-HSA-6802932;R-HSA-6802927
R-HSA-8873719	RAB geranylgeranylation	1	68	0.00490302	0.459027	0.459027	1	5	0.000429443	9606	Homo sapiens	MXD3		R-HSA-8870469
R-HSA-1442490	Collagen degradation	1	69	0.00497512	0.463904	0.463904	6	34	0.00292021	9606	Homo sapiens	COL2A1		R-HSA-1474196;R-HSA-1474197;R-HSA-1454757;R-HSA-1564179;R-HSA-2537499;R-HSA-2473594
R-HSA-450294	MAP kinase activation	1	69	0.00497512	0.463904	0.463904	3	32	0.00274843	9606	Homo sapiens	MAP2K6		R-HSA-450333;R-HSA-450346;R-HSA-450296
R-HSA-168643	Nucleotide-binding domain, leucine rich repeat containing receptor (NLR) signaling pathways	1	69	0.00497512	0.463904	0.463904	2	45	0.00386498	9606	Homo sapiens	MAP2K6		R-HSA-727819;R-HSA-1247960
R-HSA-375165	NCAM signaling for neurite out-growth	1	69	0.00497512	0.463904	0.463904	1	23	0.00197544	9606	Homo sapiens	COL2A1		R-HSA-375151
R-HSA-186797	Signaling by PDGF	1	69	0.00497512	0.463904	0.463904	1	28	0.00240488	9606	Homo sapiens	COL2A1		R-HSA-382054
R-HSA-380284	Loss of proteins required for interphase microtubule organization from the centrosome	1	71	0.00511933	0.473529	0.473529	3	3	0.000257666	9606	Homo sapiens	PLK1		R-HSA-380294;R-HSA-380272;R-HSA-380303
R-HSA-380259	Loss of Nlp from mitotic centrosomes	1	71	0.00511933	0.473529	0.473529	2	2	0.000171777	9606	Homo sapiens	PLK1		R-HSA-380272;R-HSA-380303
R-HSA-936837	Ion transport by P-type ATPases	1	71	0.00511933	0.473529	0.473529	2	14	0.00120244	9606	Homo sapiens	ATP8A1		R-HSA-947591;R-HSA-939763
R-HSA-2559586	DNA Damage/Telomere Stress Induced Senescence	1	71	0.00511933	0.473529	0.473529	1	18	0.00154599	9606	Homo sapiens	LMNB1		R-HSA-4647594
R-HSA-211976	Endogenous sterols	1	71	0.00511933	0.473529	0.473529	1	19	0.00163188	9606	Homo sapiens	CYP1B1		R-HSA-211951
R-HSA-5633007	Regulation of TP53 Activity	2	178	0.0128344	0.477715	0.477715	2	98	0.00841707	9606	Homo sapiens	AURKA;MAP2K6		R-HSA-6805103;R-HSA-8877691
R-HSA-174184	Cdc20:Phospho-APC/C mediated degradation of Cyclin A	1	72	0.00519143	0.478278	0.478278	3	3	0.000257666	9606	Homo sapiens	CDC20		R-HSA-174171;R-HSA-174104;R-HSA-174255
R-HSA-5362517	Signaling by Retinoic Acid	1	72	0.00519143	0.478278	0.478278	1	21	0.00180366	9606	Homo sapiens	PDHB		R-HSA-203946
R-HSA-179419	APC:Cdc20 mediated degradation of cell cycle proteins prior to satisfation of the cell cycle checkpoint	1	73	0.00526354	0.482983	0.482983	6	6	0.000515331	9606	Homo sapiens	CDC20		R-HSA-179410;R-HSA-174171;R-HSA-174104;R-HSA-179417;R-HSA-174255;R-HSA-179421
R-HSA-389661	Glyoxylate metabolism and glycine degradation	1	73	0.00526354	0.482983	0.482983	1	23	0.00197544	9606	Homo sapiens	PDHB		R-HSA-6792572
R-HSA-1793185	Chondroitin sulfate/dermatan sulfate metabolism	1	73	0.00526354	0.482983	0.482983	1	24	0.00206132	9606	Homo sapiens	CHST9		R-HSA-1971483
R-HSA-1650814	Collagen biosynthesis and modifying enzymes	1	76	0.00547985	0.496849	0.496849	22	51	0.00438031	9606	Homo sapiens	COL2A1		R-HSA-8948232;R-HSA-1650808;R-HSA-8944266;R-HSA-2002428;R-HSA-2002460;R-HSA-8948234;R-HSA-2022073;R-HSA-8948224;R-HSA-8948226;R-HSA-2089971;R-HSA-8948228;R-HSA-1981104;R-HSA-8948230;R-HSA-8944263;R-HSA-8948231;R-HSA-8948219;R-HSA-2002440;R-HSA-8948222;R-HSA-1981128;R-HSA-1980233;R-HSA-1981157;R-HSA-1981120
R-HSA-448424	Interleukin-17 signaling	1	77	0.00555195	0.501388	0.501388	3	35	0.0030061	9606	Homo sapiens	MAP2K6		R-HSA-450333;R-HSA-450346;R-HSA-450296
R-HSA-3000178	ECM proteoglycans	1	79	0.00569616	0.510345	0.510345	4	23	0.00197544	9606	Homo sapiens	COL2A1		R-HSA-2396370;R-HSA-2327909;R-HSA-2424252;R-HSA-2466238
R-HSA-4086398	Ca2+ pathway	1	80	0.00576826	0.514764	0.514764	4	27	0.00231899	9606	Homo sapiens	WNT5A		R-HSA-3965444;R-HSA-3965446;R-HSA-3965447;R-HSA-3965441
R-HSA-204998	Cell death signalling via NRAGE, NRIF and NADE	1	80	0.00576826	0.514764	0.514764	1	17	0.0014601	9606	Homo sapiens	PREX1		R-HSA-205039
R-HSA-380270	Recruitment of mitotic centrosome proteins and complexes	1	81	0.00584036	0.519143	0.519143	3	3	0.000257666	9606	Homo sapiens	PLK1		R-HSA-380311;R-HSA-380455;R-HSA-380283
R-HSA-69473	G2/M DNA damage checkpoint	1	81	0.00584036	0.519143	0.519143	1	12	0.00103066	9606	Homo sapiens	CCNB1		R-HSA-170070
R-HSA-70614	Amino acid synthesis and interconversion (transamination)	1	82	0.00591247	0.523483	0.523483	1	35	0.0030061	9606	Homo sapiens	FOLH1		R-HSA-5693783
R-HSA-5579029	Metabolic disorders of biological oxidation enzymes	1	82	0.00591247	0.523483	0.523483	1	39	0.00334965	9606	Homo sapiens	CYP1B1		R-HSA-5605147
R-HSA-380287	Centrosome maturation	1	83	0.00598457	0.527784	0.527784	6	6	0.000515331	9606	Homo sapiens	PLK1		R-HSA-380311;R-HSA-380455;R-HSA-380294;R-HSA-380272;R-HSA-380303;R-HSA-380283
R-HSA-216083	Integrin cell surface interactions	1	86	0.00620088	0.540457	0.540457	2	54	0.00463798	9606	Homo sapiens	COL2A1		R-HSA-4084910;R-HSA-216043
R-HSA-196807	Nicotinate metabolism	1	86	0.00620088	0.540457	0.540457	1	29	0.00249077	9606	Homo sapiens	COX2		R-HSA-2309773
R-HSA-983168	Antigen processing: Ubiquitination & Proteasome degradation	3	315	0.0227125	0.542079	0.542079	4	9	0.000772997	9606	Homo sapiens	CDC20;FBXO2;CCNF		R-HSA-983147;R-HSA-983157;R-HSA-983156;R-HSA-983140
R-HSA-6802957	Oncogenic MAPK signaling	1	87	0.00627298	0.544606	0.544606	5	34	0.00292021	9606	Homo sapiens	PAPSS1		R-HSA-6802935;R-HSA-6802934;R-HSA-6802933;R-HSA-6802932;R-HSA-6802927
R-HSA-6806834	Signaling by MET	1	87	0.00627298	0.544606	0.544606	1	49	0.00420854	9606	Homo sapiens	COL2A1		R-HSA-8874079
R-HSA-211859	Biological oxidations	5	547	0.0394405	0.550484	0.550484	9	186	0.0159753	9606	Homo sapiens	SULT2B1;CYP1B1;COX1;PAPSS1		R-HSA-140355;R-HSA-176609;R-HSA-176631;R-HSA-140359;R-HSA-176517;R-HSA-174389;R-HSA-174392;R-HSA-176494;R-HSA-211951
R-HSA-2559582	Senescence-Associated Secretory Phenotype (SASP)	1	89	0.00641719	0.552793	0.552793	1	22	0.00188955	9606	Homo sapiens	CDKN2C		R-HSA-182594
R-HSA-9018677	Biosynthesis of DHA-derived SPMs	1	89	0.00641719	0.552793	0.552793	1	58	0.00498153	9606	Homo sapiens	COX2		R-HSA-9020261
R-HSA-5617833	Cilium Assembly	2	207	0.0149254	0.558296	0.558296	16	50	0.00429443	9606	Homo sapiens	PLK1;IFT57		R-HSA-5624949;R-HSA-5626228;R-HSA-5625424;R-HSA-5626227;R-HSA-5625426;R-HSA-5617820;R-HSA-5626681;R-HSA-5624952;R-HSA-5617816;R-HSA-5638009;R-HSA-5617825;R-HSA-5625421;R-HSA-5626220;R-HSA-5626223;R-HSA-5625416;R-HSA-5626699
R-HSA-416482	G alpha (12/13) signalling events	1	92	0.0066335	0.5648	0.5648	1	12	0.00103066	9606	Homo sapiens	PREX1		R-HSA-419166
R-HSA-1500620	Meiosis	1	92	0.0066335	0.5648	0.5648	1	15	0.00128833	9606	Homo sapiens	LMNB1		R-HSA-912408
R-HSA-6785807	Interleukin-4 and Interleukin-13 signaling	2	211	0.0152138	0.568703	0.568703	1	46	0.00395087	9606	Homo sapiens	COX2		R-HSA-6790029
R-HSA-975871	MyD88 cascade initiated on plasma membrane	1	94	0.00677771	0.572627	0.572627	3	57	0.00489565	9606	Homo sapiens	MAP2K6		R-HSA-450333;R-HSA-450346;R-HSA-450296
R-HSA-168176	Toll Like Receptor 5 (TLR5) Cascade	1	94	0.00677771	0.572627	0.572627	3	58	0.00498153	9606	Homo sapiens	MAP2K6		R-HSA-450333;R-HSA-450346;R-HSA-450296
R-HSA-168142	Toll Like Receptor 10 (TLR10) Cascade	1	94	0.00677771	0.572627	0.572627	3	58	0.00498153	9606	Homo sapiens	MAP2K6		R-HSA-450333;R-HSA-450346;R-HSA-450296
R-HSA-195721	Signaling by WNT	3	330	0.0237941	0.573671	0.573671	36	156	0.0133986	9606	Homo sapiens	WNT5A;FZD8;LGR5		R-HSA-3858491;R-HSA-5140747;R-HSA-4551555;R-HSA-5138441;R-HSA-5323545;R-HSA-3858482;R-HSA-3858480;R-HSA-5140741;R-HSA-3781941;R-HSA-5138432;R-HSA-3781943;R-HSA-5138433;R-HSA-3247840;R-HSA-3247843;R-HSA-3238691;R-HSA-4641236;R-HSA-5138459;R-HSA-3247844;R-HSA-4551571;R-HSA-3238694;R-HSA-4551570;R-HSA-4641246;R-HSA-5099886;R-HSA-3769370;R-HSA-4641253;R-HSA-4641249;R-HSA-3247837;R-HSA-1458875;R-HSA-4…
R-HSA-6804756	Regulation of TP53 Activity through Phosphorylation	1	95	0.00684981	0.576487	0.576487	1	26	0.0022331	9606	Homo sapiens	AURKA		R-HSA-6805103
R-HSA-380320	Recruitment of NuMA to mitotic centrosomes	1	96	0.00692191	0.580314	0.580314	2	2	0.000171777	9606	Homo sapiens	PLK1		R-HSA-380316;R-HSA-380508
R-HSA-71406	Pyruvate metabolism and Citric Acid (TCA) cycle	1	98	0.00706612	0.587863	0.587863	3	36	0.00309199	9606	Homo sapiens	PDHB		R-HSA-71397;R-HSA-203946;R-HSA-204169
R-HSA-5620912	Anchoring of the basal body to the plasma membrane	1	99	0.00713822	0.591588	0.591588	8	9	0.000772997	9606	Homo sapiens	PLK1		R-HSA-5626228;R-HSA-5626227;R-HSA-5626220;R-HSA-5626223;R-HSA-5626681;R-HSA-5617816;R-HSA-5626699;R-HSA-5638009
R-HSA-975138	TRAF6 mediated induction of NFkB and MAP kinases upon TLR7/8 or 9 activation	1	103	0.00742663	0.606153	0.606153	3	47	0.00403676	9606	Homo sapiens	MAP2K6		R-HSA-450333;R-HSA-450346;R-HSA-450296
R-HSA-1296071	Potassium Channels	1	103	0.00742663	0.606153	0.606153	1	17	0.0014601	9606	Homo sapiens	KCNH6		R-HSA-1296127
R-HSA-6805567	Keratinization	2	226	0.0162953	0.606157	0.606157	15	34	0.00292021	9606	Homo sapiens	KRT19		R-HSA-6806629;R-HSA-6805573;R-HSA-6814734;R-HSA-6814764;R-HSA-6805546;R-HSA-6806613;R-HSA-6810357;R-HSA-6814387;R-HSA-6811539;R-HSA-6806610;R-HSA-6809393;R-HSA-6809663;R-HSA-8942224;R-HSA-6814298;R-HSA-6810937
R-HSA-1474290	Collagen formation	1	104	0.00749874	0.609714	0.609714	28	77	0.00661342	9606	Homo sapiens	COL2A1		R-HSA-8948232;R-HSA-8944266;R-HSA-2002460;R-HSA-8948234;R-HSA-2299620;R-HSA-8948224;R-HSA-8948226;R-HSA-1474266;R-HSA-8948228;R-HSA-8948230;R-HSA-8944263;R-HSA-8948231;R-HSA-2002440;R-HSA-1981128;R-HSA-1980233;R-HSA-1981120;R-HSA-1650808;R-HSA-2002428;R-HSA-2022073;R-HSA-2089971;R-HSA-1981104;R-HSA-2213201;R-HSA-8948219;R-HSA-2213205;R-HSA-8948222;R-HSA-2213208;R-HSA-2213210;R-HSA-1981157
R-HSA-975155	MyD88 dependent cascade initiated on endosome	1	104	0.00749874	0.609714	0.609714	3	62	0.00532509	9606	Homo sapiens	MAP2K6		R-HSA-450333;R-HSA-450346;R-HSA-450296
R-HSA-168181	Toll Like Receptor 7/8 (TLR7/8) Cascade	1	104	0.00749874	0.609714	0.609714	3	63	0.00541098	9606	Homo sapiens	MAP2K6		R-HSA-450333;R-HSA-450346;R-HSA-450296
R-HSA-9006931	Signaling by Nuclear Receptors	2	230	0.0165837	0.615724	0.615724	15	93	0.00798763	9606	Homo sapiens	FOXA1;PDHB		R-HSA-9009065;R-HSA-9018497;R-HSA-9009536;R-HSA-203946;R-HSA-9018499;R-HSA-9009378;R-HSA-9009541;R-HSA-9009371;R-HSA-9009533;R-HSA-9018494;R-HSA-9023859;R-HSA-9038163;R-HSA-9023861;R-HSA-9023860;R-HSA-9009526
R-HSA-6811434	COPI-dependent Golgi-to-ER retrograde traffic	1	106	0.00764294	0.616738	0.616738	2	11	0.000944774	9606	Homo sapiens	KIF20A		R-HSA-6811426;R-HSA-6811423
R-HSA-168164	Toll Like Receptor 3 (TLR3) Cascade	1	107	0.00771505	0.620204	0.620204	3	60	0.00515331	9606	Homo sapiens	MAP2K6		R-HSA-450333;R-HSA-450346;R-HSA-450296
R-HSA-937061	TRIF(TICAM1)-mediated TLR4 signaling	1	108	0.00778715	0.623638	0.623638	3	57	0.00489565	9606	Homo sapiens	MAP2K6		R-HSA-450333;R-HSA-450346;R-HSA-450296
R-HSA-166166	MyD88-independent TLR4 cascade	1	108	0.00778715	0.623638	0.623638	3	59	0.00506742	9606	Homo sapiens	MAP2K6		R-HSA-450333;R-HSA-450346;R-HSA-450296
R-HSA-168138	Toll Like Receptor 9 (TLR9) Cascade	1	108	0.00778715	0.623638	0.623638	3	66	0.00566864	9606	Homo sapiens	MAP2K6		R-HSA-450333;R-HSA-450346;R-HSA-450296
R-HSA-8957275	Post-translational protein phosphorylation	1	109	0.00785925	0.627041	0.627041	1	1	8.58885e-05	9606	Homo sapiens	FSTL1		R-HSA-8952289
R-HSA-8856825	Cargo recognition for clathrin-mediated endocytosis	1	109	0.00785925	0.627041	0.627041	2	14	0.00120244	9606	Homo sapiens	WNT5A		R-HSA-8866269;R-HSA-8866283
R-HSA-9020702	Interleukin-1 signaling	1	109	0.00785925	0.627041	0.627041	1	45	0.00386498	9606	Homo sapiens	MAP2K6		R-HSA-727819
R-HSA-166058	MyD88:Mal cascade initiated on plasma membrane	1	110	0.00793136	0.630414	0.630414	3	63	0.00541098	9606	Homo sapiens	MAP2K6		R-HSA-450333;R-HSA-450346;R-HSA-450296
R-HSA-168188	Toll Like Receptor TLR6:TLR2 Cascade	1	110	0.00793136	0.630414	0.630414	3	65	0.00558275	9606	Homo sapiens	MAP2K6		R-HSA-450333;R-HSA-450346;R-HSA-450296
R-HSA-1483255	PI Metabolism	1	112	0.00807556	0.637069	0.637069	1	89	0.00764408	9606	Homo sapiens	TNFAIP8L1		R-HSA-8874470
R-HSA-168179	Toll Like Receptor TLR1:TLR2 Cascade	1	113	0.00814767	0.640352	0.640352	3	65	0.00558275	9606	Homo sapiens	MAP2K6		R-HSA-450333;R-HSA-450346;R-HSA-450296
R-HSA-181438	Toll Like Receptor 2 (TLR2) Cascade	1	113	0.00814767	0.640352	0.640352	3	67	0.00575453	9606	Homo sapiens	MAP2K6		R-HSA-450333;R-HSA-450346;R-HSA-450296
R-HSA-8951664	Neddylation	2	241	0.0173769	0.641121	0.641121	6	31	0.00266254	9606	Homo sapiens	FBXO2;CCNF		R-HSA-8956040;R-HSA-8956200;R-HSA-8955289;R-HSA-8955241;R-HSA-8952618;R-HSA-8952620
R-HSA-418346	Platelet homeostasis	1	118	0.00850818	0.65633	0.65633	1	30	0.00257666	9606	Homo sapiens	PDE1A		R-HSA-418456
R-HSA-5610787	Hedgehog 'off' state	1	123	0.0088687	0.671603	0.671603	1	32	0.00274843	9606	Homo sapiens	IFT57		R-HSA-5610767
R-HSA-2980736	Peptide hormone metabolism	1	125	0.00901291	0.677522	0.677522	3	60	0.00515331	9606	Homo sapiens	ACE		R-HSA-2022398;R-HSA-2065355;R-HSA-2022405
R-HSA-381426	Regulation of Insulin-like Growth Factor (IGF) transport and uptake by Insulin-like Growth Factor Binding Proteins (IGFBPs)	1	127	0.00915711	0.683335	0.683335	1	14	0.00120244	9606	Homo sapiens	FSTL1		R-HSA-8952289
R-HSA-597592	Post-translational protein modification	13	1589	0.114572	0.685803	0.685803	20	521	0.0447479	9606	Homo sapiens	TOP2A;FBXO2;CCNF;CDCA8;FSTL1;AURKA;CDC20;B3GNT7;MGAT3;ST3GAL5;CHST4;LARGE2;MXD3		R-HSA-8956040;R-HSA-8956200;R-HSA-4641350;R-HSA-8955241;R-HSA-8952618;R-HSA-5228525;R-HSA-5617143;R-HSA-8870469;R-HSA-8952620;R-HSA-4084984;R-HSA-5617138;R-HSA-5696958;R-HSA-8952289;R-HSA-4655404;R-HSA-8955289;R-HSA-914010;R-HSA-975926;R-HSA-4641342;R-HSA-6786012;R-HSA-4655355
R-HSA-449147	Signaling by Interleukins	5	640	0.0461461	0.688756	0.688756	6	491	0.0421713	9606	Homo sapiens	COX2;LMNB1;MAP2K6		R-HSA-727819;R-HSA-8950681;R-HSA-6790029;R-HSA-450333;R-HSA-450346;R-HSA-450296
R-HSA-446219	Synthesis of substrates in N-glycan biosythesis	1	131	0.00944553	0.694652	0.694652	1	48	0.00412265	9606	Homo sapiens	ST3GAL5		R-HSA-4084984
R-HSA-194138	Signaling by VEGF	1	134	0.00966184	0.702875	0.702875	1	83	0.00712875	9606	Homo sapiens	FLT4		R-HSA-194308
R-HSA-71387	Metabolism of carbohydrates	3	413	0.0297786	0.722682	0.722682	4	213	0.0182943	9606	Homo sapiens	CHST9;B3GNT7;PAPSS1		R-HSA-2025724;R-HSA-1971483;R-HSA-174389;R-HSA-174392
R-HSA-212165	Epigenetic regulation of gene expression	1	143	0.0103108	0.726249	0.726249	2	34	0.00292021	9606	Homo sapiens	PHF19		R-HSA-212263;R-HSA-212252
R-HSA-166016	Toll Like Receptor 4 (TLR4) Cascade	1	144	0.0103829	0.728731	0.728731	3	94	0.00807352	9606	Homo sapiens	MAP2K6		R-HSA-450333;R-HSA-450346;R-HSA-450296
R-HSA-8878166	Transcriptional regulation by RUNX2	1	144	0.0103829	0.728731	0.728731	1	84	0.00721464	9606	Homo sapiens	CCNB1		R-HSA-9009282
R-HSA-112315	Transmission across Chemical Synapses	2	288	0.0207657	0.735023	0.735023	2	108	0.00927596	9606	Homo sapiens	GABRA2;GABRB2		R-HSA-975340;R-HSA-8856398
R-HSA-8856688	Golgi-to-ER retrograde transport	1	147	0.0105992	0.736043	0.736043	2	18	0.00154599	9606	Homo sapiens	KIF20A		R-HSA-6811426;R-HSA-6811423
R-HSA-2132295	MHC class II antigen presentation	1	147	0.0105992	0.736043	0.736043	1	26	0.0022331	9606	Homo sapiens	KIF20A		R-HSA-2213248
R-HSA-1474228	Degradation of the extracellular matrix	1	148	0.0106713	0.738437	0.738437	6	105	0.00901829	9606	Homo sapiens	COL2A1		R-HSA-1474196;R-HSA-1474197;R-HSA-1454757;R-HSA-1564179;R-HSA-2537499;R-HSA-2473594
R-HSA-69206	G1/S Transition	1	150	0.0108155	0.74316	0.74316	1	61	0.0052392	9606	Homo sapiens	CCNB1		R-HSA-113638
R-HSA-8978868	Fatty acid metabolism	3	429	0.0309323	0.74626	0.74626	13	217	0.0186378	9606	Homo sapiens	CYP1B1;COX2;COX1		R-HSA-140355;R-HSA-2161890;R-HSA-2161795;R-HSA-140359;R-HSA-2161899;R-HSA-2309773;R-HSA-2309779;R-HSA-2161940;R-HSA-2314678;R-HSA-2161814;R-HSA-2309787;R-HSA-2314686;R-HSA-2161951
R-HSA-9018519	Estrogen-dependent gene expression	1	153	0.0110318	0.750086	0.750086	14	66	0.00566864	9606	Homo sapiens	FOXA1		R-HSA-9009065;R-HSA-9018497;R-HSA-9009536;R-HSA-9018499;R-HSA-9009378;R-HSA-9009541;R-HSA-9009371;R-HSA-9009533;R-HSA-9018494;R-HSA-9023859;R-HSA-9038163;R-HSA-9023861;R-HSA-9023860;R-HSA-9009526
R-HSA-69481	G2/M Checkpoints	1	154	0.0111039	0.752353	0.752353	2	24	0.00206132	9606	Homo sapiens	CCNB1		R-HSA-170070;R-HSA-170055
R-HSA-211945	Phase I - Functionalization of compounds	2	300	0.021631	0.755406	0.755406	3	99	0.00850296	9606	Homo sapiens	CYP1B1;COX1		R-HSA-140355;R-HSA-140359;R-HSA-211951
R-HSA-9018678	Biosynthesis of specialized proresolving mediators (SPMs)	1	159	0.0114644	0.763387	0.763387	7	124	0.0106502	9606	Homo sapiens	COX2		R-HSA-9026408;R-HSA-9027627;R-HSA-9027532;R-HSA-9028255;R-HSA-9018880;R-HSA-9020261;R-HSA-9027607
R-HSA-446193	Biosynthesis of the N-glycan precursor (dolichol lipid-linked oligosaccharide, LLO) and transfer to a nascent protein	1	159	0.0114644	0.763387	0.763387	1	62	0.00532509	9606	Homo sapiens	ST3GAL5		R-HSA-4084984
R-HSA-8939211	ESR-mediated signaling	1	160	0.0115365	0.765535	0.765535	14	72	0.00618397	9606	Homo sapiens	FOXA1		R-HSA-9009065;R-HSA-9018497;R-HSA-9009536;R-HSA-9018499;R-HSA-9009378;R-HSA-9009541;R-HSA-9009371;R-HSA-9009533;R-HSA-9018494;R-HSA-9023859;R-HSA-9038163;R-HSA-9023861;R-HSA-9023860;R-HSA-9009526
R-HSA-446652	Interleukin-1 family signaling	1	162	0.0116807	0.769772	0.769772	1	78	0.0066993	9606	Homo sapiens	MAP2K6		R-HSA-727819
R-HSA-425393	Transport of inorganic cations/anions and amino acids/oligopeptides	1	165	0.011897	0.775986	0.775986	1	75	0.00644164	9606	Homo sapiens	SLC24A3		R-HSA-425678
R-HSA-2173782	Binding and Uptake of Ligands by Scavenger Receptors	1	167	0.0120412	0.780036	0.780036	2	33	0.00283432	9606	Homo sapiens	SCARA5		R-HSA-2187266;R-HSA-2299677
R-HSA-5358351	Signaling by Hedgehog	1	167	0.0120412	0.780036	0.780036	1	82	0.00704286	9606	Homo sapiens	IFT57		R-HSA-5610767
R-HSA-983169	Class I MHC mediated antigen processing & presentation	3	464	0.0334559	0.792306	0.792306	4	48	0.00412265	9606	Homo sapiens	CDC20;FBXO2;CCNF		R-HSA-983147;R-HSA-983157;R-HSA-983156;R-HSA-983140
R-HSA-109581	Apoptosis	1	180	0.0129786	0.804646	0.804646	1	126	0.010822	9606	Homo sapiens	LMNB1		R-HSA-264871
R-HSA-168898	Toll-Like Receptors Cascades	1	183	0.0131949	0.809926	0.809926	3	180	0.0154599	9606	Homo sapiens	MAP2K6		R-HSA-450333;R-HSA-450346;R-HSA-450296
R-HSA-6798695	Neutrophil degranulation	3	480	0.0346096	0.81095	0.81095	4	10	0.000858885	9606	Homo sapiens	ATP8A1;HVCN1;FGL2		R-HSA-6798743;R-HSA-6799350;R-HSA-6798739;R-HSA-6800434
R-HSA-2408522	Selenoamino acid metabolism	1	184	0.013267	0.811654	0.811654	2	33	0.00283432	9606	Homo sapiens	PAPSS1		R-HSA-2408540;R-HSA-2408525
R-HSA-211897	Cytochrome P450 - arranged by substrate type	1	186	0.0134112	0.815064	0.815064	1	62	0.00532509	9606	Homo sapiens	CYP1B1		R-HSA-211951
R-HSA-5357801	Programmed Cell Death	1	188	0.0135554	0.818412	0.818412	1	139	0.0119385	9606	Homo sapiens	LMNB1		R-HSA-264871
R-HSA-983231	Factors involved in megakaryocyte development and platelet production	1	193	0.0139159	0.826523	0.826523	3	43	0.00369321	9606	Homo sapiens	KIF20A		R-HSA-983259;R-HSA-984648;R-HSA-983266
R-HSA-2262752	Cellular responses to stress	3	511	0.0368448	0.843102	0.843102	6	184	0.0158035	9606	Homo sapiens	CDKN2C;MAP2K6;LMNB1		R-HSA-182594;R-HSA-3228469;R-HSA-3238999;R-HSA-450333;R-HSA-4647594;R-HSA-450296
R-HSA-5689880	Ub-specific processing proteases	1	206	0.0148533	0.845967	0.845967	1	40	0.00343554	9606	Homo sapiens	CDC20		R-HSA-5696958
R-HSA-983712	Ion channel transport	1	207	0.0149254	0.847369	0.847369	2	39	0.00334965	9606	Homo sapiens	ATP8A1		R-HSA-947591;R-HSA-939763
R-HSA-6811442	Intra-Golgi and retrograde Golgi-to-ER traffic	1	217	0.0156464	0.860719	0.860719	2	48	0.00412265	9606	Homo sapiens	KIF20A		R-HSA-6811426;R-HSA-6811423
R-HSA-5668914	Diseases of metabolism	1	217	0.0156464	0.860719	0.860719	1	114	0.00979129	9606	Homo sapiens	CYP1B1		R-HSA-5605147
R-HSA-948021	Transport to the Golgi and subsequent modification	1	218	0.0157185	0.861989	0.861989	1	60	0.00515331	9606	Homo sapiens	MGAT3		R-HSA-975926
R-HSA-162582	Signal Transduction	23	3114	0.22453	0.885525	0.885525	84	2100	0.180366	9606	Homo sapiens	FOXA1;PDE1A;FLT4;PLK1;WNT5A;CDCA8;FZD8;PDHB;SORCS3;FSTL1;REEP1;CDC20;GREM2;PREX1;COL2A1;PRC1;RHOJ;PPP1R1B;IFT57;LGR5;DLGAP5		R-HSA-3858491;R-HSA-194308;R-HSA-177284;R-HSA-5666129;R-HSA-3858482;R-HSA-9018497;R-HSA-9009536;R-HSA-3858480;R-HSA-9018499;R-HSA-3781941;R-HSA-9009541;R-HSA-3781943;R-HSA-3238691;R-HSA-4641236;R-HSA-3238694;R-HSA-4641246;R-HSA-9009065;R-HSA-5099886;R-HSA-3769370;R-HSA-9018538;R-HSA-4641253;R-HSA-194854;R-HSA-5666160;R-HSA-4641249;R-HSA-9018542;R-HSA-203946;R-HSA-1458875;R-HSA-5666169;R-HSA-38175…
R-HSA-446203	Asparagine N-linked glycosylation	2	420	0.0302834	0.895016	0.895016	2	143	0.0122821	9606	Homo sapiens	MGAT3;ST3GAL5		R-HSA-4084984;R-HSA-975926
R-HSA-196849	Metabolism of water-soluble vitamins and cofactors	1	252	0.01817	0.89895	0.89895	1	140	0.0120244	9606	Homo sapiens	COX2		R-HSA-2309773
R-HSA-8953897	Cellular responses to external stimuli	3	598	0.0431177	0.909437	0.909437	6	254	0.0218157	9606	Homo sapiens	CDKN2C;MAP2K6;LMNB1		R-HSA-182594;R-HSA-3228469;R-HSA-3238999;R-HSA-450333;R-HSA-4647594;R-HSA-450296
R-HSA-5688426	Deubiquitination	1	288	0.0207657	0.927419	0.927419	1	77	0.00661342	9606	Homo sapiens	CDC20		R-HSA-5696958
R-HSA-5663202	Diseases of signal transduction	2	470	0.0338885	0.927629	0.927629	6	297	0.0255089	9606	Homo sapiens	FZD8;PAPSS1		R-HSA-6802935;R-HSA-6802934;R-HSA-6802933;R-HSA-6802932;R-HSA-6802927;R-HSA-5340587
R-HSA-212436	Generic Transcription Pathway	8	1376	0.0992141	0.936593	0.936593	8	649	0.0557416	9606	Homo sapiens	CCNB1;COX3;COX2;COX1;AURKA;CTGF;MAP2K6		R-HSA-6791235;R-HSA-6803875;R-HSA-8951695;R-HSA-6805103;R-HSA-1989766;R-HSA-9009282;R-HSA-8877691;R-HSA-163214
R-HSA-199991	Membrane Trafficking	3	659	0.047516	0.939629	0.939629	19	218	0.0187237	9606	Homo sapiens	WNT5A;KIF20A;PACSIN1		R-HSA-8868071;R-HSA-8868230;R-HSA-6811426;R-HSA-8867756;R-HSA-8868236;R-HSA-8868651;R-HSA-8866283;R-HSA-8867754;R-HSA-8868072;R-HSA-8868648;R-HSA-8868661;R-HSA-8868660;R-HSA-8868659;R-HSA-8868658;R-HSA-6811423;R-HSA-8869438;R-HSA-8866269;R-HSA-8871194;R-HSA-8871193
R-HSA-71291	Metabolism of amino acids and derivatives	3	660	0.0475881	0.940036	0.940036	4	283	0.0243065	9606	Homo sapiens	FOLH1;PDHB;PAPSS1		R-HSA-5693783;R-HSA-2408540;R-HSA-2408525;R-HSA-6792572
R-HSA-5653656	Vesicle-mediated transport	4	818	0.0589805	0.941125	0.941125	21	251	0.021558	9606	Homo sapiens	SCARA5;WNT5A;KIF20A;PACSIN1		R-HSA-8868071;R-HSA-8868230;R-HSA-2187266;R-HSA-6811426;R-HSA-8867756;R-HSA-8868236;R-HSA-8868651;R-HSA-8866283;R-HSA-8867754;R-HSA-8868072;R-HSA-8868648;R-HSA-8868661;R-HSA-8868660;R-HSA-8868659;R-HSA-8868658;R-HSA-6811423;R-HSA-8869438;R-HSA-8866269;R-HSA-8871194;R-HSA-8871193;R-HSA-2299677
R-HSA-1483257	Phospholipid metabolism	1	315	0.0227125	0.943403	0.943403	1	218	0.0187237	9606	Homo sapiens	TNFAIP8L1		R-HSA-8874470
R-HSA-198933	Immunoregulatory interactions between a Lymphoid and a non-Lymphoid cell	1	316	0.0227846	0.943923	0.943923	1	43	0.00369321	9606	Homo sapiens	COL2A1		R-HSA-5696356
R-HSA-9006934	Signaling by Receptor Tyrosine Kinases	2	518	0.0373495	0.949798	0.949798	3	628	0.053938	9606	Homo sapiens	COL2A1;FLT4		R-HSA-382054;R-HSA-194308;R-HSA-8874079
R-HSA-1474244	Extracellular matrix organization	1	329	0.023722	0.950262	0.950262	43	318	0.0273125	9606	Homo sapiens	COL2A1		R-HSA-8948232;R-HSA-8944266;R-HSA-1474196;R-HSA-2002460;R-HSA-8948234;R-HSA-1474197;R-HSA-1564179;R-HSA-2327909;R-HSA-2299620;R-HSA-2465890;R-HSA-8948224;R-HSA-8948226;R-HSA-1474266;R-HSA-8948228;R-HSA-8948230;R-HSA-8944263;R-HSA-8948231;R-HSA-4084910;R-HSA-2327733;R-HSA-2002440;R-HSA-1981128;R-HSA-1980233;R-HSA-2424252;R-HSA-2327738;R-HSA-2466238;R-HSA-1981120;R-HSA-2473594;R-HSA-1650808;R-HSA-2…
R-HSA-1280218	Adaptive Immune System	5	999	0.0720311	0.951227	0.951227	6	253	0.0217298	9606	Homo sapiens	CDC20;COL2A1;FBXO2;CCNF;KIF20A		R-HSA-2213248;R-HSA-5696356;R-HSA-983147;R-HSA-983157;R-HSA-983156;R-HSA-983140
R-HSA-9006925	Intracellular signaling by second messengers	1	347	0.0250198	0.957881	0.957881	2	104	0.00893241	9606	Homo sapiens	PDE1A		R-HSA-111955;R-HSA-111956
R-HSA-1266738	Developmental Biology	6	1176	0.0847934	0.959013	0.959013	19	484	0.04157	9606	Homo sapiens	KRT19;COL2A1;NKX6-1;MAP2K6		R-HSA-6806629;R-HSA-6805573;R-HSA-6814734;R-HSA-375151;R-HSA-6814764;R-HSA-6805546;R-HSA-448951;R-HSA-6806613;R-HSA-6810357;R-HSA-6814387;R-HSA-6811539;R-HSA-211350;R-HSA-6806610;R-HSA-6809393;R-HSA-6809663;R-HSA-8942224;R-HSA-6814298;R-HSA-6810937;R-HSA-210780
R-HSA-418594	G alpha (i) signalling events	2	556	0.0400894	0.962617	0.962617	9	147	0.0126256	9606	Homo sapiens	PDE1A;PPP1R1B		R-HSA-111955;R-HSA-180038;R-HSA-111956;R-HSA-177284;R-HSA-201787;R-HSA-177275;R-HSA-180073;R-HSA-201790;R-HSA-180047
R-HSA-1280215	Cytokine Signaling in Immune system	5	1051	0.0757805	0.964339	0.964339	6	624	0.0535944	9606	Homo sapiens	COX2;LMNB1;MAP2K6		R-HSA-727819;R-HSA-8950681;R-HSA-6790029;R-HSA-450333;R-HSA-450346;R-HSA-450296
R-HSA-73857	RNA Polymerase II Transcription	8	1515	0.109236	0.96921	0.96921	8	708	0.0608091	9606	Homo sapiens	CCNB1;COX3;COX2;COX1;AURKA;CTGF;MAP2K6		R-HSA-6791235;R-HSA-6803875;R-HSA-8951695;R-HSA-6805103;R-HSA-1989766;R-HSA-9009282;R-HSA-8877691;R-HSA-163214
R-HSA-196854	Metabolism of vitamins and cofactors	1	381	0.0274713	0.969253	0.969253	1	201	0.0172636	9606	Homo sapiens	COX2		R-HSA-2309773
R-HSA-74160	Gene expression (Transcription)	9	1674	0.120701	0.972048	0.972048	10	819	0.0703427	9606	Homo sapiens	CCNB1;COX3;COX2;COX1;AURKA;CTGF;MAP2K6;PHF19		R-HSA-6791235;R-HSA-212263;R-HSA-6803875;R-HSA-8951695;R-HSA-6805103;R-HSA-1989766;R-HSA-9009282;R-HSA-8877691;R-HSA-163214;R-HSA-212252
R-HSA-500792	GPCR ligand binding	2	593	0.0427572	0.972061	0.972061	1	170	0.014601	9606	Homo sapiens	WNT5A;FZD8		R-HSA-201708
R-HSA-418555	G alpha (s) signalling events	2	602	0.0434062	0.973986	0.973986	2	14	0.00120244	9606	Homo sapiens	REEP1;PDE1A		R-HSA-381750;R-HSA-418553
R-HSA-425407	SLC-mediated transmembrane transport	1	412	0.0297065	0.976938	0.976938	1	184	0.0158035	9606	Homo sapiens	SLC24A3		R-HSA-425678
R-HSA-381753	Olfactory Signaling Pathway	1	432	0.0311486	0.980851	0.980851	1	2	0.000171777	9606	Homo sapiens	REEP1		R-HSA-381750
R-HSA-392499	Metabolism of proteins	14	2432	0.175355	0.98096	0.98096	23	916	0.0786739	9606	Homo sapiens	TOP2A;ACE;FBXO2;CCNF;CDCA8;FSTL1;AURKA;CDC20;B3GNT7;MGAT3;ST3GAL5;CHST4;LARGE2;MXD3		R-HSA-8956040;R-HSA-8956200;R-HSA-4641350;R-HSA-2022398;R-HSA-8955241;R-HSA-8952618;R-HSA-5228525;R-HSA-5617143;R-HSA-8870469;R-HSA-8952620;R-HSA-4084984;R-HSA-5617138;R-HSA-5696958;R-HSA-8952289;R-HSA-4655404;R-HSA-8955289;R-HSA-2065355;R-HSA-914010;R-HSA-975926;R-HSA-4641342;R-HSA-6786012;R-HSA-2022405;R-HSA-4655355
R-HSA-1430728	Metabolism	22	3585	0.25849	0.988922	0.988922	49	2184	0.187581	9606	Homo sapiens	CHST9;ND6;ATP8;ATP6;PDHB;PAPSS1;SULT2B1;FOLH1;B3GNT7;TNFAIP8L1;COX3;CYP1B1;COX2;ND1;COX1;CYTB;ND3;ND5;ND4		R-HSA-5693783;R-HSA-1971483;R-HSA-6799202;R-HSA-176517;R-HSA-9018880;R-HSA-204169;R-HSA-163214;R-HSA-163217;R-HSA-2314678;R-HSA-9028255;R-HSA-6792572;R-HSA-2314686;R-HSA-9027607;R-HSA-9027627;R-HSA-2161795;R-HSA-203946;R-HSA-164651;R-HSA-6799179;R-HSA-2309773;R-HSA-2309779;R-HSA-6799191;R-HSA-2161940;R-HSA-2161814;R-HSA-174389;R-HSA-6799199;R-HSA-2309787;R-HSA-174392;R-HSA-6799197;R-HSA-6799196;R…
R-HSA-372790	Signaling by GPCR	6	1414	0.101954	0.99039	0.99039	13	386	0.033153	9606	Homo sapiens	REEP1;PREX1;PDE1A;WNT5A;PPP1R1B;FZD8		R-HSA-180038;R-HSA-177284;R-HSA-180073;R-HSA-180047;R-HSA-201708;R-HSA-111955;R-HSA-381750;R-HSA-111956;R-HSA-419166;R-HSA-201787;R-HSA-177275;R-HSA-201790;R-HSA-418553
R-HSA-5663205	Infectious disease	1	537	0.0387194	0.992818	0.992818	1	328	0.0281714	9606	Homo sapiens	MAP2K6		R-HSA-5211405
R-HSA-109582	Hemostasis	2	806	0.0581152	0.995104	0.995104	4	327	0.0280855	9606	Homo sapiens	PDE1A;KIF20A		R-HSA-983259;R-HSA-984648;R-HSA-983266;R-HSA-418456
R-HSA-422475	Axon guidance	1	582	0.0419641	0.995293	0.995293	1	297	0.0255089	9606	Homo sapiens	COL2A1		R-HSA-375151
R-HSA-168256	Immune System	13	2638	0.190208	0.996978	0.996978	17	1470	0.126256	9606	Homo sapiens	CDC20;COL2A1;ATP8A1;HVCN1;FBXO2;CCNF;FGL2;COX2;KIF20A;MAP2K6;LMNB1		R-HSA-727819;R-HSA-2213248;R-HSA-983147;R-HSA-6790029;R-HSA-1247960;R-HSA-983140;R-HSA-450346;R-HSA-6798743;R-HSA-8950681;R-HSA-6799350;R-HSA-5696356;R-HSA-6798739;R-HSA-6800434;R-HSA-983157;R-HSA-450333;R-HSA-983156;R-HSA-450296
R-HSA-168249	Innate Immune System	4	1302	0.0938784	0.997995	0.997995	9	651	0.0559134	9606	Homo sapiens	ATP8A1;HVCN1;FGL2;MAP2K6		R-HSA-727819;R-HSA-6798743;R-HSA-6799350;R-HSA-6798739;R-HSA-6800434;R-HSA-450333;R-HSA-1247960;R-HSA-450346;R-HSA-450296
R-HSA-1643685	Disease	5	1512	0.10902	0.998437	0.998437	9	944	0.0810788	9606	Homo sapiens	FZD8;CYP1B1;PAPSS1;MAP2K6;LMNB1		R-HSA-6802935;R-HSA-6802934;R-HSA-5211405;R-HSA-6802933;R-HSA-8868340;R-HSA-6802932;R-HSA-6802927;R-HSA-5340587;R-HSA-5605147
R-HSA-388396	GPCR downstream signalling	4	1347	0.0971231	0.99858	0.99858	12	216	0.0185519	9606	Homo sapiens	REEP1;PREX1;PDE1A;PPP1R1B		R-HSA-111955;R-HSA-381750;R-HSA-180038;R-HSA-111956;R-HSA-177284;R-HSA-419166;R-HSA-201787;R-HSA-177275;R-HSA-180073;R-HSA-201790;R-HSA-180047;R-HSA-418553
R-HSA-382551	Transport of small molecules	2	960	0.0692191	0.998686	0.998686	3	430	0.0369321	9606	Homo sapiens	SLC24A3;ATP8A1		R-HSA-425678;R-HSA-947591;R-HSA-939763
R-HSA-556833	Metabolism of lipids	4	1433	0.103324	0.999274	0.999274	21	942	0.080907	9606	Homo sapiens	TNFAIP8L1;CYP1B1;COX2;COX1		R-HSA-8874470;R-HSA-9026408;R-HSA-140355;R-HSA-2161890;R-HSA-9027627;R-HSA-2161795;R-HSA-9027532;R-HSA-140359;R-HSA-9018880;R-HSA-2161899;R-HSA-9020261;R-HSA-2309773;R-HSA-2309779;R-HSA-2161940;R-HSA-2314678;R-HSA-2161814;R-HSA-9028255;R-HSA-2309787;R-HSA-2314686;R-HSA-9027607;R-HSA-2161951

## Sheet: Overlap all lines up 2-fold
	gene	MUG_LFC	UCH_LFC	UM_LFC	UCH7_LFC	SYMBOL	GENENAME
27	ENSG00000006128	4.35552	2.32938	3.28012	3.4837	TAC1	tachykinin precursor 1
55	ENSG00000008517	1.99517	1.36299	2.57686	2.65373	IL32	interleukin 32
62	ENSG00000010379	3.97938	1.09736	3.42681	1.67262	SLC6A13	solute carrier family 6 member 13
63	ENSG00000010810	2.82222	1.91901	2.26604	2.42115	FYN	FYN proto-oncogene, Src family tyrosine kinase
73	ENSG00000012124	1.19227	1.52706	2.72801	1.24046	CD22	CD22 molecule
93	ENSG00000018625	2.12923	1.32625	3.27342	2.27082	ATP1A2	ATPase Na+/K+ transporting subunit alpha 2
121	ENSG00000026751	4.94651	2.83698	6.01334	2.75295	SLAMF7	SLAM family member 7
127	ENSG00000031698	1.35337	1.01198	1.03685	1.1988	SARS	seryl-tRNA synthetase
143	ENSG00000042832	3.84034	1.02854	3.55494	1.30225	TG	thyroglobulin
149	ENSG00000047617	1.2519	2.90927	2.0595	2.39923	ANO2	anoctamin 2
156	ENSG00000049130	2.37997	2.28239	3.35314	2.67039	KITLG	KIT ligand
194	ENSG00000058085	1.39521	1.02712	2.92899	1.22672	LAMC2	laminin subunit gamma 2
198	ENSG00000059728	2.98425	2.09356	2.01723	1.59266	MXD1	MAX dimerization protein 1
199	ENSG00000059804	3.13151	2.19706	2.00013	1.12503	SLC2A3	solute carrier family 2 member 3
222	ENSG00000065618	5.34619	3.53321	5.3459	2.20912	COL17A1	collagen type XVII alpha 1 chain
225	ENSG00000065911	1.01414	1.25457	1.00039	1.61766	MTHFD2	methylenetetrahydrofolate dehydrogenase (NADP+ dependent) 2, methenyltetrahydrofolate cyclohydrolase
242	ENSG00000069431	1.72324	1.8801	7.2295	2.84728	ABCC9	ATP binding cassette subfamily C member 9
254	ENSG00000070669	1.06797	2.24587	1.595	2.29681	ASNS	asparagine synthetase (glutamine-hydrolyzing)
266	ENSG00000072041	2.04861	1.53443	5.55816	1.0397	SLC6A15	solute carrier family 6 member 15
288	ENSG00000074660	2.27528	1.88488	2.55027	1.52405	SCARF1	scavenger receptor class F member 1
292	ENSG00000074966	3.86147	1.23838	1.95701	1.54063	TXK	TXK tyrosine kinase
296	ENSG00000075275	2.35901	1.071	1.21115	2.0464	CELSR1	cadherin EGF LAG seven-pass G-type receptor 1
299	ENSG00000075391	1.97764	1.26214	2.06598	1.8085	RASAL2	RAS protein activator like 2
336	ENSG00000079385	2.06405	1.82863	4.75164	1.20223	CEACAM1	carcinoembryonic antigen related cell adhesion molecule 1
349	ENSG00000081181	2.80068	3.73028	3.81349	3.59171	ARG2	arginase 2
387	ENSG00000087074	3.09055	1.48688	2.62682	1.89656	PPP1R15A	protein phosphatase 1 regulatory subunit 15A
405	ENSG00000088726	4.41528	1.01293	3.88231	1.51858	TMEM40	transmembrane protein 40
408	ENSG00000088826	2.36459	1.52448	1.69872	1.53952	SMOX	spermine oxidase
451	ENSG00000092621	1.93006	1.73102	2.39817	2.86692	PHGDH	phosphoglycerate dehydrogenase
452	ENSG00000092929	1.09696	1.34359	1.03654	2.50825	UNC13D	unc-13 homolog D
459	ENSG00000095397	2.13679	1.79238	1.99352	1.52725	WHRN	whirlin
478	ENSG00000099338	3.57886	2.31764	1.6794	1.79675	CATSPERG	cation channel sperm associated auxiliary subunit gamma
485	ENSG00000099875	1.44041	1.75682	2.15961	2.66586	MKNK2	MAP kinase interacting serine/threonine kinase 2
506	ENSG00000100292	1.84324	2.67321	3.42651	2.01382	HMOX1	heme oxygenase 1
507	ENSG00000100302	2.74206	1.68437	1.41416	2.88347	RASD2	RASD family member 2
521	ENSG00000100592	2.62431	1.24524	2.30491	1.15713	DAAM1	dishevelled associated activator of morphogenesis 1
538	ENSG00000101076	4.3107	2.52062	3.86476	4.25877	HNF4A	hepatocyte nuclear factor 4 alpha
549	ENSG00000101203	3.59558	1.08209	2.60909	1.67712	COL20A1	collagen type XX alpha 1 chain
555	ENSG00000101255	2.7501	1.93071	2.11846	5.34476	TRIB3	tribbles pseudokinase 3
617	ENSG00000103249	1.26632	1.21839	1.06321	1.37023	CLCN7	chloride voltage-gated channel 7
618	ENSG00000103257	1.21181	1.81919	1.35592	1.11877	SLC7A5	solute carrier family 7 member 5
620	ENSG00000103316	4.17311	1.39821	5.97398	2.15563	CRYM	crystallin mu
681	ENSG00000105327	1.34118	2.71095	3.30741	1.9936	BBC3	BCL2 binding component 3
714	ENSG00000105851	4.46888	1.1314	4.66899	2.48386	PIK3CG	phosphatidylinositol-4,5-bisphosphate 3-kinase catalytic subunit gamma
729	ENSG00000106105	1.16926	1.42448	1.34764	1.64039	GARS	glycyl-tRNA synthetase
773	ENSG00000107731	3.12316	1.65483	1.58692	2.13895	UNC5B	unc-5 netrin receptor B
775	ENSG00000107742	2.50342	3.13661	2.91473	2.22901	SPOCK2	SPARC (osteonectin), cwcv and kazal like domains proteoglycan 2
853	ENSG00000110203	6.21343	4.66335	6.2465	2.62185	FOLR3	folate receptor 3
857	ENSG00000110400	1.02535	1.59526	1.4022	1.45062	NECTIN1	nectin cell adhesion molecule 1
865	ENSG00000110721	1.255	1.2097	1.17536	1.34665	CHKA	choline kinase alpha
938	ENSG00000112715	2.22956	1.46308	1.65482	1.05793	VEGFA	vascular endothelial growth factor A
981	ENSG00000114796	1.81435	1.64633	1.28528	1.21925	KLHL24	kelch like family member 24
990	ENSG00000115194	5.7995	2.1734	3.47445	4.28862	SLC30A3	solute carrier family 30 member 3
1005	ENSG00000115641	2.42283	2.08377	2.49794	3.20516	FHL2	four and a half LIM domains 2
1018	ENSG00000115963	4.17666	1.45999	2.85032	2.09066	RND3	Rho family GTPase 3
1025	ENSG00000116285	2.35979	1.31915	2.89554	1.52206	ERRFI1	ERBB receptor feedback inhibitor 1
1032	ENSG00000116717	3.38784	1.77825	3.73215	1.747	GADD45A	growth arrest and DNA damage inducible alpha
1058	ENSG00000117245	1.00617	1.5377	2.94436	1.41869	KIF17	kinesin family member 17
1066	ENSG00000117479	2.21213	1.06431	1.10789	1.00122	SLC19A2	solute carrier family 19 member 2
1079	ENSG00000118160	3.08107	2.2907	2.58096	3.09161	SLC8A2	solute carrier family 8 member A2
1089	ENSG00000118503	2.61574	1.30122	3.39445	1.43657	TNFAIP3	TNF alpha induced protein 3
1110	ENSG00000119630	1.19256	3.55257	2.49459	2.40043	PGF	placental growth factor
1126	ENSG00000120051	1.7536	2.3058	4.05723	1.7778	CFAP58	cilia and flagella associated protein 58
1136	ENSG00000120279	5.83141	5.16044	7.62724	1.72585	MYCT1	MYC target 1
1154	ENSG00000120889	1.20834	1.13454	1.36035	1.24478	TNFRSF10B	TNF receptor superfamily member 10b
1170	ENSG00000121552	5.25276	3.98451	3.75376	6.79917	CSTA	cystatin A
1188	ENSG00000122254	2.49867	1.14219	1.57686	1.72089	HS3ST2	heparan sulfate-glucosamine 3-sulfotransferase 2
1204	ENSG00000122877	1.88982	2.76964	5.25871	1.00951	EGR2	early growth response 2
1219	ENSG00000123612	3.51961	1.75338	3.35053	2.49778	ACVR1C	activin A receptor type 1C
1221	ENSG00000123700	2.26926	1.67282	2.42352	2.61647	KCNJ2	potassium voltage-gated channel subfamily J member 2
1259	ENSG00000124762	2.47373	2.43401	2.34499	1.996	CDKN1A	cyclin dependent kinase inhibitor 1A
1268	ENSG00000125144	2.29225	3.86448	2.90838	5.13965	MT1G	metallothionein 1G
1269	ENSG00000125148	1.10132	2.45608	2.64461	3.09578	MT2A	metallothionein 2A
1279	ENSG00000125657	1.26634	1.38479	1.47977	1.67054	TNFSF9	TNF superfamily member 9
1285	ENSG00000125787	4.18076	2.01863	2.18627	1.21708	GNRH2	gonadotropin releasing hormone 2
1297	ENSG00000125998	4.03269	1.23984	4.7881	2.39179	FAM83C	family with sequence similarity 83 member C
1300	ENSG00000126218	1.18915	1.40178	1.80794	1.60724	F10	coagulation factor X
1311	ENSG00000126860	3.15675	2.6378	2.98006	1.83782	EVI2A	ecotropic viral integration site 2A
1323	ENSG00000127578	1.07791	1.49154	1.10475	1.09261	WFIKKN1	WAP, follistatin/kazal, immunoglobulin, kunitz and netrin domain containing 1
1340	ENSG00000128346	1.04972	1.87579	1.43208	1.631	C22orf23	chromosome 22 open reading frame 23
1345	ENSG00000128564	2.15146	1.32134	3.19954	1.40543	VGF	VGF nerve growth factor inducible
1360	ENSG00000128965	1.43934	2.5832	1.47225	2.64353	CHAC1	ChaC glutathione specific gamma-glutamylcyclotransferase 1
1372	ENSG00000129450	3.23075	3.0555	5.00582	2.5122	SIGLEC9	sialic acid binding Ig like lectin 9
1405	ENSG00000130487	3.63877	1.40733	1.0767	4.69035	KLHDC7B	kelch domain containing 7B
1406	ENSG00000130513	3.53927	4.27053	4.94964	4.27912	GDF15	growth differentiation factor 15
1408	ENSG00000130518	3.18698	1.58563	3.73982	1.09145	IQCN	IQ motif containing N
1421	ENSG00000130766	2.71116	2.1279	2.11442	2.36406	SESN2	sestrin 2
1454	ENSG00000131480	4.47985	1.85521	2.5703	1.97571	AOC2	amine oxidase, copper containing 2
1460	ENSG00000131737	5.67735	3.40816	6.08302	4.17761	KRT34	keratin 34
1474	ENSG00000132185	4.89928	1.48544	3.80181	2.12136	FCRLA	Fc receptor like A
1511	ENSG00000133134	2.18642	1.62782	1.18844	3.85407	BEX2	brain expressed X-linked 2
1519	ENSG00000133639	1.63741	1.93055	2.65594	1.03033	BTG1	BTG anti-proliferation factor 1
1550	ENSG00000134242	1.15287	2.22591	4.29935	1.30724	PTPN22	protein tyrosine phosphatase, non-receptor type 22
1583	ENSG00000135069	1.10462	1.69351	1.05266	2.07635	PSAT1	phosphoserine aminotransferase 1
1589	ENSG00000135116	5.3909	2.91506	5.30429	4.13191	HRK	harakiri, BCL2 interacting protein
1618	ENSG00000135842	2.13732	1.65708	1.1883	3.84505	FAM129A	family with sequence similarity 129 member A
1625	ENSG00000135951	1.57815	1.99663	1.14681	1.05549	TSGA10	testis specific 10
1634	ENSG00000136114	2.84787	2.70094	1.77557	2.90855	THSD1	thrombospondin type 1 domain containing 1
1656	ENSG00000136696	1.11271	2.65513	4.3612	3.5058	IL36B	interleukin 36 beta
1708	ENSG00000137875	2.16853	2.43126	4.06219	5.17721	BCL2L10	BCL2 like 10
1717	ENSG00000138100	3.12382	3.39719	3.96251	2.40326	TRIM54	tripartite motif containing 54
1718	ENSG00000138109	5.33466	2.92576	3.28596	5.48209	CYP2C9	cytochrome P450 family 2 subfamily C member 9
1778	ENSG00000139890	1.23557	1.90847	2.22818	2.45919	REM2	RRAD and GEM like GTPase 2
1784	ENSG00000140022	1.40067	1.48621	7.28778	1.35761	STON2	stonin 2
1787	ENSG00000140105	1.00503	1.21741	1.1417	2.49518	WARS	tryptophanyl-tRNA synthetase
1793	ENSG00000140297	1.4263	1.78504	4.52432	3.1576	GCNT3	glucosaminyl (N-acetyl) transferase 3, mucin type
1802	ENSG00000140488	1.61846	1.19628	1.96044	2.40043	CELF6	CUGBP Elav-like family member 6
1809	ENSG00000140600	3.24962	1.40557	1.22923	4.53971	SH3GL3	SH3 domain containing GRB2 like 3, endophilin A3
1833	ENSG00000141458	1.49348	1.5231	2.11148	1.17669	NPC1	NPC intracellular cholesterol transporter 1
1839	ENSG00000141682	2.93502	2.45263	3.11252	1.64225	PMAIP1	phorbol-12-myristate-13-acetate-induced protein 1
1878	ENSG00000143217	3.00893	3.94611	5.62256	3.34714	NECTIN4	nectin cell adhesion molecule 4
1881	ENSG00000143322	2.38027	1.10844	1.95023	1.52812	ABL2	ABL proto-oncogene 2, non-receptor tyrosine kinase
1895	ENSG00000143507	2.89629	1.17389	4.00851	2.89309	DUSP10	dual specificity phosphatase 10
1901	ENSG00000143631	2.66842	5.58913	4.4964	1.25772	FLG	filaggrin
1923	ENSG00000144366	2.97271	1.22304	5.11796	1.13761	GULP1	GULP, engulfment adaptor PTB domain containing 1
1937	ENSG00000144802	1.58775	1.24787	1.04998	1.33689	NFKBIZ	NFKB inhibitor zeta
1996	ENSG00000146221	5.74294	3.28809	4.18165	1.16817	TCTE1	t-complex-associated-testis-expressed 1
2006	ENSG00000146592	3.64166	1.86411	3.45058	1.14924	CREB5	cAMP responsive element binding protein 5
2068	ENSG00000148677	3.90325	3.38746	2.55231	3.1933	ANKRD1	ankyrin repeat domain 1
2091	ENSG00000149506	2.80492	4.72376	2.25068	2.76436	ZP1	zona pellucida glycoprotein 1
2100	ENSG00000149968	1.86378	1.92785	2.04843	1.24729	MMP3	matrix metallopeptidase 3
2114	ENSG00000150782	1.10355	1.18664	1.93348	1.25295	IL18	interleukin 18
2116	ENSG00000150995	2.26552	2.1559	1.12032	1.28181	ITPR1	inositol 1,4,5-trisphosphate receptor type 1
2146	ENSG00000151967	2.57494	3.22958	2.93093	1.97377	SCHIP1	schwannomin interacting protein 1
2192	ENSG00000153237	2.12728	3.15057	4.17458	1.75264	CCDC148	coiled-coil domain containing 148
2194	ENSG00000153294	2.70665	1.22277	4.36693	2.75752	ADGRF4	adhesion G protein-coupled receptor F4
2202	ENSG00000153714	3.31452	1.54924	3.24748	3.39021	LURAP1L	leucine rich adaptor protein 1 like
2263	ENSG00000155749	1.53624	1.43022	1.00146	1.7264	ALS2CR12	amyotrophic lateral sclerosis 2 chromosome region 12
2296	ENSG00000156453	3.86755	1.66916	1.07755	3.33132	PCDH1	protocadherin 1
2302	ENSG00000156510	1.55796	2.58892	2.84394	4.64866	HKDC1	hexokinase domain containing 1
2308	ENSG00000156804	2.71465	2.36236	2.22182	2.9769	FBXO32	F-box protein 32
2318	ENSG00000157315	1.64856	1.29112	1.3168	1.16508	TMED6	transmembrane p24 trafficking protein 6
2363	ENSG00000158517	2.08041	1.32345	1.21739	1.09836	NCF1	neutrophil cytosolic factor 1
2395	ENSG00000159261	2.82882	3.3643	5.20078	2.03342	CLDN14	claudin 14
2446	ENSG00000160862	3.71158	3.49388	2.49071	4.75729	AZGP1	alpha-2-glycoprotein 1, zinc-binding
2470	ENSG00000161509	1.55341	2.42426	3.948	2.305	GRIN2C	glutamate ionotropic receptor NMDA type subunit 2C
2501	ENSG00000162461	3.32913	1.67963	2.32092	2.84022	SLC25A34	solute carrier family 25 member 34
2516	ENSG00000162643	2.24436	2.14032	3.20259	3.57617	WDR63	WD repeat domain 63
2531	ENSG00000162772	4.12317	2.88394	4.54483	2.70788	ATF3	activating transcription factor 3
2552	ENSG00000163141	3.09301	1.52967	1.11019	1.13615	BNIPL	BCL2 interacting protein like
2557	ENSG00000163207	2.61037	2.08041	6.29136	1.62212	IVL	involucrin
2629	ENSG00000164122	1.69387	3.02747	4.41132	1.14197	ASB5	ankyrin repeat and SOCS box containing 5
2642	ENSG00000164266	6.60122	5.05546	7.88369	3.5144	SPINK1	serine peptidase inhibitor, Kazal type 1
2654	ENSG00000164400	4.38526	2.22689	4.73804	4.81855	CSF2	colony stimulating factor 2
2683	ENSG00000164746	4.26411	3.31017	3.41563	2.25678	C7orf57	chromosome 7 open reading frame 57
2691	ENSG00000164867	3.50877	3.7338	2.79752	1.55665	NOS3	nitric oxide synthase 3
2703	ENSG00000165030	2.50541	1.09134	2.13314	1.68202	NFIL3	nuclear factor, interleukin 3 regulated
2749	ENSG00000165917	3.64862	3.09467	2.02902	1.32961	RAPSN	receptor associated protein of the synapse
2779	ENSG00000166396	3.9145	2.1617	4.60972	1.34089	SERPINB7	serpin family B member 7
2780	ENSG00000166401	1.1822	1.62321	1.86743	1.21922	SERPINB8	serpin family B member 8
2793	ENSG00000166592	1.1878	2.47962	4.30997	2.8623	RRAD	RRAD, Ras related glycolysis inhibitor and calcium channel regulator
2803	ENSG00000166866	4.36216	2.88742	3.64532	1.15502	MYO1A	myosin IA
2823	ENSG00000167207	3.41465	1.31398	5.03428	1.43267	NOD2	nucleotide binding oligomerization domain containing 2
2848	ENSG00000167653	1.36946	1.53949	1.36628	1.38724	PSCA	prostate stem cell antigen
2856	ENSG00000167749	5.9289	2.5937	4.71434	2.59364	KLK4	kallikrein related peptidase 4
2877	ENSG00000167995	1.10936	2.03153	1.45522	2.72829	BEST1	bestrophin 1
2879	ENSG00000168003	3.23628	1.40964	2.6612	1.80934	SLC3A2	solute carrier family 3 member 2
2881	ENSG00000168016	1.29485	1.01958	1.76068	1.36083	TRANK1	tetratricopeptide repeat and ankyrin repeat containing 1
2913	ENSG00000168621	5.12412	2.14089	1.38008	1.38229	GDNF	glial cell derived neurotrophic factor
2935	ENSG00000169067	5.33677	4.07423	5.0522	2.75714	ACTBL2	actin, beta like 2
2938	ENSG00000169087	1.27016	1.14728	1.92906	1.04343	HSPBAP1	HSPB1 associated protein 1
2976	ENSG00000169862	1.67215	2.73469	1.10747	1.00277	CTNND2	catenin delta 2
3012	ENSG00000170385	1.44449	1.88717	2.74809	1.23859	SLC30A1	solute carrier family 30 member 1
3029	ENSG00000170689	3.21857	1.44748	1.4024	2.61617	HOXB9	homeobox B9
3030	ENSG00000170703	1.02505	1.76781	2.18131	3.95035	TTLL6	tubulin tyrosine ligase like 6
3041	ENSG00000170848	7.11668	2.88323	5.43683	4.097	PSG6	pregnancy specific beta-1-glycoprotein 6
3144	ENSG00000172575	2.32597	2.00589	1.94047	3.7187	RASGRP1	RAS guanyl releasing protein 1
3147	ENSG00000172602	4.02551	2.33316	3.10112	1.22963	RND1	Rho family GTPase 1
3151	ENSG00000172738	2.42493	1.2127	2.22948	1.86145	TMEM217	transmembrane protein 217
3166	ENSG00000173157	3.0571	2.44274	3.22224	1.72484	ADAMTS20	ADAM metallopeptidase with thrombospondin type 1 motif 20
3170	ENSG00000173212	2.74501	2.00552	4.73428	4.73046	MAB21L3	mab-21 like 3
3203	ENSG00000173926	2.77012	1.01841	1.3345	1.18884	2003-03-01	membrane associated ring-CH-type finger 3
3212	ENSG00000174123	2.2042	2.42916	2.16739	2.11784	TLR10	toll like receptor 10
3259	ENSG00000175197	2.74353	2.0412	2.43746	2.82882	DDIT3	DNA damage inducible transcript 3
3292	ENSG00000176046	1.749	1.99236	1.57375	2.19103	NUPR1	nuclear protein 1, transcriptional regulator
3361	ENSG00000177575	3.93368	1.89577	3.31757	1.83809	CD163	CD163 molecule
3395	ENSG00000178607	2.02217	1.52061	1.34289	1.90448	ERN1	endoplasmic reticulum to nucleus signaling 1
3396	ENSG00000178623	2.91962	2.14244	1.86869	1.25611	GPR35	G protein-coupled receptor 35
3398	ENSG00000178752	2.10117	1.42455	3.82854	3.94862	ERFE	erythroferrone
3399	ENSG00000178773	2.21968	1.51715	1.05839	1.46466	CPNE7	copine 7
3416	ENSG00000179148	4.84412	3.38784	6.5703	1.90925	ALOXE3	arachidonate lipoxygenase 3
3424	ENSG00000179300	1.45491	1.85004	2.98869	4.42784	RTL3	retrotransposon Gag like 3
3473	ENSG00000180720	4.77484	1.23145	1.95297	3.2135	CHRM4	cholinergic receptor muscarinic 4
3524	ENSG00000182261	3.46848	4.31217	7.94828	2.06213	NLRP10	NLR family pyrin domain containing 10
3526	ENSG00000182308	2.69987	1.53975	1.48956	2.01672	DCAF4L1	DDB1 and CUL4 associated factor 4 like 1
3536	ENSG00000182578	1.61814	1.39169	3.92755	1.64873	CSF1R	colony stimulating factor 1 receptor
3545	ENSG00000182759	2.24877	2.05872	1.13871	1.14783	MAFA	MAF bZIP transcription factor A
3617	ENSG00000183671	1.67898	1.34251	2.6745	1.94172	GPR1	G protein-coupled receptor 1
3627	ENSG00000183778	1.90344	1.30547	2.67656	1.54758	B3GALT5	beta-1,3-galactosyltransferase 5
3650	ENSG00000184350	3.08188	7.21975	6.26202	6.28633	MRGPRE	MAS related GPR family member E
3680	ENSG00000184999	4.77593	3.5993	5.31257	3.04213	SLC22A10	solute carrier family 22 member 10
3682	ENSG00000185022	2.86511	2.7206	3.36911	1.58207	MAFF	MAF bZIP transcription factor F
3705	ENSG00000185527	1.33743	3.26991	3.57973	2.67279	PDE6G	phosphodiesterase 6G
3710	ENSG00000185650	1.12287	1.18624	1.72002	1.74823	ZFP36L1	ZFP36 ring finger protein like 1
3769	ENSG00000186567	2.44186	2.33142	2.17124	1.60536	CEACAM19	carcinoembryonic antigen related cell adhesion molecule 19
3777	ENSG00000186832	2.90084	1.11841	3.02054	2.18336	KRT16	keratin 16
3797	ENSG00000187193	2.4843	3.63123	4.48356	3.55336	MT1X	metallothionein 1X
3804	ENSG00000187486	1.85271	2.71936	1.4558	3.05454	KCNJ11	potassium voltage-gated channel subfamily J member 11
3818	ENSG00000187800	2.439	1.36931	1.97226	1.94067	PEAR1	platelet endothelial aggregation receptor 1
3830	ENSG00000187944	2.27146	1.93522	2.78708	1.79983	C2orf66	chromosome 2 open reading frame 66
3857	ENSG00000188290	1.75844	2.63203	1.57824	1.64833	HES4	hes family bHLH transcription factor 4
3877	ENSG00000188687	1.1682	1.40657	1.91719	1.93946	SLC4A5	solute carrier family 4 member 5
3940	ENSG00000189275	2.16401	4.84474	7.60392	4.20334	LINC01164	long intergenic non-protein coding RNA 1164
3948	ENSG00000189410	2.9488	1.54653	2.61098	3.60633	SH2D5	SH2 domain containing 5
3950	ENSG00000189433	4.01168	2.06549	1.62992	1.11522	GJB4	gap junction protein beta 4
3955	ENSG00000196091	2.99523	2.87132	7.51703	1.91629	MYBPC1	myosin binding protein C, slow type
3978	ENSG00000196352	1.77864	1.63332	2.41149	1.07469	CD55	CD55 molecule (Cromer blood group)
3998	ENSG00000196557	1.06068	3.32439	3.26162	1.09468	CACNA1H	calcium voltage-gated channel subunit alpha1 H
4040	ENSG00000197106	3.7793	2.30484	2.89252	2.87306	SLC6A17	solute carrier family 6 member 17
4047	ENSG00000197181	5.55985	2.30006	2.134	1.00606	PIWIL2	piwi like RNA-mediated gene silencing 2
4070	ENSG00000197599	2.24304	1.76336	1.43715	2.93285	CCDC154	coiled-coil domain containing 154
4096	ENSG00000197915	1.46577	3.80064	4.06097	2.55564	HRNR	hornerin
4110	ENSG00000198092	5.51158	4.51682	5.56897	5.44425	TMPRSS11F	transmembrane serine protease 11F
4157	ENSG00000198691	1.50302	1.38364	1.64513	2.40802	ABCA4	ATP binding cassette subfamily A member 4
4192	ENSG00000203786	4.99558	5.21954	6.48809	2.77858	KPRP	keratinocyte proline rich protein
4195	ENSG00000203837	5.16194	4.45939	6.02272	2.3442	PNLIPRP3	pancreatic lipase related protein 3
4291	ENSG00000211448	2.5667	2.22647	3.23932	1.03772	DIO2	iodothyronine deiodinase 2
4373	ENSG00000215126	1.63059	1.4904	1.75202	1.41908	CBWD2	COBW domain containing 2
4374	ENSG00000215126	1.63059	1.4904	1.75202	1.41908	CBWD6	COBW domain containing 6
4375	ENSG00000215126	1.63059	1.4904	1.75202	1.41908	CBWD2	COBW domain containing 2
4376	ENSG00000215126	1.63059	1.4904	1.75202	1.41908	CBWD6	COBW domain containing 6
4377	ENSG00000215126	1.63059	1.4904	1.75202	1.41908	CBWD2	COBW domain containing 2
4378	ENSG00000215126	1.63059	1.4904	1.75202	1.41908	CBWD6	COBW domain containing 6
4379	ENSG00000215126	1.63059	1.4904	1.75202	1.41908	CBWD2	COBW domain containing 2
4380	ENSG00000215126	1.63059	1.4904	1.75202	1.41908	CBWD6	COBW domain containing 6
4392	ENSG00000215853	1.86849	3.95917	4.0558	1.57868	RPTN	repetin
4428	ENSG00000223638	5.90596	2.57942	5.71581	2.34921	RFPL4A	ret finger protein like 4A
4438	ENSG00000225190	1.65144	1.67968	2.52889	1.03315	PLEKHM1	pleckstrin homology and RUN domain containing M1
4513	ENSG00000240891	1.7279	2.14713	2.20561	1.42651	PLCXD2	phosphatidylinositol specific phospholipase C X domain containing 2
4532	ENSG00000243130	5.62839	1.88547	4.73351	1.99	PSG11	pregnancy specific beta-1-glycoprotein 11
4533	ENSG00000243137	3.13726	1.08141	5.15533	3.41841	PSG4	pregnancy specific beta-1-glycoprotein 4
4610	ENSG00000257743	3.96165	3.37389	4.04341	2.47775	MGAM2	maltase-glucoamylase 2 (putative)
4689	ENSG00000272514	2.27499	1.11277	1.52081	2.26795	CFAP206	cilia and flagella associated protein 206

## Sheet: Reactome overlap genes up
Pathway identifier	Pathway name	#Entities found	#Entities total	Entities ratio	Entities pValue	Entities FDR	#Reactions found	#Reactions total	Reactions ratio	Species identifier	Species name	Submitted entities found	Mapped entities	Found reaction identifiers
R-HSA-380994	ATF4 activates genes	6	32	0.0023073	4.56547e-05	0.0306343	3	7	0.00060122	9606	Homo sapiens	DDIT3;ASNS;ATF3		R-HSA-1791118;R-HSA-1791107;R-HSA-1791173
R-HSA-381042	PERK regulates gene expression	6	38	0.00273992	0.000116202	0.0389278	3	11	0.000944774	9606	Homo sapiens	DDIT3;ASNS;ATF3		R-HSA-1791118;R-HSA-1791107;R-HSA-1791173
R-HSA-69560	Transcriptional activation of p53 responsive genes	3	6	0.00043262	0.000240933	0.0402359	4	5	0.000429443	9606	Homo sapiens	CDKN1A		R-HSA-6803411;R-HSA-6803388;R-HSA-6803403;R-HSA-6803801
R-HSA-69895	Transcriptional activation of cell cycle inhibitor p21	3	6	0.00043262	0.000240933	0.0402359	4	5	0.000429443	9606	Homo sapiens	CDKN1A		R-HSA-6803411;R-HSA-6803388;R-HSA-6803403;R-HSA-6803801
R-HSA-210745	Regulation of gene expression in beta cells	5	35	0.00252361	0.000678096	0.0908649	3	12	0.00103066	9606	Homo sapiens	HNF4A;MAFA		R-HSA-211466;R-HSA-211289;R-HSA-211272
R-HSA-5633008	TP53 Regulates Transcription of Cell Death Genes	7	83	0.00598457	0.00134816	0.131292	6	68	0.00584042	9606	Homo sapiens	PMAIP1;TNFRSF10B;BBC3		R-HSA-4331331;R-HSA-5633414;R-HSA-5633441;R-HSA-140214;R-HSA-139913;R-HSA-4331340
R-HSA-9012546	Interleukin-18 signaling	3	11	0.000793136	0.00138202	0.131292	4	4	0.000343554	9606	Homo sapiens	IL18		R-HSA-8848370;R-HSA-6797293;R-HSA-8848395;R-HSA-8848392
R-HSA-202733	Cell surface interactions at the vascular wall	13	256	0.0184584	0.00175262	0.145468	8	64	0.00549687	9606	Homo sapiens	SLC7A5;CEACAM1;PSG4;PSG6;TNFRSF10B;FYN;PSG11;SLC3A2		R-HSA-210291;R-HSA-114577;R-HSA-202723;R-HSA-8867135;R-HSA-5635741;R-HSA-8870732;R-HSA-202717;R-HSA-375131
R-HSA-5661231	Metallothioneins bind metals	3	16	0.00115365	0.00396036	0.229043	7	27	0.00231899	9606	Homo sapiens	MT2A;MT1G;MT1X		R-HSA-5662598;R-HSA-5662615;R-HSA-5662608;R-HSA-5662622;R-HSA-5662618;R-HSA-5662986;R-HSA-5662617
R-HSA-6803204	TP53 Regulates Transcription of Genes Involved in Cytochrome C Release	4	33	0.00237941	0.00420457	0.229043	4	25	0.00214721	9606	Homo sapiens	PMAIP1;BBC3		R-HSA-4331331;R-HSA-140214;R-HSA-139913;R-HSA-4331340
R-HSA-380095	Tachykinin receptors bind tachykinins	2	5	0.000360516	0.00442661	0.229043	3	3	0.000257666	9606	Homo sapiens	MYO1A;TAC1		R-HSA-383363;R-HSA-383373;R-HSA-380076
R-HSA-194138	Signaling by VEGF	8	134	0.00966184	0.00518477	0.229043	58	83	0.00712875	9606	Homo sapiens	NCF1;NOS3;ITPR1;FYN;TRIB3;PGF;VEGFA		R-HSA-194310;R-HSA-194311;R-HSA-202127;R-HSA-202129;R-HSA-5218645;R-HSA-202137;R-HSA-5218643;R-HSA-5218642;R-HSA-5218640;R-HSA-202144;R-HSA-5357429;R-HSA-5357432;R-HSA-4420202;R-HSA-4420206;R-HSA-1497784;R-HSA-195378;R-HSA-4420083;R-HSA-5218815;R-HSA-5218814;R-HSA-5218812;R-HSA-5218811;R-HSA-5218809;R-HSA-5218806;R-HSA-5218804;R-HSA-4420099;R-HSA-5218830;R-HSA-5218828;R-HSA-5218827;R-HSA-5218826;…
R-HSA-6803211	TP53 Regulates Transcription of Death Receptors and Ligands	3	18	0.00129786	0.00548088	0.229043	2	7	0.00060122	9606	Homo sapiens	TNFRSF10B		R-HSA-5633414;R-HSA-5633441
R-HSA-114452	Activation of BH3-only proteins	4	36	0.00259572	0.00569262	0.229043	10	19	0.00163188	9606	Homo sapiens	PMAIP1;BBC3		R-HSA-4331331;R-HSA-140214;R-HSA-139914;R-HSA-140216;R-HSA-139913;R-HSA-140217;R-HSA-4331327;R-HSA-4331324;R-HSA-4331340;R-HSA-140221
R-HSA-6809371	Formation of the cornified envelope	8	138	0.00995025	0.00614504	0.229043	12	27	0.00231899	9606	Homo sapiens	FLG;CSTA;KRT16;KRT34;IVL;RPTN		R-HSA-6810357;R-HSA-8849797;R-HSA-6814387;R-HSA-6811539;R-HSA-6810899;R-HSA-8942224;R-HSA-6814734;R-HSA-6810894;R-HSA-6814764;R-HSA-8934819;R-HSA-6814298;R-HSA-6810937
R-HSA-111448	Activation of NOXA and translocation to mitochondria	2	6	0.00043262	0.00629343	0.229043	5	5	0.000429443	9606	Homo sapiens	PMAIP1		R-HSA-4331331;R-HSA-140214;R-HSA-140216;R-HSA-140217;R-HSA-4331327
R-HSA-1296025	ATP sensitive Potassium channels	2	6	0.00043262	0.00629343	0.229043	2	2	0.000171777	9606	Homo sapiens	KCNJ11;ABCC9		R-HSA-1296024;R-HSA-1369017
R-HSA-8866911	TFAP2 (AP-2) family regulates transcription of cell cycle factors	2	6	0.00043262	0.00629343	0.229043	3	4	0.000343554	9606	Homo sapiens	CDKN1A		R-HSA-8865280;R-HSA-8865244;R-HSA-8865256
R-HSA-6804116	TP53 Regulates Transcription of Genes Involved in G1 Cell Cycle Arrest	3	20	0.00144207	0.0073081	0.229043	6	17	0.0014601	9606	Homo sapiens	CDKN1A		R-HSA-6803411;R-HSA-69562;R-HSA-6803388;R-HSA-187934;R-HSA-6803403;R-HSA-6803801
R-HSA-5660526	Response to metal ions	3	21	0.00151417	0.00834108	0.229043	7	31	0.00266254	9606	Homo sapiens	MT2A;MT1G;MT1X		R-HSA-5662598;R-HSA-5662615;R-HSA-5662608;R-HSA-5662622;R-HSA-5662618;R-HSA-5662986;R-HSA-5662617
R-HSA-420597	Nectin/Necl trans heterodimerization	2	7	0.000504723	0.00845752	0.229043	3	8	0.000687108	9606	Homo sapiens	NECTIN4;NECTIN1		R-HSA-420582;R-HSA-420598;R-HSA-420580
R-HSA-1566977	Fibronectin matrix formation	2	7	0.000504723	0.00845752	0.229043	1	3	0.000257666	9606	Homo sapiens	CEACAM1		R-HSA-202723
R-HSA-5578775	Ion homeostasis	5	64	0.00461461	0.00882339	0.229043	6	15	0.00128833	9606	Homo sapiens	KCNJ11;ITPR1;ABCC9;ATP1A2;SLC8A2		R-HSA-169683;R-HSA-5678261;R-HSA-5226904;R-HSA-425661;R-HSA-139854;R-HSA-936897
R-HSA-6785807	Interleukin-4 and Interleukin-13 signaling	10	211	0.0152138	0.00909935	0.229043	4	46	0.00395087	9606	Homo sapiens	CDKN1A;MMP3;IL18;HMOX1;VEGFA		R-HSA-6797268;R-HSA-6789615;R-HSA-6797293;R-HSA-6790041
R-HSA-6791312	TP53 Regulates Transcription of Cell Cycle Genes	5	65	0.00468671	0.0093883	0.229043	10	42	0.00360732	9606	Homo sapiens	CDKN1A;GADD45A		R-HSA-3215152;R-HSA-6791109;R-HSA-6791235;R-HSA-6803411;R-HSA-3215144;R-HSA-69562;R-HSA-6803388;R-HSA-187934;R-HSA-6803403;R-HSA-6803801
R-HSA-186712	Regulation of beta-cell development	5	67	0.00483092	0.0105919	0.229043	3	26	0.0022331	9606	Homo sapiens	HNF4A;MAFA		R-HSA-211466;R-HSA-211289;R-HSA-211272
R-HSA-75158	TRAIL signaling	2	8	0.000576826	0.0109068	0.229043	6	6	0.000515331	9606	Homo sapiens	TNFRSF10B		R-HSA-141139;R-HSA-75187;R-HSA-141316;R-HSA-75238;R-HSA-5635741;R-HSA-75146
R-HSA-194313	VEGF ligand-receptor interactions	2	8	0.000576826	0.0109068	0.229043	3	4	0.000343554	9606	Homo sapiens	PGF;VEGFA		R-HSA-195378;R-HSA-194310;R-HSA-194311
R-HSA-195399	VEGF binds to VEGFR leading to receptor dimerization	2	8	0.000576826	0.0109068	0.229043	2	3	0.000257666	9606	Homo sapiens	PGF;VEGFA		R-HSA-194310;R-HSA-194311
R-HSA-8941855	RUNX3 regulates CDKN1A transcription	2	8	0.000576826	0.0109068	0.229043	3	6	0.000515331	9606	Homo sapiens	CDKN1A		R-HSA-8878130;R-HSA-8878178;R-HSA-8878186
R-HSA-435368	Zinc efflux and compartmentalization by the SLC30 family	2	8	0.000576826	0.0109068	0.229043	2	7	0.00060122	9606	Homo sapiens	SLC30A3;SLC30A1		R-HSA-435366;R-HSA-437084
R-HSA-375165	NCAM signaling for neurite out-growth	5	69	0.00497512	0.011897	0.237941	12	23	0.00197544	9606	Homo sapiens	FLG;GDNF;FYN;CACNA1H;GULP1		R-HSA-392053;R-HSA-525833;R-HSA-392054;R-HSA-392051;R-HSA-391868;R-HSA-391871;R-HSA-375151;R-HSA-391865;R-HSA-375144;R-HSA-391867;R-HSA-391866;R-HSA-419033
R-HSA-1839120	Signaling by FGFR1 amplification mutants	2	9	0.000648929	0.0136296	0.272592	5	5	0.000429443	9606	Homo sapiens	FLG		R-HSA-5654544;R-HSA-5654545;R-HSA-2023462;R-HSA-1982066;R-HSA-1982065
R-HSA-139915	Activation of PUMA and translocation to mitochondria	2	10	0.000721033	0.0166145	0.315676	5	5	0.000429443	9606	Homo sapiens	BBC3		R-HSA-139914;R-HSA-139913;R-HSA-4331324;R-HSA-4331340;R-HSA-140221
R-HSA-5673001	RAF/MAP kinase cascade	11	270	0.0194679	0.0179049	0.317608	6	39	0.00334965	9606	Homo sapiens	FLG;KITLG;DUSP10;CSF2;GDNF;FYN;RASAL2;GRIN2C;RASGRP1;RAPSN		R-HSA-5658231;R-HSA-5672965;R-HSA-5658435;R-HSA-5675376;R-HSA-5658430;R-HSA-5675373
R-HSA-109606	Intrinsic Pathway for Apoptosis	4	52	0.00374937	0.0195192	0.317608	12	47	0.00403676	9606	Homo sapiens	PMAIP1;BBC3		R-HSA-4331331;R-HSA-508163;R-HSA-140214;R-HSA-508162;R-HSA-139914;R-HSA-140216;R-HSA-139913;R-HSA-140217;R-HSA-4331327;R-HSA-4331324;R-HSA-4331340;R-HSA-140221
R-HSA-8864260	Transcriptional regulation by the AP-2 (TFAP2) family of transcription factors	4	52	0.00374937	0.0195192	0.317608	5	44	0.00377909	9606	Homo sapiens	CDKN1A;VEGFA		R-HSA-8864737;R-HSA-8865280;R-HSA-8865244;R-HSA-8864936;R-HSA-8865256
R-HSA-446107	Type I hemidesmosome assembly	2	11	0.000793136	0.0198505	0.317608	5	6	0.000515331	9606	Homo sapiens	COL17A1;LAMC2		R-HSA-446083;R-HSA-432956;R-HSA-446077;R-HSA-432952;R-HSA-446089
R-HSA-111453	BH3-only proteins associate with and inactivate anti-apoptotic BCL-2 members	2	11	0.000793136	0.0198505	0.317608	2	4	0.000343554	9606	Homo sapiens	PMAIP1;BBC3		R-HSA-508163;R-HSA-508162
R-HSA-8939246	RUNX1 regulates transcription of genes involved in differentiation of myeloid cells	2	11	0.000793136	0.0198505	0.317608	2	7	0.00060122	9606	Homo sapiens	CSF2		R-HSA-8938251;R-HSA-8938228
R-HSA-5684996	MAPK1/MAPK3 signaling	11	277	0.0199726	0.0211229	0.321328	6	46	0.00395087	9606	Homo sapiens	FLG;KITLG;DUSP10;CSF2;GDNF;FYN;RASAL2;GRIN2C;RASGRP1;RAPSN		R-HSA-5658231;R-HSA-5672965;R-HSA-5658435;R-HSA-5675376;R-HSA-5658430;R-HSA-5675373
R-HSA-211999	CYP2E1 reactions	3	30	0.0021631	0.0214219	0.321328	6	6	0.000515331	9606	Homo sapiens	CYP2C9		R-HSA-76416;R-HSA-76354;R-HSA-76434;R-HSA-76475;R-HSA-76397;R-HSA-143468
R-HSA-1296065	Inwardly rectifying K+ channels	3	34	0.00245151	0.0294861	0.442292	4	5	0.000429443	9606	Homo sapiens	KCNJ11;ABCC9;KCNJ2		R-HSA-1013020;R-HSA-1296024;R-HSA-1369017;R-HSA-1296046
R-HSA-1839122	Signaling by activated point mutants of FGFR1	2	15	0.00108155	0.0350954	0.491336	4	4	0.000343554	9606	Homo sapiens	FLG		R-HSA-2023455;R-HSA-2023451;R-HSA-2023460;R-HSA-2023456
R-HSA-381183	ATF6 (ATF6-alpha) activates chaperone genes	2	15	0.00108155	0.0350954	0.491336	1	5	0.000429443	9606	Homo sapiens	DDIT3		R-HSA-1791107
R-HSA-1234158	Regulation of gene expression by Hypoxia-inducible Factor	2	15	0.00108155	0.0350954	0.491336	1	7	0.00060122	9606	Homo sapiens	VEGFA		R-HSA-1235037
R-HSA-4420097	VEGFA-VEGFR2 Pathway	6	125	0.00901291	0.0370013	0.494799	55	77	0.00661342	9606	Homo sapiens	NCF1;NOS3;ITPR1;FYN;TRIB3;VEGFA		R-HSA-202127;R-HSA-202129;R-HSA-5218645;R-HSA-202137;R-HSA-5218643;R-HSA-5218642;R-HSA-5218640;R-HSA-202144;R-HSA-5357429;R-HSA-5357432;R-HSA-4420202;R-HSA-4420206;R-HSA-1497784;R-HSA-4420083;R-HSA-5218815;R-HSA-5218814;R-HSA-5218812;R-HSA-5218811;R-HSA-5218809;R-HSA-5218806;R-HSA-5218804;R-HSA-4420099;R-HSA-5218830;R-HSA-5218828;R-HSA-5218827;R-HSA-5218826;R-HSA-5218824;R-HSA-4420107;R-HSA-52188…
R-HSA-446728	Cell junction organization	5	94	0.00677771	0.0380615	0.494799	12	37	0.00317788	9606	Homo sapiens	COL17A1;CLDN14;LAMC2;NECTIN4;NECTIN1		R-HSA-420582;R-HSA-420598;R-HSA-420580;R-HSA-446083;R-HSA-419011;R-HSA-420019;R-HSA-433711;R-HSA-432956;R-HSA-446077;R-HSA-419003;R-HSA-432952;R-HSA-446089
R-HSA-5678420	Defective ABCC9 causes dilated cardiomyopathy 10, familial atrial fibrillation 12 and hypertrichotic osteochondrodysplasia	1	2	0.000144207	0.0381902	0.496473	1	1	8.58885e-05	9606	Homo sapiens	ABCC9		R-HSA-5678418
R-HSA-381119	Unfolded Protein Response (UPR)	7	160	0.0115365	0.0386952	0.503038	8	95	0.00815941	9606	Homo sapiens	ERN1;DDIT3;ASNS;ATF3		R-HSA-381109;R-HSA-381217;R-HSA-1791118;R-HSA-425923;R-HSA-381091;R-HSA-1791107;R-HSA-381116;R-HSA-1791173
R-HSA-2022090	Assembly of collagen fibrils and other multimeric structures	4	67	0.00483092	0.0431185	0.523507	5	26	0.0022331	9606	Homo sapiens	COL17A1;MMP3;LAMC2;GULP1		R-HSA-2213201;R-HSA-2213200;R-HSA-2213192;R-HSA-1474266;R-HSA-2396234
R-HSA-381033	ATF6 (ATF6-alpha) activates chaperones	2	17	0.00122576	0.0439603	0.523507	1	10	0.000858885	9606	Homo sapiens	DDIT3		R-HSA-1791107
R-HSA-449147	Signaling by Interleukins	19	640	0.0461461	0.0464571	0.523507	44	491	0.0421713	9606	Homo sapiens	IL32;CSF1R;CDKN1A;CSF2;IL36B;MMP3;IL18;HMOX1;FYN;NOD2;RAPSN;VEGFA		R-HSA-912527;R-HSA-9009485;R-HSA-6784160;R-HSA-6789615;R-HSA-448591;R-HSA-6797293;R-HSA-879942;R-HSA-914182;R-HSA-6787820;R-HSA-8848395;R-HSA-921155;R-HSA-8848392;R-HSA-508247;R-HSA-913374;R-HSA-913371;R-HSA-9009554;R-HSA-913424;R-HSA-913360;R-HSA-879917;R-HSA-449058;R-HSA-913451;R-HSA-209061;R-HSA-909738;R-HSA-450337;R-HSA-879909;R-HSA-879910;R-HSA-450346;R-HSA-879907;R-HSA-453111;R-HSA-6797268;…
R-HSA-1500931	Cell-Cell communication	6	133	0.00958973	0.0474041	0.523507	19	60	0.00515331	9606	Homo sapiens	COL17A1;CLDN14;LAMC2;FYN;NECTIN4;NECTIN1		R-HSA-420582;R-HSA-420580;R-HSA-373734;R-HSA-446083;R-HSA-419011;R-HSA-451758;R-HSA-433711;R-HSA-446089;R-HSA-420598;R-HSA-532603;R-HSA-420019;R-HSA-373747;R-HSA-8981534;R-HSA-373724;R-HSA-373727;R-HSA-432956;R-HSA-446077;R-HSA-419003;R-HSA-432952
R-HSA-1433559	Regulation of KIT signaling	2	18	0.00129786	0.0486709	0.523507	7	8	0.000687108	9606	Homo sapiens	KITLG;FYN		R-HSA-205319;R-HSA-1433506;R-HSA-1562640;R-HSA-1433410;R-HSA-205306;R-HSA-1470011;R-HSA-205244
R-HSA-435354	Zinc transporters	2	18	0.00129786	0.0486709	0.523507	2	13	0.00111655	9606	Homo sapiens	SLC30A3;SLC30A1		R-HSA-435366;R-HSA-437084
R-HSA-69563	p53-Dependent G1 DNA Damage Response	4	70	0.00504723	0.0491667	0.523507	7	22	0.00188955	9606	Homo sapiens	CDKN1A;RAPSN		R-HSA-6803411;R-HSA-69562;R-HSA-6803388;R-HSA-187934;R-HSA-6803403;R-HSA-264458;R-HSA-6803801
R-HSA-69580	p53-Dependent G1/S DNA damage checkpoint	4	70	0.00504723	0.0491667	0.523507	7	22	0.00188955	9606	Homo sapiens	CDKN1A;RAPSN		R-HSA-6803411;R-HSA-69562;R-HSA-6803388;R-HSA-187934;R-HSA-6803403;R-HSA-264458;R-HSA-6803801
R-HSA-69615	G1/S DNA Damage Checkpoints	4	72	0.00519143	0.0534454	0.523507	8	27	0.00231899	9606	Homo sapiens	CDKN1A;RAPSN		R-HSA-69600;R-HSA-6803411;R-HSA-69562;R-HSA-6803388;R-HSA-187934;R-HSA-6803403;R-HSA-264458;R-HSA-6803801
R-HSA-399955	SEMA3A-Plexin repulsion signaling by inhibiting Integrin adhesion	2	19	0.00136996	0.0535553	0.523507	6	8	0.000687108	9606	Homo sapiens	FYN;RND1		R-HSA-399942;R-HSA-399941;R-HSA-399934;R-HSA-399935;R-HSA-399933;R-HSA-399928
R-HSA-1474290	Collagen formation	5	104	0.00749874	0.0542179	0.523507	29	77	0.00661342	9606	Homo sapiens	COL17A1;MMP3;COL20A1;LAMC2;GULP1		R-HSA-8948232;R-HSA-2002460;R-HSA-8948234;R-HSA-8948224;R-HSA-8948226;R-HSA-8948228;R-HSA-1474266;R-HSA-8948230;R-HSA-8948231;R-HSA-1981128;R-HSA-2002440;R-HSA-1980233;R-HSA-1981120;R-HSA-8944215;R-HSA-1650808;R-HSA-2002428;R-HSA-2022073;R-HSA-2213192;R-HSA-8944225;R-HSA-2089971;R-HSA-2396234;R-HSA-1981104;R-HSA-2213201;R-HSA-2213200;R-HSA-8948219;R-HSA-2152276;R-HSA-8948222;R-HSA-8944240;R-HSA-1…
R-HSA-1839124	FGFR1 mutant receptor activation	3	44	0.00317254	0.055617	0.523507	11	25	0.00214721	9606	Homo sapiens	FLG		R-HSA-2023455;R-HSA-2023451;R-HSA-5654544;R-HSA-5654545;R-HSA-2023462;R-HSA-2023460;R-HSA-8853325;R-HSA-1982066;R-HSA-8853322;R-HSA-2023456;R-HSA-1982065
R-HSA-419037	NCAM1 interactions	3	44	0.00317254	0.055617	0.523507	3	10	0.000858885	9606	Homo sapiens	GDNF;CACNA1H;GULP1		R-HSA-525833;R-HSA-375151;R-HSA-375144
R-HSA-8948216	Collagen chain trimerization	3	44	0.00317254	0.055617	0.523507	3	28	0.00240488	9606	Homo sapiens	COL17A1;COL20A1;GULP1		R-HSA-8944240;R-HSA-8944225;R-HSA-8944215
R-HSA-5683177	Defective ABCC8 can cause hypoglycemias and hyperglycemias	1	3	0.00021631	0.0567368	0.523507	1	2	0.000171777	9606	Homo sapiens	KCNJ11		R-HSA-5683113
R-HSA-5683057	MAPK family signaling cascades	11	328	0.0236499	0.0583897	0.523507	7	86	0.00738641	9606	Homo sapiens	FLG;KITLG;DUSP10;CSF2;GDNF;FYN;RASAL2;GRIN2C;RASGRP1;RAPSN		R-HSA-5658231;R-HSA-5672965;R-HSA-5658435;R-HSA-5675376;R-HSA-5658430;R-HSA-5675373;R-HSA-5687112
R-HSA-2142816	Synthesis of (16-20)-hydroxyeicosatetraenoic acids (HETE)	2	20	0.00144207	0.058605	0.523507	1	3	0.000257666	9606	Homo sapiens	CYP2C9		R-HSA-2161814
R-HSA-190242	FGFR1 ligand binding and activation	2	21	0.00151417	0.063812	0.523507	6	7	0.00060122	9606	Homo sapiens	FLG		R-HSA-190256;R-HSA-191062;R-HSA-190245;R-HSA-190427;R-HSA-190268;R-HSA-190429
R-HSA-9027307	Biosynthesis of maresin-like SPMs	2	21	0.00151417	0.063812	0.523507	3	7	0.00060122	9606	Homo sapiens	CYP2C9		R-HSA-9027321;R-HSA-9027043;R-HSA-9027302
R-HSA-6804114	TP53 Regulates Transcription of Genes Involved in G2 Cell Cycle Arrest	2	21	0.00151417	0.063812	0.523507	4	11	0.000944774	9606	Homo sapiens	GADD45A		R-HSA-3215152;R-HSA-6791109;R-HSA-6791235;R-HSA-3215144
R-HSA-8866910	TFAP2 (AP-2) family regulates transcription of growth factors and their receptors	2	21	0.00151417	0.063812	0.523507	2	18	0.00154599	9606	Homo sapiens	VEGFA		R-HSA-8864737;R-HSA-8864936
R-HSA-109581	Apoptosis	7	180	0.0129786	0.0643535	0.523507	19	126	0.010822	9606	Homo sapiens	UNC5B;PMAIP1;TNFRSF10B;RAPSN;BBC3		R-HSA-211715;R-HSA-4331331;R-HSA-418852;R-HSA-508163;R-HSA-508162;R-HSA-141156;R-HSA-418849;R-HSA-139914;R-HSA-139913;R-HSA-3371359;R-HSA-4331340;R-HSA-139952;R-HSA-140214;R-HSA-140216;R-HSA-140217;R-HSA-3465448;R-HSA-4331327;R-HSA-4331324;R-HSA-140221
R-HSA-5654219	Phospholipase C-mediated cascade: FGFR1	2	22	0.00158627	0.0691683	0.523507	3	3	0.000257666	9606	Homo sapiens	FLG		R-HSA-5654167;R-HSA-5654165;R-HSA-5654149
R-HSA-109582	Hemostasis	22	806	0.0581152	0.0706248	0.523507	37	327	0.0280855	9606	Homo sapiens	F10;NOS3;ITPR1;TNFRSF10B;PSG11;SLC3A2;SERPINB8;RASGRP1;PIK3CG;VEGFA;SLC8A2;SLC7A5;CEACAM1;PSG4;MAFF;PSG6;FYN		R-HSA-139842;R-HSA-140736;R-HSA-418436;R-HSA-1008200;R-HSA-5635741;R-HSA-8870732;R-HSA-140686;R-HSA-139854;R-HSA-418442;R-HSA-9015111;R-HSA-114577;R-HSA-1008220;R-HSA-453200;R-HSA-158164;R-HSA-140825;R-HSA-9015122;R-HSA-159001;R-HSA-202717;R-HSA-375131;R-HSA-140700;R-HSA-202723;R-HSA-432295;R-HSA-140769;R-HSA-139941;R-HSA-481007;R-HSA-114600;R-HSA-140777;R-HSA-437162;R-HSA-210291;R-HSA-437118;R-H…
R-HSA-2142670	Synthesis of epoxy (EET) and dihydroxyeicosatrienoic acids (DHET)	2	23	0.00165837	0.0746664	0.523507	1	3	0.000257666	9606	Homo sapiens	CYP2C9		R-HSA-2161899
R-HSA-379716	Cytosolic tRNA aminoacylation	3	50	0.00360516	0.0751409	0.523507	3	21	0.00180366	9606	Homo sapiens	WARS;SARS;GARS		R-HSA-380048;R-HSA-379977;R-HSA-379992
R-HSA-5576891	Cardiac conduction	6	151	0.0108876	0.0768642	0.523507	7	26	0.0022331	9606	Homo sapiens	KCNJ11;ITPR1;ABCC9;ATP1A2;KCNJ2;SLC8A2		R-HSA-169683;R-HSA-5678261;R-HSA-5226904;R-HSA-425661;R-HSA-139854;R-HSA-1296046;R-HSA-936897
R-HSA-6805567	Keratinization	8	226	0.0162953	0.0768977	0.523507	19	34	0.00292021	9606	Homo sapiens	FLG;CSTA;KRT16;KRT34;IVL;RPTN		R-HSA-6806629;R-HSA-6805573;R-HSA-8849797;R-HSA-6814734;R-HSA-6810894;R-HSA-6814764;R-HSA-8934819;R-HSA-6805546;R-HSA-6806613;R-HSA-6810357;R-HSA-6814387;R-HSA-6811539;R-HSA-6810899;R-HSA-6806610;R-HSA-6809393;R-HSA-6809663;R-HSA-8942224;R-HSA-6814298;R-HSA-6810937
R-HSA-5357801	Programmed Cell Death	7	188	0.0135554	0.076953	0.523507	22	139	0.0119385	9606	Homo sapiens	UNC5B;PMAIP1;TNFRSF10B;RAPSN;BBC3		R-HSA-211715;R-HSA-3465429;R-HSA-4331331;R-HSA-418852;R-HSA-508163;R-HSA-508162;R-HSA-141156;R-HSA-418849;R-HSA-139914;R-HSA-139913;R-HSA-3371359;R-HSA-4331340;R-HSA-139952;R-HSA-140214;R-HSA-5675456;R-HSA-5213462;R-HSA-140216;R-HSA-140217;R-HSA-3465448;R-HSA-4331327;R-HSA-4331324;R-HSA-140221
R-HSA-9006934	Signaling by Receptor Tyrosine Kinases	15	518	0.0373495	0.0839206	0.523507	147	628	0.053938	9606	Homo sapiens	FLG;SH3GL3;KITLG;NCF1;NOS3;ITPR1;LAMC2;FYN;TRIB3;PGF;VEGFA;GULP1		R-HSA-205319;R-HSA-194310;R-HSA-194311;R-HSA-1562641;R-HSA-1562640;R-HSA-205321;R-HSA-1433374;R-HSA-9032582;R-HSA-9032601;R-HSA-5654596;R-HSA-205328;R-HSA-5654597;R-HSA-5654594;R-HSA-5654592;R-HSA-5218645;R-HSA-5218643;R-HSA-5218642;R-HSA-5654600;R-HSA-5218640;R-HSA-183072;R-HSA-5357429;R-HSA-1433395;R-HSA-190245;R-HSA-5357432;R-HSA-4420202;R-HSA-1470012;R-HSA-1470010;R-HSA-1470011;R-HSA-4420206;…
R-HSA-5655302	Signaling by FGFR1 in disease	3	53	0.00382147	0.08589	0.523507	21	35	0.0030061	9606	Homo sapiens	FLG		R-HSA-1839100;R-HSA-2023455;R-HSA-2023451;R-HSA-1839098;R-HSA-5654544;R-HSA-5654545;R-HSA-5655326;R-HSA-5655263;R-HSA-1839094;R-HSA-8853325;R-HSA-5655290;R-HSA-1982066;R-HSA-8853322;R-HSA-1982065;R-HSA-5655269;R-HSA-5655266;R-HSA-5655278;R-HSA-2023462;R-HSA-2023460;R-HSA-5655240;R-HSA-2023456
R-HSA-6783783	Interleukin-10 signaling	4	86	0.00620088	0.0887683	0.523507	1	15	0.00128833	9606	Homo sapiens	CSF2;IL18		R-HSA-6784160
R-HSA-389357	CD28 dependent PI3K/Akt signaling	2	26	0.00187468	0.0919377	0.523507	3	9	0.000772997	9606	Homo sapiens	FYN;TRIB3		R-HSA-389158;R-HSA-198640;R-HSA-388832
R-HSA-977347	Serine biosynthesis	2	26	0.00187468	0.0919377	0.523507	2	7	0.00060122	9606	Homo sapiens	PSAT1;PHGDH		R-HSA-977348;R-HSA-977333
R-HSA-449836	Other interleukin signaling	2	26	0.00187468	0.0919377	0.523507	4	19	0.00163188	9606	Homo sapiens	IL32;CSF1R		R-HSA-9009485;R-HSA-448591;R-HSA-9009554;R-HSA-6787820
R-HSA-210991	Basigin interactions	2	26	0.00187468	0.0919377	0.523507	1	10	0.000858885	9606	Homo sapiens	SLC7A5;SLC3A2		R-HSA-375131
R-HSA-8853336	Signaling by plasma membrane FGFR1 fusions	1	5	0.000360516	0.0927679	0.523507	2	2	0.000171777	9606	Homo sapiens	FLG		R-HSA-8853325;R-HSA-8853322
R-HSA-5603037	IRAK4 deficiency (TLR5)	1	5	0.000360516	0.0927679	0.523507	2	2	0.000171777	9606	Homo sapiens	TLR10		R-HSA-5602472;R-HSA-5602603
R-HSA-1296053	Classical Kir channels	1	5	0.000360516	0.0927679	0.523507	1	1	8.58885e-05	9606	Homo sapiens	KCNJ2		R-HSA-1296046
R-HSA-3700989	Transcriptional Regulation by TP53	14	486	0.0350422	0.0956581	0.523507	20	259	0.0222451	9606	Homo sapiens	CDKN1A;GADD45A;SESN2;PMAIP1;TNFRSF10B;BBC3		R-HSA-3215152;R-HSA-4331331;R-HSA-6791109;R-HSA-6791235;R-HSA-5631903;R-HSA-139913;R-HSA-6803403;R-HSA-4331340;R-HSA-5629189;R-HSA-5631941;R-HSA-5633414;R-HSA-5633441;R-HSA-6803411;R-HSA-140214;R-HSA-5629187;R-HSA-3215144;R-HSA-69562;R-HSA-6803388;R-HSA-187934;R-HSA-6803801
R-HSA-446652	Interleukin-1 family signaling	6	162	0.0116807	0.0990043	0.523507	10	78	0.0066993	9606	Homo sapiens	IL36B;IL18;NOD2;RAPSN		R-HSA-449058;R-HSA-8848370;R-HSA-209061;R-HSA-448703;R-HSA-6797293;R-HSA-168184;R-HSA-8848316;R-HSA-8848395;R-HSA-8848314;R-HSA-8848392
R-HSA-199418	Negative regulation of the PI3K/AKT network	5	126	0.00908501	0.101708	0.523507	2	10	0.000858885	9606	Homo sapiens	FLG;KITLG;FYN;TRIB3		R-HSA-199443;R-HSA-2316434
R-HSA-2219528	PI3K/AKT Signaling in Cancer	5	126	0.00908501	0.101708	0.523507	2	21	0.00180366	9606	Homo sapiens	FLG;KITLG;CDKN1A;FYN		R-HSA-2399969;R-HSA-2400009
R-HSA-5654689	PI-3K cascade:FGFR1	2	28	0.00201889	0.104031	0.523507	6	7	0.00060122	9606	Homo sapiens	FLG		R-HSA-5654692;R-HSA-5654596;R-HSA-5654594;R-HSA-5654690;R-HSA-5654592;R-HSA-5654591
R-HSA-189200	Cellular hexose transport	2	28	0.00201889	0.104031	0.523507	2	17	0.0014601	9606	Homo sapiens	SLC2A3		R-HSA-8981564;R-HSA-8981553
R-HSA-109704	PI3K Cascade	3	58	0.00418199	0.105144	0.523507	2	6	0.000515331	9606	Homo sapiens	FLG;TRIB3		R-HSA-109699;R-HSA-109700
R-HSA-5654688	SHC-mediated cascade:FGFR1	2	29	0.00209099	0.110231	0.523507	4	4	0.000343554	9606	Homo sapiens	FLG		R-HSA-5654582;R-HSA-5654597;R-HSA-5654573;R-HSA-5654600
R-HSA-9018682	Biosynthesis of maresins	2	29	0.00209099	0.110231	0.523507	3	13	0.00111655	9606	Homo sapiens	CYP2C9		R-HSA-9027321;R-HSA-9027043;R-HSA-9027302
R-HSA-140834	Extrinsic Pathway of Fibrin Clot Formation	1	6	0.00043262	0.110266	0.523507	4	8	0.000687108	9606	Homo sapiens	F10		R-HSA-140736;R-HSA-140769;R-HSA-140825;R-HSA-140777
R-HSA-390648	Muscarinic acetylcholine receptors	1	6	0.00043262	0.110266	0.523507	1	2	0.000171777	9606	Homo sapiens	CHRM4		R-HSA-390673
R-HSA-2219530	Constitutive Signaling by Aberrant PI3K in Cancer	4	95	0.00684981	0.116125	0.523507	1	2	0.000171777	9606	Homo sapiens	FLG;KITLG;FYN		R-HSA-2400009
R-HSA-5654693	FRS-mediated FGFR1 signaling	2	30	0.0021631	0.116526	0.523507	9	9	0.000772997	9606	Homo sapiens	FLG		R-HSA-5654578;R-HSA-5654575;R-HSA-5654586;R-HSA-5654587;R-HSA-5654571;R-HSA-5654584;R-HSA-5654392;R-HSA-8941623;R-HSA-5654569
R-HSA-5218921	VEGFR2 mediated cell proliferation	2	30	0.0021631	0.116526	0.523507	5	12	0.00103066	9606	Homo sapiens	ITPR1;VEGFA		R-HSA-169683;R-HSA-169680;R-HSA-4420202;R-HSA-4420121;R-HSA-4420153
R-HSA-1187000	Fertilization	2	31	0.0022352	0.12291	0.523507	3	9	0.000772997	9606	Homo sapiens	CATSPERG;ZP1		R-HSA-2534359;R-HSA-2534388;R-HSA-1297338
R-HSA-1989781	PPARA activates gene expression	6	174	0.012546	0.126589	0.523507	3	41	0.00352143	9606	Homo sapiens	FHL2;ANKRD1;TRIB3		R-HSA-1989767;R-HSA-1989747;R-HSA-1989779
R-HSA-9032759	NTRK2 activates RAC1	1	7	0.000504723	0.127428	0.523507	2	2	0.000171777	9606	Homo sapiens	FYN		R-HSA-9032761;R-HSA-9032798
R-HSA-190374	FGFR1c and Klotho ligand binding and activation	1	7	0.000504723	0.127428	0.523507	2	2	0.000171777	9606	Homo sapiens	FLG		R-HSA-191062;R-HSA-190268
R-HSA-203754	NOSIP mediated eNOS trafficking	1	7	0.000504723	0.127428	0.523507	2	2	0.000171777	9606	Homo sapiens	NOS3		R-HSA-203553;R-HSA-203680
R-HSA-9014826	Interleukin-36 pathway	1	7	0.000504723	0.127428	0.523507	2	3	0.000257666	9606	Homo sapiens	IL36B		R-HSA-8848316;R-HSA-8848314
R-HSA-448706	Interleukin-1 processing	1	7	0.000504723	0.127428	0.523507	2	5	0.000429443	9606	Homo sapiens	IL18		R-HSA-449058;R-HSA-448703
R-HSA-165158	Activation of AKT2	1	7	0.000504723	0.127428	0.523507	1	3	0.000257666	9606	Homo sapiens	TRIB3		R-HSA-109700
R-HSA-8866376	Reelin signalling pathway	1	7	0.000504723	0.127428	0.523507	1	4	0.000343554	9606	Homo sapiens	FYN		R-HSA-8855237
R-HSA-5357769	Caspase activation via extrinsic apoptotic signalling pathway	2	32	0.0023073	0.129376	0.523507	6	17	0.0014601	9606	Homo sapiens	UNC5B;TNFRSF10B		R-HSA-418852;R-HSA-139952;R-HSA-141156;R-HSA-418849;R-HSA-3465448;R-HSA-3371359
R-HSA-8874081	MET activates PTK2 signaling	2	32	0.0023073	0.129376	0.523507	1	5	0.000429443	9606	Homo sapiens	LAMC2;GULP1		R-HSA-8874079
R-HSA-112399	IRS-mediated signalling	3	64	0.00461461	0.130235	0.523507	2	9	0.000772997	9606	Homo sapiens	FLG;TRIB3		R-HSA-109699;R-HSA-109700
R-HSA-397014	Muscle contraction	7	216	0.0155743	0.131496	0.523507	11	39	0.00334965	9606	Homo sapiens	MYBPC1;KCNJ11;ITPR1;ABCC9;ATP1A2;KCNJ2;SLC8A2		R-HSA-390597;R-HSA-169683;R-HSA-5678261;R-HSA-390598;R-HSA-390593;R-HSA-390595;R-HSA-5226904;R-HSA-425661;R-HSA-139854;R-HSA-1296046;R-HSA-936897
R-HSA-400206	Regulation of lipid metabolism by Peroxisome proliferator-activated receptor alpha (PPARalpha)	6	176	0.0126902	0.131518	0.523507	3	44	0.00377909	9606	Homo sapiens	FHL2;ANKRD1;TRIB3		R-HSA-1989767;R-HSA-1989747;R-HSA-1989779
R-HSA-425410	Metal ion SLC transporters	2	33	0.00237941	0.13592	0.523507	2	20	0.00171777	9606	Homo sapiens	SLC30A3;SLC30A1		R-HSA-435366;R-HSA-437084
R-HSA-421270	Cell-cell junction organization	3	67	0.00483092	0.1435	0.523507	7	21	0.00180366	9606	Homo sapiens	CLDN14;NECTIN4;NECTIN1		R-HSA-420582;R-HSA-420598;R-HSA-420580;R-HSA-419011;R-HSA-420019;R-HSA-433711;R-HSA-419003
R-HSA-352230	Amino acid transport across the plasma membrane	3	68	0.00490302	0.148018	0.523507	7	36	0.00309199	9606	Homo sapiens	SLC7A5;SLC6A15;SLC3A2		R-HSA-379415;R-HSA-378513;R-HSA-379426;R-HSA-352191;R-HSA-352232;R-HSA-376200;R-HSA-352059
R-HSA-2428928	IRS-related events triggered by IGF1R	3	68	0.00490302	0.148018	0.523507	2	11	0.000944774	9606	Homo sapiens	FLG;TRIB3		R-HSA-109699;R-HSA-109700
R-HSA-379724	tRNA Aminoacylation	3	68	0.00490302	0.148018	0.523507	4	42	0.00360732	9606	Homo sapiens	WARS;SARS;GARS		R-HSA-380048;R-HSA-380240;R-HSA-379977;R-HSA-379992
R-HSA-418990	Adherens junctions interactions	2	35	0.00252361	0.149218	0.523507	6	16	0.00137422	9606	Homo sapiens	NECTIN4;NECTIN1		R-HSA-420582;R-HSA-420598;R-HSA-420580;R-HSA-419011;R-HSA-433711;R-HSA-419003
R-HSA-418360	Platelet calcium homeostasis	2	35	0.00252361	0.149218	0.523507	2	8	0.000687108	9606	Homo sapiens	ITPR1;SLC8A2		R-HSA-425661;R-HSA-139854
R-HSA-1442490	Collagen degradation	3	69	0.00497512	0.152582	0.523507	14	34	0.00292021	9606	Homo sapiens	COL17A1;MMP3;GULP1		R-HSA-2168960;R-HSA-1474197;R-HSA-1564179;R-HSA-1564120;R-HSA-1564184;R-HSA-2485111;R-HSA-1474213;R-HSA-1454757;R-HSA-1474210;R-HSA-2473584;R-HSA-2484882;R-HSA-1564142;R-HSA-2168923;R-HSA-2537499
R-HSA-392154	Nitric oxide stimulates guanylate cyclase	2	36	0.00259572	0.155963	0.523507	2	7	0.00060122	9606	Homo sapiens	NOS3;ITPR1		R-HSA-418436;R-HSA-418442
R-HSA-190370	FGFR1b ligand binding and activation	1	9	0.000648929	0.160768	0.523507	2	2	0.000171777	9606	Homo sapiens	FLG		R-HSA-190245;R-HSA-190427
R-HSA-350864	Regulation of thyroid hormone activity	1	9	0.000648929	0.160768	0.523507	1	2	0.000171777	9606	Homo sapiens	DIO2		R-HSA-209772
R-HSA-164944	Nef and signal transduction	1	9	0.000648929	0.160768	0.523507	1	5	0.000429443	9606	Homo sapiens	FYN		R-HSA-200908
R-HSA-159763	Transport of gamma-carboxylated protein precursors from the endoplasmic reticulum to the Golgi apparatus	1	9	0.000648929	0.160768	0.523507	1	9	0.000772997	9606	Homo sapiens	F10		R-HSA-159757
R-HSA-2428924	IGF1R signaling cascade	3	71	0.00511933	0.161841	0.523507	2	16	0.00137422	9606	Homo sapiens	FLG;TRIB3		R-HSA-109699;R-HSA-109700
R-HSA-74751	Insulin receptor signalling cascade	3	71	0.00511933	0.161841	0.523507	2	25	0.00214721	9606	Homo sapiens	FLG;TRIB3		R-HSA-109699;R-HSA-109700
R-HSA-2404192	Signaling by Type 1 Insulin-like Growth Factor 1 Receptor (IGF1R)	3	72	0.00519143	0.166532	0.523507	2	18	0.00154599	9606	Homo sapiens	FLG;TRIB3		R-HSA-109699;R-HSA-109700
R-HSA-211981	Xenobiotics	3	74	0.00533564	0.176034	0.523507	16	22	0.00188955	9606	Homo sapiens	CYP2C9		R-HSA-76416;R-HSA-76354;R-HSA-76453;R-HSA-211910;R-HSA-212005;R-HSA-212004;R-HSA-76456;R-HSA-211881;R-HSA-76397;R-HSA-143468;R-HSA-76434;R-HSA-211991;R-HSA-211988;R-HSA-76475;R-HSA-211929;R-HSA-211966
R-HSA-5083635	Defective B3GALTL causes Peters-plus syndrome (PpS)	2	39	0.00281203	0.176519	0.523507	1	1	8.58885e-05	9606	Homo sapiens	THSD1;ADAMTS20		R-HSA-6785565
R-HSA-168638	NOD1/2 Signaling Pathway	2	39	0.00281203	0.176519	0.523507	12	17	0.0014601	9606	Homo sapiens	TNFAIP3;NOD2		R-HSA-741386;R-HSA-688136;R-HSA-688985;R-HSA-688137;R-HSA-706479;R-HSA-622415;R-HSA-168405;R-HSA-708349;R-HSA-741395;R-HSA-741411;R-HSA-168184;R-HSA-168412
R-HSA-389356	CD28 co-stimulation	2	39	0.00281203	0.176519	0.523507	10	19	0.00163188	9606	Homo sapiens	FYN;TRIB3		R-HSA-389381;R-HSA-389348;R-HSA-389158;R-HSA-389350;R-HSA-198640;R-HSA-388832;R-HSA-388831;R-HSA-388814;R-HSA-389352;R-HSA-389354
R-HSA-5654726	Negative regulation of FGFR1 signaling	2	39	0.00281203	0.176519	0.523507	4	15	0.00128833	9606	Homo sapiens	FLG		R-HSA-5654514;R-HSA-5654672;R-HSA-5654560;R-HSA-5654673
R-HSA-203641	NOSTRIN mediated eNOS trafficking	1	10	0.000721033	0.176959	0.523507	4	4	0.000343554	9606	Homo sapiens	NOS3		R-HSA-203716;R-HSA-203625;R-HSA-203662;R-HSA-203565
R-HSA-428890	Role of ABL in ROBO-SLIT signaling	1	10	0.000721033	0.176959	0.523507	4	4	0.000343554	9606	Homo sapiens	ABL2		R-HSA-428885;R-HSA-428883;R-HSA-376141;R-HSA-428888
R-HSA-1169092	Activation of RAS in B cells	1	10	0.000721033	0.176959	0.523507	2	2	0.000171777	9606	Homo sapiens	RASGRP1		R-HSA-1168374;R-HSA-1168636
R-HSA-1300644	Interaction With The Zona Pellucida	1	10	0.000721033	0.176959	0.523507	1	1	8.58885e-05	9606	Homo sapiens	ZP1		R-HSA-1297338
R-HSA-418886	Netrin mediated repulsion signals	1	10	0.000721033	0.176959	0.523507	2	4	0.000343554	9606	Homo sapiens	UNC5B		R-HSA-373751;R-HSA-373713
R-HSA-888593	Reuptake of GABA	1	10	0.000721033	0.176959	0.523507	1	2	0.000171777	9606	Homo sapiens	SLC6A13		R-HSA-444007
R-HSA-159782	Removal of aminoterminal propeptides from gamma-carboxylated proteins	1	10	0.000721033	0.176959	0.523507	1	9	0.000772997	9606	Homo sapiens	F10		R-HSA-159733
R-HSA-114508	Effects of PIP2 hydrolysis	2	40	0.00288413	0.183463	0.523507	3	9	0.000772997	9606	Homo sapiens	ITPR1;RASGRP1		R-HSA-139941;R-HSA-392831;R-HSA-139854
R-HSA-1650814	Collagen biosynthesis and modifying enzymes	3	76	0.00547985	0.185682	0.523507	24	51	0.00438031	9606	Homo sapiens	COL17A1;COL20A1;GULP1		R-HSA-8948232;R-HSA-1650808;R-HSA-2002460;R-HSA-8948234;R-HSA-2002428;R-HSA-2022073;R-HSA-8948224;R-HSA-8944225;R-HSA-8948226;R-HSA-8948228;R-HSA-2089971;R-HSA-1981104;R-HSA-8948230;R-HSA-8948231;R-HSA-8948219;R-HSA-2152276;R-HSA-8948222;R-HSA-1981128;R-HSA-2002440;R-HSA-1980233;R-HSA-8944240;R-HSA-1981157;R-HSA-1981120;R-HSA-8944215
R-HSA-5173214	O-glycosylation of TSR domain-containing proteins	2	41	0.00295623	0.190447	0.523507	2	2	0.000171777	9606	Homo sapiens	THSD1;ADAMTS20		R-HSA-5173005;R-HSA-5173192
R-HSA-5654687	Downstream signaling of activated FGFR1	2	41	0.00295623	0.190447	0.523507	23	24	0.00206132	9606	Homo sapiens	FLG		R-HSA-5654582;R-HSA-5654167;R-HSA-5654165;R-HSA-5654578;R-HSA-5654591;R-HSA-5654586;R-HSA-5654587;R-HSA-5654584;R-HSA-5654392;R-HSA-5654692;R-HSA-5654596;R-HSA-5654597;R-HSA-5654149;R-HSA-5654594;R-HSA-5654690;R-HSA-5656064;R-HSA-5654592;R-HSA-5654575;R-HSA-5654573;R-HSA-5654571;R-HSA-5654600;R-HSA-8941623;R-HSA-5654569
R-HSA-9032500	Activated NTRK2 signals through FYN	1	11	0.000793136	0.192839	0.523507	7	7	0.00060122	9606	Homo sapiens	FYN		R-HSA-9032601;R-HSA-9032761;R-HSA-9032798;R-HSA-9037040;R-HSA-9032532;R-HSA-9032582;R-HSA-9032502
R-HSA-3371378	Regulation by c-FLIP	1	11	0.000793136	0.192839	0.523507	2	4	0.000343554	9606	Homo sapiens	TNFRSF10B		R-HSA-3465448;R-HSA-3371359
R-HSA-69416	Dimerization of procaspase-8	1	11	0.000793136	0.192839	0.523507	1	3	0.000257666	9606	Homo sapiens	TNFRSF10B		R-HSA-141156
R-HSA-6811558	PI5P, PP2A and IER3 Regulate PI3K/AKT Signaling	4	118	0.00850818	0.199473	0.523507	1	7	0.00060122	9606	Homo sapiens	FLG;KITLG;FYN		R-HSA-2316434
R-HSA-5689896	Ovarian tumor domain proteases	2	43	0.00310044	0.204516	0.523507	6	14	0.00120244	9606	Homo sapiens	TNFAIP3;NOD2		R-HSA-5690870;R-HSA-688136;R-HSA-8869506;R-HSA-5690845;R-HSA-5690827;R-HSA-5690856
R-HSA-114604	GPVI-mediated activation cascade	2	43	0.00310044	0.204516	0.523507	6	25	0.00214721	9606	Homo sapiens	FYN;PIK3CG		R-HSA-139842;R-HSA-453200;R-HSA-437118;R-HSA-114600;R-HSA-453183;R-HSA-437162
R-HSA-2179392	EGFR Transactivation by Gastrin	1	12	0.000865239	0.208413	0.523507	2	6	0.000515331	9606	Homo sapiens	MMP3		R-HSA-2179413;R-HSA-2179402
R-HSA-1433617	Regulation of signaling by NODAL	1	12	0.000865239	0.208413	0.523507	1	3	0.000257666	9606	Homo sapiens	ACVR1C		R-HSA-1181351
R-HSA-418889	via Dependence Receptors in the absence of ligand	1	12	0.000865239	0.208413	0.523507	2	8	0.000687108	9606	Homo sapiens	UNC5B		R-HSA-418852;R-HSA-418849
R-HSA-5218920	VEGFR2 mediated vascular permeability	2	44	0.00317254	0.211593	0.523507	8	15	0.00128833	9606	Homo sapiens	NOS3;TRIB3		R-HSA-202129;R-HSA-198640;R-HSA-202144;R-HSA-202137;R-HSA-202111;R-HSA-202127;R-HSA-202110;R-HSA-1497784
R-HSA-70614	Amino acid synthesis and interconversion (transamination)	3	82	0.00591247	0.215392	0.523507	3	35	0.0030061	9606	Homo sapiens	PSAT1;ASNS;PHGDH		R-HSA-70599;R-HSA-977348;R-HSA-977333
R-HSA-8875878	MET promotes cell motility	2	45	0.00324465	0.218694	0.523507	1	12	0.00103066	9606	Homo sapiens	LAMC2;GULP1		R-HSA-8874079
R-HSA-2262749	Cellular response to hypoxia	3	83	0.00598457	0.220441	0.523507	2	20	0.00171777	9606	Homo sapiens	RAPSN;VEGFA		R-HSA-1234159;R-HSA-1235037
R-HSA-1234174	Regulation of Hypoxia-inducible Factor (HIF) by oxygen	3	83	0.00598457	0.220441	0.523507	2	20	0.00171777	9606	Homo sapiens	RAPSN;VEGFA		R-HSA-1234159;R-HSA-1235037
R-HSA-425393	Transport of inorganic cations/anions and amino acids/oligopeptides	5	165	0.011897	0.220716	0.523507	9	75	0.00644164	9606	Homo sapiens	SLC7A5;SLC6A15;SLC3A2;SLC4A5;SLC8A2		R-HSA-379415;R-HSA-378513;R-HSA-379426;R-HSA-352191;R-HSA-425661;R-HSA-352232;R-HSA-376200;R-HSA-425483;R-HSA-352059
R-HSA-382556	ABC-family proteins mediated transport	4	124	0.0089408	0.223657	0.523507	4	28	0.00240488	9606	Homo sapiens	KCNJ11;ABCA4;ABCC9;RAPSN		R-HSA-1454916;R-HSA-5678261;R-HSA-1467466;R-HSA-8866553
R-HSA-1300642	Sperm Motility And Taxes	1	13	0.000937342	0.223688	0.523507	2	4	0.000343554	9606	Homo sapiens	CATSPERG		R-HSA-2534359;R-HSA-2534388
R-HSA-1236973	Cross-presentation of particulate exogenous antigens (phagosomes)	1	13	0.000937342	0.223688	0.523507	1	3	0.000257666	9606	Homo sapiens	NCF1		R-HSA-1236967
R-HSA-141334	PAOs oxidise polyamines to amines	1	13	0.000937342	0.223688	0.523507	1	3	0.000257666	9606	Homo sapiens	SMOX		R-HSA-141341
R-HSA-375281	Hormone ligand-binding receptors	1	13	0.000937342	0.223688	0.523507	1	4	0.000343554	9606	Homo sapiens	GNRH2		R-HSA-391372
R-HSA-416550	Sema4D mediated inhibition of cell attachment and migration	1	14	0.00100945	0.23867	0.523507	4	6	0.000515331	9606	Homo sapiens	RND1		R-HSA-400677;R-HSA-416562;R-HSA-416546;R-HSA-416559
R-HSA-5218900	CASP8 activity is inhibited	1	14	0.00100945	0.23867	0.523507	2	3	0.000257666	9606	Homo sapiens	TNFRSF10B		R-HSA-3465429;R-HSA-5675456
R-HSA-5357786	TNFR1-induced proapoptotic signaling	1	14	0.00100945	0.23867	0.523507	1	3	0.000257666	9606	Homo sapiens	TNFAIP3		R-HSA-140978
R-HSA-425381	Bicarbonate transporters	1	14	0.00100945	0.23867	0.523507	1	4	0.000343554	9606	Homo sapiens	SLC4A5		R-HSA-425483
R-HSA-196819	Vitamin B1 (thiamin) metabolism	1	14	0.00100945	0.23867	0.523507	1	5	0.000429443	9606	Homo sapiens	SLC19A2		R-HSA-199626
R-HSA-210990	PECAM1 interactions	1	14	0.00100945	0.23867	0.523507	1	7	0.00060122	9606	Homo sapiens	FYN		R-HSA-210291
R-HSA-75205	Dissolution of Fibrin Clot	1	14	0.00100945	0.23867	0.523507	1	19	0.00163188	9606	Homo sapiens	SERPINB8		R-HSA-159001
R-HSA-71240	Tryptophan catabolism	2	48	0.00346096	0.240105	0.523507	1	16	0.00137422	9606	Homo sapiens	SLC7A5;SLC3A2		R-HSA-352232
R-HSA-1226099	Signaling by FGFR in disease	3	87	0.00627298	0.240861	0.523507	21	106	0.00910418	9606	Homo sapiens	FLG		R-HSA-1839100;R-HSA-2023455;R-HSA-2023451;R-HSA-1839098;R-HSA-5654544;R-HSA-5654545;R-HSA-5655326;R-HSA-5655263;R-HSA-1839094;R-HSA-8853325;R-HSA-5655290;R-HSA-1982066;R-HSA-8853322;R-HSA-1982065;R-HSA-5655269;R-HSA-5655266;R-HSA-5655278;R-HSA-2023462;R-HSA-2023460;R-HSA-5655240;R-HSA-2023456
R-HSA-6806834	Signaling by MET	3	87	0.00627298	0.240861	0.523507	3	49	0.00420854	9606	Homo sapiens	SH3GL3;LAMC2;GULP1		R-HSA-8875490;R-HSA-8874079;R-HSA-8875482
R-HSA-190373	FGFR1c ligand binding and activation	1	15	0.00108155	0.253363	0.523507	2	3	0.000257666	9606	Homo sapiens	FLG		R-HSA-190256;R-HSA-190429
R-HSA-418359	Reduction of cytosolic Ca++ levels	1	15	0.00108155	0.253363	0.523507	1	3	0.000257666	9606	Homo sapiens	SLC8A2		R-HSA-425661
R-HSA-1502540	Signaling by Activin	1	15	0.00108155	0.253363	0.523507	3	10	0.000858885	9606	Homo sapiens	ACVR1C		R-HSA-1549526;R-HSA-2470483;R-HSA-2470508
R-HSA-2214320	Anchoring fibril formation	1	15	0.00108155	0.253363	0.523507	1	4	0.000343554	9606	Homo sapiens	LAMC2		R-HSA-2396234
R-HSA-425561	Sodium/Calcium exchangers	1	15	0.00108155	0.253363	0.523507	1	4	0.000343554	9606	Homo sapiens	SLC8A2		R-HSA-425661
R-HSA-159740	Gamma-carboxylation of protein precursors	1	15	0.00108155	0.253363	0.523507	1	9	0.000772997	9606	Homo sapiens	F10		R-HSA-159819
R-HSA-1433557	Signaling by SCF-KIT	2	50	0.00360516	0.254436	0.523507	33	36	0.00309199	9606	Homo sapiens	KITLG;FYN		R-HSA-1433428;R-HSA-205319;R-HSA-1433488;R-HSA-1562641;R-HSA-1562640;R-HSA-1433501;R-HSA-205321;R-HSA-1433374;R-HSA-205262;R-HSA-1433542;R-HSA-205328;R-HSA-205205;R-HSA-1433410;R-HSA-1433418;R-HSA-1433456;R-HSA-205286;R-HSA-1433395;R-HSA-1470012;R-HSA-205289;R-HSA-1433471;R-HSA-1470010;R-HSA-205231;R-HSA-1470011;R-HSA-1472121;R-HSA-1470009;R-HSA-205234;R-HSA-205238;R-HSA-1433506;R-HSA-205306;R-HS…
R-HSA-512988	Interleukin-3, Interleukin-5 and GM-CSF signaling	2	50	0.00360516	0.254436	0.523507	24	38	0.00326376	9606	Homo sapiens	CSF2;FYN		R-HSA-879917;R-HSA-912527;R-HSA-913451;R-HSA-909738;R-HSA-879909;R-HSA-879942;R-HSA-914182;R-HSA-879910;R-HSA-921155;R-HSA-879907;R-HSA-508247;R-HSA-453111;R-HSA-913374;R-HSA-879934;R-HSA-453104;R-HSA-913371;R-HSA-879930;R-HSA-912629;R-HSA-879925;R-HSA-912757;R-HSA-914036;R-HSA-913424;R-HSA-913360;R-HSA-912627
R-HSA-442660	Na+/Cl- dependent neurotransmitter transporters	2	50	0.00360516	0.254436	0.523507	2	15	0.00128833	9606	Homo sapiens	SLC6A15;SLC6A13		R-HSA-444007;R-HSA-352059
R-HSA-1222556	ROS, RNS production in phagocytes	2	51	0.00367727	0.26161	0.523507	2	12	0.00103066	9606	Homo sapiens	NCF1;NOS3		R-HSA-418436;R-HSA-1222376
R-HSA-3000484	Scavenging by Class F Receptors	1	16	0.00115365	0.267774	0.523507	2	2	0.000171777	9606	Homo sapiens	SCARF1		R-HSA-2247514;R-HSA-2197645
R-HSA-75892	Platelet Adhesion to exposed collagen	1	16	0.00115365	0.267774	0.523507	2	6	0.000515331	9606	Homo sapiens	FYN		R-HSA-114577;R-HSA-432295
R-HSA-351200	Interconversion of polyamines	1	16	0.00115365	0.267774	0.523507	1	7	0.00060122	9606	Homo sapiens	SMOX		R-HSA-141341
R-HSA-159854	Gamma-carboxylation, transport, and amino-terminal cleavage of proteins	1	16	0.00115365	0.267774	0.523507	3	27	0.00231899	9606	Homo sapiens	F10		R-HSA-159733;R-HSA-159819;R-HSA-159757
R-HSA-198323	AKT phosphorylates targets in the cytosol	1	16	0.00115365	0.267774	0.523507	1	9	0.000772997	9606	Homo sapiens	CDKN1A		R-HSA-198613
R-HSA-389359	CD28 dependent Vav1 pathway	1	17	0.00122576	0.281908	0.523507	5	6	0.000515331	9606	Homo sapiens	FYN		R-HSA-389348;R-HSA-389350;R-HSA-388814;R-HSA-389352;R-HSA-389354
R-HSA-2559584	Formation of Senescence-Associated Heterochromatin Foci (SAHF)	1	17	0.00122576	0.281908	0.523507	1	2	0.000171777	9606	Homo sapiens	CDKN1A		R-HSA-4647594
R-HSA-425407	SLC-mediated transmembrane transport	10	412	0.0297065	0.284095	0.523507	14	184	0.0158035	9606	Homo sapiens	SLC7A5;SLC30A3;SLC6A15;SLC6A13;SLC30A1;SLC2A3;SLC3A2;SLC4A5;SLC8A2		R-HSA-435366;R-HSA-444007;R-HSA-379426;R-HSA-352232;R-HSA-376200;R-HSA-425483;R-HSA-379415;R-HSA-378513;R-HSA-8981564;R-HSA-8981553;R-HSA-437084;R-HSA-352191;R-HSA-425661;R-HSA-352059
R-HSA-74752	Signaling by Insulin receptor	3	96	0.00692191	0.287772	0.523507	2	34	0.00292021	9606	Homo sapiens	FLG;TRIB3		R-HSA-109699;R-HSA-109700
R-HSA-399956	CRMPs in Sema3A signaling	1	18	0.00129786	0.295769	0.523507	5	5	0.000429443	9606	Homo sapiens	FYN		R-HSA-399951;R-HSA-399946;R-HSA-399947;R-HSA-399931;R-HSA-399944
R-HSA-5607763	CLEC7A (Dectin-1) induces NFAT activation	1	18	0.00129786	0.295769	0.523507	2	6	0.000515331	9606	Homo sapiens	ITPR1		R-HSA-169683;R-HSA-169680
R-HSA-8875360	InlB-mediated entry of Listeria monocytogenes into host cell	1	18	0.00129786	0.295769	0.523507	2	8	0.000687108	9606	Homo sapiens	SH3GL3		R-HSA-8876262;R-HSA-8876255
R-HSA-5619084	ABC transporter disorders	3	98	0.00706612	0.29831	0.523507	3	22	0.00188955	9606	Homo sapiens	KCNJ11;ABCC9;RAPSN		R-HSA-5678418;R-HSA-8866858;R-HSA-5683113
R-HSA-450385	Butyrate Response Factor 1 (BRF1) binds and destabilizes mRNA	1	19	0.00136996	0.309365	0.523507	6	6	0.000515331	9606	Homo sapiens	ZFP36L1		R-HSA-450406;R-HSA-450517;R-HSA-482788;R-HSA-450474;R-HSA-450490;R-HSA-450488
R-HSA-418885	DCC mediated attractive signaling	1	19	0.00136996	0.309365	0.523507	8	12	0.00103066	9606	Homo sapiens	FYN		R-HSA-373716;R-HSA-418868;R-HSA-418850;R-HSA-418865;R-HSA-374701;R-HSA-418874;R-HSA-418858;R-HSA-418856
R-HSA-399954	Sema3A PAK dependent Axon repulsion	1	19	0.00136996	0.309365	0.523507	3	6	0.000515331	9606	Homo sapiens	FYN		R-HSA-399939;R-HSA-399952;R-HSA-399930
R-HSA-2485179	Activation of the phototransduction cascade	1	19	0.00136996	0.309365	0.523507	2	8	0.000687108	9606	Homo sapiens	PDE6G		R-HSA-74065;R-HSA-74059
R-HSA-2142712	Synthesis of 12-eicosatetraenoic acid derivatives	1	19	0.00136996	0.309365	0.523507	1	6	0.000515331	9606	Homo sapiens	ALOXE3		R-HSA-8942208
R-HSA-373752	Netrin-1 signaling	2	59	0.00425409	0.318838	0.523507	11	37	0.00317788	9606	Homo sapiens	UNC5B;FYN		R-HSA-373716;R-HSA-418868;R-HSA-373751;R-HSA-418850;R-HSA-373713;R-HSA-418865;R-HSA-374701;R-HSA-418874;R-HSA-418858;R-HSA-622357;R-HSA-418856
R-HSA-382551	Transport of small molecules	21	960	0.0692191	0.322061	0.523507	27	430	0.0369321	9606	Homo sapiens	SLC30A3;KCNJ11;SLC6A15;ABCA4;SLC6A13;SLC30A1;ATP1A2;SLC2A3;ABCC9;SLC3A2;ANO2;SLC4A5;SLC8A2;BEST1;CLCN7;SLC7A5;AZGP1;NPC1;HMOX1;RAPSN		R-HSA-2744361;R-HSA-8876485;R-HSA-8876484;R-HSA-2684901;R-HSA-376200;R-HSA-425483;R-HSA-936897;R-HSA-1454916;R-HSA-379415;R-HSA-189398;R-HSA-378513;R-HSA-437084;R-HSA-1467466;R-HSA-435366;R-HSA-444007;R-HSA-5678261;R-HSA-2730959;R-HSA-379426;R-HSA-2752067;R-HSA-352232;R-HSA-8981564;R-HSA-8981553;R-HSA-5252072;R-HSA-352191;R-HSA-425661;R-HSA-352059;R-HSA-8866553
R-HSA-5576886	Phase 4 - resting membrane potential	1	20	0.00144207	0.322698	0.523507	1	2	0.000171777	9606	Homo sapiens	KCNJ2		R-HSA-1296046
R-HSA-140534	via Death Receptors in the presence of ligand	1	20	0.00144207	0.322698	0.523507	4	9	0.000772997	9606	Homo sapiens	TNFRSF10B		R-HSA-139952;R-HSA-141156;R-HSA-3465448;R-HSA-3371359
R-HSA-442729	CREB phosphorylation through the activation of CaMKII	1	20	0.00144207	0.322698	0.523507	1	4	0.000343554	9606	Homo sapiens	GRIN2C		R-HSA-445367
R-HSA-418457	cGMP effects	1	20	0.00144207	0.322698	0.523507	1	4	0.000343554	9606	Homo sapiens	ITPR1		R-HSA-418442
R-HSA-189483	Heme degradation	1	20	0.00144207	0.322698	0.523507	1	5	0.000429443	9606	Homo sapiens	HMOX1		R-HSA-189398
R-HSA-196836	Vitamin C (ascorbate) metabolism	1	20	0.00144207	0.322698	0.523507	1	5	0.000429443	9606	Homo sapiens	SLC2A3		R-HSA-198818
R-HSA-1296071	Potassium Channels	3	103	0.00742663	0.324733	0.523507	4	17	0.0014601	9606	Homo sapiens	KCNJ11;ABCC9;KCNJ2		R-HSA-1013020;R-HSA-1296024;R-HSA-1369017;R-HSA-1296046
R-HSA-1474228	Degradation of the extracellular matrix	4	148	0.0106713	0.326038	0.523507	34	105	0.00901829	9606	Homo sapiens	COL17A1;MMP3;LAMC2;GULP1		R-HSA-4086205;R-HSA-1474197;R-HSA-1564179;R-HSA-3791295;R-HSA-1604752;R-HSA-3791155;R-HSA-1604690;R-HSA-2534248;R-HSA-1564120;R-HSA-1564184;R-HSA-2485111;R-HSA-1566981;R-HSA-1566979;R-HSA-3791149;R-HSA-2473584;R-HSA-2168960;R-HSA-1592314;R-HSA-1604731;R-HSA-1566962;R-HSA-1454781;R-HSA-1592371;R-HSA-1592436;R-HSA-1454843;R-HSA-1592297;R-HSA-2514772;R-HSA-1592362;R-HSA-1474213;R-HSA-1454757;R-HSA-1…
R-HSA-983705	Signaling by the B Cell Receptor (BCR)	5	195	0.0140601	0.33114	0.523507	12	35	0.0030061	9606	Homo sapiens	ITPR1;FYN;RASGRP1;CD22;RAPSN		R-HSA-169683;R-HSA-1168640;R-HSA-983709;R-HSA-5690740;R-HSA-169680;R-HSA-983707;R-HSA-1168374;R-HSA-5690702;R-HSA-1168376;R-HSA-5690701;R-HSA-5690669;R-HSA-1168636
R-HSA-5654736	Signaling by FGFR1	2	61	0.0043983	0.333014	0.523507	33	48	0.00412265	9606	Homo sapiens	FLG		R-HSA-5654167;R-HSA-5654165;R-HSA-5654672;R-HSA-5654673;R-HSA-5654596;R-HSA-5654597;R-HSA-5654149;R-HSA-5654594;R-HSA-191062;R-HSA-5656064;R-HSA-5654592;R-HSA-190427;R-HSA-5654600;R-HSA-190429;R-HSA-5654582;R-HSA-5654578;R-HSA-5654514;R-HSA-190245;R-HSA-5654591;R-HSA-5654586;R-HSA-5654587;R-HSA-5654584;R-HSA-5654392;R-HSA-5654692;R-HSA-190256;R-HSA-5654690;R-HSA-5654560;R-HSA-5654575;R-HSA-565457…
R-HSA-3000171	Non-integrin membrane-ECM interactions	2	61	0.0043983	0.333014	0.523507	4	22	0.00188955	9606	Homo sapiens	LAMC2;GULP1		R-HSA-2328129;R-HSA-2465890;R-HSA-2327738;R-HSA-2731075
R-HSA-5675482	Regulation of necroptotic cell death	1	21	0.00151417	0.335776	0.523507	2	5	0.000429443	9606	Homo sapiens	TNFRSF10B		R-HSA-3465429;R-HSA-5675456
R-HSA-187577	SCF(Skp2)-mediated degradation of p27/p21	2	62	0.0044704	0.340071	0.523507	4	7	0.00060122	9606	Homo sapiens	CDKN1A;RAPSN		R-HSA-187520;R-HSA-187552;R-HSA-187574;R-HSA-187575
R-HSA-442982	Ras activation upon Ca2+ influx through NMDA receptor	1	22	0.00158627	0.348601	0.523507	2	2	0.000171777	9606	Homo sapiens	GRIN2C		R-HSA-442732;R-HSA-442760
R-HSA-438066	Unblocking of NMDA receptor, glutamate binding and activation	1	22	0.00158627	0.348601	0.523507	3	4	0.000343554	9606	Homo sapiens	GRIN2C		R-HSA-432164;R-HSA-432162;R-HSA-432172
R-HSA-139853	Elevation of cytosolic Ca2+ levels	1	22	0.00158627	0.348601	0.523507	1	5	0.000429443	9606	Homo sapiens	ITPR1		R-HSA-139854
R-HSA-140179	Amine Oxidase reactions	1	22	0.00158627	0.348601	0.523507	1	6	0.000515331	9606	Homo sapiens	SMOX		R-HSA-141341
R-HSA-983695	Antigen activates B Cell Receptor (BCR) leading to generation of second messengers	3	108	0.00778715	0.351159	0.523507	5	17	0.0014601	9606	Homo sapiens	ITPR1;FYN;CD22		R-HSA-169683;R-HSA-983709;R-HSA-169680;R-HSA-983707;R-HSA-1168376
R-HSA-1266738	Developmental Biology	25	1176	0.0847934	0.353027	0.523507	127	484	0.04157	9606	Homo sapiens	FLG;EGR2;CSTA;UNC5B;KRT34;MAFA;CACNA1H;GULP1;RND1;ACVR1C;GDNF;KRT16;HNF4A;ABL2;FYN;IVL;RAPSN;RPTN		R-HSA-5617492;R-HSA-525833;R-HSA-3928633;R-HSA-6806629;R-HSA-8849797;R-HSA-3928639;R-HSA-3928627;R-HSA-211466;R-HSA-3928625;R-HSA-3928631;R-HSA-3928628;R-HSA-3928623;R-HSA-8942224;R-HSA-5617484;R-HSA-5617486;R-HSA-3928615;R-HSA-622357;R-HSA-3928614;R-HSA-5617483;R-HSA-3928602;R-HSA-6805573;R-HSA-400677;R-HSA-418850;R-HSA-3928607;R-HSA-416546;R-HSA-3928604;R-HSA-3928594;R-HSA-416559;R-HSA-8934819;…
R-HSA-3928664	Ephrin signaling	1	23	0.00165837	0.36118	0.523507	10	11	0.000944774	9606	Homo sapiens	FYN		R-HSA-3928633;R-HSA-3928639;R-HSA-3928594;R-HSA-3928625;R-HSA-3928641;R-HSA-3928640;R-HSA-3928631;R-HSA-3928615;R-HSA-3928614;R-HSA-3928580
R-HSA-8849932	Synaptic adhesion-like molecules	1	23	0.00165837	0.36118	0.523507	3	8	0.000687108	9606	Homo sapiens	GRIN2C		R-HSA-8849878;R-HSA-8849906;R-HSA-8849881
R-HSA-1181150	Signaling by NODAL	1	23	0.00165837	0.36118	0.523507	4	12	0.00103066	9606	Homo sapiens	ACVR1C		R-HSA-1181155;R-HSA-1225894;R-HSA-1181351;R-HSA-1181355
R-HSA-881907	Gastrin-CREB signalling pathway via PKC and MAPK	1	23	0.00165837	0.36118	0.523507	2	9	0.000772997	9606	Homo sapiens	MMP3		R-HSA-2179413;R-HSA-2179402
R-HSA-9006925	Intracellular signaling by second messengers	8	347	0.0250198	0.364415	0.523507	7	104	0.00893241	9606	Homo sapiens	FLG;KITLG;CDKN1A;ITPR1;FYN;TRIB3;RAPSN		R-HSA-199443;R-HSA-2316434;R-HSA-169683;R-HSA-169680;R-HSA-198640;R-HSA-198613;R-HSA-8850992
R-HSA-912631	Regulation of signaling by CBL	1	24	0.00173048	0.373517	0.523507	3	7	0.00060122	9606	Homo sapiens	FYN		R-HSA-879917;R-HSA-912629;R-HSA-912627
R-HSA-416572	Sema4D induced cell migration and growth-cone collapse	1	24	0.00173048	0.373517	0.523507	2	6	0.000515331	9606	Homo sapiens	RND1		R-HSA-416594;R-HSA-416588
R-HSA-392517	Rap1 signalling	1	24	0.00173048	0.373517	0.523507	1	7	0.00060122	9606	Homo sapiens	RASGRP1		R-HSA-354173
R-HSA-192456	Digestion of dietary lipid	1	24	0.00173048	0.373517	0.523507	1	8	0.000687108	9606	Homo sapiens	PNLIPRP3		R-HSA-8979996
R-HSA-5668599	RHO GTPases Activate NADPH Oxidases	1	25	0.00180258	0.385617	0.523507	6	9	0.000772997	9606	Homo sapiens	NCF1		R-HSA-5668629;R-HSA-5218827;R-HSA-5218841;R-HSA-5668735;R-HSA-5668605;R-HSA-5668731
R-HSA-373753	Nephrin family interactions	1	25	0.00180258	0.385617	0.523507	7	13	0.00111655	9606	Homo sapiens	FYN		R-HSA-532603;R-HSA-373734;R-HSA-373747;R-HSA-8981534;R-HSA-451758;R-HSA-373724;R-HSA-373727
R-HSA-389513	CTLA4 inhibitory signaling	1	25	0.00180258	0.385617	0.523507	2	5	0.000429443	9606	Homo sapiens	FYN		R-HSA-388833;R-HSA-388829
R-HSA-6807004	Negative regulation of MET activity	1	25	0.00180258	0.385617	0.523507	2	10	0.000858885	9606	Homo sapiens	SH3GL3		R-HSA-8875490;R-HSA-8875482
R-HSA-445144	Signal transduction by L1	1	25	0.00180258	0.385617	0.523507	1	11	0.000944774	9606	Homo sapiens	FLG		R-HSA-437230
R-HSA-168643	Nucleotide-binding domain, leucine rich repeat containing receptor (NLR) signaling pathways	2	69	0.00497512	0.388733	0.523507	12	45	0.00386498	9606	Homo sapiens	TNFAIP3;NOD2		R-HSA-741386;R-HSA-688136;R-HSA-688985;R-HSA-688137;R-HSA-706479;R-HSA-622415;R-HSA-168405;R-HSA-708349;R-HSA-741395;R-HSA-741411;R-HSA-168184;R-HSA-168412
R-HSA-1280215	Cytokine Signaling in Immune system	22	1051	0.0757805	0.393751	0.523507	50	624	0.0535944	9606	Homo sapiens	IL32;CSF1R;CDKN1A;CSF2;MMP3;IL18;NOD2;VEGFA;MT2A;IL36B;TNFSF9;HMOX1;FYN;RAPSN		R-HSA-912527;R-HSA-6789615;R-HSA-6797293;R-HSA-914182;R-HSA-6787820;R-HSA-8848395;R-HSA-8848392;R-HSA-9009554;R-HSA-913424;R-HSA-879917;R-HSA-449058;R-HSA-913451;R-HSA-209061;R-HSA-909738;R-HSA-450337;R-HSA-879909;R-HSA-1031716;R-HSA-879910;R-HSA-450346;R-HSA-879907;R-HSA-1031713;R-HSA-6797268;R-HSA-879934;R-HSA-879930;R-HSA-879925;R-HSA-448703;R-HSA-8848316;R-HSA-8848314;R-HSA-9009485;R-HSA-6784…
R-HSA-5658442	Regulation of RAS by GAPs	2	70	0.00504723	0.395561	0.523507	3	5	0.000429443	9606	Homo sapiens	RASAL2;RAPSN		R-HSA-5658231;R-HSA-5658435;R-HSA-5658430
R-HSA-373755	Semaphorin interactions	2	70	0.00504723	0.395561	0.523507	20	40	0.00343554	9606	Homo sapiens	FYN;RND1		R-HSA-399942;R-HSA-399941;R-HSA-400677;R-HSA-416546;R-HSA-399939;R-HSA-399951;R-HSA-416559;R-HSA-416588;R-HSA-399946;R-HSA-399947;R-HSA-399944;R-HSA-416562;R-HSA-416594;R-HSA-399952;R-HSA-399934;R-HSA-399935;R-HSA-399933;R-HSA-399930;R-HSA-399931;R-HSA-399928
R-HSA-1257604	PIP3 activates AKT signaling	7	309	0.0222799	0.39622	0.523507	5	85	0.00730052	9606	Homo sapiens	FLG;KITLG;CDKN1A;FYN;TRIB3;RAPSN		R-HSA-199443;R-HSA-2316434;R-HSA-198640;R-HSA-198613;R-HSA-8850992
R-HSA-450321	JNK (c-Jun kinases) phosphorylation and activation mediated by activated human TAK1	1	26	0.00187468	0.397483	0.523507	1	3	0.000257666	9606	Homo sapiens	NOD2		R-HSA-450337
R-HSA-8876384	Listeria monocytogenes entry into host cells	1	26	0.00187468	0.397483	0.523507	2	13	0.00111655	9606	Homo sapiens	SH3GL3		R-HSA-8876262;R-HSA-8876255
R-HSA-174403	Glutathione synthesis and recycling	1	26	0.00187468	0.397483	0.523507	1	9	0.000772997	9606	Homo sapiens	CHAC1		R-HSA-6785928
R-HSA-3858494	Beta-catenin independent WNT signaling	4	165	0.011897	0.400476	0.523507	8	51	0.00438031	9606	Homo sapiens	DAAM1;PDE6G;ITPR1;RAPSN		R-HSA-4608855;R-HSA-169680;R-HSA-3858489;R-HSA-3858495;R-HSA-3965450;R-HSA-4086392;R-HSA-4420052;R-HSA-4086393
R-HSA-425366	Transport of bile salts and organic acids, metal ions and amine compounds	4	165	0.011897	0.400476	0.523507	4	66	0.00566864	9606	Homo sapiens	SLC30A3;SLC6A15;SLC6A13;SLC30A1		R-HSA-435366;R-HSA-444007;R-HSA-437084;R-HSA-352059
R-HSA-2559586	DNA Damage/Telomere Stress Induced Senescence	2	71	0.00511933	0.402353	0.523507	6	18	0.00154599	9606	Homo sapiens	CDKN1A		R-HSA-4647613;R-HSA-69562;R-HSA-3786258;R-HSA-187934;R-HSA-4647594;R-HSA-4647593
R-HSA-418346	Platelet homeostasis	3	118	0.00850818	0.403557	0.523507	4	30	0.00257666	9606	Homo sapiens	NOS3;ITPR1;SLC8A2		R-HSA-418436;R-HSA-425661;R-HSA-139854;R-HSA-418442
R-HSA-8878159	Transcriptional regulation by RUNX3	3	118	0.00850818	0.403557	0.523507	4	47	0.00403676	9606	Homo sapiens	CDKN1A;RAPSN		R-HSA-8952408;R-HSA-8878130;R-HSA-8878178;R-HSA-8878186
R-HSA-1296041	Activation of G protein gated Potassium channels	1	27	0.00194679	0.409122	0.523507	1	1	8.58885e-05	9606	Homo sapiens	KCNJ2		R-HSA-1013020
R-HSA-997272	Inhibition of voltage gated Ca2+ channels via Gbeta/gamma subunits	1	27	0.00194679	0.409122	0.523507	1	1	8.58885e-05	9606	Homo sapiens	KCNJ2		R-HSA-1013020
R-HSA-1296059	G protein gated Potassium channels	1	27	0.00194679	0.409122	0.523507	1	1	8.58885e-05	9606	Homo sapiens	KCNJ2		R-HSA-1013020
R-HSA-450302	activated TAK1 mediates p38 MAPK activation	1	27	0.00194679	0.409122	0.523507	1	5	0.000429443	9606	Homo sapiens	NOD2		R-HSA-450346
R-HSA-209968	Thyroxine biosynthesis	1	27	0.00194679	0.409122	0.523507	1	11	0.000944774	9606	Homo sapiens	DIO2		R-HSA-209772
R-HSA-2672351	Stimuli-sensing channels	3	120	0.00865239	0.413908	0.523507	4	24	0.00206132	9606	Homo sapiens	CLCN7;ANO2;BEST1		R-HSA-2744361;R-HSA-2730959;R-HSA-2752067;R-HSA-2684901
R-HSA-5218859	Regulated Necrosis	1	28	0.00201889	0.420536	0.523507	3	13	0.00111655	9606	Homo sapiens	TNFRSF10B		R-HSA-3465429;R-HSA-5675456;R-HSA-5213462
R-HSA-5213460	RIPK1-mediated regulated necrosis	1	28	0.00201889	0.420536	0.523507	3	13	0.00111655	9606	Homo sapiens	TNFRSF10B		R-HSA-3465429;R-HSA-5675456;R-HSA-5213462
R-HSA-112409	RAF-independent MAPK1/3 activation	1	28	0.00201889	0.420536	0.523507	2	12	0.00103066	9606	Homo sapiens	DUSP10		R-HSA-5675376;R-HSA-5675373
R-HSA-8964038	LDL clearance	1	28	0.00201889	0.420536	0.523507	2	19	0.00163188	9606	Homo sapiens	NPC1		R-HSA-8876485;R-HSA-8876484
R-HSA-2173788	Downregulation of TGF-beta receptor signaling	1	28	0.00201889	0.420536	0.523507	2	28	0.00240488	9606	Homo sapiens	PPP1R15A		R-HSA-178178;R-HSA-178189
R-HSA-912526	Interleukin receptor SHC signaling	1	29	0.00209099	0.431731	0.523507	6	6	0.000515331	9606	Homo sapiens	CSF2		R-HSA-508247;R-HSA-453111;R-HSA-912527;R-HSA-913374;R-HSA-453104;R-HSA-913424
R-HSA-392451	G beta:gamma signalling through PI3Kgamma	1	29	0.00209099	0.431731	0.523507	2	4	0.000343554	9606	Homo sapiens	PIK3CG		R-HSA-392295;R-HSA-392300
R-HSA-5621575	CD209 (DC-SIGN) signaling	1	29	0.00209099	0.431731	0.523507	1	11	0.000944774	9606	Homo sapiens	FYN		R-HSA-5624486
R-HSA-3000170	Syndecan interactions	1	29	0.00209099	0.431731	0.523507	1	15	0.00128833	9606	Homo sapiens	GULP1		R-HSA-2731075
R-HSA-140837	Intrinsic Pathway of Fibrin Clot Formation	1	29	0.00209099	0.431731	0.523507	1	20	0.00171777	9606	Homo sapiens	F10		R-HSA-158164
R-HSA-164952	The role of Nef in HIV-1 replication and disease pathogenesis	1	29	0.00209099	0.431731	0.523507	1	20	0.00171777	9606	Homo sapiens	FYN		R-HSA-200908
R-HSA-3906995	Diseases associated with O-glycosylation of proteins	2	76	0.00547985	0.435754	0.523507	1	9	0.000772997	9606	Homo sapiens	THSD1;ADAMTS20		R-HSA-6785565
R-HSA-400685	Sema4D in semaphorin signaling	1	30	0.0021631	0.44271	0.523507	6	12	0.00103066	9606	Homo sapiens	RND1		R-HSA-400677;R-HSA-416562;R-HSA-416546;R-HSA-416594;R-HSA-416559;R-HSA-416588
R-HSA-5357956	TNFR1-induced NFkappaB signaling pathway	1	30	0.0021631	0.44271	0.523507	2	5	0.000429443	9606	Homo sapiens	TNFAIP3		R-HSA-5357776;R-HSA-5357860
R-HSA-420029	Tight junction interactions	1	30	0.0021631	0.44271	0.523507	1	3	0.000257666	9606	Homo sapiens	CLDN14		R-HSA-420019
R-HSA-5669034	TNFs bind their physiological receptors	1	30	0.0021631	0.44271	0.523507	1	13	0.00111655	9606	Homo sapiens	TNFSF9		R-HSA-8858475
R-HSA-416476	G alpha (q) signalling events	6	274	0.0197563	0.443046	0.523507	8	29	0.00249077	9606	Homo sapiens	MYO1A;MMP3;GNRH2;ITPR1;TAC1;RASGRP1		R-HSA-749448;R-HSA-2179413;R-HSA-749452;R-HSA-139941;R-HSA-392831;R-HSA-2179402;R-HSA-139854;R-HSA-379048
R-HSA-5601884	PIWI-interacting RNA (piRNA) biogenesis	1	31	0.0022352	0.453477	0.523507	7	15	0.00128833	9606	Homo sapiens	PIWIL2		R-HSA-5601910;R-HSA-5603062;R-HSA-5601922;R-HSA-5629218;R-HSA-5601929;R-HSA-5601883;R-HSA-5603067
R-HSA-3000157	Laminin interactions	1	31	0.0022352	0.453477	0.523507	7	15	0.00128833	9606	Homo sapiens	LAMC2		R-HSA-2426676;R-HSA-216048;R-HSA-3787997;R-HSA-2396083;R-HSA-4084505;R-HSA-3907292;R-HSA-349626
R-HSA-182971	EGFR downregulation	1	31	0.0022352	0.453477	0.523507	9	22	0.00188955	9606	Homo sapiens	SH3GL3		R-HSA-8867047;R-HSA-182994;R-HSA-183072;R-HSA-8867044;R-HSA-8867041;R-HSA-182986;R-HSA-183002;R-HSA-8951490;R-HSA-182990
R-HSA-2453864	Retinoid cycle disease events	1	31	0.0022352	0.453477	0.523507	1	16	0.00137422	9606	Homo sapiens	ABCA4		R-HSA-2466802
R-HSA-2474795	Diseases associated with visual transduction	1	31	0.0022352	0.453477	0.523507	1	17	0.0014601	9606	Homo sapiens	ABCA4		R-HSA-2466802
R-HSA-1474244	Extracellular matrix organization	7	329	0.023722	0.459221	0.523507	80	318	0.0273125	9606	Homo sapiens	COL17A1;CEACAM1;MMP3;COL20A1;LAMC2;GULP1		R-HSA-8948232;R-HSA-2002460;R-HSA-8948234;R-HSA-4086205;R-HSA-1474197;R-HSA-1564179;R-HSA-3791295;R-HSA-8948224;R-HSA-1604752;R-HSA-3791155;R-HSA-8948226;R-HSA-8948228;R-HSA-8948230;R-HSA-8948231;R-HSA-1564184;R-HSA-2426676;R-HSA-1566981;R-HSA-1566979;R-HSA-3791149;R-HSA-2002440;R-HSA-2327733;R-HSA-2396083;R-HSA-2327738;R-HSA-2466238;R-HSA-2168960;R-HSA-4084505;R-HSA-2022073;R-HSA-1454781;R-HSA-1…
R-HSA-4086398	Ca2+ pathway	2	80	0.00576826	0.461738	0.523507	4	27	0.00231899	9606	Homo sapiens	PDE6G;ITPR1		R-HSA-169680;R-HSA-4086392;R-HSA-4420052;R-HSA-4086393
R-HSA-9006115	Signaling by NTRK2 (TRKB)	1	32	0.0023073	0.464038	0.523507	7	38	0.00326376	9606	Homo sapiens	FYN		R-HSA-9032601;R-HSA-9032761;R-HSA-9032798;R-HSA-9037040;R-HSA-9032532;R-HSA-9032582;R-HSA-9032502
R-HSA-70635	Urea cycle	1	32	0.0023073	0.464038	0.523507	1	8	0.000687108	9606	Homo sapiens	ARG2		R-HSA-452036
R-HSA-5674400	Constitutive Signaling by AKT1 E17K in Cancer	1	32	0.0023073	0.464038	0.523507	1	18	0.00154599	9606	Homo sapiens	CDKN1A		R-HSA-2399969
R-HSA-3928663	EPHA-mediated growth cone collapse	1	33	0.00237941	0.474395	0.523507	3	4	0.000343554	9606	Homo sapiens	FYN		R-HSA-3928651;R-HSA-3928602;R-HSA-3928648
R-HSA-5602358	Diseases associated with the TLR signaling cascade	1	33	0.00237941	0.474395	0.523507	2	14	0.00120244	9606	Homo sapiens	TLR10		R-HSA-5602472;R-HSA-5602603
R-HSA-5260271	Diseases of Immune System	1	33	0.00237941	0.474395	0.523507	2	14	0.00120244	9606	Homo sapiens	TLR10		R-HSA-5602472;R-HSA-5602603
R-HSA-1483213	Synthesis of PE	1	33	0.00237941	0.474395	0.523507	1	9	0.000772997	9606	Homo sapiens	CHKA		R-HSA-1483222
R-HSA-8852276	The role of GTSE1 in G2/M progression after G2 checkpoint	2	82	0.00591247	0.474466	0.523507	2	10	0.000858885	9606	Homo sapiens	CDKN1A;RAPSN		R-HSA-8852354;R-HSA-8852362
R-HSA-2454202	Fc epsilon receptor (FCERI) signaling	5	234	0.0168722	0.479285	0.523507	10	63	0.00541098	9606	Homo sapiens	TXK;ITPR1;FYN;RASGRP1;RAPSN		R-HSA-2730888;R-HSA-169683;R-HSA-169680;R-HSA-2730858;R-HSA-2730860;R-HSA-2730847;R-HSA-2730833;R-HSA-5607724;R-HSA-2730885;R-HSA-2730871
R-HSA-5173105	O-linked glycosylation	3	133	0.00958973	0.479577	0.523507	4	26	0.0022331	9606	Homo sapiens	GCNT3;THSD1;ADAMTS20		R-HSA-914012;R-HSA-5173005;R-HSA-5173192;R-HSA-914018
R-HSA-397795	G-protein beta:gamma signalling	1	34	0.00245151	0.484553	0.523507	2	6	0.000515331	9606	Homo sapiens	PIK3CG		R-HSA-392295;R-HSA-392300
R-HSA-442742	CREB phosphorylation through the activation of Ras	1	34	0.00245151	0.484553	0.523507	2	8	0.000687108	9606	Homo sapiens	GRIN2C		R-HSA-442732;R-HSA-442760
R-HSA-140875	Common Pathway of Fibrin Clot Formation	1	34	0.00245151	0.484553	0.523507	5	29	0.00249077	9606	Homo sapiens	F10		R-HSA-140664;R-HSA-9015122;R-HSA-140686;R-HSA-9015111;R-HSA-140700
R-HSA-2424491	DAP12 signaling	1	35	0.00252361	0.494515	0.523507	10	17	0.0014601	9606	Homo sapiens	FYN		R-HSA-2395412;R-HSA-2424484;R-HSA-210289;R-HSA-2424486;R-HSA-2424487;R-HSA-2424480;R-HSA-2396594;R-HSA-2424482;R-HSA-2395439;R-HSA-2395801
R-HSA-1592389	Activation of Matrix Metalloproteinases	1	35	0.00252361	0.494515	0.523507	7	27	0.00231899	9606	Homo sapiens	MMP3		R-HSA-1592297;R-HSA-1592362;R-HSA-1604731;R-HSA-1604752;R-HSA-1604690;R-HSA-1592371;R-HSA-1592436
R-HSA-888590	GABA synthesis, release, reuptake and degradation	1	35	0.00252361	0.494515	0.523507	1	9	0.000772997	9606	Homo sapiens	SLC6A13		R-HSA-444007
R-HSA-6788656	Histidine, lysine, phenylalanine, tyrosine, proline and tryptophan catabolism	3	137	0.00987815	0.4991	0.523507	2	53	0.00455209	9606	Homo sapiens	SLC7A5;SLC3A2;CRYM		R-HSA-5693347;R-HSA-352232
R-HSA-5223345	Miscellaneous transport and binding events	1	36	0.00259572	0.504285	0.523507	1	13	0.00111655	9606	Homo sapiens	AZGP1		R-HSA-5252072
R-HSA-936440	Negative regulators of DDX58/IFIH1 signaling	1	36	0.00259572	0.504285	0.523507	1	13	0.00111655	9606	Homo sapiens	TNFAIP3		R-HSA-937337
R-HSA-2173789	TGF-beta receptor signaling activates SMADs	1	36	0.00259572	0.504285	0.523507	2	39	0.00334965	9606	Homo sapiens	PPP1R15A		R-HSA-178178;R-HSA-178189
R-HSA-69202	Cyclin E associated events during G1/S transition	2	88	0.00634509	0.511536	0.523507	7	20	0.00171777	9606	Homo sapiens	CDKN1A;RAPSN		R-HSA-187520;R-HSA-187552;R-HSA-187574;R-HSA-187575;R-HSA-198613;R-HSA-187828;R-HSA-69562
R-HSA-203615	eNOS activation	1	37	0.00266782	0.513867	0.523507	15	20	0.00171777	9606	Homo sapiens	NOS3		R-HSA-202144;R-HSA-203712;R-HSA-1497810;R-HSA-202127;R-HSA-203567;R-HSA-1497784;R-HSA-1497796;R-HSA-202129;R-HSA-202132;R-HSA-203700;R-HSA-203611;R-HSA-202137;R-HSA-202111;R-HSA-202110;R-HSA-203613
R-HSA-5694530	Cargo concentration in the ER	1	37	0.00266782	0.513867	0.523507	2	12	0.00103066	9606	Homo sapiens	FOLR3		R-HSA-5694522;R-HSA-5694410
R-HSA-1474151	Tetrahydrobiopterin (BH4) synthesis, recycling, salvage and regulation	1	37	0.00266782	0.513867	0.523507	2	15	0.00128833	9606	Homo sapiens	NOS3		R-HSA-1497796;R-HSA-1497784
R-HSA-9018677	Biosynthesis of DHA-derived SPMs	2	89	0.00641719	0.517546	0.523507	3	58	0.00498153	9606	Homo sapiens	CYP2C9		R-HSA-9027321;R-HSA-9027043;R-HSA-9027302
R-HSA-69656	Cyclin A:Cdk2-associated events at S phase entry	2	90	0.00648929	0.523507	0.523507	8	19	0.00163188	9606	Homo sapiens	CDKN1A;RAPSN		R-HSA-187520;R-HSA-187552;R-HSA-187574;R-HSA-187575;R-HSA-198613;R-HSA-187828;R-HSA-187934;R-HSA-187916
R-HSA-211945	Phase I - Functionalization of compounds	6	300	0.021631	0.529865	0.529865	19	99	0.00850296	9606	Homo sapiens	CYP2C9;AOC2;SMOX		R-HSA-5696183;R-HSA-76416;R-HSA-76354;R-HSA-5696146;R-HSA-76453;R-HSA-211910;R-HSA-212005;R-HSA-212004;R-HSA-76456;R-HSA-211881;R-HSA-76397;R-HSA-143468;R-HSA-76434;R-HSA-211991;R-HSA-211988;R-HSA-76475;R-HSA-211929;R-HSA-211966;R-HSA-141341
R-HSA-351202	Metabolism of polyamines	3	144	0.0103829	0.532349	0.532349	3	38	0.00326376	9606	Homo sapiens	ARG2;SMOX;RAPSN		R-HSA-353125;R-HSA-452036;R-HSA-141341
R-HSA-8878166	Transcriptional regulation by RUNX2	3	144	0.0103829	0.532349	0.532349	6	84	0.00721464	9606	Homo sapiens	CDKN1A;RAPSN		R-HSA-9008456;R-HSA-8939801;R-HSA-9008475;R-HSA-9008110;R-HSA-9008433;R-HSA-9009362
R-HSA-445989	TAK1 activates NFkB by phosphorylation and activation of IKKs complex	1	39	0.00281203	0.532482	0.532482	1	4	0.000343554	9606	Homo sapiens	NOD2		R-HSA-168184
R-HSA-5357905	Regulation of TNFR1 signaling	1	39	0.00281203	0.532482	0.532482	3	14	0.00120244	9606	Homo sapiens	TNFAIP3		R-HSA-5693108;R-HSA-5357845;R-HSA-5693055
R-HSA-190861	Gap junction assembly	1	39	0.00281203	0.532482	0.532482	1	16	0.00137422	9606	Homo sapiens	GJB4		R-HSA-190682
R-HSA-354192	Integrin alphaIIb beta3 signaling	1	39	0.00281203	0.532482	0.532482	1	24	0.00206132	9606	Homo sapiens	RASGRP1		R-HSA-354173
R-HSA-9006921	Integrin signaling	1	39	0.00281203	0.532482	0.532482	1	24	0.00206132	9606	Homo sapiens	RASGRP1		R-HSA-354173
R-HSA-1168372	Downstream signaling events of B Cell Receptor (BCR)	2	92	0.0066335	0.53528	0.53528	3	14	0.00120244	9606	Homo sapiens	RASGRP1;RAPSN		R-HSA-1168640;R-HSA-1168374;R-HSA-1168636
R-HSA-450531	Regulation of mRNA stability by proteins that bind AU-rich elements	2	93	0.0067056	0.541091	0.541091	7	26	0.0022331	9606	Homo sapiens	RAPSN;ZFP36L1		R-HSA-450406;R-HSA-450517;R-HSA-482788;R-HSA-450466;R-HSA-450474;R-HSA-450490;R-HSA-450488
R-HSA-390522	Striated Muscle Contraction	1	40	0.00288413	0.541521	0.541521	4	4	0.000343554	9606	Homo sapiens	MYBPC1		R-HSA-390597;R-HSA-390598;R-HSA-390593;R-HSA-390595
R-HSA-2022928	HS-GAG biosynthesis	1	40	0.00288413	0.541521	0.541521	1	14	0.00120244	9606	Homo sapiens	HS3ST2		R-HSA-2076611
R-HSA-168142	Toll Like Receptor 10 (TLR10) Cascade	2	94	0.00677771	0.546852	0.546852	15	58	0.00498153	9606	Homo sapiens	TLR10;NOD2		R-HSA-975852;R-HSA-975853;R-HSA-975880;R-HSA-450337;R-HSA-975878;R-HSA-975879;R-HSA-450346;R-HSA-975874;R-HSA-975873;R-HSA-168947;R-HSA-975866;R-HSA-975865;R-HSA-168184;R-HSA-975861;R-HSA-975857
R-HSA-975871	MyD88 cascade initiated on plasma membrane	2	94	0.00677771	0.546852	0.546852	14	57	0.00489565	9606	Homo sapiens	TLR10;NOD2		R-HSA-975852;R-HSA-975853;R-HSA-975880;R-HSA-450337;R-HSA-975878;R-HSA-975879;R-HSA-450346;R-HSA-975874;R-HSA-975873;R-HSA-975866;R-HSA-975865;R-HSA-168184;R-HSA-975861;R-HSA-975857
R-HSA-168176	Toll Like Receptor 5 (TLR5) Cascade	2	94	0.00677771	0.546852	0.546852	14	58	0.00498153	9606	Homo sapiens	TLR10;NOD2		R-HSA-975852;R-HSA-975853;R-HSA-975880;R-HSA-450337;R-HSA-975878;R-HSA-975879;R-HSA-450346;R-HSA-975874;R-HSA-975873;R-HSA-975866;R-HSA-975865;R-HSA-168184;R-HSA-975861;R-HSA-975857
R-HSA-203765	eNOS activation and regulation	1	41	0.00295623	0.550386	0.550386	21	26	0.0022331	9606	Homo sapiens	NOS3		R-HSA-203553;R-HSA-203680;R-HSA-202144;R-HSA-203712;R-HSA-1497810;R-HSA-203716;R-HSA-203625;R-HSA-202127;R-HSA-203567;R-HSA-203662;R-HSA-1497784;R-HSA-203565;R-HSA-1497796;R-HSA-202129;R-HSA-202132;R-HSA-203700;R-HSA-203611;R-HSA-202137;R-HSA-202111;R-HSA-202110;R-HSA-203613
R-HSA-202131	Metabolism of nitric oxide	1	41	0.00295623	0.550386	0.550386	21	26	0.0022331	9606	Homo sapiens	NOS3		R-HSA-203553;R-HSA-203680;R-HSA-202144;R-HSA-203712;R-HSA-1497810;R-HSA-203716;R-HSA-203625;R-HSA-202127;R-HSA-203567;R-HSA-203662;R-HSA-1497784;R-HSA-203565;R-HSA-1497796;R-HSA-202129;R-HSA-202132;R-HSA-203700;R-HSA-203611;R-HSA-202137;R-HSA-202111;R-HSA-202110;R-HSA-203613
R-HSA-202430	Translocation of ZAP-70 to Immunological synapse	1	42	0.00302834	0.55908	0.55908	1	4	0.000343554	9606	Homo sapiens	PTPN22		R-HSA-8855381
R-HSA-8964043	Plasma lipoprotein clearance	1	42	0.00302834	0.55908	0.55908	2	35	0.0030061	9606	Homo sapiens	NPC1		R-HSA-8876485;R-HSA-8876484
R-HSA-388841	Costimulation by the CD28 family	2	97	0.00699402	0.563832	0.563832	12	34	0.00292021	9606	Homo sapiens	FYN;TRIB3		R-HSA-389381;R-HSA-389348;R-HSA-389158;R-HSA-389350;R-HSA-198640;R-HSA-388833;R-HSA-388832;R-HSA-388829;R-HSA-388831;R-HSA-388814;R-HSA-389352;R-HSA-389354
R-HSA-5663202	Diseases of signal transduction	9	470	0.0338885	0.5665	0.5665	26	297	0.0255089	9606	Homo sapiens	FLG;KITLG;CDKN1A;ABCA4;FYN;RASAL2;RAPSN		R-HSA-2023455;R-HSA-2399969;R-HSA-2023451;R-HSA-5654544;R-HSA-5654545;R-HSA-5655326;R-HSA-5655263;R-HSA-8853325;R-HSA-8853322;R-HSA-5387392;R-HSA-2466802;R-HSA-5655240;R-HSA-1839100;R-HSA-1839098;R-HSA-1839094;R-HSA-5655290;R-HSA-1982066;R-HSA-2400009;R-HSA-1982065;R-HSA-5655269;R-HSA-5655266;R-HSA-6802834;R-HSA-5655278;R-HSA-2023462;R-HSA-2023460;R-HSA-2023456
R-HSA-8853659	RET signaling	1	43	0.00310044	0.567606	0.567606	19	24	0.00206132	9606	Homo sapiens	GDNF		R-HSA-8853734;R-HSA-8854981;R-HSA-8855747;R-HSA-8853762;R-HSA-8853793;R-HSA-8855617;R-HSA-8853792;R-HSA-8853774;R-HSA-8855564;R-HSA-8855915;R-HSA-8853737;R-HSA-8855508;R-HSA-8854899;R-HSA-8854897;R-HSA-8853789;R-HSA-8854908;R-HSA-8853755;R-HSA-8853753;R-HSA-8854905
R-HSA-983712	Ion channel transport	4	207	0.0149254	0.573842	0.573842	5	39	0.00334965	9606	Homo sapiens	CLCN7;ATP1A2;ANO2;BEST1		R-HSA-2744361;R-HSA-2730959;R-HSA-2752067;R-HSA-2684901;R-HSA-936897
R-HSA-4086400	PCP/CE pathway	2	99	0.00713822	0.574896	0.574896	4	24	0.00206132	9606	Homo sapiens	DAAM1;RAPSN		R-HSA-4608855;R-HSA-3858489;R-HSA-3858495;R-HSA-3965450
R-HSA-438064	Post NMDA receptor activation events	1	44	0.00317254	0.575969	0.575969	3	19	0.00163188	9606	Homo sapiens	GRIN2C		R-HSA-445367;R-HSA-442732;R-HSA-442760
R-HSA-1489509	DAG and IP3 signaling	1	44	0.00317254	0.575969	0.575969	2	19	0.00163188	9606	Homo sapiens	ITPR1		R-HSA-169683;R-HSA-169680
R-HSA-71064	Lysine catabolism	1	44	0.00317254	0.575969	0.575969	1	13	0.00111655	9606	Homo sapiens	CRYM		R-HSA-5693347
R-HSA-196757	Metabolism of folate and pterines	1	44	0.00317254	0.575969	0.575969	2	29	0.00249077	9606	Homo sapiens	MTHFD2		R-HSA-6801462;R-HSA-6801328
R-HSA-198933	Immunoregulatory interactions between a Lymphoid and a non-Lymphoid cell	6	316	0.0227846	0.580471	0.580471	6	43	0.00369321	9606	Homo sapiens	COL17A1;SIGLEC9;SLAMF7;MAFA;CD22;GULP1		R-HSA-5685607;R-HSA-5696356;R-HSA-5685605;R-HSA-5696357;R-HSA-199079;R-HSA-5686625
R-HSA-202427	Phosphorylation of CD3 and TCR zeta chains	1	45	0.00324465	0.58417	0.58417	2	7	0.00060122	9606	Homo sapiens	PTPN22		R-HSA-8855375;R-HSA-8852200
R-HSA-5675221	Negative regulation of MAPK pathway	1	45	0.00324465	0.58417	0.58417	2	12	0.00103066	9606	Homo sapiens	DUSP10		R-HSA-5675376;R-HSA-5675373
R-HSA-991365	Activation of GABAB receptors	1	45	0.00324465	0.58417	0.58417	1	6	0.000515331	9606	Homo sapiens	KCNJ2		R-HSA-1013020
R-HSA-977444	GABA B receptor activation	1	45	0.00324465	0.58417	0.58417	1	7	0.00060122	9606	Homo sapiens	KCNJ2		R-HSA-1013020
R-HSA-73887	Death Receptor Signalling	3	157	0.0113202	0.590661	0.590661	12	90	0.00772997	9606	Homo sapiens	TNFAIP3;TNFRSF10B		R-HSA-140978;R-HSA-5357776;R-HSA-141139;R-HSA-5693108;R-HSA-75187;R-HSA-5357845;R-HSA-5357860;R-HSA-141316;R-HSA-75238;R-HSA-5635741;R-HSA-5693055;R-HSA-75146
R-HSA-6798695	Neutrophil degranulation	9	480	0.0346096	0.5918	0.5918	10	10	0.000858885	9606	Homo sapiens	CEACAM1;SIGLEC9;SLC2A3;FOLR3;CD55;UNC13D;RAPSN;HRNR		R-HSA-6798743;R-HSA-6799350;R-HSA-6798739;R-HSA-6800434;R-HSA-6798751;R-HSA-6798749;R-HSA-6798748;R-HSA-6798747;R-HSA-6800426;R-HSA-6798745
R-HSA-451927	Interleukin-2 family signaling	1	47	0.00338885	0.600101	0.600101	6	58	0.00498153	9606	Homo sapiens	CSF2		R-HSA-508247;R-HSA-453111;R-HSA-912527;R-HSA-913374;R-HSA-453104;R-HSA-913424
R-HSA-379726	Mitochondrial tRNA aminoacylation	1	47	0.00338885	0.600101	0.600101	1	21	0.00180366	9606	Homo sapiens	GARS		R-HSA-380240
R-HSA-422356	Regulation of insulin secretion	2	104	0.00749874	0.601658	0.601658	4	37	0.00317788	9606	Homo sapiens	KCNJ11;ITPR1		R-HSA-169683;R-HSA-169680;R-HSA-265682;R-HSA-381644
R-HSA-5668541	TNFR2 non-canonical NF-kB pathway	2	104	0.00749874	0.601658	0.601658	4	43	0.00369321	9606	Homo sapiens	TNFSF9;RAPSN		R-HSA-5607731;R-HSA-5668481;R-HSA-8858475;R-HSA-5668520
R-HSA-69231	Cyclin D associated events in G1	1	48	0.00346096	0.607837	0.607837	8	14	0.00120244	9606	Homo sapiens	CDKN1A		R-HSA-8941915;R-HSA-8942607;R-HSA-9018017;R-HSA-69227;R-HSA-8942803;R-HSA-1226094;R-HSA-8942836;R-HSA-1226095
R-HSA-69236	G1 Phase	1	48	0.00346096	0.607837	0.607837	8	14	0.00120244	9606	Homo sapiens	CDKN1A		R-HSA-8941915;R-HSA-8942607;R-HSA-9018017;R-HSA-69227;R-HSA-8942803;R-HSA-1226094;R-HSA-8942836;R-HSA-1226095
R-HSA-3000480	Scavenging by Class A Receptors	1	48	0.00346096	0.607837	0.607837	1	10	0.000858885	9606	Homo sapiens	GULP1		R-HSA-3221843
R-HSA-6807878	COPI-mediated anterograde transport	2	106	0.00764294	0.612003	0.612003	6	12	0.00103066	9606	Homo sapiens	FOLR3;CD55		R-HSA-6807877;R-HSA-6807875;R-HSA-6809011;R-HSA-6809010;R-HSA-6809006;R-HSA-6809003
R-HSA-190236	Signaling by FGFR	2	106	0.00764294	0.612003	0.612003	33	142	0.0121962	9606	Homo sapiens	FLG		R-HSA-5654167;R-HSA-5654165;R-HSA-5654672;R-HSA-5654673;R-HSA-5654596;R-HSA-5654597;R-HSA-5654149;R-HSA-5654594;R-HSA-191062;R-HSA-5656064;R-HSA-5654592;R-HSA-190427;R-HSA-5654600;R-HSA-190429;R-HSA-5654582;R-HSA-5654578;R-HSA-5654514;R-HSA-190245;R-HSA-5654591;R-HSA-5654586;R-HSA-5654587;R-HSA-5654584;R-HSA-5654392;R-HSA-5654692;R-HSA-190256;R-HSA-5654690;R-HSA-5654560;R-HSA-5654575;R-HSA-565457…
R-HSA-381676	Glucagon-like Peptide-1 (GLP1) regulates insulin secretion	1	49	0.00353306	0.615424	0.615424	1	11	0.000944774	9606	Homo sapiens	ITPR1		R-HSA-381644
R-HSA-2142753	Arachidonic acid metabolism	3	164	0.0118249	0.620062	0.620062	3	77	0.00661342	9606	Homo sapiens	CYP2C9;ALOXE3		R-HSA-2161814;R-HSA-8942208;R-HSA-2161899
R-HSA-211733	Regulation of activated PAK-2p34 by proteasome mediated degradation	1	50	0.00360516	0.622865	0.622865	1	2	0.000171777	9606	Homo sapiens	RAPSN		R-HSA-211715
R-HSA-442755	Activation of NMDA receptor and postsynaptic events	1	50	0.00360516	0.622865	0.622865	6	23	0.00197544	9606	Homo sapiens	GRIN2C		R-HSA-445367;R-HSA-432164;R-HSA-432162;R-HSA-442732;R-HSA-432172;R-HSA-442760
R-HSA-75893	TNF signaling	1	50	0.00360516	0.622865	0.622865	6	29	0.00249077	9606	Homo sapiens	TNFAIP3		R-HSA-140978;R-HSA-5357776;R-HSA-5693108;R-HSA-5357845;R-HSA-5357860;R-HSA-5693055
R-HSA-190828	Gap junction trafficking	1	50	0.00360516	0.622865	0.622865	1	20	0.00171777	9606	Homo sapiens	GJB4		R-HSA-190682
R-HSA-8856825	Cargo recognition for clathrin-mediated endocytosis	2	109	0.00785925	0.627135	0.627135	5	14	0.00120244	9606	Homo sapiens	SH3GL3;STON2		R-HSA-8863463;R-HSA-8866279;R-HSA-8863727;R-HSA-8863723;R-HSA-8863721
R-HSA-9020702	Interleukin-1 signaling	2	109	0.00785925	0.627135	0.627135	2	45	0.00386498	9606	Homo sapiens	NOD2;RAPSN		R-HSA-209061;R-HSA-168184
R-HSA-3928662	EPHB-mediated forward signaling	1	51	0.00367727	0.630163	0.630163	5	26	0.0022331	9606	Homo sapiens	FYN		R-HSA-3928623;R-HSA-4093336;R-HSA-3928627;R-HSA-3928583;R-HSA-3928645
R-HSA-8955332	Carboxyterminal post-translational modifications of tubulin	1	51	0.00367727	0.630163	0.630163	1	6	0.000515331	9606	Homo sapiens	TTLL6		R-HSA-8865774
R-HSA-375280	Amine ligand-binding receptors	1	51	0.00367727	0.630163	0.630163	1	15	0.00128833	9606	Homo sapiens	CHRM4		R-HSA-390673
R-HSA-2173782	Binding and Uptake of Ligands by Scavenger Receptors	3	167	0.0120412	0.632217	0.632217	5	33	0.00283432	9606	Homo sapiens	CD163;SCARF1;GULP1		R-HSA-3221843;R-HSA-2168883;R-HSA-2247514;R-HSA-2230938;R-HSA-2197645
R-HSA-2172127	DAP12 interactions	1	52	0.00374937	0.637319	0.637319	10	33	0.00283432	9606	Homo sapiens	FYN		R-HSA-2395412;R-HSA-2424484;R-HSA-210289;R-HSA-2424486;R-HSA-2424487;R-HSA-2424480;R-HSA-2396594;R-HSA-2424482;R-HSA-2395439;R-HSA-2395801
R-HSA-350562	Regulation of ornithine decarboxylase (ODC)	1	52	0.00374937	0.637319	0.637319	1	4	0.000343554	9606	Homo sapiens	RAPSN		R-HSA-353125
R-HSA-140877	Formation of Fibrin Clot (Clotting Cascade)	1	52	0.00374937	0.637319	0.637319	10	57	0.00489565	9606	Homo sapiens	F10		R-HSA-140736;R-HSA-140769;R-HSA-158164;R-HSA-140664;R-HSA-140825;R-HSA-140777;R-HSA-9015122;R-HSA-140686;R-HSA-9015111;R-HSA-140700
R-HSA-180534	Vpu mediated degradation of CD4	1	53	0.00382147	0.644338	0.644338	1	5	0.000429443	9606	Homo sapiens	RAPSN		R-HSA-180573
R-HSA-177929	Signaling by EGFR	1	53	0.00382147	0.644338	0.644338	9	48	0.00412265	9606	Homo sapiens	SH3GL3		R-HSA-8867047;R-HSA-182994;R-HSA-183072;R-HSA-8867044;R-HSA-8867041;R-HSA-182986;R-HSA-183002;R-HSA-8951490;R-HSA-182990
R-HSA-1236978	Cross-presentation of soluble exogenous antigens (endosomes)	1	53	0.00382147	0.644338	0.644338	1	6	0.000515331	9606	Homo sapiens	RAPSN		R-HSA-1236970
R-HSA-76009	Platelet Aggregation (Plug Formation)	1	53	0.00382147	0.644338	0.644338	1	27	0.00231899	9606	Homo sapiens	RASGRP1		R-HSA-354173
R-HSA-75815	Ubiquitin-dependent degradation of Cyclin D	1	54	0.00389358	0.651221	0.651221	1	5	0.000429443	9606	Homo sapiens	RAPSN		R-HSA-75825
R-HSA-169911	Regulation of Apoptosis	1	54	0.00389358	0.651221	0.651221	1	5	0.000429443	9606	Homo sapiens	RAPSN		R-HSA-211715
R-HSA-69229	Ubiquitin-dependent degradation of Cyclin D1	1	54	0.00389358	0.651221	0.651221	1	5	0.000429443	9606	Homo sapiens	RAPSN		R-HSA-75825
R-HSA-349425	Autodegradation of the E3 ubiquitin ligase COP1	1	54	0.00389358	0.651221	0.651221	1	5	0.000429443	9606	Homo sapiens	RAPSN		R-HSA-264458
R-HSA-2514859	Inactivation, recovery and regulation of the phototransduction cascade	1	54	0.00389358	0.651221	0.651221	1	19	0.00163188	9606	Homo sapiens	PDE6G		R-HSA-2584246
R-HSA-189445	Metabolism of porphyrins	1	54	0.00389358	0.651221	0.651221	1	21	0.00180366	9606	Homo sapiens	HMOX1		R-HSA-189398
R-HSA-157858	Gap junction trafficking and regulation	1	54	0.00389358	0.651221	0.651221	1	24	0.00206132	9606	Homo sapiens	GJB4		R-HSA-190682
R-HSA-9006936	Signaling by TGF-beta family members	2	114	0.00821977	0.651333	0.651333	5	107	0.00919007	9606	Homo sapiens	PPP1R15A;ACVR1C		R-HSA-178178;R-HSA-1549526;R-HSA-2470483;R-HSA-2470508;R-HSA-178189
R-HSA-163125	Post-translational modification: synthesis of GPI-anchored proteins	2	115	0.00829187	0.65602	0.65602	1	16	0.00137422	9606	Homo sapiens	CEACAM1;PSCA		R-HSA-8940388
R-HSA-5620924	Intraflagellar transport	1	55	0.00396568	0.657972	0.657972	8	12	0.00103066	9606	Homo sapiens	KIF17		R-HSA-5624949;R-HSA-5624948;R-HSA-5624951;R-HSA-5625424;R-HSA-5625426;R-HSA-5625421;R-HSA-5625416;R-HSA-5624952
R-HSA-3928665	EPH-ephrin mediated repulsion of cells	1	55	0.00396568	0.657972	0.657972	5	9	0.000772997	9606	Homo sapiens	FYN		R-HSA-4093327;R-HSA-3928607;R-HSA-3928604;R-HSA-3928642;R-HSA-3928628
R-HSA-8854050	FBXL7 down-regulates AURKA during mitotic entry and in early mitosis	1	55	0.00396568	0.657972	0.657972	2	6	0.000515331	9606	Homo sapiens	RAPSN		R-HSA-8854071;R-HSA-8854044
R-HSA-174113	SCF-beta-TrCP mediated degradation of Emi1	1	55	0.00396568	0.657972	0.657972	1	3	0.000257666	9606	Homo sapiens	RAPSN		R-HSA-174203
R-HSA-69613	p53-Independent G1/S DNA damage checkpoint	1	55	0.00396568	0.657972	0.657972	1	5	0.000429443	9606	Homo sapiens	RAPSN		R-HSA-69600
R-HSA-69610	p53-Independent DNA Damage Response	1	55	0.00396568	0.657972	0.657972	1	5	0.000429443	9606	Homo sapiens	RAPSN		R-HSA-69600
R-HSA-69601	Ubiquitin Mediated Degradation of Phosphorylated Cdc25A	1	55	0.00396568	0.657972	0.657972	1	5	0.000429443	9606	Homo sapiens	RAPSN		R-HSA-69600
R-HSA-1483191	Synthesis of PC	1	55	0.00396568	0.657972	0.657972	1	18	0.00154599	9606	Homo sapiens	CHKA		R-HSA-1483004
R-HSA-76002	Platelet activation, signaling and aggregation	5	288	0.0207657	0.661423	0.661423	11	114	0.00979129	9606	Homo sapiens	ITPR1;FYN;RASGRP1;PIK3CG;VEGFA		R-HSA-139842;R-HSA-453200;R-HSA-139941;R-HSA-437118;R-HSA-481007;R-HSA-354173;R-HSA-114600;R-HSA-453183;R-HSA-392831;R-HSA-437162;R-HSA-139854
R-HSA-450408	AUF1 (hnRNP D0) binds and destabilizes mRNA	1	56	0.00403778	0.664592	0.664592	1	4	0.000343554	9606	Homo sapiens	RAPSN		R-HSA-450466
R-HSA-180585	Vif-mediated degradation of APOBEC3G	1	56	0.00403778	0.664592	0.664592	1	4	0.000343554	9606	Homo sapiens	RAPSN		R-HSA-180603
R-HSA-2453902	The canonical retinoid cycle in rods (twilight vision)	1	56	0.00403778	0.664592	0.664592	2	25	0.00214721	9606	Homo sapiens	ABCA4		R-HSA-2466749;R-HSA-1467466
R-HSA-209776	Amine-derived hormones	1	56	0.00403778	0.664592	0.664592	1	21	0.00180366	9606	Homo sapiens	DIO2		R-HSA-209772
R-HSA-4641258	Degradation of DVL	1	57	0.00410989	0.671085	0.671085	2	7	0.00060122	9606	Homo sapiens	RAPSN		R-HSA-1504193;R-HSA-4641260
R-HSA-4641257	Degradation of AXIN	1	57	0.00410989	0.671085	0.671085	2	8	0.000687108	9606	Homo sapiens	RAPSN		R-HSA-3640874;R-HSA-4641256
R-HSA-9604323	Negative regulation of NOTCH4 signaling	1	57	0.00410989	0.671085	0.671085	1	6	0.000515331	9606	Homo sapiens	RAPSN		R-HSA-9604642
R-HSA-8941858	Regulation of RUNX3 expression and activity	1	57	0.00410989	0.671085	0.671085	1	9	0.000772997	9606	Homo sapiens	RAPSN		R-HSA-8952408
R-HSA-2514856	The phototransduction cascade	1	58	0.00418199	0.677452	0.677452	3	27	0.00231899	9606	Homo sapiens	PDE6G		R-HSA-74065;R-HSA-2584246;R-HSA-74059
R-HSA-5607764	CLEC7A (Dectin-1) signaling	2	120	0.00865239	0.678707	0.678707	4	45	0.00386498	9606	Homo sapiens	ITPR1;RAPSN		R-HSA-169683;R-HSA-169680;R-HSA-5607731;R-HSA-5607724
R-HSA-68827	CDT1 association with the CDC6:ORC:origin complex	1	59	0.00425409	0.683697	0.683697	1	3	0.000257666	9606	Homo sapiens	RAPSN		R-HSA-68825
R-HSA-69541	Stabilization of p53	1	59	0.00425409	0.683697	0.683697	1	15	0.00128833	9606	Homo sapiens	RAPSN		R-HSA-264458
R-HSA-6794361	Neurexins and neuroligins	1	60	0.0043262	0.689821	0.689821	4	19	0.00163188	9606	Homo sapiens	GRIN2C		R-HSA-6794356;R-HSA-6794354;R-HSA-6794336;R-HSA-6794349
R-HSA-1474165	Reproduction	2	123	0.0088687	0.691726	0.691726	3	24	0.00206132	9606	Homo sapiens	CATSPERG;ZP1		R-HSA-2534359;R-HSA-2534388;R-HSA-1297338
R-HSA-5362768	Hh mutants that don't undergo autocatalytic processing are degraded by ERAD	1	61	0.0043983	0.695827	0.695827	1	6	0.000515331	9606	Homo sapiens	RAPSN		R-HSA-5387392
R-HSA-6802949	Signaling by RAS mutants	1	61	0.0043983	0.695827	0.695827	1	8	0.000687108	9606	Homo sapiens	RASAL2		R-HSA-6802834
R-HSA-5676590	NIK-->noncanonical NF-kB signaling	1	61	0.0043983	0.695827	0.695827	1	9	0.000772997	9606	Homo sapiens	RAPSN		R-HSA-5607731
R-HSA-422475	Axon guidance	10	582	0.0419641	0.699332	0.699332	93	297	0.0255089	9606	Homo sapiens	FLG;GDNF;UNC5B;ABL2;FYN;CACNA1H;RAPSN;GULP1;RND1		R-HSA-525833;R-HSA-3928633;R-HSA-3928639;R-HSA-8853762;R-HSA-3928627;R-HSA-8853774;R-HSA-3928625;R-HSA-8855564;R-HSA-3928631;R-HSA-3928628;R-HSA-3928623;R-HSA-8853789;R-HSA-3928615;R-HSA-622357;R-HSA-3928614;R-HSA-3928602;R-HSA-400677;R-HSA-418850;R-HSA-3928607;R-HSA-416546;R-HSA-4093336;R-HSA-8853793;R-HSA-3928604;R-HSA-8853792;R-HSA-374701;R-HSA-3928594;R-HSA-416559;R-HSA-418858;R-HSA-418856;R-…
R-HSA-5628897	TP53 Regulates Metabolic Genes	2	125	0.00901291	0.700163	0.700163	4	34	0.00292021	9606	Homo sapiens	SESN2		R-HSA-5629189;R-HSA-5631941;R-HSA-5629187;R-HSA-5631903
R-HSA-5610780	Degradation of GLI1 by the proteasome	1	62	0.0044704	0.701718	0.701718	2	6	0.000515331	9606	Homo sapiens	RAPSN		R-HSA-5610758;R-HSA-5610760
R-HSA-5610783	Degradation of GLI2 by the proteasome	1	62	0.0044704	0.701718	0.701718	1	5	0.000429443	9606	Homo sapiens	RAPSN		R-HSA-5610757
R-HSA-5610785	GLI3 is processed to GLI3R by the proteasome	1	62	0.0044704	0.701718	0.701718	1	5	0.000429443	9606	Homo sapiens	RAPSN		R-HSA-5610754
R-HSA-977443	GABA receptor activation	1	62	0.0044704	0.701718	0.701718	1	9	0.000772997	9606	Homo sapiens	KCNJ2		R-HSA-1013020
R-HSA-112043	PLC beta mediated events	1	62	0.0044704	0.701718	0.701718	2	23	0.00197544	9606	Homo sapiens	ITPR1		R-HSA-169683;R-HSA-169680
R-HSA-211897	Cytochrome P450 - arranged by substrate type	3	186	0.0134112	0.702877	0.702877	16	62	0.00532509	9606	Homo sapiens	CYP2C9		R-HSA-76416;R-HSA-76354;R-HSA-76453;R-HSA-211910;R-HSA-212005;R-HSA-212004;R-HSA-76456;R-HSA-211881;R-HSA-76397;R-HSA-143468;R-HSA-76434;R-HSA-211991;R-HSA-211988;R-HSA-76475;R-HSA-211929;R-HSA-211966
R-HSA-174084	Autodegradation of Cdh1 by Cdh1:APC/C	1	63	0.0045425	0.707494	0.707494	1	2	0.000171777	9606	Homo sapiens	RAPSN		R-HSA-174058
R-HSA-112040	G-protein mediated events	1	63	0.0045425	0.707494	0.707494	2	32	0.00274843	9606	Homo sapiens	ITPR1		R-HSA-169683;R-HSA-169680
R-HSA-8935690	Digestion	1	63	0.0045425	0.707494	0.707494	1	24	0.00206132	9606	Homo sapiens	PNLIPRP3		R-HSA-8979996
R-HSA-5387390	Hh mutants abrogate ligand secretion	1	64	0.00461461	0.713159	0.713159	1	7	0.00060122	9606	Homo sapiens	RAPSN		R-HSA-5387392
R-HSA-2871809	FCERI mediated Ca+2 mobilization	2	129	0.00930132	0.716463	0.716463	7	11	0.000944774	9606	Homo sapiens	TXK;ITPR1		R-HSA-2730888;R-HSA-169683;R-HSA-169680;R-HSA-2730858;R-HSA-2730847;R-HSA-2730833;R-HSA-2730885
R-HSA-5621480	Dectin-2 family	1	65	0.00468671	0.718715	0.718715	1	12	0.00103066	9606	Homo sapiens	FYN		R-HSA-5621355
R-HSA-3299685	Detoxification of Reactive Oxygen Species	1	65	0.00468671	0.718715	0.718715	1	34	0.00292021	9606	Homo sapiens	NCF1		R-HSA-1222376
R-HSA-4608870	Asymmetric localization of PCP proteins	1	66	0.00475881	0.724163	0.724163	1	7	0.00060122	9606	Homo sapiens	RAPSN		R-HSA-4608855
R-HSA-5607761	Dectin-1 mediated noncanonical NF-kB signaling	1	66	0.00475881	0.724163	0.724163	1	9	0.000772997	9606	Homo sapiens	RAPSN		R-HSA-5607731
R-HSA-8978934	Metabolism of cofactors	1	66	0.00475881	0.724163	0.724163	2	27	0.00231899	9606	Homo sapiens	NOS3		R-HSA-1497796;R-HSA-1497784
R-HSA-174154	APC/C:Cdc20 mediated degradation of Securin	1	67	0.00483092	0.729507	0.729507	1	3	0.000257666	9606	Homo sapiens	RAPSN		R-HSA-174202
R-HSA-5678895	Defective CFTR causes cystic fibrosis	1	67	0.00483092	0.729507	0.729507	1	7	0.00060122	9606	Homo sapiens	RAPSN		R-HSA-8866858
R-HSA-156590	Glutathione conjugation	1	67	0.00483092	0.729507	0.729507	1	14	0.00120244	9606	Homo sapiens	CHAC1		R-HSA-6785928
R-HSA-1227986	Signaling by ERBB2	1	67	0.00483092	0.729507	0.729507	1	43	0.00369321	9606	Homo sapiens	FYN		R-HSA-1963586
R-HSA-68867	Assembly of the pre-replicative complex	1	68	0.00490302	0.734747	0.734747	1	12	0.00103066	9606	Homo sapiens	RAPSN		R-HSA-68825
R-HSA-163841	Gamma carboxylation, hypusine formation and arylsulfatase activation	1	69	0.00497512	0.739886	0.739886	3	39	0.00334965	9606	Homo sapiens	F10		R-HSA-159733;R-HSA-159819;R-HSA-159757
R-HSA-450294	MAP kinase activation	1	69	0.00497512	0.739886	0.739886	2	32	0.00274843	9606	Homo sapiens	NOD2		R-HSA-450337;R-HSA-450346
R-HSA-1660499	Synthesis of PIPs at the plasma membrane	1	69	0.00497512	0.739886	0.739886	2	33	0.00283432	9606	Homo sapiens	PIK3CG		R-HSA-1676109;R-HSA-1676048
R-HSA-186797	Signaling by PDGF	1	69	0.00497512	0.739886	0.739886	1	28	0.00240488	9606	Homo sapiens	GULP1		R-HSA-382054
R-HSA-71291	Metabolism of amino acids and derivatives	11	660	0.0475881	0.741287	0.741287	10	283	0.0243065	9606	Homo sapiens	SLC7A5;ARG2;SMOX;PSAT1;DIO2;SARS;ASNS;PHGDH;SLC3A2;CRYM;RAPSN		R-HSA-353125;R-HSA-452036;R-HSA-5693347;R-HSA-70599;R-HSA-2408526;R-HSA-977348;R-HSA-977333;R-HSA-352232;R-HSA-141341;R-HSA-209772
R-HSA-1234176	Oxygen-dependent proline hydroxylation of Hypoxia-inducible Factor Alpha	1	70	0.00504723	0.744926	0.744926	1	12	0.00103066	9606	Homo sapiens	RAPSN		R-HSA-1234159
R-HSA-936837	Ion transport by P-type ATPases	1	71	0.00511933	0.749869	0.749869	1	14	0.00120244	9606	Homo sapiens	ATP1A2		R-HSA-936897
R-HSA-8963743	Digestion and absorption	1	71	0.00511933	0.749869	0.749869	1	30	0.00257666	9606	Homo sapiens	PNLIPRP3		R-HSA-8979996
R-HSA-5621481	C-type lectin receptors (CLRs)	3	202	0.0145649	0.753986	0.753986	6	68	0.00584042	9606	Homo sapiens	ITPR1;FYN;RAPSN		R-HSA-169683;R-HSA-169680;R-HSA-5624486;R-HSA-5607731;R-HSA-5607724;R-HSA-5621355
R-HSA-5690714	CD22 mediated BCR regulation	1	72	0.00519143	0.754716	0.754716	4	4	0.000343554	9606	Homo sapiens	CD22		R-HSA-5690740;R-HSA-5690702;R-HSA-5690701;R-HSA-5690669
R-HSA-174178	APC/C:Cdh1 mediated degradation of Cdc20 and other APC/C:Cdh1 targeted proteins in late mitosis/early G1	1	72	0.00519143	0.754716	0.754716	2	4	0.000343554	9606	Homo sapiens	RAPSN		R-HSA-174105;R-HSA-188191
R-HSA-174184	Cdc20:Phospho-APC/C mediated degradation of Cyclin A	1	72	0.00519143	0.754716	0.754716	1	3	0.000257666	9606	Homo sapiens	RAPSN		R-HSA-174255
R-HSA-1169091	Activation of NF-kappaB in B cells	1	72	0.00519143	0.754716	0.754716	1	10	0.000858885	9606	Homo sapiens	RAPSN		R-HSA-1168640
R-HSA-5358346	Hedgehog ligand biogenesis	1	72	0.00519143	0.754716	0.754716	1	15	0.00128833	9606	Homo sapiens	RAPSN		R-HSA-5362448
R-HSA-68949	Orc1 removal from chromatin	1	73	0.00526354	0.75947	0.75947	1	4	0.000343554	9606	Homo sapiens	RAPSN		R-HSA-68948
R-HSA-179419	APC:Cdc20 mediated degradation of cell cycle proteins prior to satisfation of the cell cycle checkpoint	1	73	0.00526354	0.75947	0.75947	1	6	0.000515331	9606	Homo sapiens	RAPSN		R-HSA-174255
R-HSA-69017	CDK-mediated phosphorylation and removal of Cdc6	1	74	0.00533564	0.764131	0.764131	1	4	0.000343554	9606	Homo sapiens	RAPSN		R-HSA-69016
R-HSA-913709	O-linked glycosylation of mucins	1	74	0.00533564	0.764131	0.764131	2	17	0.0014601	9606	Homo sapiens	GCNT3		R-HSA-914012;R-HSA-914018
R-HSA-8948751	Regulation of PTEN stability and activity	1	74	0.00533564	0.764131	0.764131	1	13	0.00111655	9606	Homo sapiens	RAPSN		R-HSA-8850992
R-HSA-163685	Integration of energy metabolism	2	143	0.0103108	0.767756	0.767756	4	65	0.00558275	9606	Homo sapiens	KCNJ11;ITPR1		R-HSA-169683;R-HSA-169680;R-HSA-265682;R-HSA-381644
R-HSA-176409	APC/C:Cdc20 mediated degradation of mitotic proteins	1	75	0.00540774	0.768703	0.768703	2	13	0.00111655	9606	Homo sapiens	RAPSN		R-HSA-174202;R-HSA-174255
R-HSA-204005	COPII-mediated vesicle transport	1	76	0.00547985	0.773187	0.773187	10	16	0.00137422	9606	Homo sapiens	FOLR3		R-HSA-5694439;R-HSA-5694418;R-HSA-203973;R-HSA-5694417;R-HSA-5694446;R-HSA-5694527;R-HSA-204008;R-HSA-5694522;R-HSA-5694441;R-HSA-5694409
R-HSA-176814	Activation of APC/C and APC/C:Cdc20 mediated degradation of mitotic proteins	1	76	0.00547985	0.773187	0.773187	2	15	0.00128833	9606	Homo sapiens	RAPSN		R-HSA-174202;R-HSA-174255
R-HSA-448424	Interleukin-17 signaling	1	77	0.00555195	0.777583	0.777583	2	35	0.0030061	9606	Homo sapiens	NOD2		R-HSA-450337;R-HSA-450346
R-HSA-202403	TCR signaling	2	146	0.0105271	0.777641	0.777641	4	52	0.0044662	9606	Homo sapiens	PTPN22;RAPSN		R-HSA-8855381;R-HSA-8855375;R-HSA-5607724;R-HSA-8852200
R-HSA-162909	Host Interactions of HIV factors	2	148	0.0106713	0.784026	0.784026	3	54	0.00463798	9606	Homo sapiens	FYN;RAPSN		R-HSA-180603;R-HSA-200908;R-HSA-180573
R-HSA-3000178	ECM proteoglycans	1	79	0.00569616	0.786124	0.786124	3	23	0.00197544	9606	Homo sapiens	GULP1		R-HSA-2396370;R-HSA-2327909;R-HSA-2466238
R-HSA-69206	G1/S Transition	2	150	0.0108155	0.79025	0.79025	7	61	0.0052392	9606	Homo sapiens	CDKN1A;RAPSN		R-HSA-187520;R-HSA-187552;R-HSA-187574;R-HSA-187575;R-HSA-198613;R-HSA-187828;R-HSA-69562
R-HSA-8939902	Regulation of RUNX2 expression and activity	1	80	0.00576826	0.790271	0.790271	4	32	0.00274843	9606	Homo sapiens	RAPSN		R-HSA-8939801;R-HSA-9008475;R-HSA-9008110;R-HSA-9009362
R-HSA-69620	Cell Cycle Checkpoints	4	279	0.0201168	0.793303	0.793303	9	57	0.00489565	9606	Homo sapiens	CDKN1A;RAPSN		R-HSA-69600;R-HSA-6803411;R-HSA-8852354;R-HSA-69562;R-HSA-6803388;R-HSA-187934;R-HSA-6803403;R-HSA-264458;R-HSA-6803801
R-HSA-176408	Regulation of APC/C activators between G1/S and early anaphase	1	82	0.00591247	0.798326	0.798326	1	14	0.00120244	9606	Homo sapiens	RAPSN		R-HSA-174203
R-HSA-917937	Iron uptake and transport	1	83	0.00598457	0.802237	0.802237	1	34	0.00292021	9606	Homo sapiens	HMOX1		R-HSA-189398
R-HSA-8856828	Clathrin-mediated endocytosis	2	155	0.011176	0.805124	0.805124	20	34	0.00292021	9606	Homo sapiens	SH3GL3;STON2		R-HSA-8868071;R-HSA-8863463;R-HSA-8866279;R-HSA-8868230;R-HSA-8863727;R-HSA-8867756;R-HSA-8868236;R-HSA-8863723;R-HSA-8868651;R-HSA-8867754;R-HSA-8863721;R-HSA-8868072;R-HSA-8868648;R-HSA-8868661;R-HSA-8868660;R-HSA-8868659;R-HSA-8868658;R-HSA-8869438;R-HSA-8871194;R-HSA-8871193
R-HSA-383280	Nuclear Receptor transcription pathway	1	84	0.00605667	0.806073	0.806073	1	1	8.58885e-05	9606	Homo sapiens	HNF4A		R-HSA-376419
R-HSA-170834	Signaling by TGF-beta Receptor Complex	1	85	0.00612878	0.809835	0.809835	2	82	0.00704286	9606	Homo sapiens	PPP1R15A		R-HSA-178178;R-HSA-178189
R-HSA-216083	Integrin cell surface interactions	1	86	0.00620088	0.813523	0.813523	1	54	0.00463798	9606	Homo sapiens	GULP1		R-HSA-2327695
R-HSA-9018678	Biosynthesis of specialized proresolving mediators (SPMs)	2	159	0.0114644	0.816343	0.816343	3	124	0.0106502	9606	Homo sapiens	CYP2C9		R-HSA-9027321;R-HSA-9027043;R-HSA-9027302
R-HSA-6802957	Oncogenic MAPK signaling	1	87	0.00627298	0.817141	0.817141	1	34	0.00292021	9606	Homo sapiens	RASAL2		R-HSA-6802834
R-HSA-168256	Immune System	46	2638	0.190208	0.817392	0.817392	151	1470	0.126256	9606	Homo sapiens	COL17A1;CSF1R;CDKN1A;CSF2;SIGLEC9;NCF1;TXK;ITPR1;TNFAIP3;SLC2A3;PTPN22;NOD2;RASGRP1;MT2A;IL36B;SLAMF7;HMOX1;FYN;CD55;IL32;NOS3;MMP3;IL18;MAFA;FBXO32;UNC13D;HRNR;VEGFA;GULP1;CEACAM1;TNFSF9;TRIB3;TLR10;ASB5;FOLR3;CD22;RAPSN		R-HSA-389381;R-HSA-741386;R-HSA-688136;R-HSA-688137;R-HSA-975880;R-HSA-975878;R-HSA-975879;R-HSA-2395439;R-HSA-914182;R-HSA-975874;R-HSA-975873;R-HSA-1168640;R-HSA-981535;R-HSA-5690702;R-HSA-741395;R-HSA-5690701;R-HSA-9009554;R-HSA-913424;R-HSA-879917;R-HSA-5690740;R-HSA-389158;R-HSA-449058;R-HSA-913451;R-HSA-450337;R-HSA-879909;R-HSA-741411;R-HSA-1031716;R-HSA-879910;R-HSA-450346;R-HSA-879907;R-…
R-HSA-68874	M/G1 Transition	1	88	0.00634509	0.820689	0.820689	1	21	0.00180366	9606	Homo sapiens	RAPSN		R-HSA-68825
R-HSA-69002	DNA Replication Pre-Initiation	1	88	0.00634509	0.820689	0.820689	1	21	0.00180366	9606	Homo sapiens	RAPSN		R-HSA-68825
R-HSA-1638091	Heparan sulfate/heparin (HS-GAG) metabolism	1	88	0.00634509	0.820689	0.820689	1	32	0.00274843	9606	Homo sapiens	HS3ST2		R-HSA-2076611
R-HSA-2559582	Senescence-Associated Secretory Phenotype (SASP)	1	89	0.00641719	0.824168	0.824168	2	22	0.00188955	9606	Homo sapiens	CDKN1A		R-HSA-3788705;R-HSA-3788708
R-HSA-8953897	Cellular responses to external stimuli	9	598	0.0431177	0.825953	0.825953	18	254	0.0218157	9606	Homo sapiens	CDKN1A;MT2A;NCF1;MT1G;MT1X;RAPSN;VEGFA		R-HSA-5662615;R-HSA-5662608;R-HSA-5662622;R-HSA-3786258;R-HSA-5662618;R-HSA-4647594;R-HSA-1235037;R-HSA-5662617;R-HSA-4647593;R-HSA-5662598;R-HSA-3788705;R-HSA-1222376;R-HSA-4647613;R-HSA-69562;R-HSA-187934;R-HSA-5662986;R-HSA-3788708;R-HSA-1234159
R-HSA-199977	ER to Golgi Anterograde Transport	2	163	0.0117528	0.826982	0.826982	17	39	0.00334965	9606	Homo sapiens	FOLR3;CD55		R-HSA-6807877;R-HSA-6807875;R-HSA-5694418;R-HSA-203973;R-HSA-5694417;R-HSA-6809006;R-HSA-5694527;R-HSA-204008;R-HSA-6809003;R-HSA-5694522;R-HSA-5694439;R-HSA-6809011;R-HSA-6809010;R-HSA-5694446;R-HSA-5694410;R-HSA-5694441;R-HSA-5694409
R-HSA-453276	Regulation of mitotic cell cycle	1	90	0.00648929	0.827579	0.827579	6	38	0.00326376	9606	Homo sapiens	RAPSN		R-HSA-174058;R-HSA-174202;R-HSA-174203;R-HSA-174105;R-HSA-188191;R-HSA-174255
R-HSA-174143	APC/C-mediated degradation of cell cycle proteins	1	90	0.00648929	0.827579	0.827579	6	38	0.00326376	9606	Homo sapiens	RAPSN		R-HSA-174058;R-HSA-174202;R-HSA-174203;R-HSA-174105;R-HSA-188191;R-HSA-174255
R-HSA-195253	Degradation of beta-catenin by the destruction complex	1	90	0.00648929	0.827579	0.827579	1	22	0.00188955	9606	Homo sapiens	RAPSN		R-HSA-2130282
R-HSA-69052	Switching of origins to a post-replicative state	1	92	0.0066335	0.834206	0.834206	2	9	0.000772997	9606	Homo sapiens	RAPSN		R-HSA-68948;R-HSA-69016
R-HSA-5632684	Hedgehog 'on' state	1	92	0.0066335	0.834206	0.834206	2	37	0.00317788	9606	Homo sapiens	RAPSN		R-HSA-5635868;R-HSA-5635854
R-HSA-9013694	Signaling by NOTCH4	1	92	0.0066335	0.834206	0.834206	1	20	0.00171777	9606	Homo sapiens	RAPSN		R-HSA-9604642
R-HSA-6794362	Protein-protein interactions at synapses	1	93	0.0067056	0.837424	0.837424	7	33	0.00283432	9606	Homo sapiens	GRIN2C		R-HSA-8849878;R-HSA-6794356;R-HSA-8849906;R-HSA-6794354;R-HSA-6794336;R-HSA-6794349;R-HSA-8849881
R-HSA-2187338	Visual phototransduction	2	168	0.0121133	0.839502	0.839502	5	90	0.00772997	9606	Homo sapiens	PDE6G;ABCA4		R-HSA-74065;R-HSA-2584246;R-HSA-2466749;R-HSA-74059;R-HSA-1467466
R-HSA-112314	Neurotransmitter receptors and postsynaptic signal transmission	2	171	0.0123297	0.846616	0.846616	7	56	0.00480976	9606	Homo sapiens	GRIN2C;KCNJ2		R-HSA-445367;R-HSA-432164;R-HSA-1013020;R-HSA-432162;R-HSA-442732;R-HSA-432172;R-HSA-442760
R-HSA-168928	DDX58/IFIH1-mediated induction of interferon-alpha/beta	1	96	0.00692191	0.846709	0.846709	1	46	0.00395087	9606	Homo sapiens	TNFAIP3		R-HSA-937337
R-HSA-8951664	Neddylation	3	241	0.0173769	0.849242	0.849242	10	31	0.00266254	9606	Homo sapiens	ASB5;FBXO32;RAPSN		R-HSA-8956040;R-HSA-8956200;R-HSA-8956184;R-HSA-8955289;R-HSA-8955241;R-HSA-8952618;R-HSA-8952620;R-HSA-8952044;R-HSA-8956140;R-HSA-8952039
R-HSA-453279	Mitotic G1-G1/S phases	2	173	0.0124739	0.851198	0.851198	15	98	0.00841707	9606	Homo sapiens	CDKN1A;RAPSN		R-HSA-187520;R-HSA-187552;R-HSA-8942607;R-HSA-9018017;R-HSA-69227;R-HSA-8941915;R-HSA-187574;R-HSA-187575;R-HSA-198613;R-HSA-187828;R-HSA-8942803;R-HSA-69562;R-HSA-1226094;R-HSA-8942836;R-HSA-1226095
R-HSA-5689603	UCH proteinases	1	98	0.00706612	0.852603	0.852603	2	11	0.000944774	9606	Homo sapiens	RAPSN		R-HSA-5665854;R-HSA-5665871
R-HSA-174824	Plasma lipoprotein assembly, remodeling, and clearance	1	98	0.00706612	0.852603	0.852603	2	84	0.00721464	9606	Homo sapiens	NPC1		R-HSA-8876485;R-HSA-8876484
R-HSA-5619115	Disorders of transmembrane transporters	3	243	0.0175211	0.853129	0.853129	3	88	0.00755819	9606	Homo sapiens	KCNJ11;ABCC9;RAPSN		R-HSA-5678418;R-HSA-8866858;R-HSA-5683113
R-HSA-373080	Class B/2 (Secretin family receptors)	1	99	0.00713822	0.855465	0.855465	1	20	0.00171777	9606	Homo sapiens	CD55		R-HSA-879674
R-HSA-112310	Neurotransmitter release cycle	1	99	0.00713822	0.855465	0.855465	1	36	0.00309199	9606	Homo sapiens	SLC6A13		R-HSA-444007
R-HSA-400253	Circadian Clock	1	99	0.00713822	0.855465	0.855465	1	59	0.00506742	9606	Homo sapiens	NFIL3		R-HSA-549493
R-HSA-2871837	FCERI mediated NF-kB activation	2	175	0.0126181	0.855656	0.855656	2	19	0.00163188	9606	Homo sapiens	RASGRP1;RAPSN		R-HSA-5607724;R-HSA-2730871
R-HSA-2682334	EPH-Ephrin signaling	1	101	0.00728243	0.861023	0.861023	24	56	0.00480976	9606	Homo sapiens	FYN		R-HSA-3928602;R-HSA-3928633;R-HSA-3928607;R-HSA-3928639;R-HSA-4093336;R-HSA-3928604;R-HSA-3928627;R-HSA-3928594;R-HSA-3928625;R-HSA-3928631;R-HSA-3928628;R-HSA-3928651;R-HSA-4093327;R-HSA-3928648;R-HSA-3928584;R-HSA-3928623;R-HSA-3928642;R-HSA-3928641;R-HSA-3928640;R-HSA-3928615;R-HSA-3928583;R-HSA-3928614;R-HSA-3928645;R-HSA-3928580
R-HSA-69242	S Phase	2	179	0.0129065	0.86421	0.86421	11	54	0.00463798	9606	Homo sapiens	CDKN1A;RAPSN		R-HSA-75825;R-HSA-187520;R-HSA-187552;R-HSA-187574;R-HSA-187575;R-HSA-68948;R-HSA-198613;R-HSA-187828;R-HSA-69016;R-HSA-187934;R-HSA-187916
R-HSA-2029481	FCGR activation	1	103	0.00742663	0.866369	0.866369	1	6	0.000515331	9606	Homo sapiens	FYN		R-HSA-2029459
R-HSA-975138	TRAF6 mediated induction of NFkB and MAP kinases upon TLR7/8 or 9 activation	1	103	0.00742663	0.866369	0.866369	3	47	0.00403676	9606	Homo sapiens	NOD2		R-HSA-450337;R-HSA-168184;R-HSA-450346
R-HSA-111885	Opioid Signalling	1	103	0.00742663	0.866369	0.866369	2	49	0.00420854	9606	Homo sapiens	ITPR1		R-HSA-169683;R-HSA-169680
R-HSA-975155	MyD88 dependent cascade initiated on endosome	1	104	0.00749874	0.868965	0.868965	3	62	0.00532509	9606	Homo sapiens	NOD2		R-HSA-450337;R-HSA-168184;R-HSA-450346
R-HSA-168181	Toll Like Receptor 7/8 (TLR7/8) Cascade	1	104	0.00749874	0.868965	0.868965	3	63	0.00541098	9606	Homo sapiens	NOD2		R-HSA-450337;R-HSA-168184;R-HSA-450346
R-HSA-196849	Metabolism of water-soluble vitamins and cofactors	3	252	0.01817	0.869558	0.869558	4	140	0.0120244	9606	Homo sapiens	MTHFD2;SLC2A3;SLC19A2		R-HSA-198818;R-HSA-6801462;R-HSA-6801328;R-HSA-199626
R-HSA-168898	Toll-Like Receptors Cascades	2	183	0.0131949	0.872297	0.872297	15	180	0.0154599	9606	Homo sapiens	TLR10;NOD2		R-HSA-975852;R-HSA-975853;R-HSA-975880;R-HSA-450337;R-HSA-975878;R-HSA-975879;R-HSA-450346;R-HSA-975874;R-HSA-975873;R-HSA-168947;R-HSA-975866;R-HSA-975865;R-HSA-168184;R-HSA-975861;R-HSA-975857
R-HSA-2168880	Scavenging of heme from plasma	1	106	0.00764294	0.874006	0.874006	2	12	0.00103066	9606	Homo sapiens	CD163		R-HSA-2168883;R-HSA-2230938
R-HSA-8939236	RUNX1 regulates transcription of genes involved in differentiation of HSCs	1	106	0.00764294	0.874006	0.874006	1	15	0.00128833	9606	Homo sapiens	RAPSN		R-HSA-8957265
R-HSA-5687128	MAPK6/MAPK4 signaling	1	106	0.00764294	0.874006	0.874006	1	40	0.00343554	9606	Homo sapiens	RAPSN		R-HSA-5687112
R-HSA-2730905	Role of LAT2/NTAL/LAB on calcium mobilization	1	107	0.00771505	0.876454	0.876454	1	7	0.00060122	9606	Homo sapiens	FYN		R-HSA-2730860
R-HSA-168164	Toll Like Receptor 3 (TLR3) Cascade	1	107	0.00771505	0.876454	0.876454	3	60	0.00515331	9606	Homo sapiens	NOD2		R-HSA-450337;R-HSA-168184;R-HSA-450346
R-HSA-1236975	Antigen processing-Cross presentation	2	186	0.0134112	0.878071	0.878071	3	23	0.00197544	9606	Homo sapiens	NCF1;RAPSN		R-HSA-1236967;R-HSA-1236935;R-HSA-1236970
R-HSA-381340	Transcriptional regulation of white adipocyte differentiation	1	108	0.00778715	0.878854	0.878854	1	18	0.00154599	9606	Homo sapiens	EGR2		R-HSA-381337
R-HSA-937061	TRIF(TICAM1)-mediated TLR4 signaling	1	108	0.00778715	0.878854	0.878854	3	57	0.00489565	9606	Homo sapiens	NOD2		R-HSA-450337;R-HSA-168184;R-HSA-450346
R-HSA-166166	MyD88-independent TLR4 cascade	1	108	0.00778715	0.878854	0.878854	3	59	0.00506742	9606	Homo sapiens	NOD2		R-HSA-450337;R-HSA-168184;R-HSA-450346
R-HSA-168138	Toll Like Receptor 9 (TLR9) Cascade	1	108	0.00778715	0.878854	0.878854	3	66	0.00566864	9606	Homo sapiens	NOD2		R-HSA-450337;R-HSA-168184;R-HSA-450346
R-HSA-70171	Glycolysis	1	108	0.00778715	0.878854	0.878854	1	24	0.00206132	9606	Homo sapiens	HKDC1		R-HSA-70420
R-HSA-1280218	Adaptive Immune System	15	999	0.0720311	0.881074	0.881074	43	253	0.0217298	9606	Homo sapiens	COL17A1;SIGLEC9;NCF1;ITPR1;PTPN22;MAFA;FBXO32;RASGRP1;GULP1;SLAMF7;FYN;TRIB3;ASB5;CD22;RAPSN		R-HSA-389381;R-HSA-8855375;R-HSA-388814;R-HSA-169683;R-HSA-1168640;R-HSA-983709;R-HSA-8855381;R-HSA-169680;R-HSA-983707;R-HSA-1236935;R-HSA-388829;R-HSA-5690702;R-HSA-388831;R-HSA-5690701;R-HSA-389348;R-HSA-983150;R-HSA-5690740;R-HSA-389158;R-HSA-389350;R-HSA-388833;R-HSA-983147;R-HSA-199079;R-HSA-388832;R-HSA-1168374;R-HSA-1168376;R-HSA-983140;R-HSA-389352;R-HSA-1168636;R-HSA-389354;R-HSA-885220…
R-HSA-8957275	Post-translational protein phosphorylation	1	109	0.00785925	0.881208	0.881208	1	1	8.58885e-05	9606	Homo sapiens	VGF		R-HSA-8952289
R-HSA-381070	IRE1alpha activates chaperones	1	110	0.00793136	0.883516	0.883516	5	54	0.00463798	9606	Homo sapiens	ERN1		R-HSA-381109;R-HSA-381217;R-HSA-425923;R-HSA-381091;R-HSA-381116
R-HSA-166058	MyD88:Mal cascade initiated on plasma membrane	1	110	0.00793136	0.883516	0.883516	3	63	0.00541098	9606	Homo sapiens	NOD2		R-HSA-450337;R-HSA-168184;R-HSA-450346
R-HSA-168188	Toll Like Receptor TLR6:TLR2 Cascade	1	110	0.00793136	0.883516	0.883516	3	65	0.00558275	9606	Homo sapiens	NOD2		R-HSA-450337;R-HSA-168184;R-HSA-450346
R-HSA-8878171	Transcriptional regulation by RUNX1	3	261	0.0188189	0.88435	0.88435	3	132	0.0113373	9606	Homo sapiens	CSF2;RAPSN		R-HSA-8938251;R-HSA-8957265;R-HSA-8938228
R-HSA-195721	Signaling by WNT	4	330	0.0237941	0.885776	0.885776	13	156	0.0133986	9606	Homo sapiens	DAAM1;PDE6G;ITPR1;RAPSN		R-HSA-3858489;R-HSA-3858495;R-HSA-4086392;R-HSA-4086393;R-HSA-4641260;R-HSA-2130282;R-HSA-4641256;R-HSA-4608855;R-HSA-169680;R-HSA-3965450;R-HSA-4420052;R-HSA-1504193;R-HSA-3640874
R-HSA-1483255	PI Metabolism	1	112	0.00807556	0.888	0.888	2	89	0.00764408	9606	Homo sapiens	PIK3CG		R-HSA-1676109;R-HSA-1676048
R-HSA-168179	Toll Like Receptor TLR1:TLR2 Cascade	1	113	0.00814767	0.890177	0.890177	3	65	0.00558275	9606	Homo sapiens	NOD2		R-HSA-450337;R-HSA-168184;R-HSA-450346
R-HSA-181438	Toll Like Receptor 2 (TLR2) Cascade	1	113	0.00814767	0.890177	0.890177	3	67	0.00575453	9606	Homo sapiens	NOD2		R-HSA-450337;R-HSA-168184;R-HSA-450346
R-HSA-2029480	Fcgamma receptor (FCGR) dependent phagocytosis	2	193	0.0139159	0.89062	0.89062	3	42	0.00360732	9606	Homo sapiens	ITPR1;FYN		R-HSA-169683;R-HSA-169680;R-HSA-2029459
R-HSA-375276	Peptide ligand-binding receptors	2	194	0.013988	0.892312	0.892312	3	73	0.00626986	9606	Homo sapiens	MYO1A;TAC1		R-HSA-383363;R-HSA-383373;R-HSA-380076
R-HSA-3781865	Diseases of glycosylation	2	194	0.013988	0.892312	0.892312	1	77	0.00661342	9606	Homo sapiens	THSD1;ADAMTS20		R-HSA-6785565
R-HSA-373076	Class A/1 (Rhodopsin-like receptors)	5	402	0.0289855	0.89345	0.89345	6	143	0.0122821	9606	Homo sapiens	MYO1A;GPR35;CHRM4;GNRH2;TAC1		R-HSA-6805205;R-HSA-390673;R-HSA-383363;R-HSA-383373;R-HSA-380076;R-HSA-391372
R-HSA-211000	Gene Silencing by RNA	1	115	0.00829187	0.894405	0.894405	7	36	0.00309199	9606	Homo sapiens	PIWIL2		R-HSA-5601910;R-HSA-5603062;R-HSA-5601922;R-HSA-5629218;R-HSA-5601929;R-HSA-5601883;R-HSA-5603067
R-HSA-166520	Signaling by NTRKs	1	115	0.00829187	0.894405	0.894405	7	117	0.010049	9606	Homo sapiens	FYN		R-HSA-9032601;R-HSA-9032761;R-HSA-9032798;R-HSA-9037040;R-HSA-9032532;R-HSA-9032582;R-HSA-9032502
R-HSA-5619507	Activation of HOX genes during differentiation	1	116	0.00836398	0.896457	0.896457	7	43	0.00369321	9606	Homo sapiens	EGR2		R-HSA-5617492;R-HSA-5617661;R-HSA-5617484;R-HSA-5617486;R-HSA-5617454;R-HSA-5617672;R-HSA-5617483
R-HSA-5617472	Activation of anterior HOX genes in hindbrain development during early embryogenesis	1	116	0.00836398	0.896457	0.896457	7	43	0.00369321	9606	Homo sapiens	EGR2		R-HSA-5617492;R-HSA-5617661;R-HSA-5617484;R-HSA-5617486;R-HSA-5617454;R-HSA-5617672;R-HSA-5617483
R-HSA-2408557	Selenocysteine synthesis	1	116	0.00836398	0.896457	0.896457	1	7	0.00060122	9606	Homo sapiens	SARS		R-HSA-2408526
R-HSA-2559583	Cellular Senescence	2	198	0.0142764	0.89884	0.89884	8	89	0.00764408	9606	Homo sapiens	CDKN1A		R-HSA-3788705;R-HSA-4647613;R-HSA-69562;R-HSA-3786258;R-HSA-187934;R-HSA-4647594;R-HSA-3788708;R-HSA-4647593
R-HSA-5610787	Hedgehog 'off' state	1	123	0.0088687	0.909755	0.909755	4	32	0.00274843	9606	Homo sapiens	RAPSN		R-HSA-5610757;R-HSA-5610758;R-HSA-5610754;R-HSA-5610760
R-HSA-211859	Biological oxidations	7	547	0.0394405	0.910198	0.910198	20	186	0.0159753	9606	Homo sapiens	CYP2C9;AOC2;SMOX;CHAC1		R-HSA-5696183;R-HSA-76416;R-HSA-76354;R-HSA-5696146;R-HSA-76453;R-HSA-211910;R-HSA-212005;R-HSA-212004;R-HSA-76456;R-HSA-211881;R-HSA-76397;R-HSA-143468;R-HSA-6785928;R-HSA-76434;R-HSA-211991;R-HSA-211988;R-HSA-76475;R-HSA-211929;R-HSA-211966;R-HSA-141341
R-HSA-202424	Downstream TCR signaling	1	124	0.0089408	0.911511	0.911511	1	24	0.00206132	9606	Homo sapiens	RAPSN		R-HSA-5607724
R-HSA-381426	Regulation of Insulin-like Growth Factor (IGF) transport and uptake by Insulin-like Growth Factor Binding Proteins (IGFBPs)	1	127	0.00915711	0.916575	0.916575	1	14	0.00120244	9606	Homo sapiens	VGF		R-HSA-8952289
R-HSA-69275	G2/M Transition	2	211	0.0152138	0.917602	0.917602	4	78	0.0066993	9606	Homo sapiens	CDKN1A;RAPSN		R-HSA-8854071;R-HSA-8852354;R-HSA-8854044;R-HSA-8852362
R-HSA-2029485	Role of phospholipids in phagocytosis	1	129	0.00930132	0.91979	0.91979	2	12	0.00103066	9606	Homo sapiens	ITPR1		R-HSA-169683;R-HSA-169680
R-HSA-373760	L1CAM interactions	1	129	0.00930132	0.91979	0.91979	1	54	0.00463798	9606	Homo sapiens	FLG		R-HSA-437230
R-HSA-5688426	Deubiquitination	3	288	0.0207657	0.920168	0.920168	9	77	0.00661342	9606	Homo sapiens	TNFAIP3;NOD2;RAPSN		R-HSA-5690870;R-HSA-688136;R-HSA-8869506;R-HSA-5689539;R-HSA-5665854;R-HSA-5665871;R-HSA-5690845;R-HSA-5690827;R-HSA-5690856
R-HSA-112315	Transmission across Chemical Synapses	3	288	0.0207657	0.920168	0.920168	8	108	0.00927596	9606	Homo sapiens	SLC6A13;GRIN2C;KCNJ2		R-HSA-444007;R-HSA-445367;R-HSA-432164;R-HSA-1013020;R-HSA-432162;R-HSA-442732;R-HSA-432172;R-HSA-442760
R-HSA-453274	Mitotic G2-G2/M phases	2	213	0.015358	0.920181	0.920181	4	80	0.00687108	9606	Homo sapiens	CDKN1A;RAPSN		R-HSA-8854071;R-HSA-8852354;R-HSA-8854044;R-HSA-8852362
R-HSA-69239	Synthesis of DNA	1	132	0.00951763	0.924382	0.924382	2	26	0.0022331	9606	Homo sapiens	RAPSN		R-HSA-68948;R-HSA-69016
R-HSA-948021	Transport to the Golgi and subsequent modification	2	218	0.0157185	0.926302	0.926302	17	60	0.00515331	9606	Homo sapiens	FOLR3;CD55		R-HSA-6807877;R-HSA-6807875;R-HSA-5694418;R-HSA-203973;R-HSA-5694417;R-HSA-6809006;R-HSA-5694527;R-HSA-204008;R-HSA-6809003;R-HSA-5694522;R-HSA-5694439;R-HSA-6809011;R-HSA-6809010;R-HSA-5694446;R-HSA-5694410;R-HSA-5694441;R-HSA-5694409
R-HSA-112316	Neuronal System	5	435	0.0313649	0.927394	0.927394	18	161	0.0138281	9606	Homo sapiens	KCNJ11;SLC6A13;ABCC9;GRIN2C;KCNJ2		R-HSA-444007;R-HSA-432164;R-HSA-432162;R-HSA-6794336;R-HSA-442732;R-HSA-432172;R-HSA-6794349;R-HSA-1296024;R-HSA-1369017;R-HSA-442760;R-HSA-8849878;R-HSA-445367;R-HSA-1013020;R-HSA-6794356;R-HSA-8849906;R-HSA-6794354;R-HSA-1296046;R-HSA-8849881
R-HSA-1483206	Glycerophospholipid biosynthesis	2	222	0.0160069	0.930878	0.930878	3	133	0.0114232	9606	Homo sapiens	CHKA;CPNE7		R-HSA-1483222;R-HSA-1483004;R-HSA-5333678
R-HSA-114608	Platelet degranulation	1	137	0.00987815	0.931462	0.931462	1	11	0.000944774	9606	Homo sapiens	VEGFA		R-HSA-481007
R-HSA-977606	Regulation of Complement cascade	1	139	0.0100224	0.934105	0.934105	2	42	0.00360732	9606	Homo sapiens	CD55		R-HSA-981535;R-HSA-977619
R-HSA-70326	Glucose metabolism	1	139	0.0100224	0.934105	0.934105	1	50	0.00429443	9606	Homo sapiens	HKDC1		R-HSA-70420
R-HSA-2262752	Cellular responses to stress	6	511	0.0368448	0.934473	0.934473	11	184	0.0158035	9606	Homo sapiens	CDKN1A;NCF1;RAPSN;VEGFA		R-HSA-3788705;R-HSA-1222376;R-HSA-4647613;R-HSA-69562;R-HSA-3786258;R-HSA-187934;R-HSA-4647594;R-HSA-3788708;R-HSA-1234159;R-HSA-1235037;R-HSA-4647593
R-HSA-212436	Generic Transcription Pathway	20	1376	0.0992141	0.936076	0.936076	39	649	0.0557416	9606	Homo sapiens	CDKN1A;CSF2;GADD45A;HNF4A;SESN2;PMAIP1;TNFRSF10B;RAPSN;BBC3;VEGFA		R-HSA-9008456;R-HSA-3215152;R-HSA-4331331;R-HSA-8938251;R-HSA-8865280;R-HSA-5631903;R-HSA-139913;R-HSA-4331340;R-HSA-5629189;R-HSA-5631941;R-HSA-8952408;R-HSA-8939801;R-HSA-9008475;R-HSA-5633414;R-HSA-5629187;R-HSA-3215144;R-HSA-8957265;R-HSA-9009362;R-HSA-6803388;R-HSA-8865244;R-HSA-187934;R-HSA-6791109;R-HSA-6791235;R-HSA-8878178;R-HSA-376419;R-HSA-8864737;R-HSA-9008110;R-HSA-6803403;R-HSA-8878…
R-HSA-69306	DNA Replication	1	141	0.0101666	0.936646	0.936646	3	47	0.00403676	9606	Homo sapiens	RAPSN		R-HSA-68948;R-HSA-68825;R-HSA-69016
R-HSA-196854	Metabolism of vitamins and cofactors	4	381	0.0274713	0.940037	0.940037	6	201	0.0172636	9606	Homo sapiens	MTHFD2;NOS3;SLC2A3;SLC19A2		R-HSA-198818;R-HSA-6801462;R-HSA-1497796;R-HSA-6801328;R-HSA-199626;R-HSA-1497784
R-HSA-76005	Response to elevated platelet cytosolic Ca2+	1	144	0.0103829	0.940276	0.940276	1	14	0.00120244	9606	Homo sapiens	VEGFA		R-HSA-481007
R-HSA-166016	Toll Like Receptor 4 (TLR4) Cascade	1	144	0.0103829	0.940276	0.940276	3	94	0.00807352	9606	Homo sapiens	NOD2		R-HSA-450337;R-HSA-168184;R-HSA-450346
R-HSA-376176	Signaling by ROBO receptors	2	235	0.0169443	0.943968	0.943968	5	60	0.00515331	9606	Homo sapiens	ABL2;RAPSN		R-HSA-428885;R-HSA-428883;R-HSA-376141;R-HSA-9011313;R-HSA-428888
R-HSA-5663220	RHO GTPases Activate Formins	1	148	0.0106713	0.944797	0.944797	2	27	0.00231899	9606	Homo sapiens	DAAM1		R-HSA-3858489;R-HSA-3858495
R-HSA-983168	Antigen processing: Ubiquitination & Proteasome degradation	3	315	0.0227125	0.945599	0.945599	5	9	0.000772997	9606	Homo sapiens	ASB5;FBXO32;RAPSN		R-HSA-983150;R-HSA-983147;R-HSA-983157;R-HSA-983156;R-HSA-983140
R-HSA-1483257	Phospholipid metabolism	3	315	0.0227125	0.945599	0.945599	5	218	0.0187237	9606	Homo sapiens	CHKA;CPNE7;PIK3CG		R-HSA-1483222;R-HSA-1676109;R-HSA-1676048;R-HSA-1483004;R-HSA-5333678
R-HSA-69481	G2/M Checkpoints	1	154	0.0111039	0.950945	0.950945	1	24	0.00206132	9606	Homo sapiens	RAPSN		R-HSA-8852354
R-HSA-166658	Complement cascade	1	156	0.0112481	0.952839	0.952839	2	71	0.00609808	9606	Homo sapiens	CD55		R-HSA-981535;R-HSA-977619
R-HSA-168249	Innate Immune System	18	1302	0.0938784	0.954948	0.954948	65	651	0.0559134	9606	Homo sapiens	SIGLEC9;NCF1;NOS3;TXK;ITPR1;TNFAIP3;SLC2A3;NOD2;RASGRP1;UNC13D;HRNR;CEACAM1;FYN;TLR10;FOLR3;CD55;RAPSN		R-HSA-2424484;R-HSA-741386;R-HSA-2424486;R-HSA-688136;R-HSA-418436;R-HSA-2424487;R-HSA-688137;R-HSA-2424480;R-HSA-2424482;R-HSA-975880;R-HSA-975878;R-HSA-975879;R-HSA-2395439;R-HSA-975874;R-HSA-2029459;R-HSA-975873;R-HSA-6799350;R-HSA-981535;R-HSA-2396594;R-HSA-741395;R-HSA-2730888;R-HSA-706479;R-HSA-450337;R-HSA-741411;R-HSA-2730885;R-HSA-450346;R-HSA-2395412;R-HSA-2395801;R-HSA-5621355;R-HSA-27…
R-HSA-877300	Interferon gamma signaling	2	250	0.0180258	0.956147	0.956147	2	15	0.00128833	9606	Homo sapiens	MT2A		R-HSA-1031716;R-HSA-1031713
R-HSA-1236974	ER-Phagosome pathway	1	164	0.0118249	0.959714	0.959714	1	10	0.000858885	9606	Homo sapiens	RAPSN		R-HSA-1236935
R-HSA-5358351	Signaling by Hedgehog	1	167	0.0120412	0.962027	0.962027	7	82	0.00704286	9606	Homo sapiens	RAPSN		R-HSA-5610757;R-HSA-5362448;R-HSA-5610758;R-HSA-5610754;R-HSA-5635868;R-HSA-5635854;R-HSA-5610760
R-HSA-72766	Translation	3	340	0.0245151	0.962244	0.962244	4	99	0.00850296	9606	Homo sapiens	WARS;SARS;GARS		R-HSA-380048;R-HSA-380240;R-HSA-379977;R-HSA-379992
R-HSA-162906	HIV Infection	2	260	0.0187468	0.962816	0.962816	3	156	0.0133986	9606	Homo sapiens	FYN;RAPSN		R-HSA-180603;R-HSA-200908;R-HSA-180573
R-HSA-6807070	PTEN Regulation	1	171	0.0123297	0.964905	0.964905	1	56	0.00480976	9606	Homo sapiens	RAPSN		R-HSA-8850992
R-HSA-1630316	Glycosaminoglycan metabolism	1	182	0.0131228	0.971748	0.971748	1	82	0.00704286	9606	Homo sapiens	HS3ST2		R-HSA-2076611
R-HSA-9010553	Regulation of expression of SLITs and ROBOs	1	183	0.0131949	0.9723	0.9723	1	20	0.00171777	9606	Homo sapiens	RAPSN		R-HSA-9011313
R-HSA-2408522	Selenoamino acid metabolism	1	184	0.013267	0.972841	0.972841	1	33	0.00283432	9606	Homo sapiens	SARS		R-HSA-2408526
R-HSA-500792	GPCR ligand binding	6	593	0.0427572	0.975312	0.975312	7	170	0.014601	9606	Homo sapiens	MYO1A;GPR35;CHRM4;GNRH2;TAC1;CD55		R-HSA-6805205;R-HSA-390673;R-HSA-383363;R-HSA-879674;R-HSA-383373;R-HSA-380076;R-HSA-391372
R-HSA-2467813	Separation of Sister Chromatids	1	193	0.0139159	0.977261	0.977261	1	8	0.000687108	9606	Homo sapiens	RAPSN		R-HSA-174202
R-HSA-983231	Factors involved in megakaryocyte development and platelet production	1	193	0.0139159	0.977261	0.977261	3	43	0.00369321	9606	Homo sapiens	MAFF		R-HSA-1008220;R-HSA-1008200;R-HSA-1008240
R-HSA-73857	RNA Polymerase II Transcription	20	1515	0.109236	0.979139	0.979139	39	708	0.0608091	9606	Homo sapiens	CDKN1A;CSF2;GADD45A;HNF4A;SESN2;PMAIP1;TNFRSF10B;RAPSN;BBC3;VEGFA		R-HSA-9008456;R-HSA-3215152;R-HSA-4331331;R-HSA-8938251;R-HSA-8865280;R-HSA-5631903;R-HSA-139913;R-HSA-4331340;R-HSA-5629189;R-HSA-5631941;R-HSA-8952408;R-HSA-8939801;R-HSA-9008475;R-HSA-5633414;R-HSA-5629187;R-HSA-3215144;R-HSA-8957265;R-HSA-9009362;R-HSA-6803388;R-HSA-8865244;R-HSA-187934;R-HSA-6791109;R-HSA-6791235;R-HSA-8878178;R-HSA-376419;R-HSA-8864737;R-HSA-9008110;R-HSA-6803403;R-HSA-8878…
R-HSA-983169	Class I MHC mediated antigen processing & presentation	4	464	0.0334559	0.980728	0.980728	8	48	0.00412265	9606	Homo sapiens	NCF1;ASB5;FBXO32;RAPSN		R-HSA-983150;R-HSA-983147;R-HSA-1236967;R-HSA-1236935;R-HSA-1236970;R-HSA-983157;R-HSA-983156;R-HSA-983140
R-HSA-5689880	Ub-specific processing proteases	1	206	0.0148533	0.982411	0.982411	1	40	0.00343554	9606	Homo sapiens	RAPSN		R-HSA-5689539
R-HSA-5617833	Cilium Assembly	1	207	0.0149254	0.982755	0.982755	8	50	0.00429443	9606	Homo sapiens	KIF17		R-HSA-5624949;R-HSA-5624948;R-HSA-5624951;R-HSA-5625424;R-HSA-5625426;R-HSA-5625421;R-HSA-5625416;R-HSA-5624952
R-HSA-68882	Mitotic Anaphase	1	207	0.0149254	0.982755	0.982755	1	11	0.000944774	9606	Homo sapiens	RAPSN		R-HSA-174202
R-HSA-2555396	Mitotic Metaphase and Anaphase	1	208	0.0149975	0.983092	0.983092	1	12	0.00103066	9606	Homo sapiens	RAPSN		R-HSA-174202
R-HSA-195258	RHO GTPase Effectors	2	315	0.0227125	0.985282	0.985282	8	107	0.00919007	9606	Homo sapiens	DAAM1;NCF1		R-HSA-3858489;R-HSA-5668629;R-HSA-5218827;R-HSA-3858495;R-HSA-5218841;R-HSA-5668735;R-HSA-5668605;R-HSA-5668731
R-HSA-201681	TCF dependent signaling in response to WNT	1	216	0.0155743	0.985566	0.985566	4	71	0.00609808	9606	Homo sapiens	RAPSN		R-HSA-1504193;R-HSA-4641260;R-HSA-3640874;R-HSA-4641256
R-HSA-8978868	Fatty acid metabolism	3	429	0.0309323	0.990358	0.990358	3	217	0.0186378	9606	Homo sapiens	CYP2C9;ALOXE3		R-HSA-2161814;R-HSA-8942208;R-HSA-2161899
R-HSA-5653656	Vesicle-mediated transport	8	818	0.0589805	0.99113	0.99113	43	251	0.021558	9606	Homo sapiens	SH3GL3;CD163;GJB4;STON2;FOLR3;SCARF1;CD55;GULP1		R-HSA-8868230;R-HSA-5694418;R-HSA-203973;R-HSA-5694417;R-HSA-6809006;R-HSA-8868236;R-HSA-6809003;R-HSA-2168883;R-HSA-6809011;R-HSA-6809010;R-HSA-190682;R-HSA-5694410;R-HSA-8871194;R-HSA-8871193;R-HSA-5694409;R-HSA-8868071;R-HSA-8863463;R-HSA-8866279;R-HSA-6807877;R-HSA-3221843;R-HSA-6807875;R-HSA-8863727;R-HSA-5694527;R-HSA-204008;R-HSA-8867756;R-HSA-2197645;R-HSA-5694522;R-HSA-8863723;R-HSA-8868…
R-HSA-74160	Gene expression (Transcription)	21	1674	0.120701	0.991288	0.991288	46	819	0.0703427	9606	Homo sapiens	PIWIL2;CDKN1A;CSF2;GADD45A;HNF4A;SESN2;PMAIP1;TNFRSF10B;RAPSN;BBC3;VEGFA		R-HSA-9008456;R-HSA-3215152;R-HSA-4331331;R-HSA-8938251;R-HSA-8865280;R-HSA-5631903;R-HSA-139913;R-HSA-5601883;R-HSA-4331340;R-HSA-5629189;R-HSA-5631941;R-HSA-8952408;R-HSA-8939801;R-HSA-9008475;R-HSA-5633414;R-HSA-5629187;R-HSA-5601922;R-HSA-3215144;R-HSA-8957265;R-HSA-9009362;R-HSA-6803388;R-HSA-8865244;R-HSA-187934;R-HSA-5601929;R-HSA-6791109;R-HSA-5601910;R-HSA-5603062;R-HSA-6791235;R-HSA-887…
R-HSA-157118	Signaling by NOTCH	1	257	0.0185305	0.993592	0.993592	1	152	0.0130551	9606	Homo sapiens	RAPSN		R-HSA-9604642
R-HSA-156580	Phase II - Conjugation of compounds	1	258	0.0186026	0.993718	0.993718	1	70	0.0060122	9606	Homo sapiens	CHAC1		R-HSA-6785928
R-HSA-418594	G alpha (i) signalling events	4	556	0.0400894	0.99503	0.99503	10	147	0.0126256	9606	Homo sapiens	PDE6G;CHRM4;ABCA4;ITPR1		R-HSA-74065;R-HSA-169683;R-HSA-2584246;R-HSA-169680;R-HSA-749454;R-HSA-2466749;R-HSA-74059;R-HSA-749456;R-HSA-380073;R-HSA-1467466
R-HSA-913531	Interferon Signaling	2	388	0.0279761	0.995871	0.995871	2	51	0.00438031	9606	Homo sapiens	MT2A		R-HSA-1031716;R-HSA-1031713
R-HSA-199991	Membrane Trafficking	5	659	0.047516	0.996382	0.996382	38	218	0.0187237	9606	Homo sapiens	SH3GL3;GJB4;STON2;FOLR3;CD55		R-HSA-8868230;R-HSA-5694418;R-HSA-203973;R-HSA-5694417;R-HSA-6809006;R-HSA-8868236;R-HSA-6809003;R-HSA-6809011;R-HSA-6809010;R-HSA-190682;R-HSA-5694410;R-HSA-8871194;R-HSA-8871193;R-HSA-5694409;R-HSA-8868071;R-HSA-8863463;R-HSA-8866279;R-HSA-6807877;R-HSA-6807875;R-HSA-8863727;R-HSA-5694527;R-HSA-204008;R-HSA-8867756;R-HSA-5694522;R-HSA-8863723;R-HSA-8868651;R-HSA-8867754;R-HSA-8863721;R-HSA-8868…
R-HSA-71387	Metabolism of carbohydrates	2	413	0.0297786	0.997351	0.997351	2	213	0.0182943	9606	Homo sapiens	HKDC1;HS3ST2		R-HSA-70420;R-HSA-2076611
R-HSA-446203	Asparagine N-linked glycosylation	2	420	0.0302834	0.997663	0.997663	17	143	0.0122821	9606	Homo sapiens	FOLR3;CD55		R-HSA-6807877;R-HSA-6807875;R-HSA-5694418;R-HSA-203973;R-HSA-5694417;R-HSA-6809006;R-HSA-5694527;R-HSA-204008;R-HSA-6809003;R-HSA-5694522;R-HSA-5694439;R-HSA-6809011;R-HSA-6809010;R-HSA-5694446;R-HSA-5694410;R-HSA-5694441;R-HSA-5694409
R-HSA-5663205	Infectious disease	3	537	0.0387194	0.998342	0.998342	5	328	0.0281714	9606	Homo sapiens	SH3GL3;FYN;RAPSN		R-HSA-8876262;R-HSA-8876255;R-HSA-180603;R-HSA-200908;R-HSA-180573
R-HSA-194315	Signaling by Rho GTPases	2	446	0.0321581	0.998535	0.998535	8	112	0.00961951	9606	Homo sapiens	DAAM1;NCF1		R-HSA-3858489;R-HSA-5668629;R-HSA-5218827;R-HSA-3858495;R-HSA-5218841;R-HSA-5668735;R-HSA-5668605;R-HSA-5668731
R-HSA-1852241	Organelle biogenesis and maintenance	1	334	0.0240825	0.998615	0.998615	8	86	0.00738641	9606	Homo sapiens	KIF17		R-HSA-5624949;R-HSA-5624948;R-HSA-5624951;R-HSA-5625424;R-HSA-5625426;R-HSA-5625421;R-HSA-5625416;R-HSA-5624952
R-HSA-1643685	Disease	15	1512	0.10902	0.999242	0.999242	37	944	0.0810788	9606	Homo sapiens	FLG;SH3GL3;CDKN1A;KCNJ11;ABCA4;ABCC9;RASAL2;THSD1;ADAMTS20;KITLG;FYN;TLR10;RAPSN		R-HSA-2023455;R-HSA-5678418;R-HSA-2399969;R-HSA-2023451;R-HSA-5654544;R-HSA-5654545;R-HSA-5655326;R-HSA-5655263;R-HSA-8853325;R-HSA-8853322;R-HSA-200908;R-HSA-5387392;R-HSA-2466802;R-HSA-8876255;R-HSA-5655240;R-HSA-180573;R-HSA-1839100;R-HSA-8876262;R-HSA-1839098;R-HSA-1839094;R-HSA-5655290;R-HSA-1982066;R-HSA-2400009;R-HSA-8866858;R-HSA-1982065;R-HSA-5655269;R-HSA-5655266;R-HSA-6802834;R-HSA-565…
R-HSA-1640170	Cell Cycle	4	681	0.0491023	0.999303	0.999303	37	423	0.0363308	9606	Homo sapiens	CDKN1A;RAPSN		R-HSA-187520;R-HSA-8852354;R-HSA-8942607;R-HSA-8852362;R-HSA-187916;R-HSA-264458;R-HSA-8941915;R-HSA-68948;R-HSA-198613;R-HSA-68825;R-HSA-69016;R-HSA-8942803;R-HSA-8854044;R-HSA-174105;R-HSA-6803388;R-HSA-187934;R-HSA-188191;R-HSA-69600;R-HSA-187552;R-HSA-9018017;R-HSA-174058;R-HSA-69227;R-HSA-6803403;R-HSA-174255;R-HSA-8854071;R-HSA-75825;R-HSA-6803411;R-HSA-187574;R-HSA-187575;R-HSA-187828;R-HS…
R-HSA-68886	M Phase	1	389	0.0280482	0.999539	0.999539	1	66	0.00566864	9606	Homo sapiens	RAPSN		R-HSA-174202
R-HSA-162582	Signal Transduction	39	3114	0.22453	0.999641	0.999641	225	2100	0.180366	9606	Homo sapiens	FLG;PPP1R15A;SH3GL3;CDKN1A;CSF2;NCF1;CHRM4;ITPR1;TNFAIP3;LAMC2;RASAL2;RASGRP1;PIK3CG;DUSP10;ACVR1C;FYN;TAC1;CD55;PDE6G;NOS3;GPR35;MMP3;ABCA4;TNFRSF10B;GRIN2C;PGF;VEGFA;GULP1;KITLG;GDNF;DAAM1;MYO1A;GNRH2;TRIB3;RAPSN		R-HSA-178178;R-HSA-3858489;R-HSA-205319;R-HSA-3858495;R-HSA-1562641;R-HSA-141316;R-HSA-1562640;R-HSA-205321;R-HSA-178189;R-HSA-5654596;R-HSA-205328;R-HSA-5654597;R-HSA-5654594;R-HSA-390673;R-HSA-5654592;R-HSA-3640874;R-HSA-5654600;R-HSA-5658231;R-HSA-4420202;R-HSA-5693055;R-HSA-1470012;R-HSA-1470010;R-HSA-1470011;R-HSA-4420206;R-HSA-1470009;R-HSA-3965450;R-HSA-879674;R-HSA-4420099;R-HSA-5218830;R…
R-HSA-556833	Metabolism of lipids	13	1433	0.103324	0.999647	0.999647	14	942	0.080907	9606	Homo sapiens	CYP2C9;CHKA;CPNE7;FHL2;ANKRD1;TRIB3;ALOXE3;PIK3CG		R-HSA-1483222;R-HSA-8942208;R-HSA-1676048;R-HSA-1483004;R-HSA-9027043;R-HSA-2161899;R-HSA-1989747;R-HSA-1989779;R-HSA-9027302;R-HSA-9027321;R-HSA-1676109;R-HSA-2161814;R-HSA-1989767;R-HSA-5333678
R-HSA-597592	Post-translational protein modification	15	1589	0.114572	0.999704	0.999704	46	521	0.0447479	9606	Homo sapiens	PSCA;F10;TNFAIP3;NOD2;FBXO32;THSD1;ADAMTS20;TTLL6;CEACAM1;VGF;GCNT3;ASB5;FOLR3;CD55;RAPSN		R-HSA-8956040;R-HSA-688136;R-HSA-5173005;R-HSA-5694418;R-HSA-8869506;R-HSA-203973;R-HSA-5173192;R-HSA-5694417;R-HSA-6809006;R-HSA-159819;R-HSA-5690845;R-HSA-6809003;R-HSA-159757;R-HSA-8956184;R-HSA-914012;R-HSA-8955289;R-HSA-6809011;R-HSA-6809010;R-HSA-5689539;R-HSA-5665871;R-HSA-5694410;R-HSA-5690827;R-HSA-5694409;R-HSA-5690870;R-HSA-8956200;R-HSA-8955241;R-HSA-6807877;R-HSA-8952618;R-HSA-680787…
R-HSA-372790	Signaling by GPCR	12	1414	0.101954	0.999826	0.999826	27	386	0.033153	9606	Homo sapiens	PDE6G;MYO1A;GPR35;CHRM4;ABCA4;MMP3;GNRH2;ITPR1;TAC1;RASGRP1;CD55;PIK3CG		R-HSA-749448;R-HSA-749454;R-HSA-383363;R-HSA-749452;R-HSA-383373;R-HSA-391372;R-HSA-74059;R-HSA-139854;R-HSA-74065;R-HSA-169683;R-HSA-2584246;R-HSA-169680;R-HSA-390673;R-HSA-2466749;R-HSA-749456;R-HSA-1467466;R-HSA-392295;R-HSA-139941;R-HSA-380076;R-HSA-392300;R-HSA-2179402;R-HSA-380073;R-HSA-379048;R-HSA-6805205;R-HSA-2179413;R-HSA-879674;R-HSA-392831
R-HSA-69278	Cell Cycle, Mitotic	2	569	0.0410268	0.999846	0.999846	31	334	0.0286868	9606	Homo sapiens	CDKN1A;RAPSN		R-HSA-187520;R-HSA-8852354;R-HSA-8942607;R-HSA-8852362;R-HSA-187916;R-HSA-8941915;R-HSA-68948;R-HSA-198613;R-HSA-68825;R-HSA-69016;R-HSA-8942803;R-HSA-8854044;R-HSA-174105;R-HSA-187934;R-HSA-188191;R-HSA-187552;R-HSA-9018017;R-HSA-174058;R-HSA-69227;R-HSA-174255;R-HSA-8854071;R-HSA-75825;R-HSA-187574;R-HSA-187575;R-HSA-187828;R-HSA-174202;R-HSA-174203;R-HSA-69562;R-HSA-1226094;R-HSA-8942836;R-HSA…
R-HSA-388396	GPCR downstream signalling	10	1347	0.0971231	0.999947	0.999947	20	216	0.0185519	9606	Homo sapiens	PDE6G;MYO1A;CHRM4;ABCA4;MMP3;GNRH2;ITPR1;TAC1;RASGRP1;PIK3CG		R-HSA-392295;R-HSA-749448;R-HSA-749454;R-HSA-749452;R-HSA-139941;R-HSA-392300;R-HSA-74059;R-HSA-2179402;R-HSA-139854;R-HSA-380073;R-HSA-379048;R-HSA-74065;R-HSA-169683;R-HSA-2584246;R-HSA-169680;R-HSA-2179413;R-HSA-2466749;R-HSA-392831;R-HSA-749456;R-HSA-1467466
R-HSA-392499	Metabolism of proteins	25	2432	0.175355	0.999959	0.999959	58	916	0.0786739	9606	Homo sapiens	WARS;F10;PSCA;ASNS;SARS;TNFAIP3;NOD2;FBXO32;THSD1;ADAMTS20;ERN1;TTLL6;CEACAM1;VGF;DDIT3;GCNT3;GARS;ASB5;FOLR3;CD55;ATF3;RAPSN		R-HSA-8956040;R-HSA-688136;R-HSA-5694418;R-HSA-8869506;R-HSA-5173192;R-HSA-5694417;R-HSA-5690845;R-HSA-159757;R-HSA-8956184;R-HSA-8955289;R-HSA-1791118;R-HSA-380048;R-HSA-5689539;R-HSA-1791107;R-HSA-5665871;R-HSA-5694410;R-HSA-5690827;R-HSA-5694409;R-HSA-5690870;R-HSA-8956200;R-HSA-6807877;R-HSA-8952618;R-HSA-6807875;R-HSA-8952620;R-HSA-381217;R-HSA-381091;R-HSA-381109;R-HSA-5694439;R-HSA-5694446…
R-HSA-8953854	Metabolism of RNA	2	782	0.0563847	0.999997	0.999997	7	187	0.0160612	9606	Homo sapiens	RAPSN;ZFP36L1		R-HSA-450406;R-HSA-450517;R-HSA-482788;R-HSA-450466;R-HSA-450474;R-HSA-450490;R-HSA-450488
R-HSA-1430728	Metabolism	36	3585	0.25849	1	1	75	2184	0.187581	9606	Homo sapiens	CPNE7;ITPR1;FHL2;SLC2A3;SLC3A2;PIK3CG;ANKRD1;HMOX1;PHGDH;CHAC1;CRYM;ALOXE3;SLC19A2;ARG2;AOC2;CHKA;KCNJ11;SMOX;NOS3;DIO2;ASNS;SARS;HS3ST2;SLC7A5;CYP2C9;MTHFD2;PSAT1;HKDC1;TRIB3;RAPSN		R-HSA-76416;R-HSA-8942208;R-HSA-1676048;R-HSA-202127;R-HSA-1989779;R-HSA-203662;R-HSA-202129;R-HSA-76434;R-HSA-211991;R-HSA-70420;R-HSA-211988;R-HSA-202132;R-HSA-1989767;R-HSA-202137;R-HSA-141341;R-HSA-198818;R-HSA-203553;R-HSA-203680;R-HSA-202144;R-HSA-76453;R-HSA-212005;R-HSA-212004;R-HSA-76456;R-HSA-211881;R-HSA-203567;R-HSA-1497784;R-HSA-203565;R-HSA-2161814;R-HSA-203700;R-HSA-76475;R-HSA-977…

## Sheet: results_MUGkdoba67vsdmso_1
log2FoldChange	SYMBOL	GENENAME	baseMean	padj	Row.names
-0.471634	TSPAN6	tetraspanin 6	551.309	1.34668e-09	ENSG00000000003
0.671013	DPM1	dolichyl-phosphate mannosyltransferase subunit 1, catalytic	2293.11	4.33633e-60	ENSG00000000419
0.176707	SCYL3	SCY1 like pseudokinase 3	257.892	0.143184	ENSG00000000457
0.29068	C1orf112	chromosome 1 open reading frame 112	629.219	0.000120636	ENSG00000000460
-0.294529	FGR	FGR proto-oncogene, Src family tyrosine kinase	3.51803	0.791395	ENSG00000000938
-0.333043	CFH	complement factor H	3690.98	1.38994e-21	ENSG00000000971
-0.114175	FUCA2	alpha-L-fucosidase 2	1792.94	0.012633	ENSG00000001036
0.843841	GCLC	glutamate-cysteine ligase catalytic subunit	1002.6	1.62374e-45	ENSG00000001084
0.229294	NFYA	nuclear transcription factor Y subunit alpha	1360.6	8.13144e-06	ENSG00000001167
0.0239121	STPG1	sperm tail PG-rich repeat containing 1	388.066	0.822378	ENSG00000001460
0.201443	NIPAL3	NIPA like domain containing 3	1619.12	2.80606e-05	ENSG00000001461
0.700037	LAS1L	LAS1 like, ribosome biogenesis factor	1529.77	5.94221e-45	ENSG00000001497
-0.0804253	ENPP4	ectonucleotide pyrophosphatase/phosphodiesterase 4	981.064	0.221158	ENSG00000001561
1.49511	SEMA3F	semaphorin 3F	89.3888	4.25146e-14	ENSG00000001617
-1.94061	CFTR	cystic fibrosis transmembrane conductance regulator	7.71088	0.0111073	ENSG00000001626
0.0796168	ANKIB1	ankyrin repeat and IBR domain containing 1	2746.75	0.0446227	ENSG00000001629
-0.305654	CYP51A1	cytochrome P450 family 51 subfamily A member 1	2230.37	7.47448e-11	ENSG00000001630
-0.235483	KRIT1	KRIT1, ankyrin repeat containing	1759.84	1.06668e-06	ENSG00000001631
-0.178214	RAD52	RAD52 homolog, DNA repair protein	228.63	0.153797	ENSG00000002016
-0.44187	BAD	BCL2 associated agonist of cell death	1286.34	8.10302e-18	ENSG00000002330
-0.658095	LAP3	leucine aminopeptidase 3	1817.19	1.74663e-50	ENSG00000002549
-0.336941	CD99	CD99 molecule (Xg blood group)	2126.31	0.0138235	ENSG00000002586
-1.24925	HS3ST1	heparan sulfate-glucosamine 3-sulfotransferase 1	768.796	4.81433e-73	ENSG00000002587
0.482575	WNT16	Wnt family member 16	4.55024	0.605014	ENSG00000002745
-1.06747	HECW1	HECT, C2 and WW domain containing E3 ubiquitin protein ligase 1	109.378	5.53051e-10	ENSG00000002746
1.15508	MAD1L1	mitotic arrest deficient 1 like 1	1153.94	4.10088e-96	ENSG00000002822
-0.25906	LASP1	LIM and SH3 protein 1	7302.49	2.15562e-19	ENSG00000002834
0.453831	SNX11	sorting nexin 11	638.573	2.38152e-10	ENSG00000002919
0.701031	M6PR	mannose-6-phosphate receptor, cation dependent	1742.45	4.86323e-54	ENSG00000003056
-0.666303	KLHL13	kelch like family member 13	11.7938	0.24904	ENSG00000003096
-0.0124231	CYP26B1	cytochrome P450 family 26 subfamily B member 1	256.196	0.924827	ENSG00000003137
-0.86849	ICA1	islet cell autoantigen 1	216.576	5.61338e-13	ENSG00000003147
-0.981726	DBNDD1	dysbindin domain containing 1	647.585	7.65308e-43	ENSG00000003249
1.15956	ALS2	ALS2, alsin Rho guanine nucleotide exchange factor	2596.78	3.41761e-189	ENSG00000003393
-0.0983453	CASP10	caspase 10	31.6049	0.789506	ENSG00000003400
-0.0318701	CFLAR	CASP8 and FADD like apoptosis regulator	922.575	0.645201	ENSG00000003402
0.572883	TFPI	tissue factor pathway inhibitor	640.136	5.48767e-16	ENSG00000003436
0.690852	NDUFAF7	NADH:ubiquinone oxidoreductase complex assembly factor 7	483.52	1.26159e-17	ENSG00000003509
0.433533	RBM5	RNA binding motif protein 5	3363.79	4.45023e-35	ENSG00000003756
-0.580116	MTMR7	myotubularin related protein 7	715.722	2.64131e-17	ENSG00000003987
-1.48556	SLC7A2	solute carrier family 7 member 2	2659.36	2.90698e-237	ENSG00000003989
-0.651331	ARF5	ADP ribosylation factor 5	2503.06	1.09016e-58	ENSG00000004059
-0.52631	SARM1	sterile alpha and TIR motif containing 1	275.025	4.6101e-06	ENSG00000004139
-0.0430968	POLDIP2	DNA polymerase delta interacting protein 2	2806.4	0.312654	ENSG00000004142
-0.404831	PLXND1	plexin D1	1537.02	4.66253e-16	ENSG00000004399
0.304871	AK2	adenylate kinase 2	3315.05	1.20658e-18	ENSG00000004455
-0.553852	CD38	CD38 molecule	4.64491	0.553936	ENSG00000004468
-0.374591	FKBP4	FK506 binding protein 4	1412.03	3.93324e-14	ENSG00000004478
-0.262765	KDM1A	lysine demethylase 1A	2554.64	4.218e-12	ENSG00000004487
0.0746454	RBM6	RNA binding motif protein 6	2322.68	0.0887943	ENSG00000004534
-0.477443	CAMKK1	calcium/calmodulin dependent protein kinase kinase 1	182.937	0.000321637	ENSG00000004660
0.268597	RECQL	RecQ like helicase	1016.12	1.09739e-05	ENSG00000004700
0.419578	VPS50	VPS50, EARP/GARPII complex subunit	1480.96	1.24077e-18	ENSG00000004766
0.842147	HSPB6	heat shock protein family B (small) member 6	10.3101	0.160556	ENSG00000004776
-0.278363	ARHGAP33	Rho GTPase activating protein 33	317.014	0.006334	ENSG00000004777
-0.534427	NDUFAB1	NADH:ubiquinone oxidoreductase subunit AB1	1540.99	9.64075e-30	ENSG00000004779
-1.72448	PDK4	pyruvate dehydrogenase kinase 4	682.639	2.34253e-106	ENSG00000004799
-0.799807	ZMYND10	zinc finger MYND-type containing 10	79.3081	6.74901e-05	ENSG00000004838
4.1334	ABCB5	ATP binding cassette subfamily B member 5	22.6922	5.99147e-11	ENSG00000004846
-1.33615	ARX	aristaless related homeobox	3.96482	0.190408	ENSG00000004848
0.0648755	SLC25A13	solute carrier family 25 member 13	1649.06	0.263593	ENSG00000004864
0.601393	ST7	suppression of tumorigenicity 7	1335.69	1.00846e-29	ENSG00000004866
0.601393	ST7-OT3	ST7 overlapping transcript 3	1335.69	1.00846e-29	ENSG00000004866
-0.428219	CDC27	cell division cycle 27	2986.45	1.65305e-32	ENSG00000004897
2.38687	CALCR	calcitonin receptor	4.39299	0.0242193	ENSG00000004948
1.06709	HCCS	holocytochrome c synthase	1257.44	1.6586e-86	ENSG00000004961
0.536587	DVL2	dishevelled segment polarity protein 2	1084.62	7.6318e-22	ENSG00000004975
0.7279	UPF1	UPF1, RNA helicase and ATPase	3414.11	4.01441e-90	ENSG00000005007
0.108848	SKAP2	src kinase associated phosphoprotein 2	4427.16	0.00331336	ENSG00000005020
-0.420727	SLC25A5	solute carrier family 25 member 5	6563.07	4.29877e-46	ENSG00000005022
-0.926033	MCUB	mitochondrial calcium uniporter dominant negative beta subunit	872.156	1.73749e-51	ENSG00000005059
-0.567442	HOXA11	homeobox A11	71.3405	0.0101697	ENSG00000005073
0.383677	POLR2J	RNA polymerase II subunit J	649.292	1.32081e-07	ENSG00000005075
0.305566	DHX33	DEAH-box helicase 33	741.332	5.6619e-06	ENSG00000005100
-2.85062	MEOX1	mesenchyme homeobox 1	10.3437	5.29107e-05	ENSG00000005102
2.69501	THSD7A	thrombospondin type 1 domain containing 7A	22.2483	7.13629e-09	ENSG00000005108
-0.857139	LIG3	DNA ligase 3	530.428	7.6635e-26	ENSG00000005156
0.839771	RPAP3	RNA polymerase II associated protein 3	1759.49	1.86858e-76	ENSG00000005175
-1.01793	ACSM3	acyl-CoA synthetase medium chain family member 3	23.1794	0.0081424	ENSG00000005187
0.0722268	REXO5	RNA exonuclease 5	261.734	0.569215	ENSG00000005189
0.447438	CIAPIN1	cytokine induced apoptosis inhibitor 1	1765.37	1.78776e-23	ENSG00000005194
-0.217234	FAM214B	family with sequence similarity 214 member B	401.195	0.02244	ENSG00000005238
-1.01906	COPZ2	coatomer protein complex subunit zeta 2	855.223	4.41038e-59	ENSG00000005243
1.4201	PRKAR2B	protein kinase cAMP-dependent type II regulatory subunit beta	295.612	7.77943e-39	ENSG00000005249
-0.318114	MSL3	MSL complex subunit 3	491.474	7.71842e-05	ENSG00000005302
1.04838	CREBBP	CREB binding protein	2382.51	6.68548e-146	ENSG00000005339
2.12499	TSPOAP1	TSPO associated protein 1	1.87562	0.188174	ENSG00000005379
0.167068	GCFC2	GC-rich sequence DNA-binding factor 2	663.292	0.0223523	ENSG00000005436
-0.308794	WDR54	WD repeat domain 54	395.145	0.000617416	ENSG00000005448
-0.591424	CROT	carnitine O-octanoyltransferase	984.593	1.22794e-24	ENSG00000005469
-3.13745	ABCB4	ATP binding cassette subfamily B member 4	40.3769	6.03323e-17	ENSG00000005471
0.437814	KMT2E	lysine methyltransferase 2E	2628.26	4.26805e-29	ENSG00000005483
0.155504	RHBDD2	rhomboid domain containing 2	1484.82	0.00321585	ENSG00000005486
-0.127255	IBTK	inhibitor of Bruton tyrosine kinase	1158.17	0.0259996	ENSG00000005700
1.08158	ZNF195	zinc finger protein 195	1144.63	3.87379e-79	ENSG00000005801
0.934146	MYCBP2	MYC binding protein 2, E3 ubiquitin protein ligase	1982.83	2.69581e-105	ENSG00000005810
0.0125991	FBXL3	F-box and leucine rich repeat protein 3	1694.18	0.817866	ENSG00000005812
-0.620848	ITGAL	integrin subunit alpha L	2.34818	0.662555	ENSG00000005844
-0.730009	PDK2	pyruvate dehydrogenase kinase 2	292.4	2.29152e-12	ENSG00000005882
-1.02915	ITGA3	integrin subunit alpha 3	22784.3	0	ENSG00000005884
0.532695	ZFX	zinc finger protein, X-linked	1000.67	2.93468e-17	ENSG00000005889
0.221839	LAMP2	lysosomal associated membrane protein 2	5536.76	8.22961e-14	ENSG00000005893
-0.616197	ITGA2B	integrin subunit alpha 2b	23.928	0.101392	ENSG00000005961
-3.52458	ASB4	ankyrin repeat and SOCS box containing 4	2.12508	0.0333312	ENSG00000005981
-0.177115	GDE1	glycerophosphodiester phosphodiesterase 1	2252.04	1.07453e-05	ENSG00000006007
-0.738737	REX1BD	required for excision 1-B domain containing	545.963	1.18654e-21	ENSG00000006015
-0.144746	CRLF1	cytokine receptor like factor 1	136.15	0.379612	ENSG00000006016
-0.0745052	OSBPL7	oxysterol binding protein like 7	401.126	0.46837	ENSG00000006025
-1.18596	TMEM98	transmembrane protein 98	201.377	1.42306e-19	ENSG00000006042
-1.76339	YBX2	Y-box binding protein 2	3.55738	0.355386	ENSG00000006047
0.301217	TMEM132A	transmembrane protein 132A	232.386	0.013637	ENSG00000006118
-0.20215	AP2B1	adaptor related protein complex 2 beta 1 subunit	6317.65	7.97811e-12	ENSG00000006125
4.35552	TAC1	tachykinin precursor 1	74.8776	7.81982e-33	ENSG00000006128
0.705842	ZNF263	zinc finger protein 263	1411.7	3.6176e-44	ENSG00000006194
-1.01105	CX3CL1	C-X3-C motif chemokine ligand 1	121.124	7.69627e-10	ENSG00000006210
-0.933575	SPATA20	spermatogenesis associated 20	1149.76	2.77026e-64	ENSG00000006282
0.465068	CACNA1G	calcium voltage-gated channel subunit alpha1 G	35.274	0.13765	ENSG00000006283
0.447866	TNFRSF12A	TNF receptor superfamily member 12A	5005.17	5.29497e-42	ENSG00000006327
-0.448624	DLX6	distal-less homeobox 6	58.4565	0.0727366	ENSG00000006377
0.154821	MAP3K9	mitogen-activated protein kinase kinase kinase 9	400.464	0.10423	ENSG00000006432
0.0715271	RALA	RAS like proto-oncogene A	1925.47	0.128219	ENSG00000006451
0.0786877	BAIAP2L1	BAI1 associated protein 2 like 1	1293.89	0.1593	ENSG00000006453
1.53319	KDM7A	lysine demethylase 7A	172.334	1.24527e-24	ENSG00000006459
-2.0297	ETV1	ETS variant 1	2106.76	0	ENSG00000006468
-0.668506	AGK	acylglycerol kinase	2581.12	4.66366e-69	ENSG00000006530
-0.762276	ALDH3B1	aldehyde dehydrogenase 3 family member B1	965.67	5.25189e-40	ENSG00000006534
-0.572135	PHTF2	putative homeodomain transcription factor 2	2094.55	6.54496e-39	ENSG00000006576
2.56529	CCL26	C-C motif chemokine ligand 26	2.37765	0.0843995	ENSG00000006606
-0.119435	FARP2	FERM, ARH/RhoGEF and pleckstrin domain protein 2	607.065	0.136342	ENSG00000006607
-0.0431265	GGCT	gamma-glutamylcyclotransferase	2075.96	0.382262	ENSG00000006625
-0.791959	DBF4	DBF4 zinc finger	1683.43	4.17667e-68	ENSG00000006634
-0.520279	TBXA2R	thromboxane A2 receptor	35.1741	0.0940587	ENSG00000006638
0.996347	IFRD1	interferon related developmental regulator 1	4040.36	3.87546e-208	ENSG00000006652
0.851979	COX10	COX10, heme A:farnesyltransferase cytochrome c oxidase assembly factor	234.047	7.37655e-13	ENSG00000006695
0.138259	GTF2IRD1	GTF2I repeat domain containing 1	1335.8	0.0123133	ENSG00000006704
-0.307997	PAF1	PAF1 homolog, Paf1/RNA polymerase II complex component	2554.17	3.11411e-15	ENSG00000006712
0.483026	VPS41	VPS41, HOPS complex subunit	4151.68	8.21035e-53	ENSG00000006715
0.247158	ARHGAP44	Rho GTPase activating protein 44	3.8164	0.814258	ENSG00000006740
-0.436784	ELAC2	elaC ribonuclease Z 2	651.812	1.10429e-09	ENSG00000006744
-2.24169	SCIN	scinderin	59.3012	7.09693e-18	ENSG00000006747
-0.614929	ARSD	arylsulfatase D	463.833	5.20364e-12	ENSG00000006756
-0.589575	PNPLA4	patatin like phospholipase domain containing 4	472.808	9.82706e-13	ENSG00000006757
0.302618	ADIPOR2	adiponectin receptor 2	1425.94	1.43022e-09	ENSG00000006831
1.09538	CDKL3	cyclin dependent kinase like 3	142.745	8.87214e-13	ENSG00000006837
0.120417	MARK4	microtubule affinity regulating kinase 4	1076.29	0.0441932	ENSG00000007047
0.0649495	CCDC124	coiled-coil domain containing 124	1759.87	0.196108	ENSG00000007080
0.199638	PAFAH1B1	platelet activating factor acetylhydrolase 1b regulatory subunit 1	2615.19	2.2284e-07	ENSG00000007168
-1.57271	DNAH9	dynein axonemal heavy chain 9	190.133	3.80054e-32	ENSG00000007174
-0.810094	KIAA0100	KIAA0100	3975.53	1.01813e-124	ENSG00000007202
0.23739	GAS7	growth arrest specific 7	67.5465	0.316906	ENSG00000007237
-0.553956	TRAPPC6A	trafficking protein particle complex 6A	355.809	3.12459e-09	ENSG00000007255
2.59007	MATK	megakaryocyte-associated tyrosine kinase	4.91385	0.0123966	ENSG00000007264
0.3436	CD79B	CD79b molecule	1.95512	0.813633	ENSG00000007312
1.89556	SCN4A	sodium voltage-gated channel alpha subunit 4	4.93494	0.0478531	ENSG00000007314
0.568027	ST7L	suppression of tumorigenicity 7 like	362.382	3.78692e-09	ENSG00000007341
-0.784707	TKTL1	transketolase like 1	4.70481	0.388195	ENSG00000007350
0.52408	PAX6	paired box 6	42.2917	0.0663919	ENSG00000007372
-0.415062	RPUSD1	RNA pseudouridylate synthase domain containing 1	655.263	2.30845e-08	ENSG00000007376
-0.845273	RHBDF1	rhomboid 5 homolog 1	966.909	4.02373e-44	ENSG00000007384
0.524797	LUC7L	LUC7 like	689.346	1.60257e-13	ENSG00000007392
0.418493	CACNA2D2	calcium voltage-gated channel auxiliary subunit alpha2delta 2	43.9013	0.153696	ENSG00000007402
0.97853	BAIAP3	BAI1 associated protein 3	30.7438	0.00372743	ENSG00000007516
-0.367864	TSR3	TSR3, acp transferase ribosome maturation factor	1046.6	9.612e-11	ENSG00000007520
-0.0897067	PIGQ	phosphatidylinositol glycan anchor biosynthesis class Q	881.945	0.178609	ENSG00000007541
0.133097	CRAMP1	cramped chromatin regulator homolog 1	923.247	0.0356463	ENSG00000007545
-0.521779	TEAD3	TEA domain transcription factor 3	668.6	1.1799e-12	ENSG00000007866
0.273825	DNAJC11	DnaJ heat shock protein family (Hsp40) member C11	928.169	5.02391e-06	ENSG00000007923
-0.444648	FMO3	flavin containing monooxygenase 3	26.2275	0.238071	ENSG00000007933
3.13032	MYLIP	myosin regulatory light chain interacting protein	727.853	4.65428e-271	ENSG00000007944
0.251169	NOX1	NADPH oxidase 1	17.9797	0.621367	ENSG00000007952
-0.339869	E2F2	E2F transcription factor 2	329.778	0.000760229	ENSG00000007968
-0.0760996	PSMB1	proteasome subunit beta 1	2410.48	0.074938	ENSG00000008018
0.626462	SYN1	synapsin I	15.408	0.206134	ENSG00000008056
1.03122	JARID2	jumonji and AT-rich interaction domain containing 2	289.155	6.33506e-21	ENSG00000008083
-0.249814	CDKL5	cyclin dependent kinase like 5	205.071	0.0557165	ENSG00000008086
1.87176	CAMK1G	calcium/calmodulin dependent protein kinase IG	2.41628	0.166763	ENSG00000008118
1.03406	CDK11A	cyclin dependent kinase 11A	554.069	8.94834e-37	ENSG00000008128
-0.317251	NADK	NAD kinase	1088.92	2.31238e-08	ENSG00000008130
-0.680853	DLEC1	deleted in lung and esophageal cancer 1	13.6404	0.186883	ENSG00000008226
-0.224608	CYTH3	cytohesin 3	3783.71	1.06958e-09	ENSG00000008256
-1.15175	ADAM22	ADAM metallopeptidase domain 22	370.031	1.13271e-34	ENSG00000008277
-0.126537	SYPL1	synaptophysin like 1	4087.17	0.000479247	ENSG00000008282
-0.0381487	CYB561	cytochrome b561	596.286	0.669389	ENSG00000008283
1.00484	SPAG9	sperm associated antigen 9	10988.9	0	ENSG00000008294
0.728305	CELSR3	cadherin EGF LAG seven-pass G-type receptor 3	652.021	2.9569e-24	ENSG00000008300
1.34105	AASS	aminoadipate-semialdehyde synthase	395.542	3.34455e-47	ENSG00000008311
-1.76868	PLEKHG6	pleckstrin homology and RhoGEF domain containing G6	29.9406	4.7532e-07	ENSG00000008323
0.0314089	SS18L2	SS18 like 2	507.348	0.727908	ENSG00000008324
-0.772487	MPND	MPN domain containing	318.915	9.98437e-15	ENSG00000008382
-0.684999	MGST1	microsomal glutathione S-transferase 1	2774.11	6.68839e-74	ENSG00000008394
1.36861	CRY1	cryptochrome circadian regulator 1	2476.41	1.85134e-254	ENSG00000008405
-0.345034	NFIX	nuclear factor I X	2437.72	6.93943e-18	ENSG00000008441
-0.536639	ST3GAL1	ST3 beta-galactoside alpha-2,3-sialyltransferase 1	4749.8	9.83885e-55	ENSG00000008513
0.0384426	MMP25	matrix metallopeptidase 25	54.8846	0.898393	ENSG00000008516
1.99517	IL32	interleukin 32	35.6516	2.48488e-09	ENSG00000008517
0.31722	PKD1	polycystin 1, transient receptor potential channel interacting	2164.23	5.56059e-14	ENSG00000008710
0.755357	MAPK8IP2	mitogen-activated protein kinase 8 interacting protein 2	168.323	3.79189e-08	ENSG00000008735
0.358916	MED24	mediator complex subunit 24	1304.56	1.40395e-12	ENSG00000008838
-0.800838	RHOBTB2	Rho related BTB domain containing 2	864.617	1.12153e-38	ENSG00000008853
0.394485	HEATR5B	HEAT repeat containing 5B	1151.57	3.11663e-12	ENSG00000008869
0.667019	SEC62	SEC62 homolog, preprotein translocation factor	4407.43	2.36278e-95	ENSG00000008952
0.00929661	RPS20	ribosomal protein S20	16277.1	0.771503	ENSG00000008988
0.0178467	CSDE1	cold shock domain containing E1	15575.7	0.475143	ENSG00000009307
-0.163023	UBE3C	ubiquitin protein ligase E3C	4856.34	2.83115e-07	ENSG00000009335
0.839481	REV3L	REV3 like, DNA directed polymerase zeta catalytic subunit	722.816	4.97758e-34	ENSG00000009413
0.259551	TENM1	teneurin transmembrane protein 1	287.446	0.0195418	ENSG00000009694
1.00077	MASP2	mannan binding lectin serine peptidase 2	156.432	9.45232e-12	ENSG00000009724
0.125214	FAM76A	family with sequence similarity 76 member A	400.257	0.208044	ENSG00000009780
-0.607239	TRAF3IP3	TRAF3 interacting protein 3	36.2321	0.0461061	ENSG00000009790
0.223736	POMT2	protein O-mannosyltransferase 2	1014.52	0.000119931	ENSG00000009830
0.38875	VTA1	vesicle trafficking 1	1249.74	5.03801e-13	ENSG00000009844
-1.1438	MLXIPL	MLX interacting protein like	12.2405	0.0410853	ENSG00000009950
0.371775	BAZ1B	bromodomain adjacent to zinc finger domain 1B	7939.13	1.57685e-46	ENSG00000009954
-0.150965	RANBP9	RAN binding protein 9	1729.1	0.00131573	ENSG00000010017
-0.591923	ETV7	ETS variant 7	27.9589	0.10001	ENSG00000010030
0.504935	SPRTN	SprT-like N-terminal domain	592.483	6.95983e-12	ENSG00000010072
0.678355	METTL13	methyltransferase like 13	1401.7	2.82182e-41	ENSG00000010165
0.255791	DYRK4	dual specificity tyrosine phosphorylation regulated kinase 4	320.394	0.0126555	ENSG00000010219
0.623946	ZNF207	zinc finger protein 207	6826.82	2.80144e-88	ENSG00000010244
-0.0514186	UQCRC1	ubiquinol-cytochrome c reductase core protein 1	3814.9	0.155718	ENSG00000010256
-0.63891	STARD3NL	STARD3 N-terminal like	1106.3	9.48561e-30	ENSG00000010270
-0.453941	CD9	CD9 molecule	2160.44	3.72513e-26	ENSG00000010278
-0.429909	NCAPD2	non-SMC condensin I complex subunit D2	1615.72	4.1561e-20	ENSG00000010292
-0.503914	IFFO1	intermediate filament family orphan 1	302.485	2.16767e-06	ENSG00000010295
0.791406	GIPR	gastric inhibitory polypeptide receptor	105.779	5.12569e-05	ENSG00000010310
-0.751511	PHF7	PHD finger protein 7	190.015	3.99873e-08	ENSG00000010318
1.01256	SEMA3G	semaphorin 3G	18.5073	0.0201795	ENSG00000010319
0.543596	NISCH	nischarin	2092.31	1.5344e-40	ENSG00000010322
-0.404475	STAB1	stabilin 1	1.84714	0.78564	ENSG00000010327
-0.583637	FUZ	fuzzy planar cell polarity protein	229.763	6.73836e-07	ENSG00000010361
3.97938	SLC6A13	solute carrier family 6 member 13	5.89244	0.00120018	ENSG00000010379
0.353255	IDS	iduronate 2-sulfatase	2095.52	1.64726e-17	ENSG00000010404
-1.51734	PRSS3	serine protease 3	3.10674	0.202307	ENSG00000010438
0.520415	ZNF200	zinc finger protein 200	570.455	3.05845e-12	ENSG00000010539
-0.679045	CD4	CD4 molecule	7.34214	0.33605	ENSG00000010610
-0.487676	LRRC23	leucine rich repeat containing 23	179.327	0.00021452	ENSG00000010626
0.637456	BTK	Bruton tyrosine kinase	3.06431	0.584299	ENSG00000010671
-0.89664	HFE	homeostatic iron regulator	238.467	2.45124e-13	ENSG00000010704
-0.433739	SCMH1	Scm polycomb group protein homolog 1	780.141	1.30281e-11	ENSG00000010803
2.82222	FYN	FYN proto-oncogene, Src family tyrosine kinase	31.0002	3.31587e-12	ENSG00000010810
1.62509	HIVEP2	human immunodeficiency virus type I enhancer binding protein 2	625.423	3.26109e-97	ENSG00000010818
-2.95429	FMO1	flavin containing monooxygenase 1	2.80901	0.0386534	ENSG00000010932
0.0135393	ELOA	elongin A	2456.78	0.783079	ENSG00000011007
-0.295222	LYPLA2	lysophospholipase II	651.375	3.55443e-05	ENSG00000011009
0.709237	CLCN6	chloride voltage-gated channel 6	827.04	3.89376e-28	ENSG00000011021
-0.982357	MRC2	mannose receptor C type 2	9072.01	2.03941e-297	ENSG00000011028
-0.246439	SLC6A7	solute carrier family 6 member 7	15.779	0.624108	ENSG00000011083
0.00809011	TSPAN9	tetraspanin 9	159.937	0.962653	ENSG00000011105
0.0945421	BTBD7	BTB domain containing 7	809.131	0.183697	ENSG00000011114
0.125913	APBA3	amyloid beta precursor protein binding family A member 3	211.272	0.345525	ENSG00000011132
0.311519	MKS1	Meckel syndrome, type 1	432.248	0.00065992	ENSG00000011143
1.62705	ABHD5	abhydrolase domain containing 5	918.63	4.05386e-141	ENSG00000011198
-0.106619	ANOS1	anosmin 1	103.271	0.587509	ENSG00000011201
1.41225	AKAP8L	A-kinase anchoring protein 8 like	2146.26	6.094e-239	ENSG00000011243
0.400102	MBTD1	mbt domain containing 1	816.593	1.95287e-10	ENSG00000011258
-0.0125671	UTP18	UTP18, small subunit processome component	2837.66	0.778944	ENSG00000011260
0.200707	RNF216	ring finger protein 216	2751.69	6.63089e-08	ENSG00000011275
0.0681451	TTC19	tetratricopeptide repeat domain 19	1624.64	0.209268	ENSG00000011295
0.223444	PTBP1	polypyrimidine tract binding protein 1	6916.04	1.07008e-15	ENSG00000011304
1.46907	DPF1	double PHD fingers 1	526.396	2.73946e-73	ENSG00000011332
1.96929	SYT7	synaptotagmin 7	7.70065	0.00671714	ENSG00000011347
0.366934	LARS2	leucyl-tRNA synthetase 2, mitochondrial	766.518	8.50576e-08	ENSG00000011376
0.487987	PIK3C2A	phosphatidylinositol-4-phosphate 3-kinase catalytic subunit type 2 alpha	2758.67	9.22479e-38	ENSG00000011405
1.59924	PLAUR	plasminogen activator, urokinase receptor	2326.95	0	ENSG00000011422
-0.597939	ANLN	anillin actin binding protein	9370.09	2.93589e-118	ENSG00000011426
0.347129	WIZ	widely interspaced zinc finger motifs	1369.28	6.48096e-12	ENSG00000011451
0.666175	GPR21	G protein-coupled receptor 21	2073.82	3.99183e-50	ENSG00000011454
0.666175	RABGAP1	RAB GTPase activating protein 1	2073.82	3.99183e-50	ENSG00000011454
-0.255439	DCN	decorin	682.666	0.000264523	ENSG00000011465
0.492407	QPCTL	glutaminyl-peptide cyclotransferase like	536.456	5.75269e-10	ENSG00000011478
0.102728	PPP5C	protein phosphatase 5 catalytic subunit	1321.83	0.0637301	ENSG00000011485
-0.430362	CEP68	centrosomal protein 68	474.07	3.23929e-07	ENSG00000011523
0.704652	MAP4K3	mitogen-activated protein kinase kinase kinase kinase 3	948.294	2.38344e-30	ENSG00000011566
-0.519146	ZBTB32	zinc finger and BTB domain containing 32	4.21129	0.613244	ENSG00000011590
0.875569	TMEM159	transmembrane protein 159	574.839	1.15157e-27	ENSG00000011638
0.140672	GABRA3	gamma-aminobutyric acid type A receptor alpha3 subunit	36.6787	0.67234	ENSG00000011677
0.0820015	BRCA1	BRCA1, DNA repair associated	2153.62	0.0619005	ENSG00000012048
0.144503	ERCC1	ERCC excision repair 1, endonuclease non-catalytic subunit	1789.02	0.00488163	ENSG00000012061
1.19227	CD22	CD22 molecule	73.3956	2.15243e-08	ENSG00000012124
-0.603974	MBTPS2	membrane bound transcription factor peptidase, site 2	1279.46	6.62835e-31	ENSG00000012174
-0.469331	PRICKLE3	prickle planar cell polarity protein 3	222.099	0.000123294	ENSG00000012211
2.16391	LTF	lactotransferrin	10.4494	0.000978773	ENSG00000012223
-1.04327	EXTL3	exostosin like glycosyltransferase 3	1107.51	5.88521e-75	ENSG00000012232
-0.928174	NR1H4	nuclear receptor subfamily 1 group H member 4	41.312	0.0010556	ENSG00000012504
-0.119373	ELOVL5	ELOVL fatty acid elongase 5	3129.09	0.00258624	ENSG00000012660
-0.0167784	CALCOCO1	calcium binding and coiled-coil domain 1	1036.75	0.810101	ENSG00000012822
-0.357188	UBR7	ubiquitin protein ligase E3 component n-recognin 7 (putative)	1448.39	1.62921e-12	ENSG00000012963
1.02741	MAP4K5	mitogen-activated protein kinase kinase kinase kinase 5	2415.41	7.5588e-120	ENSG00000012983
-1.17336	EHD3	EH domain containing 3	6247.66	2.92509e-257	ENSG00000013016
0.672085	PSMC4	proteasome 26S subunit, ATPase 4	4552.1	1.73797e-88	ENSG00000013275
-0.185774	MAN2B2	mannosidase alpha class 2B member 2	1516.08	0.00029467	ENSG00000013288
0.421962	SLC7A14	solute carrier family 7 member 14	1.6324	0.78955	ENSG00000013293
0.233392	CLDN11	claudin 11	3.81308	0.821333	ENSG00000013297
0.233392	LOC101928583	uncharacterized LOC101928583	3.81308	0.821333	ENSG00000013297
-0.386382	SLC25A39	solute carrier family 25 member 39	2000.65	9.90642e-17	ENSG00000013306
-0.644765	MVP	major vault protein	2106.22	1.06319e-54	ENSG00000013364
0.459088	NUB1	negative regulator of ubiquitin like proteins 1	3374.42	2.47896e-37	ENSG00000013374
0.203557	PGM3	phosphoglucomutase 3	872.288	0.00222134	ENSG00000013375
-0.612004	RWDD2A	RWD domain containing 2A	124.533	0.000172364	ENSG00000013392
1.16646	CLK1	CDC like kinase 1	3055.84	2.02728e-218	ENSG00000013441
-0.0375393	POLR3B	RNA polymerase III subunit B	439.723	0.701513	ENSG00000013503
-0.29051	ANGEL1	angel homolog 1	426.175	0.0010953	ENSG00000013523
-0.0678777	RNF14	ring finger protein 14	1659	0.177117	ENSG00000013561
-0.93309	DNASE1L1	deoxyribonuclease 1 like 1	242.798	4.93367e-16	ENSG00000013563
0.506346	DDX11	DEAD/H-box helicase 11	879.63	3.55827e-16	ENSG00000013573
-0.528708	HEBP1	heme binding protein 1	401.102	1.23914e-08	ENSG00000013583
3.39848	GPRC5A	G protein-coupled receptor class C group 5 member A	298.021	3.26282e-116	ENSG00000013588
-1.65102	MAMLD1	mastermind like domain containing 1	448.372	4.37697e-79	ENSG00000013619
-1.09723	TACC3	transforming acidic coiled-coil containing protein 3	2180.08	9.44403e-140	ENSG00000013810
-0.116538	UFL1	UFM1 specific ligase 1	635.576	0.121203	ENSG00000014123
0.00205466	POLA2	DNA polymerase alpha 2, accessory subunit	1038.17	0.977101	ENSG00000014138
1.65794	ZC3H3	zinc finger CCCH-type containing 3	1076.68	1.16224e-172	ENSG00000014164
-1.07509	CAPN1	calpain 1	1766.72	4.98201e-113	ENSG00000014216
0.706596	ACPP	acid phosphatase, prostate	6.42752	0.374736	ENSG00000014257
0.0113092	MDH1	malate dehydrogenase 1	3785.72	0.776003	ENSG00000014641
-0.0410001	SLC30A9	solute carrier family 30 member 9	1782.09	0.419816	ENSG00000014824
-0.620115	MTMR11	myotubularin related protein 11	266.742	1.83757e-08	ENSG00000014914
0.0890585	COX15	COX15, cytochrome c oxidase assembly homolog	899.178	0.166403	ENSG00000014919
0.134386	CCDC88C	coiled-coil domain containing 88C	14.9394	0.797745	ENSG00000015133
0.126076	YAF2	YY1 associated factor 2	377.118	0.193754	ENSG00000015153
0.0999383	ZMYND11	zinc finger MYND-type containing 11	1070.78	0.105639	ENSG00000015171
0.0506676	WAS	Wiskott-Aldrich syndrome	13.9474	0.927695	ENSG00000015285
-0.0440714	BID	BH3 interacting domain death agonist	335.525	0.692367	ENSG00000015475
-0.0361425	MATR3	matrin 3	8724.7	0.200721	ENSG00000015479
1.59846	NPC1L1	NPC1 like intracellular cholesterol transporter 1	5.00794	0.465042	ENSG00000015520
-0.606307	XYLT2	xylosyltransferase 2	731.155	1.86224e-17	ENSG00000015532
-0.290697	RGPD5	RANBP2-like and GRIP domain containing 5	14.9846	0.573057	ENSG00000015568
2.76244	STMN4	stathmin 4	14.9978	1.68318e-06	ENSG00000015592
-0.264403	NUDCD3	NudC domain containing 3	3187.96	8.56779e-13	ENSG00000015676
0.868483	ISL1	ISL LIM homeobox 1	2.4816	0.497628	ENSG00000016082
-2.03167	CHDH	choline dehydrogenase	3.24392	0.0957844	ENSG00000016391
-0.592853	GLT8D1	glycosyltransferase 8 domain containing 1	1511.86	1.9296e-32	ENSG00000016864
-0.1504	ATP2C1	ATPase secretory pathway Ca2+ transporting 1	2426.3	0.000143767	ENSG00000017260
0.709783	SLC38A5	solute carrier family 38 member 5	7.47629	0.340636	ENSG00000017483
-0.441548	RALBP1	ralA binding protein 1	2051.09	5.45258e-26	ENSG00000017797
0.202391	RUFY3	RUN and FYVE domain containing 3	889.42	0.00170972	ENSG00000018189
-1.31624	CNTN1	contactin 1	12.0095	0.0310969	ENSG00000018236
-0.711349	SLC11A1	solute carrier family 11 member 1	11.2851	0.21298	ENSG00000018280
-0.932816	WWTR1	WW domain containing transcription regulator 1	2398.85	5.60318e-125	ENSG00000018408
-0.183503	AGPS	alkylglycerone phosphate synthase	2544.58	2.43202e-06	ENSG00000018510
0.67025	CXorf56	chromosome X open reading frame 56	764.466	3.04255e-24	ENSG00000018610
2.12923	ATP1A2	ATPase Na+/K+ transporting subunit alpha 2	12.0911	0.000367137	ENSG00000018625
0.704658	TTC27	tetratricopeptide repeat domain 27	779.668	3.06143e-25	ENSG00000018699
1.54024	ZNF582	zinc finger protein 582	226.478	3.00868e-35	ENSG00000018869
-0.177327	VSIG2	V-set and immunoglobulin domain containing 2	5.3137	0.847542	ENSG00000019102
-0.902956	PHLDB1	pleckstrin homology like domain family B member 1	2560.29	8.79144e-99	ENSG00000019144
-3.90247	CYP24A1	cytochrome P450 family 24 subfamily A member 1	7.49907	0.000146353	ENSG00000019186
-0.184626	PRDM11	PR/SET domain 11	165.245	0.220392	ENSG00000019485
1.03961	SYT13	synaptotagmin 13	6.37124	0.188062	ENSG00000019505
0.727837	SNAI2	snail family transcriptional repressor 2	2192.67	5.71197e-54	ENSG00000019549
-0.525329	CD74	CD74 molecule	23.4167	0.173742	ENSG00000019582
-0.33589	HGF	hepatocyte growth factor	7.77384	0.644798	ENSG00000019991
1.02602	ZRANB1	zinc finger RANBP2-type containing 1	2156.49	3.42301e-133	ENSG00000019995
0.420389	NCDN	neurochondrin	992.402	1.56683e-10	ENSG00000020129
-0.703668	ADGRA2	adhesion G protein-coupled receptor A2	303.556	3.08162e-12	ENSG00000020181
-0.241662	ZFP64	ZFP64 zinc finger protein	338.485	0.0145263	ENSG00000020256
0.245548	MNAT1	MNAT1, CDK activating kinase assembly factor	769.375	0.000208378	ENSG00000020426
0.478725	SAMD4A	sterile alpha motif domain containing 4A	3155.64	2.14055e-28	ENSG00000020577
0.291702	RUNX3	runt related transcription factor 3	8.53274	0.669497	ENSG00000020633
0.404672	MRE11	MRE11 homolog, double strand break repair nuclease	899.032	8.90996e-11	ENSG00000020922
-0.869553	PLEKHB1	pleckstrin homology domain containing B1	238.855	1.17336e-13	ENSG00000021300
2.25197	SLC7A9	solute carrier family 7 member 9	12.0306	0.000210455	ENSG00000021488
-0.744174	SPAST	spastin	683.431	1.92238e-25	ENSG00000021574
0.017405	NRXN3	neurexin 3	366.667	0.875305	ENSG00000021645
-0.457774	OSBPL5	oxysterol binding protein like 5	241.022	6.94252e-05	ENSG00000021762
0.88373	AQR	aquarius intron-binding spliceosomal factor	2497.96	2.42296e-114	ENSG00000021776
-0.548175	CPS1	carbamoyl-phosphate synthase 1	866.857	3.03975e-18	ENSG00000021826
-0.894473	FHL1	four and a half LIM domains 1	431.514	1.37263e-25	ENSG00000022267
0.7709	RTF2	replication termination factor 2	4404.66	2.86132e-124	ENSG00000022277
-1.84236	GABRA1	gamma-aminobutyric acid type A receptor alpha1 subunit	2.8984	0.124444	ENSG00000022355
-0.665509	SLC45A4	solute carrier family 45 member 4	257.781	2.16944e-09	ENSG00000022567
0.825905	RNF10	ring finger protein 10	5833.53	6.72271e-183	ENSG00000022840
-0.191187	ZNF839	zinc finger protein 839	434.791	0.0354371	ENSG00000022976
0.226643	ZDHHC6	zinc finger DHHC-type containing 6	1147.89	4.61683e-05	ENSG00000023041
-0.111311	RNH1	ribonuclease/angiogenin inhibitor 1	2812.5	0.00585486	ENSG00000023191
0.267201	NDUFS1	NADH:ubiquinone oxidoreductase core subunit S1	1237.04	4.77277e-07	ENSG00000023228
0.426948	RB1CC1	RB1 inducible coiled-coil 1	3067.94	3.9251e-32	ENSG00000023287
0.374388	ERP44	endoplasmic reticulum protein 44	2091.8	3.63555e-19	ENSG00000023318
1.18812	ALAS1	5'-aminolevulinate synthase 1	1754.8	1.69282e-150	ENSG00000023330
0.690737	BIRC3	baculoviral IAP repeat containing 3	198.629	1.6077e-07	ENSG00000023445
-0.481591	AKAP11	A-kinase anchoring protein 11	2102.89	7.8544e-31	ENSG00000023516
1.0814	GLRX2	glutaredoxin 2	872.251	7.43918e-67	ENSG00000023572
1.12109	SNAPC1	small nuclear RNA activating complex polypeptide 1	10575.6	0	ENSG00000023608
-0.781655	DERA	deoxyribose-phosphate aldolase	654.009	2.31207e-29	ENSG00000023697
0.430512	STRAP	serine/threonine kinase receptor associated protein	6214.57	5.30585e-45	ENSG00000023734
1.48002	ABCC2	ATP binding cassette subfamily C member 2	13.1047	0.00641887	ENSG00000023839
-0.142532	DEF6	DEF6, guanine nucleotide exchange factor	83.352	0.523302	ENSG00000023892
0.852488	PLEKHO1	pleckstrin homology domain containing O1	118.583	2.03126e-07	ENSG00000023902
-0.45249	GCLM	glutamate-cysteine ligase modifier subunit	1703.47	2.5381e-23	ENSG00000023909
0.458727	UBR2	ubiquitin protein ligase E3 component n-recognin 2	1519.22	9.6382e-22	ENSG00000024048
-0.440254	EHD2	EH domain containing 2	3754.33	1.97185e-41	ENSG00000024422
-1.09574	DEPDC1	DEP domain containing 1	1501.66	4.88908e-115	ENSG00000024526
0.536279	CCDC28A	coiled-coil domain containing 28A	179.077	7.18307e-05	ENSG00000024862
1.24464	RRAGD	Ras related GTP binding D	1758.32	1.52477e-149	ENSG00000025039
0.485826	HSF2	heat shock transcription factor 2	640.876	8.53995e-12	ENSG00000025156
0.46538	PHF20	PHD finger protein 20	2353.67	2.77405e-32	ENSG00000025293
-1.16278	HSD17B6	hydroxysteroid 17-beta dehydrogenase 6	23.4817	0.00217893	ENSG00000025423
-0.22391	NR1H3	nuclear receptor subfamily 1 group H member 3	166.946	0.123491	ENSG00000025434
-0.839155	TYMP	thymidine phosphorylase	15.0123	0.0812545	ENSG00000025708
0.167645	NCAPH2	non-SMC condensin II complex subunit H2	624.559	0.0306406	ENSG00000025770
0.243121	TOMM34	translocase of outer mitochondrial membrane 34	1640.43	3.18453e-07	ENSG00000025772
-0.123419	SEC63	SEC63 homolog, protein translocation regulator	1422.66	0.0219715	ENSG00000025796
0.0169218	KPNA6	karyopherin subunit alpha 6	3106.36	0.679865	ENSG00000025800
-0.502725	VIM	vimentin	58284.4	2.1632e-119	ENSG00000026025
0.126292	FAS	Fas cell surface death receptor	71.1699	0.590018	ENSG00000026103
-0.73551	RNASET2	ribonuclease T2	189.006	4.49707e-07	ENSG00000026297
0.536456	CD44	CD44 molecule (Indian blood group)	11788.3	1.52981e-107	ENSG00000026508
2.19788	KCNG1	potassium voltage-gated channel modifier subfamily G member 1	98.7535	5.59385e-27	ENSG00000026559
0.0765725	AGPAT4	1-acylglycerol-3-phosphate O-acyltransferase 4	201.192	0.587909	ENSG00000026652
4.94651	SLAMF7	SLAM family member 7	1273.69	0	ENSG00000026751
-0.850461	BTN3A1	butyrophilin subfamily 3 member A1	110.321	8.5378e-07	ENSG00000026950
0.394631	MIPEP	mitochondrial intermediate peptidase	365.302	2.98761e-05	ENSG00000027001
0.381987	PRKCH	protein kinase C eta	58.6587	0.114287	ENSG00000027075
-0.398697	INSRR	insulin receptor related receptor	2.12904	0.782626	ENSG00000027644
0.643563	IFNGR1	interferon gamma receptor 1	492.964	3.0854e-15	ENSG00000027697
-0.808269	B4GALT7	beta-1,4-galactosyltransferase 7	528.719	1.61833e-25	ENSG00000027847
-2.87715	SH2D2A	SH2 domain containing 2A	3.9895	0.0124665	ENSG00000027869
0.0222822	VRK2	vaccinia related kinase 2	519.542	0.807887	ENSG00000028116
0.376576	TNFRSF1B	TNF receptor superfamily member 1B	7.15617	0.61732	ENSG00000028137
0.0828809	VEZT	vezatin, adherens junctions transmembrane protein	1477.91	0.115795	ENSG00000028203
0.219192	POU2F2	POU class 2 homeobox 2	12.8536	0.690636	ENSG00000028277
-0.627524	BRD9	bromodomain containing 9	723.586	1.89762e-21	ENSG00000028310
-0.0157111	SNX1	sorting nexin 1	3111.62	0.705182	ENSG00000028528
0.582535	TBPL1	TATA-box binding protein like 1	385.764	2.13384e-10	ENSG00000028839
-0.829476	ARNTL2	aryl hydrocarbon receptor nuclear translocator like 2	1758.45	3.69334e-71	ENSG00000029153
0.128709	BCLAF1	BCL2 associated transcription factor 1	2934.97	0.000928218	ENSG00000029363
0.315458	SLC39A9	solute carrier family 39 member 9	2461.52	3.08173e-15	ENSG00000029364
-0.530171	ANK1	ankyrin 1	11.8832	0.361397	ENSG00000029534
-0.602259	TFB1M	transcription factor B1, mitochondrial	161.251	1.53715e-05	ENSG00000029639
0.196369	RABEP1	rabaptin, RAB GTPase binding effector protein 1	1626.31	6.34149e-05	ENSG00000029725
-1.28996	HMGB3	high mobility group box 3	1139.02	5.62066e-119	ENSG00000029993
-0.0552267	NUP160	nucleoporin 160	1406.14	0.302887	ENSG00000030066
0.0597453	BAK1	BCL2 antagonist/killer 1	352.628	0.594148	ENSG00000030110
-1.51076	MUSK	muscle associated receptor tyrosine kinase	3.08809	0.194147	ENSG00000030304
-1.68875	IKZF2	IKAROS family zinc finger 2	166.394	2.44425e-31	ENSG00000030419
0.473556	GRN	granulin precursor	7486.11	7.32381e-71	ENSG00000030582
0.589111	FAM13B	family with sequence similarity 13 member B	2298.77	2.60403e-46	ENSG00000031003
-0.76807	ARHGAP31	Rho GTPase activating protein 31	991.721	1.12502e-39	ENSG00000031081
0.632426	CENPQ	centromere protein Q	799.642	1.92638e-22	ENSG00000031691
1.35337	SARS	seryl-tRNA synthetase	5294.53	0	ENSG00000031698
-0.117122	RANBP3	RAN binding protein 3	1294.72	0.0321975	ENSG00000031823
0.651133	ARID4A	AT-rich interaction domain 4A	844.798	1.05167e-24	ENSG00000032219
0.19242	EIPR1	EARP complex and GARP complex interacting protein 1	524.714	0.024846	ENSG00000032389
-0.119085	PNPLA6	patatin like phospholipase domain containing 6	905.614	0.0750351	ENSG00000032444
0.155954	IFT88	intraflagellar transport 88	258.853	0.211844	ENSG00000032742
0.0934418	ALG1	ALG1, chitobiosyldiphosphodolichol beta-mannosyltransferase	366.498	0.357256	ENSG00000033011
0.561338	ZCCHC8	zinc finger CCHC-type containing 8	1488.99	1.55831e-31	ENSG00000033030
0.171191	ABCF2	ATP binding cassette subfamily F member 2	3390.76	4.39282e-07	ENSG00000033050
-0.439818	CHPF2	chondroitin polymerizing factor 2	1836.15	2.78192e-20	ENSG00000033100
-0.316842	LRRC7	leucine rich repeat containing 7	94.4189	0.10129	ENSG00000033122
-0.929923	FUT8	fucosyltransferase 8	423.834	2.06631e-25	ENSG00000033170
0.225788	UBA6	ubiquitin like modifier activating enzyme 6	2573.4	8.89386e-09	ENSG00000033178
-0.172026	GAB2	GRB2 associated binding protein 2	605.931	0.0265522	ENSG00000033327
0.516643	ATP6V0A1	ATPase H+ transporting V0 subunit a1	1877.58	2.87174e-31	ENSG00000033627
0.487559	PIAS1	protein inhibitor of activated STAT 1	655.197	7.11491e-12	ENSG00000033800
0.476636	SLC4A7	solute carrier family 4 member 7	2694.25	5.27408e-30	ENSG00000033867
-0.00806358	APBA2	amyloid beta precursor protein binding family A member 2	318.061	0.94499	ENSG00000034053
1.20421	MAP2K3	mitogen-activated protein kinase kinase 3	1652.22	6.17369e-135	ENSG00000034152
-3.5386	EFCAB1	EF-hand calcium binding domain 1	4.01584	0.00639012	ENSG00000034239
0.153657	TMSB10	thymosin beta 10	14738.9	1.14475e-07	ENSG00000034510
-0.0275005	ASTE1	asteroid homolog 1	231.67	0.845115	ENSG00000034533
0.0811699	RNF19A	ring finger protein 19A, RBR E3 ubiquitin protein ligase	1273.99	0.13916	ENSG00000034677
1.00101	PEX3	peroxisomal biogenesis factor 3	390.294	3.1326e-24	ENSG00000034693
0.309828	GABARAPL2	GABA type A receptor associated protein like 2	2135.58	2.09667e-12	ENSG00000034713
0.333195	SH3YL1	SH3 and SYLF domain containing 1	532.556	2.34361e-05	ENSG00000035115
-0.782597	FAM136A	family with sequence similarity 136 member A	1212.35	4.7728e-46	ENSG00000035141
-0.323204	VCL	vinculin	2725.91	4.62039e-18	ENSG00000035403
-0.643787	DEPDC1B	DEP domain containing 1B	396.044	7.78163e-12	ENSG00000035499
-1.08111	DAPK2	death associated protein kinase 2	32.6003	0.00129328	ENSG00000035664
0.128748	NSMAF	neutral sphingomyelinase activation associated factor	1383.05	0.0112761	ENSG00000035681
0.10656	ADSS	adenylosuccinate synthase	1463.46	0.0697642	ENSG00000035687
-0.125051	TIMP2	TIMP metallopeptidase inhibitor 2	16397.4	1.74709e-07	ENSG00000035862
0.274892	RFC1	replication factor C subunit 1	2549.37	2.42721e-12	ENSG00000035928
0.916721	TBC1D23	TBC1 domain family member 23	1917.46	1.4388e-93	ENSG00000036054
0.275347	CUL3	cullin 3	1590.9	9.51296e-09	ENSG00000036257
-0.0404787	MYOM2	myomesin 2	166.838	0.797745	ENSG00000036448
0.72518	CYP46A1	cytochrome P450 family 46 subfamily A member 1	6.52348	0.353195	ENSG00000036530
0.429433	ZZZ3	zinc finger ZZ-type containing 3	2023.04	1.06641e-23	ENSG00000036549
-0.438277	USP2	ubiquitin specific peptidase 2	111.872	0.0120376	ENSG00000036672
-0.9476	TUBG2	tubulin gamma 2	373.99	1.74373e-24	ENSG00000037042
0.178573	RPL26L1	ribosomal protein L26 like 1	870.112	0.00552214	ENSG00000037241
-1.23309	FLT4	fms related tyrosine kinase 4	32.6785	0.000150819	ENSG00000037280
0.843758	NSUN2	NOP2/Sun RNA methyltransferase family member 2	3277.32	5.92875e-128	ENSG00000037474
0.0713335	FBXO42	F-box protein 42	891.916	0.332128	ENSG00000037637
0.660108	MFAP3	microfibril associated protein 3	1941.24	1.22786e-50	ENSG00000037749
-0.454642	MRI1	methylthioribose-1-phosphate isomerase 1	535.038	9.10311e-09	ENSG00000037757
0.0740373	METTL1	methyltransferase like 1	386.403	0.459857	ENSG00000037897
-0.339186	HOXC8	homeobox C8	47.0059	0.234397	ENSG00000037965
-0.129085	AGA	aspartylglucosaminidase	1157.36	0.0236986	ENSG00000038002
-0.847754	PI4K2B	phosphatidylinositol 4-kinase type 2 beta	735.092	1.79316e-35	ENSG00000038210
1.01605	BOD1L1	biorientation of chromosomes in cell division 1 like 1	2410.93	8.34151e-134	ENSG00000038219
-0.0938123	MAT2B	methionine adenosyltransferase 2B	1513.38	0.0641698	ENSG00000038274
-0.831362	TLL1	tolloid like 1	194.356	1.31195e-10	ENSG00000038295
0.164077	EDC4	enhancer of mRNA decapping 4	1487.43	0.00156087	ENSG00000038358
0.310906	TRIO	trio Rho guanine nucleotide exchange factor	4851.47	2.05237e-24	ENSG00000038382
-1.36625	VCAN	versican	483.681	2.08213e-60	ENSG00000038427
0.383941	CLEC16A	C-type lectin domain containing 16A	927.273	9.22589e-10	ENSG00000038532
0.746232	MSR1	macrophage scavenger receptor 1	3.30387	0.516269	ENSG00000038945
-4.76058	CDH1	cadherin 1	92.9626	7.7311e-42	ENSG00000039068
0.470743	MTREX	Mtr4 exosome RNA helicase	2174.27	1.73208e-27	ENSG00000039123
0.471967	DNAH5	dynein axonemal heavy chain 5	106.908	0.00674138	ENSG00000039139
1.50647	ZFYVE16	zinc finger FYVE-type containing 16	2463.35	3.96409e-262	ENSG00000039319
-0.659594	RIPOR1	RHO family interacting cell polarization regulator 1	1653.03	1.7279e-45	ENSG00000039523
-1.30399	RAI14	retinoic acid induced 14	4816.7	6.21625e-304	ENSG00000039560
2.34255	SOX30	SRY-box 30	3.18567	0.0609944	ENSG00000039600
-0.491305	PNKP	polynucleotide kinase 3'-phosphatase	449.736	9.02268e-09	ENSG00000039650
1.94676	BEST2	bestrophin 2	8.5305	0.00487442	ENSG00000039987
-0.262612	PHLPP2	PH domain and leucine rich repeat protein phosphatase 2	690.956	0.000163411	ENSG00000040199
-0.699038	SPDL1	spindle apparatus coiled-coil protein 1	2224.11	1.25878e-66	ENSG00000040275
-0.276278	STAU2	staufen double-stranded RNA binding protein 2	1082.62	1.67967e-06	ENSG00000040341
0.460682	PQLC2	PQ loop repeat containing 2	728.819	6.63786e-12	ENSG00000040487
0.87389	CTNS	cystinosin, lysosomal cystine transporter	421.969	5.51372e-23	ENSG00000040531
0.193739	RTN4R	reticulon 4 receptor	105.411	0.307054	ENSG00000040608
-1.11064	PHF23	PHD finger protein 23	433.219	9.95796e-37	ENSG00000040633
-1.90455	CDH10	cadherin 10	639.602	9.44385e-132	ENSG00000040731
-0.149549	INPP4A	inositol polyphosphate-4-phosphatase type I A	803.383	0.0219272	ENSG00000040933
2.04477	RAB27B	RAB27B, member RAS oncogene family	539.303	1.78921e-124	ENSG00000041353
-0.266593	PSMA4	proteasome subunit alpha 4	6231.58	3.77965e-22	ENSG00000041357
0.987481	MYO16	myosin XVI	11.9898	0.0719787	ENSG00000041515
0.895227	LSG1	large 60S subunit nuclear export GTPase 1	2285.93	2.74544e-99	ENSG00000041802
0.310431	PARP3	poly(ADP-ribose) polymerase family member 3	440.888	0.000399918	ENSG00000041880
1.05759	TNC	tenascin C	797.542	4.23804e-55	ENSG00000041982
-0.165619	THAP3	THAP domain containing 3	336.738	0.116009	ENSG00000041988
0.21502	RIPOR3	RIPOR family member 3	5.28645	0.807887	ENSG00000042062
-1.02245	TDP1	tyrosyl-DNA phosphodiesterase 1	427.269	8.17852e-32	ENSG00000042088
-0.628618	AIFM2	apoptosis inducing factor, mitochondria associated 2	596.113	4.28872e-17	ENSG00000042286
-0.112065	SPATA7	spermatogenesis associated 7	171.747	0.449369	ENSG00000042317
0.548854	MED17	mediator complex subunit 17	1028.34	3.81439e-20	ENSG00000042429
0.268374	RETSAT	retinol saturase	1344.32	1.55184e-07	ENSG00000042445
-1.25497	CAPG	capping actin protein, gelsolin like	4752.59	0	ENSG00000042493
-0.232812	AP2S1	adaptor related protein complex 2 sigma 1 subunit	2821.12	6.52047e-10	ENSG00000042753
0.437962	USH2A	usherin	19.2701	0.332896	ENSG00000042781
3.84034	TG	thyroglobulin	40.1467	3.43934e-18	ENSG00000042832
-0.155051	ADAM28	ADAM metallopeptidase domain 28	2.38103	0.91219	ENSG00000042980
0.567163	DCUN1D1	defective in cullin neddylation 1 domain containing 1	1283.41	2.13631e-27	ENSG00000043093
-1.02372	JADE2	jade family PHD finger 2	576.031	3.22922e-39	ENSG00000043143
-0.571719	ZIC2	Zic family member 2	34.6846	0.0679808	ENSG00000043355
0.500547	LCP2	lymphocyte cytosolic protein 2	3.80214	0.62636	ENSG00000043462
0.986957	TRIT1	tRNA isopentenyltransferase 1	873.323	7.85205e-58	ENSG00000043514
-0.662952	ADRB1	adrenoceptor beta 1	4.89457	0.461231	ENSG00000043591
-0.440139	CUL7	cullin 7	1484.15	4.70278e-20	ENSG00000044090
0.33584	CTNNA1	catenin alpha 1	11355.2	1.18172e-41	ENSG00000044115
-0.380537	PHKA2	phosphorylase kinase regulatory subunit alpha 2	493.85	3.41533e-06	ENSG00000044446
-0.334537	CNTLN	centlein	383.199	0.000428633	ENSG00000044459
-0.959109	EPHA3	EPH receptor A3	14.3398	0.0600534	ENSG00000044524
0.412433	HSPA5	heat shock protein family A (Hsp70) member 5	21596.3	3.15082e-80	ENSG00000044574
-0.451034	DSG2	desmoglein 2	5463.38	2.94471e-50	ENSG00000046604
-0.0745694	GEMIN8	gem nuclear organelle associated protein 8	161.794	0.643012	ENSG00000046647
0.128396	OFD1	OFD1, centriole and centriolar satellite protein	1184.46	0.024697	ENSG00000046651
-0.57711	GPM6B	glycoprotein M6B	72.9902	0.00801421	ENSG00000046653
1.96337	MAGEC2	MAGE family member C2	41.995	1.53612e-10	ENSG00000046774
0.672526	PREX2	phosphatidylinositol-3,4,5-trisphosphate dependent Rac exchange factor 2	1.81651	0.674189	ENSG00000046889
0.747137	WDR37	WD repeat domain 37	328.092	4.73151e-14	ENSG00000047056
0.27808	YTHDC2	YTH domain containing 2	1269.29	1.51399e-07	ENSG00000047188
-0.97831	CTPS2	CTP synthase 2	418.425	1.75829e-27	ENSG00000047230
0.830756	ATP6V1H	ATPase H+ transporting V1 subunit H	2393.19	1.03717e-91	ENSG00000047249
0.226873	POLR2B	RNA polymerase II subunit B	3802.01	1.31379e-11	ENSG00000047315
1.51623	FAM214A	family with sequence similarity 214 member A	1048.8	1.96489e-136	ENSG00000047346
0.754571	ARAP2	ArfGAP with RhoGAP domain, ankyrin repeat and PH domain 2	341.922	1.35621e-14	ENSG00000047365
0.414552	TPR	translocated promoter region, nuclear basket protein	5945.81	1.36003e-46	ENSG00000047410
0.412041	CP	ceruloplasmin	10.1049	0.510573	ENSG00000047457
0.719033	KIAA0556	KIAA0556	841.962	3.00464e-28	ENSG00000047578
-0.035852	DTNBP1	dystrobrevin binding protein 1	469.856	0.728503	ENSG00000047579
-6.11074e-05	XK	X-linked Kx blood group	90.283	0.999728	ENSG00000047597
1.2519	ANO2	anoctamin 2	42.5669	1.52977e-05	ENSG00000047617
0.960245	C12orf4	chromosome 12 open reading frame 4	754.801	4.85778e-41	ENSG00000047621
0.311088	SCML1	Scm polycomb group protein like 1	1342.44	5.22681e-10	ENSG00000047634
-0.614303	WWC3	WWC family member 3	981.287	1.61345e-23	ENSG00000047644
0.686188	ARHGAP6	Rho GTPase activating protein 6	1.82265	0.646686	ENSG00000047648
2.55118	FAM184B	family with sequence similarity 184 member B	9.62179	0.000327633	ENSG00000047662
-0.215087	MAP4	microtubule associated protein 4	8541.42	5.46172e-17	ENSG00000047849
0.717807	GOPC	golgi associated PDZ and coiled-coil motif containing	1636.51	3.82389e-54	ENSG00000047932
0.975043	ROS1	ROS proto-oncogene 1, receptor tyrosine kinase	62.5763	3.64618e-05	ENSG00000047936
-0.308257	USP28	ubiquitin specific peptidase 28	786.283	1.95155e-06	ENSG00000048028
2.2178	HDAC9	histone deacetylase 9	1970.62	0	ENSG00000048052
-0.465537	TSPAN17	tetraspanin 17	1512.62	8.93165e-21	ENSG00000048140
0.469828	NOP16	NOP16 nucleolar protein	754.551	7.08058e-13	ENSG00000048162
-0.284285	CC2D2A	coiled-coil and C2 domain containing 2A	251.058	0.0194223	ENSG00000048342
0.0853296	RRM2B	ribonucleotide reductase regulatory TP53 inducible subunit M2B	1209.47	0.130681	ENSG00000048392
0.703706	ZNF800	zinc finger protein 800	1062.73	7.78123e-36	ENSG00000048405
1.07971	TNFRSF17	TNF receptor superfamily member 17	1.63721	0.485922	ENSG00000048462
0.11409	SNX29	sorting nexin 29	422.539	0.234824	ENSG00000048471
-1.40356	LMO3	LIM domain only 3	734.19	1.00377e-77	ENSG00000048540
0.208312	MRPS10	mitochondrial ribosomal protein S10	1436.99	3.10152e-05	ENSG00000048544
0.769291	RSF1	remodeling and spacing factor 1	2247.83	8.03626e-66	ENSG00000048649
0.106444	VPS13D	vacuolar protein sorting 13 homolog D	1596.65	0.0308421	ENSG00000048707
-0.747388	CELF2	CUGBP Elav-like family member 2	1.74392	0.817218	ENSG00000048740
-0.607899	FAM120A	family with sequence similarity 120A	5682.14	8.28735e-90	ENSG00000048828
0.0246962	R3HDM1	R3H domain containing 1	1267.12	0.677219	ENSG00000048991
-1.4581	COL9A2	collagen type IX alpha 2 chain	31.2918	1.02139e-05	ENSG00000049089
2.37997	KITLG	KIT ligand	205.778	4.80515e-60	ENSG00000049130
0.194219	ERCC8	ERCC excision repair 8, CSA ubiquitin ligase complex subunit	402.237	0.0349892	ENSG00000049167
0.789715	ADAMTS6	ADAM metallopeptidase with thrombospondin type 1 motif 6	383.908	1.21398e-14	ENSG00000049192
-0.502024	H6PD	hexose-6-phosphate dehydrogenase/glucose 1-dehydrogenase	962.668	3.11146e-17	ENSG00000049239
0.108609	VAMP3	vesicle associated membrane protein 3	4303.9	0.000642481	ENSG00000049245
0.31436	PER3	period circadian regulator 3	457.873	0.00016889	ENSG00000049246
-1.56724	EPN3	epsin 3	10.0467	0.00984528	ENSG00000049283
-0.83822	LTBP1	latent transforming growth factor beta binding protein 1	1438.41	3.66108e-64	ENSG00000049323
0.18556	RCN1	reticulocalbin 1	1165.53	0.000719638	ENSG00000049449
0.18556	PAX6-AS1	PAX6 antisense RNA 1	1165.53	0.000719638	ENSG00000049449
1.07549	ELN	elastin	1.66815	0.499369	ENSG00000049540
0.0700249	RFC2	replication factor C subunit 2	1719.94	0.154514	ENSG00000049541
-0.113415	ARID1B	AT-rich interaction domain 1B	725.947	0.128479	ENSG00000049618
-0.766093	CLPTM1L	CLPTM1 like	5284.05	1.92746e-127	ENSG00000049656
1.99009	NEDD4L	neural precursor cell expressed, developmentally down-regulated 4-like, E3 ubiquitin protein ligase	1821.01	0	ENSG00000049759
-0.111509	FOXP3	forkhead box P3	8.07766	0.88771	ENSG00000049768
-0.446208	PPP1R3F	protein phosphatase 1 regulatory subunit 3F	152.811	0.00248208	ENSG00000049769
0.0277811	HEXB	hexosaminidase subunit beta	6489.91	0.362762	ENSG00000049860
0.3551	PTCD2	pentatricopeptide repeat domain 2	310.169	0.000550442	ENSG00000049883
-0.447919	JKAMP	JNK1/MAPK8 associated membrane protein	1224.76	2.09202e-17	ENSG00000050130
-0.691561	DKK3	dickkopf WNT signaling pathway inhibitor 3	17821	4.8088e-191	ENSG00000050165
-0.141747	ARHGEF5	Rho guanine nucleotide exchange factor 5	436.055	0.123198	ENSG00000050327
-0.565763	NFE2L3	nuclear factor, erythroid 2 like 3	276.526	1.33156e-07	ENSG00000050344
-0.024308	MCUR1	mitochondrial calcium uniporter regulator 1	1340.46	0.677271	ENSG00000050393
0.739216	LIMA1	LIM domain and actin binding 1	4270.16	2.68242e-110	ENSG00000050405
0.511278	LETMD1	LETM1 domain containing 1	918.188	4.91055e-16	ENSG00000050426
-0.624228	SLC4A8	solute carrier family 4 member 8	39.7079	0.0323398	ENSG00000050438
1.50689	PTGER3	prostaglandin E receptor 3	63.6655	2.63463e-10	ENSG00000050628
-0.302115	TNIP3	TNFAIP3 interacting protein 3	6.92495	0.692188	ENSG00000050730
-0.372258	MAPK9	mitogen-activated protein kinase 9	1567.96	1.01743e-12	ENSG00000050748
-0.38897	BCAR1	BCAR1, Cas family scaffold protein	1843.96	9.53216e-19	ENSG00000050820
0.346266	FAM160A2	family with sequence similarity 160 member A2	578.608	6.99912e-06	ENSG00000051009
0.839483	HERPUD1	homocysteine inducible ER protein with ubiquitin like domain 1	1760.12	3.02472e-66	ENSG00000051108
0.352122	HOMER3	homer scaffold protein 3	684.918	4.96378e-07	ENSG00000051128
-0.216529	RAD51	RAD51 recombinase	685.622	0.00412226	ENSG00000051180
0.403915	POLQ	DNA polymerase theta	1536.68	3.18984e-16	ENSG00000051341
-0.988447	PIK3CB	phosphatidylinositol-4,5-bisphosphate 3-kinase catalytic subunit beta	1020.14	4.30389e-59	ENSG00000051382
-0.351271	CYBA	cytochrome b-245 alpha chain	403.162	0.000343778	ENSG00000051523
0.105781	THOC3	THO complex 3	465.426	0.561613	ENSG00000051596
-0.556825	HEBP2	heme binding protein 2	233.203	2.94592e-06	ENSG00000051620
-0.603515	MPHOSPH9	M-phase phosphoprotein 9	912.21	7.90197e-24	ENSG00000051825
0.176594	PLEKHA5	pleckstrin homology domain containing A5	23.7572	0.664183	ENSG00000052126
4.27181	PRSS8	serine protease 8	1.85395	0.0112573	ENSG00000052344
0.487583	SIKE1	suppressor of IKBKE 1	2082.19	6.64788e-30	ENSG00000052723
2.23664	RRP12	ribosomal RNA processing 12 homolog	2542.52	0	ENSG00000052749
2.35929	FNIP2	folliculin interacting protein 2	1637.35	0	ENSG00000052795
-0.674262	MSMO1	methylsterol monooxygenase 1	1139.64	3.09633e-26	ENSG00000052802
1.04122	TTC17	tetratricopeptide repeat domain 17	2287.15	2.88603e-133	ENSG00000052841
0.0570563	ALX4	ALX homeobox 4	250.778	0.656693	ENSG00000052850
-0.454689	FSTL4	follistatin like 4	45.3578	0.107912	ENSG00000053108
0.439073	FOXN3	forkhead box N3	1086.3	5.88091e-14	ENSG00000053254
-0.633476	AKR7A2	aldo-keto reductase family 7 member A2	802.498	8.99425e-24	ENSG00000053371
0.712331	MRTO4	MRT4 homolog, ribosome maturation factor	2497.7	9.76048e-71	ENSG00000053372
-0.277589	NNAT	neuronatin	19.5759	0.533561	ENSG00000053438
-0.103586	USE1	unconventional SNARE in the ER 1	243.89	0.41385	ENSG00000053501
0.343964	MCF2L2	MCF.2 cell line derived transforming sequence-like 2	24.232	0.375997	ENSG00000053524
0.275139	NRIP2	nuclear receptor interacting protein 2	21.2692	0.518228	ENSG00000053702
-0.0358687	LAMA3	laminin subunit alpha 3	155.196	0.827088	ENSG00000053747
-0.328965	AP5M1	adaptor related protein complex 5 mu 1 subunit	758.501	1.79819e-06	ENSG00000053770
-0.139731	ANAPC4	anaphase promoting complex subunit 4	727.688	0.0432706	ENSG00000053900
0.21065	TRAPPC3	trafficking protein particle complex 3	1962.62	1.05107e-06	ENSG00000054116
-0.00910778	THRAP3	thyroid hormone receptor associated protein 3	3086.87	0.834507	ENSG00000054118
-0.609212	PHPT1	phosphohistidine phosphatase 1	1194.97	8.45424e-28	ENSG00000054148
-0.273525	ENTPD2	ectonucleoside triphosphate diphosphohydrolase 2	3.17758	0.813688	ENSG00000054179
-0.287627	LY75	lymphocyte antigen 75	64.2537	0.22126	ENSG00000054219
0.981868	ARID4B	AT-rich interaction domain 4B	2003.27	3.00974e-115	ENSG00000054267
-0.505542	OPN3	opsin 3	139.646	0.0011984	ENSG00000054277
-0.308445	SDCCAG8	serologically defined colon cancer antigen 8	500.716	0.000251486	ENSG00000054282
3.44629	PTPRN	protein tyrosine phosphatase, receptor type N	10.3898	1.8054e-05	ENSG00000054356
0.0042759	HHAT	hedgehog acyltransferase	560.868	0.962949	ENSG00000054392
0.172991	KIF1B	kinesin family member 1B	1355.89	0.00107808	ENSG00000054523
-0.603875	FOXC1	forkhead box C1	1037.38	3.3705e-25	ENSG00000054598
0.328102	TBC1D22A	TBC1 domain family member 22A	319.91	0.00135767	ENSG00000054611
-0.265788	SYNE2	spectrin repeat containing nuclear envelope protein 2	1207.75	1.41222e-06	ENSG00000054654
0.444258	PLEKHH1	pleckstrin homology, MyTH4 and FERM domain containing H1	61.6024	0.0593118	ENSG00000054690
-1.34951	ATP9A	ATPase phospholipid transporting 9A (putative)	6429.24	0	ENSG00000054793
0.584659	CHRDL2	chordin like 2	2.68216	0.654111	ENSG00000054938
-0.755577	FAM168A	family with sequence similarity 168 member A	3458.58	2.27059e-105	ENSG00000054965
0.771106	RELT	RELT, TNF receptor	721.027	4.33724e-26	ENSG00000054967
-1.01143	GALC	galactosylceramidase	1879.27	1.81719e-113	ENSG00000054983
1.01625	NOP58	NOP58 ribonucleoprotein	4571.87	1.02068e-214	ENSG00000055044
-0.0764701	SZRD1	SUZ RNA binding domain containing 1	3445.19	0.0331059	ENSG00000055070
-0.330893	KCNH2	potassium voltage-gated channel subfamily H member 2	2.76176	0.79639	ENSG00000055118
-0.105987	CUL1	cullin 1	3326.85	0.00257774	ENSG00000055130
-0.0876872	FAM114A2	family with sequence similarity 114 member A2	679.461	0.252891	ENSG00000055147
-0.799609	CYFIP2	cytoplasmic FMR1 interacting protein 2	683.774	1.3938e-31	ENSG00000055163
0.0884266	TAB2	TGF-beta activated kinase 1 (MAP3K7) binding protein 2	945.944	0.164639	ENSG00000055208
-0.186372	GINM1	glycoprotein integral membrane 1	896.361	0.00253148	ENSG00000055211
-0.225539	EIF2AK2	eukaryotic translation initiation factor 2 alpha kinase 2	2921.12	1.93272e-07	ENSG00000055332
2.20048	USP36	ubiquitin specific peptidase 36	7070	0	ENSG00000055483
0.394727	KMT2C	lysine methyltransferase 2C	2145.37	8.17045e-21	ENSG00000055609
0.117253	MCOLN3	mucolipin 3	570.816	0.139472	ENSG00000055732
-0.370254	CCDC85A	coiled-coil domain containing 85A	54.3187	0.143495	ENSG00000055813
0.364178	PUM2	pumilio RNA binding family member 2	3424.38	4.83575e-24	ENSG00000055917
-0.401082	MRPL43	mitochondrial ribosomal protein L43	1111.4	7.66319e-13	ENSG00000055950
0.278368	ITIH4	inter-alpha-trypsin inhibitor heavy chain family member 4	44.168	0.343304	ENSG00000055955
-0.16605	HPF1	histone PARylation factor 1	717.96	0.0198215	ENSG00000056050
-0.179718	ZFR	zinc finger RNA binding protein	5068.86	9.5042e-09	ENSG00000056097
1.85335	ZNF280C	zinc finger protein 280C	309.054	1.44297e-59	ENSG00000056277
2.01051	NPFFR2	neuropeptide FF receptor 2	354.649	2.83038e-82	ENSG00000056291
1.85125	PHF21B	PHD finger protein 21B	7.21147	0.0128479	ENSG00000056487
-0.647259	TRAF1	TNF receptor associated factor 1	276.171	2.25178e-09	ENSG00000056558
0.518694	RC3H2	ring finger and CCCH-type domains 2	2223.57	1.95838e-36	ENSG00000056586
-0.0711739	IL17RB	interleukin 17 receptor B	56.1838	0.792957	ENSG00000056736
0.326864	TRAF3IP2	TRAF3 interacting protein 2	330.956	0.00102599	ENSG00000056972
-1.6522	GYG2	glycogenin 2	200.654	3.58402e-35	ENSG00000056998
0.772681	DCBLD2	discoidin, CUB and LCCL domain containing 2	1659.89	2.91329e-60	ENSG00000057019
0.0680226	SOAT1	sterol O-acyltransferase 1	1194.55	0.230075	ENSG00000057252
-0.146294	PKP2	plakophilin 2	4329.25	2.53892e-06	ENSG00000057294
2.65974	MSH4	mutS homolog 4	30.7059	1.61424e-11	ENSG00000057468
0.327029	GDI2	GDP dissociation inhibitor 2	3856.23	4.73358e-23	ENSG00000057608
-0.152323	PRDM1	PR/SET domain 1	69.7016	0.515818	ENSG00000057657
0.0407198	ATG5	autophagy related 5	1213.37	0.502475	ENSG00000057663
1.09598	PITHD1	PITH domain containing 1	1753.18	3.37393e-103	ENSG00000057757
-1.06607	MTA3	metastasis associated 1 family member 3	867.352	7.8952e-64	ENSG00000057935
-1.27679	USP13	ubiquitin specific peptidase 13	782.711	1.38777e-79	ENSG00000058056
-0.0662332	ATP11B	ATPase phospholipid transporting 11B (putative)	2081.99	0.14871	ENSG00000058063
1.39521	LAMC2	laminin subunit gamma 2	203.08	5.61521e-25	ENSG00000058085
-0.957662	CDK14	cyclin dependent kinase 14	1281.09	1.83619e-71	ENSG00000058091
0.00102022	SEC61A1	Sec61 translocon alpha 1 subunit	9341.95	0.97301	ENSG00000058262
0.530891	PPP1R12A	protein phosphatase 1 regulatory subunit 12A	3229.41	8.99392e-53	ENSG00000058272
-0.0544456	RASGRF1	Ras protein specific guanine nucleotide releasing factor 1	9.27831	0.93486	ENSG00000058335
-0.0581647	CAMK2B	calcium/calmodulin dependent protein kinase II beta	10.2951	0.92843	ENSG00000058404
-0.378113	CROCC	ciliary rootlet coiled-coil, rootletin	255.469	0.00104707	ENSG00000058453
0.138825	POLR3E	RNA polymerase III subunit E	945.153	0.0292979	ENSG00000058600
0.138825	LOC101060521	DNA-directed RNA polymerase III subunit RPC5	945.153	0.0292979	ENSG00000058600
0.0328181	ATP2B4	ATPase plasma membrane Ca2+ transporting 4	3279.27	0.408665	ENSG00000058668
0.513891	ZC3H11A	zinc finger CCCH-type containing 11A	3710.99	9.00772e-54	ENSG00000058673
0.300164	RIOK2	RIO kinase 2	1323.53	3.07876e-08	ENSG00000058729
0.207404	YIPF1	Yip1 domain family member 1	533.213	0.00897989	ENSG00000058799
-0.246325	NDC1	NDC1 transmembrane nucleoporin	1661.33	8.93835e-08	ENSG00000058804
0.951944	DGKG	diacylglycerol kinase gamma	715.938	2.18049e-41	ENSG00000058866
-0.185702	FLYWCH1	FLYWCH-type zinc finger 1	653.433	0.0165986	ENSG00000059122
-0.691014	UNKL	unkempt family like zinc finger	701.889	4.86313e-22	ENSG00000059145
0.284205	TBXAS1	thromboxane A synthase 1	12.3925	0.624342	ENSG00000059377
-0.263531	PARP12	poly(ADP-ribose) polymerase family member 12	322.811	0.011603	ENSG00000059378
-0.428471	ALDH18A1	aldehyde dehydrogenase 18 family member A1	1922.99	6.00471e-24	ENSG00000059573
-0.916165	TARBP1	TAR (HIV-1) RNA binding protein 1	701.337	4.39755e-40	ENSG00000059588
-0.326599	GATB	glutamyl-tRNA amidotransferase subunit B	346.49	0.00150657	ENSG00000059691
2.98425	MXD1	MAX dimerization protein 1	833.683	2.05217e-289	ENSG00000059728
0.28253	CDK17	cyclin dependent kinase 17	651.312	0.000262546	ENSG00000059758
0.913449	DNAJC25	DnaJ heat shock protein family (Hsp40) member C25	762.771	1.56722e-44	ENSG00000059769
3.13151	SLC2A3	solute carrier family 2 member 3	57.8536	1.29335e-23	ENSG00000059804
-0.570698	PSD	pleckstrin and Sec7 domain containing	15.2505	0.236859	ENSG00000059915
0.865753	CTDP1	CTD phosphatase subunit 1	686.543	1.24471e-34	ENSG00000060069
0.737877	YBX3	Y-box binding protein 3	3363.65	6.67309e-105	ENSG00000060138
1.94045	STYK1	serine/threonine/tyrosine kinase 1	67.517	3.20755e-16	ENSG00000060140
0.0570382	WNK1	WNK lysine deficient protein kinase 1	3144.67	0.132546	ENSG00000060237
-0.124898	CCAR1	cell division cycle and apoptosis regulator 1	1949.76	0.00609339	ENSG00000060339
-0.443413	OGFR	opioid growth factor receptor	1399.78	4.90405e-19	ENSG00000060491
-0.441411	PIGV	phosphatidylinositol glycan anchor biosynthesis class V	417.452	6.36919e-07	ENSG00000060642
-0.70251	PTPRU	protein tyrosine phosphatase, receptor type U	649.676	1.30487e-23	ENSG00000060656
-0.119987	SNRNP40	small nuclear ribonucleoprotein U5 subunit 40	1279.28	0.0264695	ENSG00000060688
-0.52784	RIMBP2	RIMS binding protein 2	45.5479	0.0584744	ENSG00000060709
-0.735651	COL11A1	collagen type XI alpha 1 chain	18760.9	1.37561e-141	ENSG00000060718
-0.490704	QSER1	glutamine and serine rich 1	1657.1	2.44794e-25	ENSG00000060749
-0.913211	MPC1	mitochondrial pyruvate carrier 1	335.282	1.86684e-19	ENSG00000060762
-0.377764	ACAA1	acetyl-CoA acyltransferase 1	1483.4	9.39146e-15	ENSG00000060971
0.315052	BCAT1	branched chain amino acid transaminase 1	1998.95	6.65921e-13	ENSG00000060982
-0.974454	HDAC7	histone deacetylase 7	571.827	1.97939e-38	ENSG00000061273
0.0815681	LZTS1	leucine zipper tumor suppressor 1	127.365	0.646633	ENSG00000061337
-0.0795463	PRDM6	PR/SET domain 6	5.09788	0.931737	ENSG00000061455
0.679929	SPAG4	sperm associated antigen 4	33.5716	0.0345982	ENSG00000061656
0.120029	NCKAP1	NCK associated protein 1	9202.63	3.93725e-06	ENSG00000061676
0.156525	MRPS35	mitochondrial ribosomal protein S35	1641.64	0.00142814	ENSG00000061794
0.394462	GUCY1B1	guanylate cyclase 1 soluble subunit beta 1	35.5731	0.225793	ENSG00000061918
0.648976	SFSWAP	splicing factor SWAP	1471.92	3.20729e-41	ENSG00000061936
-0.458265	TNK2	tyrosine kinase non receptor 2	924.687	2.26961e-14	ENSG00000061938
0.438119	MON2	MON2 homolog, regulator of endosome-to-Golgi trafficking	1763.07	4.59073e-21	ENSG00000061987
0.693902	CDH3	cadherin 3	2.76618	0.577765	ENSG00000062038
0.100246	GPBP1	GC-rich promoter binding protein 1	2272.55	0.018726	ENSG00000062194
0.976489	DGAT2	diacylglycerol O-acyltransferase 2	20.289	0.0181522	ENSG00000062282
0.719831	ZNF112	zinc finger protein 112	663.488	6.78763e-25	ENSG00000062370
0.173228	CS	citrate synthase	3058.55	2.69515e-06	ENSG00000062485
-0.78641	LTK	leukocyte receptor tyrosine kinase	22.2466	0.0467172	ENSG00000062524
0.860901	MRPS24	mitochondrial ribosomal protein S24	129.402	6.11894e-08	ENSG00000062582
-0.305245	ELMO2	engulfment and cell motility 2	1268.07	1.08446e-08	ENSG00000062598
0.496651	WAPL	WAPL cohesin release factor	1478.01	6.50154e-23	ENSG00000062650
0.069894	VMP1	vacuole membrane protein 1	4119.13	0.0359357	ENSG00000062716
0.717184	APPBP2	amyloid beta precursor protein binding protein 2	2063.06	5.1694e-56	ENSG00000062725
-0.430196	POLD1	DNA polymerase delta 1, catalytic subunit	837.2	1.36687e-11	ENSG00000062822
-0.675172	SEZ6	seizure related 6 homolog	3.70501	0.518125	ENSG00000063015
0.378089	EIF4B	eukaryotic translation initiation factor 4B	6749.02	8.63625e-45	ENSG00000063046
-0.501997	SLC6A16	solute carrier family 6 member 16	12.4978	0.355832	ENSG00000063127
-0.0949536	BICRA	BRD4 interacting chromatin remodeling complex associated protein	275.426	0.424738	ENSG00000063169
-0.478017	SPHK2	sphingosine kinase 2	293.296	1.28174e-05	ENSG00000063176
0.484815	RPL18	ribosomal protein L18	13824	5.8637e-61	ENSG00000063177
-0.691237	CA11	carbonic anhydrase 11	391.433	1.51885e-14	ENSG00000063180
-0.532259	ISOC2	isochorismatase domain containing 2	667.793	1.963e-14	ENSG00000063241
0.665486	U2AF2	U2 small nuclear RNA auxiliary factor 2	4271.62	5.04564e-102	ENSG00000063244
0.0269012	EPN1	epsin 1	3480.78	0.496782	ENSG00000063245
0.325985	MED29	mediator complex subunit 29	2166.76	2.65816e-15	ENSG00000063322
-1.48543	AHRR	aryl-hydrocarbon receptor repressor	109.481	8.67533e-17	ENSG00000063438
0.995653	ZNF275	zinc finger protein 275	750.592	3.93045e-48	ENSG00000063587
0.995653	LOC105373378	uncharacterized LOC105373378	750.592	3.93045e-48	ENSG00000063587
-0.510785	MTMR1	myotubularin related protein 1	728.845	8.49916e-13	ENSG00000063601
-0.433938	GPC1	glypican 1	3997.81	3.26577e-41	ENSG00000063660
-0.156846	ADCK1	aarF domain containing kinase 1	118.291	0.400711	ENSG00000063761
-0.469618	HAGH	hydroxyacylglutathione hydrolase	1123.13	6.24838e-17	ENSG00000063854
0.263574	RNF4	ring finger protein 4	2152.13	1.02706e-10	ENSG00000063978
0.297941	CASP8	caspase 8	670.844	6.55102e-05	ENSG00000064012
-1.57953	LIMCH1	LIM and calponin homology domains 1	4044.15	0	ENSG00000064042
-0.0879694	INTS13	integrator complex subunit 13	909.302	0.169401	ENSG00000064102
-0.630364	TM7SF3	transmembrane 7 superfamily member 3	1227.03	6.15256e-29	ENSG00000064115
1.72739	DLX3	distal-less homeobox 3	4.54275	0.0700714	ENSG00000064195
-0.753288	SPA17	sperm autoantigenic protein 17	343.518	1.24811e-14	ENSG00000064199
-0.692609	WISP2	WNT1 inducible signaling pathway protein 2	135.131	1.23403e-05	ENSG00000064205
2.03922	ST3GAL6	ST3 beta-galactoside alpha-2,3-sialyltransferase 6	30.4088	8.24842e-08	ENSG00000064225
-0.147986	ATP2C2	ATPase secretory pathway Ca2+ transporting 2	9.96541	0.817978	ENSG00000064270
3.24706	NGFR	nerve growth factor receptor	104.409	2.81365e-42	ENSG00000064300
-0.977307	CDON	cell adhesion associated, oncogene regulated	2555.69	2.34024e-119	ENSG00000064309
1.39628	TAF2	TATA-box binding protein associated factor 2	2024.94	1.85923e-198	ENSG00000064313
0.924503	HIPK2	homeodomain interacting protein kinase 2	544.232	5.33422e-33	ENSG00000064393
0.399365	TNPO3	transportin 3	2615.16	2.46076e-25	ENSG00000064419
-0.452883	RFXANK	regulatory factor X associated ankyrin containing protein	725.837	8.41335e-10	ENSG00000064490
-0.220133	TMEM161A	transmembrane protein 161A	425.882	0.0175931	ENSG00000064545
-0.458105	LPAR2	lysophosphatidic acid receptor 2	150.692	0.00194636	ENSG00000064547
0.288044	CTSA	cathepsin A	3095.84	2.59643e-15	ENSG00000064601
-0.190149	SUGP2	SURP and G-patch domain containing 2	3257.21	1.01784e-07	ENSG00000064607
-0.285653	SLC12A2	solute carrier family 12 member 2	1716.4	5.72795e-09	ENSG00000064651
0.0907454	SNX24	sorting nexin 24	383.72	0.376031	ENSG00000064652
-1.62974	CNN2	calponin 2	2017.62	2.97544e-291	ENSG00000064666
-0.436464	ABCA7	ATP binding cassette subfamily A member 7	434.65	5.12794e-07	ENSG00000064687
0.738803	SNCAIP	synuclein alpha interacting protein	3.27901	0.500965	ENSG00000064692
1.16672	DDX20	DEAD-box helicase 20	1412.13	2.18345e-121	ENSG00000064703
0.226841	BTBD1	BTB domain containing 1	5083.52	1.20615e-12	ENSG00000064726
-0.20763	FAR2	fatty acyl-CoA reductase 2	100.28	0.277327	ENSG00000064763
-0.760601	BCAS1	breast carcinoma amplified sequence 1	5.05826	0.398028	ENSG00000064787
-0.505749	CHI3L2	chitinase 3 like 2	63.0075	0.0480196	ENSG00000064886
0.371013	SBNO2	strawberry notch homolog 2	1622.85	1.67684e-12	ENSG00000064932
0.143988	PMS1	PMS1 homolog 1, mismatch repair system component	759.506	0.0775489	ENSG00000064933
-1.00314	HMG20B	high mobility group 20B	1334.62	6.10379e-88	ENSG00000064961
-1.11332	CALCRL	calcitonin receptor like receptor	271.797	1.01749e-23	ENSG00000064989
0.0580872	TAF11	TATA-box binding protein associated factor 11	719.926	0.433629	ENSG00000064995
-0.133664	ANKS1A	ankyrin repeat and sterile alpha motif domain containing 1A	938.096	0.0333093	ENSG00000064999
0.29032	AP3D1	adaptor related protein complex 3 delta 1 subunit	5359.12	2.44621e-21	ENSG00000065000
-0.369651	ZNF76	zinc finger protein 76	322.511	0.000346281	ENSG00000065029
-0.733409	SLC9A3R2	SLC9A3 regulator 2	447.051	1.05532e-17	ENSG00000065054
-1.31292	NTHL1	nth like DNA glycosylase 1	203.866	3.46329e-23	ENSG00000065057
0.0767537	UHRF1BP1	UHRF1 binding protein 1	924.983	0.249146	ENSG00000065060
-0.236693	GNAI3	G protein subunit alpha i3	3433.39	9.84041e-12	ENSG00000065135
-0.0824785	IPO5	importin 5	5075.54	0.00952496	ENSG00000065150
0.255299	OAT	ornithine aminotransferase	3132.31	2.71578e-12	ENSG00000065154
0.818202	WDR3	WD repeat domain 3	2151.82	8.48988e-79	ENSG00000065183
0.772576	PKN2	protein kinase N2	2411.98	8.24805e-83	ENSG00000065243
-0.561316	WDR18	WD repeat domain 18	517.098	1.37058e-12	ENSG00000065268
-0.47654	TRAM2	translocation associated membrane protein 2	6860.73	1.95611e-60	ENSG00000065308
1.2102	GLP2R	glucagon like peptide 2 receptor	134.621	5.51788e-13	ENSG00000065325
0.0857784	MCM10	minichromosome maintenance 10 replication initiation factor	496.017	0.36182	ENSG00000065328
-1.23137	DGKA	diacylglycerol kinase alpha	641.661	7.52615e-66	ENSG00000065357
-0.240006	ERBB3	erb-b2 receptor tyrosine kinase 3	22.7822	0.581394	ENSG00000065361
1.14087	ROPN1	rhophilin associated tail protein 1	29.683	0.000883672	ENSG00000065371
-0.906567	ANKRD44	ankyrin repeat domain 44	224.768	2.16106e-14	ENSG00000065413
0.767993	KARS	lysyl-tRNA synthetase	4495.29	4.41256e-133	ENSG00000065427
-0.624389	ADAT1	adenosine deaminase, tRNA specific 1	604.203	1.63921e-17	ENSG00000065457
-0.608196	PDIA5	protein disulfide isomerase family A member 5	242.351	1.28424e-07	ENSG00000065485
1.2413	TBC1D22B	TBC1 domain family member 22B	746.574	1.08789e-75	ENSG00000065491
-0.188961	NDUFB4	NADH:ubiquinone oxidoreductase subunit B4	2023.46	1.42652e-05	ENSG00000065518
0.00857003	SPEN	spen family transcriptional repressor	1642.87	0.881316	ENSG00000065526
0.167585	MYLK	myosin light chain kinase	476.542	0.0573693	ENSG00000065534
0.726682	ZC3H15	zinc finger CCCH-type containing 15	3745.99	2.64353e-103	ENSG00000065548
0.114083	MAP2K4	mitogen-activated protein kinase kinase 4	688.283	0.118587	ENSG00000065559
0.147422	TMEM206	transmembrane protein 206	527.908	0.0732232	ENSG00000065600
-1.97269	SNAP91	synaptosome associated protein 91	29.3583	3.97886e-08	ENSG00000065609
0.336844	SLK	STE20 like kinase	2751.55	1.38055e-19	ENSG00000065613
0.218555	CYB5R4	cytochrome b5 reductase 4	618.959	0.00388893	ENSG00000065615
5.34619	COL17A1	collagen type XVII alpha 1 chain	87.3975	6.9523e-33	ENSG00000065618
0.364977	GSTO2	glutathione S-transferase omega 2	213.203	0.00491172	ENSG00000065621
0.890968	SEC61A2	Sec61 translocon alpha 2 subunit	423.737	1.54122e-21	ENSG00000065665
-0.497921	TLE2	transducin like enhancer of split 2	413.241	1.70499e-08	ENSG00000065717
-0.485545	ASB1	ankyrin repeat and SOCS box containing 1	528.904	3.42741e-10	ENSG00000065802
3.33755	FAM107B	family with sequence similarity 107 member B	149.621	1.55782e-59	ENSG00000065809
-0.689855	ME1	malic enzyme 1	530.638	1.30567e-17	ENSG00000065833
-0.891495	TBC1D1	TBC1 domain family member 1	716.681	7.61624e-37	ENSG00000065882
0.434853	CDK13	cyclin dependent kinase 13	2227.55	1.19083e-25	ENSG00000065883
1.01414	MTHFD2	methylenetetrahydrofolate dehydrogenase (NADP+ dependent) 2, methenyltetrahydrofolate cyclohydrolase	4428.66	3.12401e-208	ENSG00000065911
1.44368	SLC9A7	solute carrier family 9 member A7	4.54407	0.118163	ENSG00000065923
0.152116	FOXJ2	forkhead box J2	566.825	0.0533099	ENSG00000065970
0.243604	YBX1	Y-box binding protein 1	20602.4	9.24259e-25	ENSG00000065978
-1.24056	PDE4A	phosphodiesterase 4A	522.058	1.80831e-54	ENSG00000065989
0.543207	PPP2R5A	protein phosphatase 2 regulatory subunit B'alpha	598.161	2.24775e-13	ENSG00000066027
-0.0733685	ELAVL1	ELAV like RNA binding protein 1	2801.6	0.0608046	ENSG00000066044
0.778711	DIP2B	disco interacting protein 2 homolog B	1305.45	9.3458e-48	ENSG00000066084
-0.326853	SMARCD1	SWI/SNF related, matrix associated, actin dependent regulator of chromatin, subfamily d, member 1	1549.78	2.16322e-12	ENSG00000066117
0.48988	KDM4A	lysine demethylase 4A	966.664	1.12434e-15	ENSG00000066135
0.354856	NFYC	nuclear transcription factor Y subunit gamma	773.901	9.26074e-08	ENSG00000066136
-0.465792	ZMYND12	zinc finger MYND-type containing 12	22.1323	0.263222	ENSG00000066185
-0.547835	SLC9A3	solute carrier family 9 member A3	191.856	2.51347e-05	ENSG00000066230
-0.396514	NGEF	neuronal guanine nucleotide exchange factor	136.578	0.0117383	ENSG00000066248
-1.07566	ASPM	abnormal spindle microtubule assembly	2895.63	1.72706e-181	ENSG00000066279
-0.455942	ELOVL1	ELOVL fatty acid elongase 1	1846.71	7.63335e-26	ENSG00000066322
-0.36871	SPI1	Spi-1 proto-oncogene	2.45161	0.77884	ENSG00000066336
-0.465206	ZNRD1	zinc ribbon domain containing 1	72.8895	0.0309838	ENSG00000066379
-1.21593	CLDN18	claudin 18	5.7269	0.134604	ENSG00000066405
1.11116	ZBTB11	zinc finger and BTB domain containing 11	1871.04	2.55154e-129	ENSG00000066422
0.745388	ATXN3	ataxin 3	447.726	1.50594e-18	ENSG00000066427
0.0883427	GOLGA5	golgin A5	1501.42	0.108608	ENSG00000066455
-0.67022	FGFR2	fibroblast growth factor receptor 2	212.34	3.163e-08	ENSG00000066468
0.738953	LRRC40	leucine rich repeat containing 40	1359.71	1.84287e-49	ENSG00000066557
-0.298124	ISOC1	isochorismatase domain containing 1	488.375	0.000259213	ENSG00000066583
-0.204352	EML1	echinoderm microtubule associated protein like 1	395.185	0.0322862	ENSG00000066629
0.125158	TRMT11	tRNA methyltransferase 11 homolog	353.411	0.214108	ENSG00000066651
0.64121	THUMPD1	THUMP domain containing 1	1946.96	6.04762e-52	ENSG00000066654
0.251405	MSANTD3	Myb/SANT DNA binding domain containing 3	2238.63	1.43644e-09	ENSG00000066697
2.40264	KIF26A	kinesin family member 26A	162.734	1.16109e-49	ENSG00000066735
0.998548	ATG2B	autophagy related 2B	1479.55	5.97695e-90	ENSG00000066739
0.331122	ARFGEF1	ADP ribosylation factor guanine nucleotide exchange factor 1	1840.73	5.50965e-14	ENSG00000066777
0.581072	ZFAT	zinc finger and AT-hook domain containing	129.579	0.000341524	ENSG00000066827
0.353449	MTFR1	mitochondrial fission regulator 1	858.261	2.95244e-08	ENSG00000066855
-0.674112	STAG3	stromal antigen 3	107.711	9.99831e-05	ENSG00000066923
-0.606294	FECH	ferrochelatase	714.271	2.92316e-19	ENSG00000066926
-0.0687604	MYO9A	myosin IXA	1472.6	0.201991	ENSG00000066933
-0.451852	DDX3Y	DEAD-box helicase 3, Y-linked	1.79735	0.770651	ENSG00000067048
0.615406	PFKP	phosphofructokinase, platelet	2461.28	1.50932e-52	ENSG00000067057
-0.452974	IDI1	isopentenyl-diphosphate delta isomerase 1	1145.51	4.8346e-16	ENSG00000067064
0.691237	SP100	SP100 nuclear antigen	1107.11	3.11827e-36	ENSG00000067066
0.207058	KLF6	Kruppel like factor 6	4008.59	0.00910141	ENSG00000067082
-0.287623	PLPP1	phospholipid phosphatase 1	203.361	0.0317574	ENSG00000067113
-0.155331	NEO1	neogenin 1	768.464	0.0199908	ENSG00000067141
-0.278722	TRAM1	translocation associated membrane protein 1	3382.23	7.97811e-12	ENSG00000067167
0.0786877	PHKA1	phosphorylase kinase regulatory subunit alpha 1	449.861	0.409591	ENSG00000067177
-0.599234	TNFRSF1A	TNF receptor superfamily member 1A	1393.44	2.24137e-33	ENSG00000067182
0.156363	CACNB1	calcium voltage-gated channel auxiliary subunit beta 1	234.406	0.225762	ENSG00000067191
-0.969322	EVI5	ecotropic viral integration site 5	401.179	8.76519e-28	ENSG00000067208
-0.82441	STOML1	stomatin like 1	302.163	1.95272e-15	ENSG00000067221
0.142096	PKM	pyruvate kinase M1/2	41414.7	2.73524e-11	ENSG00000067225
0.504109	DHX29	DExH-box helicase 29	2603.57	1.28805e-39	ENSG00000067248
0.695052	DNTTIP2	deoxynucleotidyltransferase terminal interacting protein 2	3753.36	2.88933e-90	ENSG00000067334
0.790707	METTL22	methyltransferase like 22	392.145	4.57823e-16	ENSG00000067365
0.700019	TP53BP1	tumor protein p53 binding protein 1	2551.81	1.26725e-74	ENSG00000067369
-1.26117	TRO	trophinin	318.323	1.88929e-35	ENSG00000067445
1.23763	RRP15	ribosomal RNA processing 15 homolog	2452.54	1.46863e-210	ENSG00000067533
-0.409887	RHOA	ras homolog family member A	14077.3	1.92666e-69	ENSG00000067560
0.504339	DHX8	DEAH-box helicase 8	1784.25	2.62587e-27	ENSG00000067596
0.190093	PRKCZ	protein kinase C zeta	363.437	0.0560948	ENSG00000067606
-0.807594	IARS2	isoleucyl-tRNA synthetase 2, mitochondrial	3298.77	9.37387e-112	ENSG00000067704
1.80256	SYT1	synaptotagmin 1	233.084	9.18772e-46	ENSG00000067715
0.0382346	NAV3	neuron navigator 3	539.314	0.665703	ENSG00000067798
-0.43093	IDH3G	isocitrate dehydrogenase 3 (NAD(+)) gamma	620.191	1.85857e-09	ENSG00000067829
-1.2019	ROGDI	rogdi homolog	194.642	8.38648e-21	ENSG00000067836
0.513199	PDZD4	PDZ domain containing 4	197.865	7.91035e-05	ENSG00000067840
-0.86089	ROCK1	Rho associated coiled-coil containing protein kinase 1	4031.57	9.30328e-153	ENSG00000067900
-0.504919	CBFB	core-binding factor beta subunit	2080.09	5.34554e-28	ENSG00000067955
0.0196334	PDK3	pyruvate dehydrogenase kinase 3	144.226	0.909225	ENSG00000067992
-1.56659	HYAL2	hyaluronoglucosaminidase 2	669.457	3.09251e-98	ENSG00000068001
-0.312753	HDAC4	histone deacetylase 4	176.845	0.0290053	ENSG00000068024
1.10398	RASSF1	Ras association domain family member 1	1241.72	4.95245e-90	ENSG00000068028
-0.536148	FGFR3	fibroblast growth factor receptor 3	856.055	1.6008e-14	ENSG00000068078
-0.237861	IFI35	interferon induced protein 35	354.188	0.0134864	ENSG00000068079
0.528995	HEATR6	HEAT repeat containing 6	837.534	3.05383e-17	ENSG00000068097
-0.164522	COASY	Coenzyme A synthase	1434.6	0.00217428	ENSG00000068120
-0.955408	PLEKHH3	pleckstrin homology, MyTH4 and FERM domain containing H3	482.489	6.67803e-30	ENSG00000068137
0.47582	MEF2A	myocyte enhancer factor 2A	2003.29	7.74572e-28	ENSG00000068305
0.67154	OTUD5	OTU deubiquitinase 5	1364.58	2.72046e-40	ENSG00000068308
0.543762	TFE3	transcription factor binding to IGHM enhancer 3	2274.09	1.41752e-41	ENSG00000068323
-0.873618	TBC1D25	TBC1 domain family member 25	440.941	4.51494e-24	ENSG00000068354
-0.324177	ACSL4	acyl-CoA synthetase long chain family member 4	1672.14	2.23616e-12	ENSG00000068366
-0.593004	INPP5A	inositol polyphosphate-5-phosphatase A	555.963	3.11518e-14	ENSG00000068383
0.28682	GPKOW	G-patch domain and KOW motifs	607.809	0.000130987	ENSG00000068394
-0.0247798	GRIPAP1	GRIP1 associated protein 1	1068.12	0.708693	ENSG00000068400
-0.268231	FTSJ1	FtsJ RNA methyltransferase homolog 1	2624.58	3.58809e-12	ENSG00000068438
-1.6469	PRR11	proline rich 11	972.344	4.24581e-151	ENSG00000068489
-1.12051	REEP1	receptor accessory protein 1	412.083	3.43446e-32	ENSG00000068615
0.298724	ATP11A	ATPase phospholipid transporting 11A	595.902	8.99252e-05	ENSG00000068650
0.622057	POLR1A	RNA polymerase I subunit A	1835.49	3.08502e-44	ENSG00000068654
-0.452432	LAPTM4A	lysosomal protein transmembrane 4 alpha	5702.13	3.39573e-52	ENSG00000068697
-0.152982	TTC7A	tetratricopeptide repeat domain 7A	793.016	0.0232447	ENSG00000068724
0.723721	IP6K2	inositol hexakisphosphate kinase 2	2244.97	1.20488e-72	ENSG00000068745
0.752739	STON1-GTF2A1L	STON1-GTF2A1L readthrough	13.6622	0.15485	ENSG00000068781
0.851535	SRBD1	S1 RNA binding domain 1	652.099	7.51932e-33	ENSG00000068784
-0.156195	KIF2A	kinesin family member 2A	1112.79	0.00804589	ENSG00000068796
-1.39811	RASGRP2	RAS guanyl releasing protein 2	3.407	0.206227	ENSG00000068831
1.02727	PSME4	proteasome activator subunit 4	2933.69	3.69938e-144	ENSG00000068878
-0.0797952	IFT80	intraflagellar transport 80	1235.34	0.158696	ENSG00000068885
0.441725	SIRT2	sirtuin 2	2733.16	5.44879e-25	ENSG00000068903
-0.295509	ERLEC1	endoplasmic reticulum lectin 1	2271.01	6.34145e-13	ENSG00000068912
0.294007	PPP2R5B	protein phosphatase 2 regulatory subunit B'beta	775.125	1.18465e-05	ENSG00000068971
3.45583	PYGM	glycogen phosphorylase, muscle associated	29.3044	4.0742e-13	ENSG00000068976
1.55297	PAGE1	PAGE family member 1	6.16131	0.0521323	ENSG00000068985
2.42308	PITX1	paired like homeodomain 1	4.40891	0.0200392	ENSG00000069011
0.448654	MAST4	microtubule associated serine/threonine kinase family member 4	587.905	2.08072e-09	ENSG00000069020
1.95313	ADGRF5	adhesion G protein-coupled receptor F5	7.57022	0.0109086	ENSG00000069122
0.731663	SDK2	sidekick cell adhesion molecule 2	2.83173	0.539336	ENSG00000069188
0.404159	NUP133	nucleoporin 133	1479.83	3.73874e-17	ENSG00000069248
-0.625372	NUCKS1	nuclear casein kinase and cyclin dependent kinase substrate 1	6135.12	3.44874e-88	ENSG00000069275
0.432522	VPS35	VPS35, retromer complex component	5034.28	2.3885e-49	ENSG00000069329
0.680524	DNAJA2	DnaJ heat shock protein family (Hsp40) member A2	2391.78	4.56068e-65	ENSG00000069345
-0.284883	BCL3	B cell CLL/lymphoma 3	439.577	0.00166612	ENSG00000069399
0.0255264	KCNAB2	potassium voltage-gated channel subfamily A regulatory beta subunit 2	382.27	0.812824	ENSG00000069424
1.72324	ABCC9	ATP binding cassette subfamily C member 9	75.3438	2.0034e-14	ENSG00000069431
-0.259551	GAL	galanin and GMAP prepropeptide	4.50117	0.791802	ENSG00000069482
-0.209998	CLEC2D	C-type lectin domain family 2 member D	59.1909	0.425932	ENSG00000069493
0.160272	FUNDC1	FUN14 domain containing 1	546.437	0.0547568	ENSG00000069509
1.25892	RORA	RAR related orphan receptor A	958.158	2.82076e-95	ENSG00000069667
1.16782	DRD4	dopamine receptor D4	11.2937	0.040118	ENSG00000069696
-0.751933	TGFBR3	transforming growth factor beta receptor 3	1545.54	3.62963e-55	ENSG00000069702
-0.901386	KIAA1107	KIAA1107	126.835	1.30965e-08	ENSG00000069712
1.37225	PLA2G10	phospholipase A2 group X	4.30147	0.161922	ENSG00000069764
0.455747	ATP1B3	ATPase Na+/K+ transporting subunit beta 3	3654.98	1.14339e-42	ENSG00000069849
1.04757	NEDD4	neural precursor cell expressed, developmentally down-regulated 4, E3 ubiquitin protein ligase	1471.12	1.00833e-91	ENSG00000069869
0.113751	PIGB	phosphatidylinositol glycan anchor biosynthesis class B	302.363	0.350706	ENSG00000069943
0.565024	MAPK6	mitogen-activated protein kinase 6	3943.76	3.41053e-64	ENSG00000069956
-0.185415	GNB5	G protein subunit beta 5	1212.62	0.000508139	ENSG00000069966
-0.549866	RAB27A	RAB27A, member RAS oncogene family	756.259	7.3841e-17	ENSG00000069974
0.053514	HDHD5	haloacid dehalogenase like hydrolase domain containing 5	377.128	0.610693	ENSG00000069998
0.00550553	UFD1	ubiquitin recognition factor in ER associated degradation 1	1159.61	0.931641	ENSG00000070010
0.482617	LRP6	LDL receptor related protein 6	483.071	1.12453e-08	ENSG00000070018
1.04659	SCT	secretin	5.37694	0.21573	ENSG00000070031
0.244656	PHRF1	PHD and ring finger domains 1	1676.97	8.93206e-08	ENSG00000070047
-0.343632	ELP1	elongator complex protein 1	2026.93	3.37415e-16	ENSG00000070061
-0.749557	NUCB2	nucleobindin 2	1486.02	6.98889e-50	ENSG00000070081
-0.83981	PFN2	profilin 2	4311.02	7.18195e-147	ENSG00000070087
-0.939568	PTPN3	protein tyrosine phosphatase, non-receptor type 3	555.68	7.57224e-34	ENSG00000070159
0.0503601	SPTB	spectrin beta, erythrocytic	291.496	0.677353	ENSG00000070182
1.16068	DAPP1	dual adaptor of phosphotyrosine and 3-phosphoinositides 1	6.20755	0.148713	ENSG00000070190
1.90697	FGF10	fibroblast growth factor 10	10.8068	0.00163525	ENSG00000070193
-0.948121	SLC44A1	solute carrier family 44 member 1	4383.33	4.79005e-188	ENSG00000070214
1.21637	TMEM260	transmembrane protein 260	669.257	3.89967e-63	ENSG00000070269
0.356155	SMG6	SMG6, nonsense mediated mRNA decay factor	500.067	1.13928e-05	ENSG00000070366
0.121233	EXOC5	exocyst complex component 5	1803.49	0.0135056	ENSG00000070367
0.256604	CLTCL1	clathrin heavy chain like 1	241.476	0.0317904	ENSG00000070371
-1.90624	FGF22	fibroblast growth factor 22	2.20508	0.168882	ENSG00000070388
0.120285	FSTL3	follistatin like 3	3063.92	0.00107402	ENSG00000070404
0.107054	DGCR2	DiGeorge syndrome critical region gene 2	1059.98	0.087941	ENSG00000070413
0.262267	RNF126	ring finger protein 126	836.175	3.04282e-05	ENSG00000070423
-0.331288	MNT	MAX network transcriptional repressor	326.871	0.000930222	ENSG00000070444
0.356459	ZXDC	ZXD family zinc finger C	529.021	8.25645e-06	ENSG00000070476
0.837019	JMJD6	arginine demethylase and lysine hydroxylase	1478.69	6.27572e-67	ENSG00000070495
0.775453	POLB	DNA polymerase beta	617.243	1.45641e-26	ENSG00000070501
0.0658957	WIPI1	WD repeat domain, phosphoinositide interacting 1	756.045	0.358974	ENSG00000070540
-2.95824	FRMPD1	FERM and PDZ domain containing 1	16.575	9.19465e-08	ENSG00000070601
0.199792	GBA2	glucosylceramidase beta 2	587.547	0.0116206	ENSG00000070610
0.061751	NDST1	N-deacetylase and N-sulfotransferase 1	2270.96	0.166268	ENSG00000070614
1.06797	ASNS	asparagine synthetase (glutamine-hydrolyzing)	2084.24	2.89001e-143	ENSG00000070669
-0.292217	AP3M2	adaptor related protein complex 3 mu 2 subunit	681.019	0.000108874	ENSG00000070718
-0.935778	ST6GALNAC2	ST6 N-acetylgalactosaminide alpha-2,6-sialyltransferase 2	130.814	2.78499e-09	ENSG00000070731
0.448616	PABPC1	poly(A) binding protein cytoplasmic 1	27521.1	1.83539e-93	ENSG00000070756
1.29017	TESK2	testis associated actin remodelling kinase 2	131.851	1.23884e-15	ENSG00000070759
0.782617	CFAP20	cilia and flagella associated protein 20	1338.98	4.259e-51	ENSG00000070761
0.606213	CSNK2A2	casein kinase 2 alpha 2	2881.63	3.78733e-50	ENSG00000070770
-0.314517	PTPN21	protein tyrosine phosphatase, non-receptor type 21	1149.44	6.80095e-09	ENSG00000070778
-0.241909	EIF2B3	eukaryotic translation initiation factor 2B subunit gamma	782.695	0.000405535	ENSG00000070785
-0.227241	CAMK2A	calcium/calmodulin dependent protein kinase II alpha	7.1797	0.766569	ENSG00000070808
0.207635	TCOF1	treacle ribosome biogenesis factor 1	2189.04	5.89567e-07	ENSG00000070814
-0.289824	CDC42	cell division cycle 42	5457.07	3.85577e-22	ENSG00000070831
0.835316	OSBPL3	oxysterol binding protein like 3	1665.89	4.5367e-68	ENSG00000070882
0.381219	RAD18	RAD18, E3 ubiquitin protein ligase	1966.99	1.73274e-18	ENSG00000070950
1.10163	ATP2B1	ATPase plasma membrane Ca2+ transporting 1	2655.84	7.57677e-161	ENSG00000070961
-0.453353	NCK2	NCK adaptor protein 2	1673.06	4.29342e-22	ENSG00000071051
0.147016	MAP4K4	mitogen-activated protein kinase kinase kinase kinase 4	2255.63	0.000608785	ENSG00000071054
0.585938	MGAT4A	mannosyl (alpha-1,3-)-glycoprotein beta-1,4-N-acetylglucosaminyltransferase, isozyme A	36.9323	0.0781794	ENSG00000071073
-0.161752	RPL31	ribosomal protein L31	11435	7.74796e-08	ENSG00000071082
-0.404877	WDR1	WD repeat domain 1	5390.51	2.21569e-41	ENSG00000071127
0.540625	SNX13	sorting nexin 13	2615.84	1.61669e-44	ENSG00000071189
0.21199	ARHGAP10	Rho GTPase activating protein 10	986.377	0.000267845	ENSG00000071205
1.05248	RPS6KA2	ribosomal protein S6 kinase A2	8.6082	0.113724	ENSG00000071242
0.601022	ING3	inhibitor of growth family member 3	780.089	9.19194e-20	ENSG00000071243
-0.172854	VASH1	vasohibin 1	198.231	0.240255	ENSG00000071246
1.58195	LMCD1	LIM and cysteine rich domains 1	593.617	3.39516e-92	ENSG00000071282
0.84437	BUD23	BUD23, rRNA methyltransferase and ribosome maturation factor	2540.47	9.47589e-103	ENSG00000071462
0.229271	SEL1L	SEL1L ERAD E3 ligase adaptor subunit	4181.12	1.31585e-11	ENSG00000071537
-0.837952	TRIP13	thyroid hormone receptor interactor 13	1381.49	5.6549e-64	ENSG00000071539
0.236097	ATP6AP1	ATPase H+ transporting accessory protein 1	3516.07	2.04245e-11	ENSG00000071553
-0.252869	TCF3	transcription factor 3	1828.68	7.34198e-09	ENSG00000071564
-1.19312	TRIB2	tribbles pseudokinase 2	762.624	1.81725e-68	ENSG00000071575
-0.244912	DAZAP1	DAZ associated protein 1	3444.51	2.64387e-11	ENSG00000071626
-0.490756	MBD3	methyl-CpG binding domain protein 3	2451.79	2.34563e-37	ENSG00000071655
-0.513199	HLTF	helicase like transcription factor	2214.18	1.10764e-36	ENSG00000071794
0.403515	FAM50A	family with sequence similarity 50 member A	3156.38	3.92972e-26	ENSG00000071859
-0.495056	FAM3A	family with sequence similarity 3 member A	716.515	1.08322e-13	ENSG00000071889
-0.298821	CPSF1	cleavage and polyadenylation specific factor 1	1098.97	8.35444e-08	ENSG00000071894
-0.189318	CYBRD1	cytochrome b reductase 1	3761.72	1.18772e-06	ENSG00000071967
-0.580818	CDH19	cadherin 19	639.279	3.08927e-13	ENSG00000071991
0.00128823	PDCD2	programmed cell death 2	888.848	0.98614	ENSG00000071994
2.04861	SLC6A15	solute carrier family 6 member 15	46.7823	2.60335e-12	ENSG00000072041
-0.0582774	RDH11	retinol dehydrogenase 11	1301.29	0.320264	ENSG00000072042
-0.597751	PRKACA	protein kinase cAMP-activated catalytic subunit alpha	1811.28	2.5294e-42	ENSG00000072062
-0.451712	ADGRL1	adhesion G protein-coupled receptor L1	188.248	0.000659737	ENSG00000072071
-0.579551	ACTN1	actinin alpha 1	7188.98	2.14801e-80	ENSG00000072110
0.581427	ZFYVE26	zinc finger FYVE-type containing 26	843.325	1.82351e-19	ENSG00000072121
-0.1034	RPS6KA6	ribosomal protein S6 kinase A6	53.3765	0.711671	ENSG00000072133
-0.329264	EPN2	epsin 2	761.533	1.05941e-06	ENSG00000072134
-0.815678	PTPN18	protein tyrosine phosphatase, non-receptor type 18	582.166	1.77661e-28	ENSG00000072135
-0.95592	LIMS2	LIM zinc finger domain containing 2	884.181	1.29344e-55	ENSG00000072163
2.09249	ASIC4	acid sensing ion channel subunit family member 4	3.69518	0.0539543	ENSG00000072182
-0.110003	SPEG	SPEG complex locus	93.1317	0.592356	ENSG00000072195
-0.110003	LOC100996693	CAVP-target protein-like	93.1317	0.592356	ENSG00000072195
0.379317	LNX1	ligand of numb-protein X 1	31.0413	0.27875	ENSG00000072201
-1.32224	ALDH3A2	aldehyde dehydrogenase 3 family member A2	2620.99	2.06637e-256	ENSG00000072210
0.817577	TFRC	transferrin receptor	11268.1	3.69514e-226	ENSG00000072274
-0.691977	SREBF1	sterol regulatory element binding transcription factor 1	1082.63	1.52128e-32	ENSG00000072310
1.8125	AFF4	AF4/FMR2 family member 4	9442.83	0	ENSG00000072364
2.02622	UBE2D1	ubiquitin conjugating enzyme E2 D1	771.05	2.45073e-173	ENSG00000072401
0.262291	MPP5	membrane palmitoylated protein 5	1656.73	1.19988e-07	ENSG00000072415
-1.57671	RHOBTB1	Rho related BTB domain containing 1	149.624	6.16878e-25	ENSG00000072422
0.0160229	SMC1A	structural maintenance of chromosomes 1A	4511.45	0.663166	ENSG00000072501
-0.0122523	HSD17B10	hydroxysteroid 17-beta dehydrogenase 10	1557.42	0.830194	ENSG00000072506
0.834406	MARK2	microtubule affinity regulating kinase 2	1497.96	5.16061e-68	ENSG00000072518
-1.11769	HMMR	hyaluronan mediated motility receptor	1415.29	3.89102e-96	ENSG00000072571
-0.0427964	CHFR	checkpoint with forkhead and ring finger domains	485.608	0.654111	ENSG00000072609
0.423116	P4HA2	prolyl 4-hydroxylase subunit alpha 2	2098.96	5.75926e-24	ENSG00000072682
-0.421588	NFATC3	nuclear factor of activated T cells 3	1208.72	1.1868e-15	ENSG00000072736
-0.100273	TRNT1	tRNA nucleotidyl transferase 1	752.764	0.150017	ENSG00000072756
-0.368661	ACADVL	acyl-CoA dehydrogenase very long chain	1821.72	2.46778e-15	ENSG00000072778
0.00501875	STK10	serine/threonine kinase 10	832.819	0.950907	ENSG00000072786
-0.246786	FBXW11	F-box and WD repeat domain containing 11	2026.71	5.22227e-09	ENSG00000072803
-0.0717909	ACAP1	ArfGAP with coiled-coil, ankyrin repeat and PH domains 1	25.2202	0.859056	ENSG00000072818
-0.537604	CRMP1	collapsin response mediator protein 1	122.005	0.0012291	ENSG00000072832
-0.403141	EVC	EvC ciliary complex subunit 1	590.112	4.04781e-08	ENSG00000072840
0.17683	DERL2	derlin 2	628.739	0.0263364	ENSG00000072849
-1.71509	SIDT1	SID1 transmembrane family member 1	2.06047	0.237227	ENSG00000072858
-0.95526	NDE1	nudE neurodevelopment protein 1	568.21	1.23013e-32	ENSG00000072864
0.908051	TMEM38A	transmembrane protein 38A	99.4142	4.75281e-07	ENSG00000072954
-0.505705	AP1M1	adaptor related protein complex 1 mu 1 subunit	1870.01	1.03647e-31	ENSG00000072958
1.15633	PVR	poliovirus receptor	5571.05	0	ENSG00000073008
-0.526218	XRCC1	X-ray repair cross complementing 1	917.461	2.58636e-18	ENSG00000073050
-0.608672	SCARB1	scavenger receptor class B member 1	765.588	8.36593e-18	ENSG00000073060
1.04359	CYP2W1	cytochrome P450 family 2 subfamily W member 1	5.32149	0.21829	ENSG00000073067
0.418313	MCM2	minichromosome maintenance complex component 2	2834.71	1.29168e-27	ENSG00000073111
0.458315	PANX2	pannexin 2	36.5465	0.188833	ENSG00000073150
0.223936	SELENOO	selenoprotein O	281.279	0.0402737	ENSG00000073169
-0.146053	TP63	tumor protein p63	1.95348	0.921553	ENSG00000073282
-0.0856086	ALPK1	alpha kinase 1	331.32	0.432051	ENSG00000073331
-0.357643	LLGL2	LLGL2, scribble cell polarity complex component	540.952	1.37189e-05	ENSG00000073350
-0.0385439	PDE8A	phosphodiesterase 8A	831.334	0.598224	ENSG00000073417
-0.372823	CLCN4	chloride voltage-gated channel 4	468.152	9.27705e-06	ENSG00000073464
0.633125	NLE1	notchless homolog 1	567.203	4.57142e-17	ENSG00000073536
0.0286381	SDHA	succinate dehydrogenase complex flavoprotein subunit A	1633.46	0.601691	ENSG00000073578
0.242291	SMARCE1	SWI/SNF related, matrix associated, actin dependent regulator of chromatin, subfamily e, member 1	3153.12	1.77283e-09	ENSG00000073584
2.63854	FNDC8	fibronectin type III domain containing 8	8.7639	0.000521413	ENSG00000073598
1.65105	GSDMB	gasdermin B	69.4475	3.56944e-13	ENSG00000073605
0.779217	KDM5A	lysine demethylase 5A	1169.32	5.4214e-48	ENSG00000073614
0.344974	ADAM11	ADAM metallopeptidase domain 11	55.6766	0.179223	ENSG00000073670
0.356803	PPP2R3A	protein phosphatase 2 regulatory subunit B''alpha	1005.79	1.76177e-08	ENSG00000073711
0.00855723	FERMT2	fermitin family member 2	1719.4	0.875305	ENSG00000073712
0.296152	PTGS2	prostaglandin-endoperoxide synthase 2	1570.49	2.0606e-09	ENSG00000073756
0.667179	IGF2BP2	insulin like growth factor 2 mRNA binding protein 2	737.046	3.17284e-22	ENSG00000073792
0.247784	MAP3K13	mitogen-activated protein kinase kinase kinase 13	1057.7	1.68087e-05	ENSG00000073803
-1.80236	ST6GAL1	ST6 beta-galactoside alpha-2,6-sialyltransferase 1	912.296	3.3748e-168	ENSG00000073849
3.50089	TBX21	T-box 21	4.29058	0.00638562	ENSG00000073861
-0.537732	FRY	FRY microtubule binding protein	425.486	1.29349e-09	ENSG00000073910
-0.173166	PICALM	phosphatidylinositol binding clathrin assembly protein	7320.38	1.74851e-10	ENSG00000073921
0.0518307	NSF	N-ethylmaleimide sensitive factor, vesicle fusing ATPase	1660.17	0.325886	ENSG00000073969
-0.0805181	GLI2	GLI family zinc finger 2	19.762	0.860102	ENSG00000074047
0.0898948	CLASP1	cytoplasmic linker associated protein 1	1573.49	0.078624	ENSG00000074054
-0.383817	MRPS34	mitochondrial ribosomal protein S34	1366.5	1.26638e-14	ENSG00000074071
-1.05484	NOTCH3	notch 3	169.313	4.26709e-14	ENSG00000074181
-0.393319	CLNS1A	chloride nucleotide-sensitive channel 1A	2143.94	7.89608e-20	ENSG00000074201
0.0133963	PPP2R2C	protein phosphatase 2 regulatory subunit Bgamma	8.44213	0.985433	ENSG00000074211
-1.20178	TEAD2	TEA domain transcription factor 2	266.841	9.97864e-28	ENSG00000074219
0.346776	EED	embryonic ectoderm development	1012.83	2.08389e-09	ENSG00000074266
-1.42827	CDHR2	cadherin related family member 2	10.5064	0.0225012	ENSG00000074276
0.35955	TSG101	tumor susceptibility 101	1729.04	3.84609e-15	ENSG00000074319
0.0321727	NCBP3	nuclear cap binding subunit 3	418.751	0.748952	ENSG00000074356
1.43287	ATP2A3	ATPase sarcoplasmic/endoplasmic reticulum Ca2+ transporting 3	3.87899	0.152823	ENSG00000074370
-0.33364	CA12	carbonic anhydrase 12	4624.12	1.41813e-23	ENSG00000074410
-0.114389	MGLL	monoglyceride lipase	12049.7	3.79284e-06	ENSG00000074416
-0.346875	NTN4	netrin 4	6509.07	1.01221e-29	ENSG00000074527
0.304043	BCS1L	BCS1 homolog, ubiquinol-cytochrome c reductase complex chaperone	331.15	0.00237332	ENSG00000074582
-0.647233	NUAK1	NUAK family kinase 1	867.182	3.15981e-25	ENSG00000074590
0.782194	DPP8	dipeptidyl peptidase 8	2258.1	9.09691e-76	ENSG00000074603
-0.645502	SLC24A1	solute carrier family 24 member 1	363.45	4.67781e-12	ENSG00000074621
-1.47795	ZNF532	zinc finger protein 532	961.688	6.63559e-129	ENSG00000074657
2.27528	SCARF1	scavenger receptor class F member 1	6.10702	0.00915046	ENSG00000074660
-0.0229055	LMAN1	lectin, mannose binding 1	3387.47	0.563937	ENSG00000074695
-0.0947845	HACD3	3-hydroxyacyl-CoA dehydratase 3	5500	0.00246607	ENSG00000074696
1.14214	ZZEF1	zinc finger ZZ-type and EF-hand domain containing 1	1051.99	7.58658e-84	ENSG00000074755
0.156513	ENO1	enolase 1	54610.2	1.65627e-16	ENSG00000074800
0.0514482	MYDGF	myeloid derived growth factor	2863.67	0.199697	ENSG00000074842
-0.714138	ANO8	anoctamin 8	311.709	5.46906e-12	ENSG00000074855
0.41572	TUBE1	tubulin epsilon 1	209.288	0.00153316	ENSG00000074935
-0.705812	ARHGEF10L	Rho guanine nucleotide exchange factor 10 like	511.267	6.44593e-17	ENSG00000074964
3.86147	TXK	TXK tyrosine kinase	43.2155	1.61284e-19	ENSG00000074966
0.0202437	TACR2	tachykinin receptor 2	3.16989	0.986388	ENSG00000075073
0.438103	ACTR6	ARP6 actin related protein 6 homolog	989.471	2.84862e-14	ENSG00000075089
0.139341	TIPIN	TIMELESS interacting protein	575.17	0.0874955	ENSG00000075131
-0.791149	SRI	sorcin	2087.27	1.12921e-68	ENSG00000075142
-0.0392865	EIF4G3	eukaryotic translation initiation factor 4 gamma 3	3162.59	0.300427	ENSG00000075151
-0.472939	NUP37	nucleoporin 37	818.481	4.35085e-14	ENSG00000075188
-0.214438	SEMA3A	semaphorin 3A	1710.97	5.49151e-06	ENSG00000075213
-0.695382	GTSE1	G2 and S-phase expressed 1	525.146	4.55746e-19	ENSG00000075218
-0.383467	SEMA3C	semaphorin 3C	3833.4	6.50993e-32	ENSG00000075223
0.0479516	TTC38	tetratricopeptide repeat domain 38	166.226	0.760939	ENSG00000075234
-0.0458904	ACAT1	acetyl-CoA acetyltransferase 1	2342.52	0.302128	ENSG00000075239
-0.797736	GRAMD4	GRAM domain containing 4	118.811	1.41177e-06	ENSG00000075240
2.35901	CELSR1	cadherin EGF LAG seven-pass G-type receptor 1	19.3541	1.37307e-06	ENSG00000075275
2.09841	WNT8B	Wnt family member 8B	4.59421	0.0316873	ENSG00000075290
0.870429	ZNF638	zinc finger protein 638	3751.64	1.06294e-148	ENSG00000075292
-0.543933	SLC25A40	solute carrier family 25 member 40	1128.33	1.30999e-21	ENSG00000075303
0.155054	TIMM21	translocase of inner mitochondrial membrane 21	862.924	0.0145989	ENSG00000075336
-0.5258	ADD2	adducin 2	1042.83	5.5944e-20	ENSG00000075340
1.97764	RASAL2	RAS protein activator like 2	2211.17	0	ENSG00000075391
-0.589681	VPS9D1	VPS9 domain containing 1	365.069	1.059e-09	ENSG00000075399
0.268474	ZNF37A	zinc finger protein 37A	647.592	0.000217031	ENSG00000075407
0.401665	MARK3	microtubule affinity regulating kinase 3	1489.31	7.0467e-17	ENSG00000075413
-0.117072	SLC25A3	solute carrier family 25 member 3	9194.85	6.17422e-06	ENSG00000075415
-0.267119	FNDC3B	fibronectin type III domain containing 3B	2710.26	9.9989e-12	ENSG00000075420
0.92745	FOSL2	FOS like 2, AP-1 transcription factor subunit	3808.64	1.39737e-171	ENSG00000075426
0.569821	FRYL	FRY like transcription coactivator	1610.06	3.43251e-31	ENSG00000075539
0.958816	TMEM131	transmembrane protein 131	1768.46	1.02712e-98	ENSG00000075568
-0.0751828	FSCN1	fascin actin-bundling protein 1	4384.96	0.0265116	ENSG00000075618
-1.49432	ACTB	actin beta	61648.1	0	ENSG00000075624
-0.227045	MOCOS	molybdenum cofactor sulfurase	64.3521	0.376867	ENSG00000075643
-1.09691	PLD1	phospholipase D1	1004.54	9.87388e-73	ENSG00000075651
-1.04957	ATP12A	ATPase H+/K+ transporting non-gastric alpha2 subunit	47.3639	5.80425e-05	ENSG00000075673
0.290533	WDR62	WD repeat domain 62	2195.68	6.31671e-12	ENSG00000075702
-0.263876	DLG1	discs large MAGUK scaffold protein 1	3420.99	2.78035e-14	ENSG00000075711
0.919767	RAB7A	RAB7A, member RAS oncogene family	9612.2	4.34205e-278	ENSG00000075785
-0.244547	BCAP29	B cell receptor associated protein 29	2540.34	7.41399e-10	ENSG00000075790
-0.343451	SEC31B	SEC31 homolog B, COPII coat complex component	238.643	0.00519936	ENSG00000075826
0.940944	SART3	squamous cell carcinoma antigen recognized by T cells 3	2244.21	1.03331e-111	ENSG00000075856
1.42312	ARHGAP15	Rho GTPase activating protein 15	1.9485	0.340482	ENSG00000075884
-0.665702	TUBA3D	tubulin alpha 3d	8.569	0.304689	ENSG00000075886
-0.054437	EXOSC7	exosome component 7	617.345	0.501105	ENSG00000075914
0.114275	KIFAP3	kinesin associated protein 3	787.339	0.103711	ENSG00000075945
0.389631	MKRN2	makorin ring finger protein 2	1249.87	9.24646e-14	ENSG00000075975
-0.937905	MCM6	minichromosome maintenance complex component 6	2195.5	1.16066e-100	ENSG00000076003
-0.302743	REXO2	RNA exonuclease 2	1664.23	2.60376e-11	ENSG00000076043
0.340446	RBM7	RNA binding motif protein 7	737.902	1.03692e-06	ENSG00000076053
-0.605553	RBMS2	RNA binding motif single stranded interacting protein 2	861.776	1.79398e-21	ENSG00000076067
0.509319	BAZ2A	bromodomain adjacent to zinc finger domain 2A	2410.41	3.60603e-39	ENSG00000076108
0.217535	PTPN23	protein tyrosine phosphatase, non-receptor type 23	1502.18	9.28751e-06	ENSG00000076201
-0.341844	MLH1	mutL homolog 1	1210.2	1.06722e-10	ENSG00000076242
-0.606431	UNG	uracil DNA glycosylase	1080.24	2.99608e-26	ENSG00000076248
-0.248445	FMO4	flavin containing monooxygenase 4	65.2472	0.289334	ENSG00000076258
0.784164	KLHL20	kelch like family member 20	847.882	3.54223e-35	ENSG00000076321
-0.391322	RGS11	regulator of G protein signaling 11	264.712	0.00103759	ENSG00000076344
-0.77862	SLC46A1	solute carrier family 46 member 1	108.756	5.12566e-06	ENSG00000076351
0.73463	PLXNA2	plexin A2	130.095	1.8054e-05	ENSG00000076356
-0.906757	SPAG5	sperm associated antigen 5	1780.13	1.39085e-90	ENSG00000076382
0.43269	ANKRD13A	ankyrin repeat domain 13A	1185.68	2.76455e-15	ENSG00000076513
-0.225113	TPD52	tumor protein D52	2333.9	2.01158e-08	ENSG00000076554
-0.0590992	ACACB	acetyl-CoA carboxylase beta	116.577	0.759456	ENSG00000076555
0.341009	TRAF4	TNF receptor associated factor 4	1789.77	3.0655e-14	ENSG00000076604
-0.381953	PAG1	phosphoprotein membrane anchor with glycosphingolipid microdomains 1	2375.27	7.4719e-20	ENSG00000076641
1.13696	GPATCH1	G-patch domain containing 1	921.307	2.24913e-74	ENSG00000076650
-0.433979	ICAM3	intercellular adhesion molecule 3	250.74	0.000163867	ENSG00000076662
-0.0575872	NT5C2	5'-nucleotidase, cytosolic II	1317.22	0.344798	ENSG00000076685
-0.0533449	MCAM	melanoma cell adhesion molecule	5435.15	0.0886376	ENSG00000076706
0.0851029	GPC4	glypican 4	351.317	0.422134	ENSG00000076716
-0.958916	MBNL3	muscleblind like splicing regulator 3	233.867	1.75144e-15	ENSG00000076770
2.20061	CAMSAP3	calmodulin regulated spectrin associated protein family member 3	36.2772	8.45578e-11	ENSG00000076826
0.887115	RAP1GAP	RAP1 GTPase activating protein	60.6612	0.000191497	ENSG00000076864
0.394235	XAB2	XPA binding protein 2	1130.95	6.49794e-13	ENSG00000076924
-0.818098	ARHGEF1	Rho guanine nucleotide exchange factor 1	3182.12	9.85084e-106	ENSG00000076928
-0.818098	LOC100505585	uncharacterized LOC100505585	3182.12	9.85084e-106	ENSG00000076928
-0.0217874	STXBP2	syntaxin binding protein 2	619.031	0.807265	ENSG00000076944
0.0853978	MAP2K7	mitogen-activated protein kinase kinase 7	809.272	0.251177	ENSG00000076984
0.804442	DGKD	diacylglycerol kinase delta	768.603	1.152e-33	ENSG00000077044
0.101551	CTTNBP2	cortactin binding protein 2	91.4946	0.632916	ENSG00000077063
-1.28037	RARB	retinoic acid receptor beta	36.2458	2.4655e-05	ENSG00000077092
-0.345898	TOP2B	DNA topoisomerase II beta	3274.88	1.43492e-22	ENSG00000077097
0.302474	TM9SF3	transmembrane 9 superfamily member 3	7304.88	3.75686e-32	ENSG00000077147
0.617869	NFKB2	nuclear factor kappa B subunit 2	961.288	1.00106e-25	ENSG00000077150
-0.496057	UBE2T	ubiquitin conjugating enzyme E2 T	1068.36	1.10884e-18	ENSG00000077152
-0.844708	PPP1R12B	protein phosphatase 1 regulatory subunit 12B	951.738	1.14186e-45	ENSG00000077157
-0.664405	DNAJC10	DnaJ heat shock protein family (Hsp40) member C10	4347.8	2.67958e-88	ENSG00000077232
-0.149833	GTF3C1	general transcription factor IIIC subunit 1	2530.82	0.00028348	ENSG00000077235
-0.16091	IL4R	interleukin 4 receptor	198.781	0.269335	ENSG00000077238
0.314603	USP33	ubiquitin specific peptidase 33	2712.25	4.12399e-17	ENSG00000077254
-2.53563	PAK3	p21 (RAC1) activated kinase 3	5.29504	0.00690761	ENSG00000077264
-1.56167	CAPN6	calpain 6	9.28852	0.0139449	ENSG00000077274
0.00928764	SNRPA	small nuclear ribonucleoprotein polypeptide A	1352.81	0.881509	ENSG00000077312
0.251452	EXOSC5	exosome component 5	674.613	0.000389767	ENSG00000077348
-0.111354	DYNC1I2	dynein cytoplasmic 1 intermediate chain 2	2313.6	0.00849955	ENSG00000077380
0.0737915	APBB1IP	amyloid beta precursor protein binding family B member 1 interacting protein	73.9362	0.758319	ENSG00000077420
0.0519496	LRCH4	leucine rich repeats and calponin homology domain containing 4	1055.91	0.40929	ENSG00000077454
0.401006	FAM76B	family with sequence similarity 76 member B	653.879	2.19833e-08	ENSG00000077458
0.455795	SIRT6	sirtuin 6	453.395	7.20811e-08	ENSG00000077463
0.54367	POLD3	DNA polymerase delta 3, accessory subunit	1228.27	6.62856e-25	ENSG00000077514
1.395	ACTN2	actinin alpha 2	5.78063	0.103572	ENSG00000077522
-0.598099	CAPZB	capping actin protein of muscle Z-line beta subunit	3868.24	3.45488e-74	ENSG00000077549
0.448622	GPR137B	G protein-coupled receptor 137B	267.118	8.36317e-05	ENSG00000077585
0.748174	NAALAD2	N-acetylated alpha-linked acidic dipeptidase 2	44.4119	0.00592671	ENSG00000077616
0.108509	JADE1	jade family PHD finger 1	1486.12	0.0333421	ENSG00000077684
-0.544631	SLC25A43	solute carrier family 25 member 43	677.373	1.61044e-13	ENSG00000077713
0.125	UBE2A	ubiquitin conjugating enzyme E2 A	2985.69	0.00112078	ENSG00000077721
1.48838	FGFR1	fibroblast growth factor receptor 1	4940.55	0	ENSG00000077782
2.16232	FKBP6	FK506 binding protein 6	4.83399	0.0270291	ENSG00000077800
-0.554273	SMC1B	structural maintenance of chromosomes 1B	2.33637	0.673247	ENSG00000077935
-0.640867	FBLN1	fibulin 1	1665.12	3.56945e-45	ENSG00000077942
3.22478	CST7	cystatin F	3.6269	0.0153955	ENSG00000077984
1.72856	MAP2	microtubule associated protein 2	388.648	1.96752e-66	ENSG00000078018
0.465501	PIAS2	protein inhibitor of activated STAT 2	937.169	1.10084e-14	ENSG00000078043
2.02347	AMPH	amphiphysin	3.55783	0.0809559	ENSG00000078053
-0.0590819	ARAF	A-Raf proto-oncogene, serine/threonine kinase	903.641	0.408905	ENSG00000078061
0.962377	MCCC1	methylcrotonoyl-CoA carboxylase 1	781.015	1.46222e-46	ENSG00000078070
1.16572	LAMP3	lysosomal associated membrane protein 3	28.8514	0.0007104	ENSG00000078081
-0.689407	FAP	fibroblast activation protein alpha	323.823	9.13234e-11	ENSG00000078098
-0.0990548	NEBL	nebulette	1081.77	0.105694	ENSG00000078114
0.610409	ACER3	alkaline ceramidase 3	1287.22	6.27044e-32	ENSG00000078124
0.106131	UBE2K	ubiquitin conjugating enzyme E2 K	2864.9	0.00427439	ENSG00000078140
0.524133	PIK3C3	phosphatidylinositol 3-kinase catalytic subunit type 3	1520.91	4.7927e-28	ENSG00000078142
-0.738451	N4BP2	NEDD4 binding protein 2	326.232	1.15747e-13	ENSG00000078177
0.515261	TIGAR	TP53 induced glycolysis regulatory phosphatase	330.409	4.68423e-07	ENSG00000078237
-0.382895	TULP3	tubby like protein 3	340.199	0.000113186	ENSG00000078246
-0.167098	SYNJ2	synaptojanin 2	290.237	0.136295	ENSG00000078269
-0.961119	ADCY2	adenylate cyclase 2	4.20553	0.311416	ENSG00000078295
-0.641757	PPP2R5C	protein phosphatase 2 regulatory subunit B'gamma	2478.65	1.11159e-54	ENSG00000078304
-0.317306	GNB1	G protein subunit beta 1	9083.91	4.11135e-36	ENSG00000078369
-0.197963	HOXA9	homeobox A9	19.625	0.667272	ENSG00000078399
0.186772	EDN1	endothelin 1	77.1412	0.430294	ENSG00000078401
-0.0286471	MLLT10	MLLT10, histone lysine methyltransferase DOT1L cofactor	445.759	0.778028	ENSG00000078403
-0.728494	ZCWPW1	zinc finger CW-type and PWWP domain containing 1	153.579	7.40528e-07	ENSG00000078487
-0.751665	ITM2A	integral membrane protein 2A	484.916	5.56716e-20	ENSG00000078596
0.1422	NRDC	nardilysin convertase	6216.35	3.31027e-07	ENSG00000078618
-0.515494	VDAC3	voltage dependent anion channel 3	2974.98	1.94915e-46	ENSG00000078668
0.19747	PCM1	pericentriolar material 1	5085.18	1.86399e-11	ENSG00000078674
1.14073	TNRC6C	trinucleotide repeat containing 6C	732.285	5.63246e-63	ENSG00000078687
0.508156	CBFA2T2	CBFA2/RUNX1 translocation partner 2	942.88	8.07596e-18	ENSG00000078699
-1.03461	BRINP1	BMP/retinoic acid inducible neural specific 1	789.174	1.05321e-49	ENSG00000078725
0.443181	ITCH	itchy E3 ubiquitin protein ligase	2522.16	7.26805e-22	ENSG00000078747
1.07171	PKD2L2	polycystin 2 like 2, transient receptor potential cation channel	6.47094	0.155069	ENSG00000078795
0.941004	TP53INP2	tumor protein p53 inducible nuclear protein 2	1084.5	2.17195e-61	ENSG00000078804
-0.174511	SDF4	stromal cell derived factor 4	3407.29	2.2741e-06	ENSG00000078808
-0.19359	MYH7B	myosin heavy chain 7B	29.0811	0.627786	ENSG00000078814
-0.439359	TP73	tumor protein p73	160.029	0.00199586	ENSG00000078900
0.762305	TOLLIP	toll interacting protein	2604.17	4.77692e-90	ENSG00000078902
-0.258474	UBE2D4	ubiquitin conjugating enzyme E2 D4 (putative)	568.205	0.000848115	ENSG00000078967
-0.32961	CLUL1	clusterin like 1	8.1862	0.630752	ENSG00000079101
-0.0533532	RUNX1T1	RUNX1 translocation partner 1	17.109	0.918094	ENSG00000079102
0.537334	THOC1	THO complex 1	995.629	8.50796e-20	ENSG00000079134
-0.835394	FKBP7	FK506 binding protein 7	280.129	3.68003e-15	ENSG00000079150
0.981305	OSBPL6	oxysterol binding protein like 6	430.248	1.90943e-29	ENSG00000079156
-0.811616	SLC1A3	solute carrier family 1 member 3	281.472	5.09871e-14	ENSG00000079215
-0.358039	XRCC5	X-ray repair cross complementing 5	8607.88	1.13906e-44	ENSG00000079246
-0.453245	LXN	latexin	84.1676	0.0232651	ENSG00000079257
2.24181	SP140	SP140 nuclear body protein	8.02636	0.00258143	ENSG00000079263
0.323532	MKNK1	MAP kinase interacting serine/threonine kinase 1	718.374	1.45638e-06	ENSG00000079277
1.213	TNS1	tensin 1	8.62866	0.0693102	ENSG00000079308
0.761561	REXO1	RNA exonuclease 1 homolog	1322.9	3.21465e-48	ENSG00000079313
0.452805	SAR1A	secretion associated Ras related GTPase 1A	2719.91	7.64637e-34	ENSG00000079332
1.85397	CDC14A	cell division cycle 14A	113.517	3.7563e-24	ENSG00000079335
-0.303206	RAPGEF3	Rap guanine nucleotide exchange factor 3	80.426	0.186016	ENSG00000079337
2.06405	CEACAM1	carcinoembryonic antigen related cell adhesion molecule 1	19.0201	1.54154e-05	ENSG00000079385
0.278802	SENP1	SUMO specific peptidase 1	1084.69	5.01941e-07	ENSG00000079387
-0.288914	CIC	capicua transcriptional repressor	2482.55	2.50965e-11	ENSG00000079432
-0.523042	LIPE	lipase E, hormone sensitive type	172.064	0.000130714	ENSG00000079435
-0.656319	FDFT1	farnesyl-diphosphate farnesyltransferase 1	2226.12	8.52691e-47	ENSG00000079459
-1.04595	PAFAH1B3	platelet activating factor acetylhydrolase 1b catalytic subunit 3	573.26	1.03515e-44	ENSG00000079462
-0.157749	OPHN1	oligophrenin 1	163.626	0.316655	ENSG00000079482
-0.342957	KIF22	kinesin family member 22	1736.13	1.60556e-13	ENSG00000079616
-0.517035	CARMIL1	capping protein regulator and myosin 1 linker 1	791.325	3.55926e-15	ENSG00000079691
-0.0264503	PGM1	phosphoglucomutase 1	1922.35	0.587907	ENSG00000079739
0.423457	DDX1	DEAD-box helicase 1	4129.03	3.62778e-35	ENSG00000079785
0.300351	DNM2	dynamin 2	2942.14	5.21977e-15	ENSG00000079805
-0.0743415	EPB41L2	erythrocyte membrane protein band 4.1 like 2	1759.42	0.124477	ENSG00000079819
-2.02802	RIMS1	regulating synaptic membrane exocytosis 1	58.4011	1.59095e-14	ENSG00000079841
-0.701817	MOXD1	monooxygenase DBH like 1	224.955	6.56527e-09	ENSG00000079931
-0.0946274	STX7	syntaxin 7	1081.78	0.121856	ENSG00000079950
-0.212638	RABL2B	RAB, member of RAS oncogene family like 2B	119.257	0.226272	ENSG00000079974
-0.212638	RABL2A	RAB, member of RAS oncogene family like 2A	119.257	0.226272	ENSG00000079974
-0.290295	KEAP1	kelch like ECH associated protein 1	1447.82	4.57575e-09	ENSG00000079999
1.07653	PTPRH	protein tyrosine phosphatase, receptor type H	87.4877	7.86231e-08	ENSG00000080031
3.44665	DCT	dopachrome tautomerase	27.0538	2.60185e-12	ENSG00000080166
0.207591	SLC35C2	solute carrier family 35 member C2	1196.29	0.000130287	ENSG00000080189
0.799491	CRYBG3	crystallin beta-gamma domain containing 3	356.05	2.16413e-17	ENSG00000080200
0.348715	EPHA6	EPH receptor A6	4.79128	0.703855	ENSG00000080224
0.96562	RFX3	regulatory factor X3	84.0116	1.30805e-06	ENSG00000080298
0.448981	RIF1	replication timing regulatory factor 1	3571.18	9.6627e-40	ENSG00000080345
0.696279	RAB21	RAB21, member RAS oncogene family	3368.38	4.28401e-83	ENSG00000080371
2.45371	SLC4A4	solute carrier family 4 member 4	19.4402	1.08745e-06	ENSG00000080493
-0.147328	SMARCA2	SWI/SNF related, matrix associated, actin dependent regulator of chromatin, subfamily a, member 2	686.92	0.0389495	ENSG00000080503
-0.222416	SESN1	sestrin 1	142.346	0.18455	ENSG00000080546
-0.114294	MID2	midline 2	306.294	0.306575	ENSG00000080561
-0.74683	COL5A3	collagen type V alpha 3 chain	34.7397	0.019535	ENSG00000080573
0.371863	SRCAP	Snf2 related CREBBP activator protein	1917.65	3.58049e-16	ENSG00000080603
0.380906	PUM3	pumilio RNA binding family member 3	873.289	3.47887e-10	ENSG00000080608
0.368591	CPB2	carboxypeptidase B2	4.7265	0.69537	ENSG00000080618
1.59736	CHRNA3	cholinergic receptor nicotinic alpha 3 subunit	14.0238	0.00186494	ENSG00000080644
-0.315369	KCNN2	potassium calcium-activated channel subfamily N member 2	3.44061	0.787893	ENSG00000080709
0.993912	CNOT4	CCR4-NOT transcription complex subunit 4	1223.32	3.36203e-75	ENSG00000080802
0.257071	PSEN1	presenilin 1	1546.73	1.82999e-07	ENSG00000080815
-0.228986	CPOX	coproporphyrinogen oxidase	987.362	7.76267e-05	ENSG00000080819
-0.320382	CLDND1	claudin domain containing 1	2962.96	1.44645e-18	ENSG00000080822
0.831917	MOK	MOK protein kinase	357.233	1.00261e-16	ENSG00000080823
-0.89651	HSP90AA1	heat shock protein 90 alpha family class A member 1	45203.5	0	ENSG00000080824
0.316549	RBL1	RB transcriptional corepressor like 1	1300.05	1.02453e-09	ENSG00000080839
0.138517	DLGAP4	DLG associated protein 4	1608.28	0.00981179	ENSG00000080845
2.27463	IGSF9B	immunoglobulin superfamily member 9B	17.3933	9.38006e-06	ENSG00000080854
-0.550387	NDC80	NDC80, kinetochore complex component	1577.87	9.52819e-29	ENSG00000080986
0.357494	AP4E1	adaptor related protein complex 4 epsilon 1 subunit	1125.55	1.65404e-09	ENSG00000081014
-0.226602	RSBN1	round spermatid basic protein 1	416.183	0.0123044	ENSG00000081019
-0.094912	MAGI3	membrane associated guanylate kinase, WW and PDZ domain containing 3	404.742	0.332594	ENSG00000081026
1.46101	CXCL2	C-X-C motif chemokine ligand 2	33.3979	6.27811e-06	ENSG00000081041
0.773502	AFP	alpha fetoprotein	34.2005	0.0146618	ENSG00000081051
0.394442	COL4A4	collagen type IV alpha 4 chain	49.3403	0.13486	ENSG00000081052
0.0633964	TCF7	transcription factor 7	49.08	0.828628	ENSG00000081059
0.83097	OSTM1	osteopetrosis associated transmembrane protein 1	1536.26	9.91311e-69	ENSG00000081087
-1.15326	CDH7	cadherin 7	2.44283	0.405501	ENSG00000081138
1.41867	IMPG2	interphotoreceptor matrix proteoglycan 2	18.6637	0.00187071	ENSG00000081148
0.029423	PCNP	PEST proteolytic signal containing nuclear protein	4443.56	0.432763	ENSG00000081154
-0.038413	EXD2	exonuclease 3'-5' domain containing 2	723.349	0.621768	ENSG00000081177
2.80068	ARG2	arginase 2	97.4385	6.98906e-36	ENSG00000081181
0.912979	MEF2C	myocyte enhancer factor 2C	774.417	1.28943e-44	ENSG00000081189
-1.30652	PTPRC	protein tyrosine phosphatase, receptor type C	3.18165	0.256402	ENSG00000081237
-0.927698	PKP1	plakophilin 1	44.0469	0.000882483	ENSG00000081277
0.00154659	UBA5	ubiquitin like modifier activating enzyme 5	752.228	0.985546	ENSG00000081307
0.87656	STK17B	serine/threonine kinase 17b	2205.01	7.21655e-87	ENSG00000081320
-1.22184	CDC14B	cell division cycle 14B	1605.07	5.7318e-126	ENSG00000081377
0.34881	ZNF510	zinc finger protein 510	659.112	1.33754e-06	ENSG00000081386
-0.910917	LRP2	LDL receptor related protein 2	2.70974	0.453539	ENSG00000081479
1.63359	ZNF506	zinc finger protein 506	311.642	6.47027e-51	ENSG00000081665
-1.17488	JMJD4	jumonji domain containing 4	304.586	1.55297e-30	ENSG00000081692
0.0146289	DUSP12	dual specificity phosphatase 12	723.092	0.855262	ENSG00000081721
0.268219	AACS	acetoacetyl-CoA synthetase	958.042	6.47616e-06	ENSG00000081760
-0.134699	DELE1	DAP3 binding cell death enhancer 1	1019.3	0.0232303	ENSG00000081791
-1.97137	CADPS2	calcium dependent secretion activator 2	3232.98	0	ENSG00000081803
-0.579948	PCDHB4	protocadherin beta 4	98.0637	0.00148174	ENSG00000081818
-1.02592	PCDHA6	protocadherin alpha 6	2.8766	0.37294	ENSG00000081842
-1.13451	PCDHGA2	protocadherin gamma subfamily A, 2	17.0115	0.0115526	ENSG00000081853
0.15717	HSPB11	heat shock protein family B (small) member 11	1132.43	0.00658455	ENSG00000081870
0.55645	PHLPP1	PH domain and leucine rich repeat protein phosphatase 1	515.979	1.13913e-12	ENSG00000081913
2.18826	ATP8B1	ATPase phospholipid transporting 8B1	619.255	3.13074e-146	ENSG00000081923
-0.6221	IL12RB2	interleukin 12 receptor subunit beta 2	97.9262	0.00065822	ENSG00000081985
-0.169954	SMARCD3	SWI/SNF related, matrix associated, actin dependent regulator of chromatin, subfamily d, member 3	681.296	0.0223866	ENSG00000082014
0.548872	WDR70	WD repeat domain 70	853.947	1.92084e-18	ENSG00000082068
-0.741192	FYB1	FYN binding protein 1	53.6604	0.00437139	ENSG00000082074
-0.194736	MPP4	membrane palmitoylated protein 4	154.824	0.195053	ENSG00000082126
-0.740826	STRADB	STE20-related kinase adaptor beta	434.872	3.97664e-16	ENSG00000082146
0.121333	BZW1	basic leucine zipper and W2 domains 1	6489.81	1.39449e-05	ENSG00000082153
-1.03022	C1QTNF3	C1q and TNF related 3	5631.35	1.8919e-238	ENSG00000082196
-0.374065	ME2	malic enzyme 2	986.783	1.35281e-10	ENSG00000082212
0.641895	C5orf22	chromosome 5 open reading frame 22	1131.6	5.12731e-29	ENSG00000082213
0.746157	CCNT2	cyclin T2	2054.54	1.51518e-69	ENSG00000082258
-0.0310907	FAM135A	family with sequence similarity 135 member A	521.664	0.728601	ENSG00000082269
-0.525577	EPB41L3	erythrocyte membrane protein band 4.1 like 3	3826.61	3.40841e-51	ENSG00000082397
-0.448884	COBLL1	cordon-bleu WH2 repeat protein like 1	1961.48	2.02942e-25	ENSG00000082438
-0.756791	DLG3	discs large MAGUK scaffold protein 3	278.033	3.42096e-12	ENSG00000082458
-2.2365	KCNK2	potassium two pore domain channel subfamily K member 2	327.942	9.20476e-82	ENSG00000082482
-1.46688	SERTAD4	SERTA domain containing 4	1585.13	6.34313e-207	ENSG00000082497
-0.822056	TRAF5	TNF receptor associated factor 5	169.781	9.64955e-09	ENSG00000082512
0.232086	MRPL22	mitochondrial ribosomal protein L22	973.417	0.000147913	ENSG00000082515
0.381706	GEMIN5	gem nuclear organelle associated protein 5	1429.9	5.13294e-14	ENSG00000082516
-1.93121	OPRK1	opioid receptor kappa 1	212.715	7.96983e-46	ENSG00000082556
-0.128095	NFE2L1	nuclear factor, erythroid 2 like 1	7003.11	2.35732e-05	ENSG00000082641
0.479272	GSK3B	glycogen synthase kinase 3 beta	1923.59	9.3276e-28	ENSG00000082701
-0.628836	ITGB5	integrin subunit beta 5	4164.18	3.30207e-81	ENSG00000082781
-1.55669	ERC1	ELKS/RAB6-interacting/CAST family member 1	4766.16	0	ENSG00000082805
-0.0563863	XPO1	exportin 1	9292.95	0.0255093	ENSG00000082898
0.0782717	RNF13	ring finger protein 13	1147.36	0.184278	ENSG00000082996
-2.80154	TRPM3	transient receptor potential cation channel subfamily M member 3	36.4177	1.27882e-14	ENSG00000083067
0.276587	PALB2	partner and localizer of BRCA2	786.498	5.83201e-05	ENSG00000083093
0.665855	DOPEY1	dopey family member 1	325.222	3.67164e-11	ENSG00000083097
-0.218062	LYRM2	LYR motif containing 2	556.915	0.00470239	ENSG00000083099
-0.798972	BCKDHB	branched chain keto acid dehydrogenase E1 subunit beta	300.743	4.57934e-15	ENSG00000083123
0.354748	KAT6A	lysine acetyltransferase 6A	1824.94	9.24629e-16	ENSG00000083168
1.23985	ZCCHC6	zinc finger CCHC-type containing 6	1550.27	7.18653e-137	ENSG00000083223
-0.842628	ULK2	unc-51 like autophagy activating kinase 2	557.635	6.39891e-27	ENSG00000083290
-0.118786	TNPO1	transportin 1	5722.12	0.000227327	ENSG00000083312
-0.09595	PLOD1	procollagen-lysine,2-oxoglutarate 5-dioxygenase 1	4117.09	0.00464431	ENSG00000083444
1.30847	P2RX5	purinergic receptor P2X 5	4.88184	0.138379	ENSG00000083454
-0.219968	ITGAE	integrin subunit alpha E	335.899	0.0375811	ENSG00000083457
1.36324	DIS3	DIS3 homolog, exosome endoribonuclease and 3'-5' exoribonuclease	2963.31	1.22433e-281	ENSG00000083520
1.07345	PIBF1	progesterone immunomodulatory binding factor 1	861.519	1.46089e-63	ENSG00000083535
-0.155201	TDRD3	tudor domain containing 3	464.429	0.0853358	ENSG00000083544
1.23948	NUFIP1	NUFIP1, FMR1 interacting protein 1	689.332	1.37558e-60	ENSG00000083635
-0.565091	PDS5B	PDS5 cohesin associated factor B	1111.94	3.15231e-25	ENSG00000083642
0.223564	OXCT1	3-oxoacid CoA-transferase 1	1495.75	4.17268e-06	ENSG00000083720
0.173562	RRAGB	Ras related GTP binding B	369.02	0.0809687	ENSG00000083750
-1.48278	EPYC	epiphycan	153.59	1.20229e-21	ENSG00000083782
2.06483	CYLD	CYLD lysine 63 deubiquitinase	2571.62	0	ENSG00000083799
-0.875529	SLC27A5	solute carrier family 27 member 5	185.695	3.55927e-11	ENSG00000083807
0.322167	ZNF324	zinc finger protein 324	341.682	0.0013675	ENSG00000083812
1.00915	ZNF671	zinc finger protein 671	146.415	3.29101e-11	ENSG00000083814
0.937236	ZNF416	zinc finger protein 416	263.222	4.89081e-17	ENSG00000083817
1.06408	ZNF586	zinc finger protein 586	166.54	5.07651e-12	ENSG00000083828
-0.0694059	ZNF446	zinc finger protein 446	359.723	0.502801	ENSG00000083838
1.05471	ZNF264	zinc finger protein 264	189.657	2.09517e-14	ENSG00000083844
0.388126	RPS5	ribosomal protein S5	19958.8	2.25496e-46	ENSG00000083845
-0.233149	FAT1	FAT atypical cadherin 1	3891.45	1.25684e-10	ENSG00000083857
1.51432	YTHDC1	YTH domain containing 1	1364.41	1.21425e-169	ENSG00000083896
1.22467	CHMP2B	charged multivesicular body protein 2B	3302.68	5.56455e-252	ENSG00000083937
0.381906	SMAP2	small ArfGAP2	685.742	3.20221e-08	ENSG00000084070
0.576573	PPIE	peptidylprolyl isomerase E	1306.79	1.64433e-26	ENSG00000084072
0.298576	ZMPSTE24	zinc metallopeptidase STE24	2681.89	1.31196e-15	ENSG00000084073
-0.123352	STARD7	StAR related lipid transfer domain containing 7	3723.66	0.000208782	ENSG00000084090
0.0041322	NOA1	nitric oxide associated 1	656.51	0.964334	ENSG00000084092
0.158999	REST	RE1 silencing transcription factor	1165.03	0.00560943	ENSG00000084093
1.57752	HAL	histidine ammonia-lyase	6.24519	0.0515539	ENSG00000084110
-0.87554	SSH1	slingshot protein phosphatase 1	2259.36	1.09319e-95	ENSG00000084112
-0.808981	GSTP1	glutathione S-transferase pi 1	1592.19	5.28362e-58	ENSG00000084207
0.207911	APLP2	amyloid beta precursor like protein 2	7244.99	1.66683e-13	ENSG00000084234
0.34357	FAM234B	family with sequence similarity 234 member B	176.867	0.0113836	ENSG00000084444
0.775079	WBP11	WW domain binding protein 11	1538.5	2.28594e-55	ENSG00000084463
0.295089	EIF3I	eukaryotic translation initiation factor 3 subunit I	6410.49	2.92724e-24	ENSG00000084623
0.686712	NKAIN1	sodium/potassium transporting ATPase interacting 1	4.09528	0.475918	ENSG00000084628
-0.633036	COL16A1	collagen type XVI alpha 1 chain	1432.19	7.79076e-37	ENSG00000084636
0.0976981	TXLNA	taxilin alpha	3400.97	0.0068999	ENSG00000084652
-0.806467	APOB	apolipoprotein B	3.01359	0.476532	ENSG00000084674
0.0147874	NCOA1	nuclear receptor coactivator 1	819.535	0.840451	ENSG00000084676
-0.34672	AGBL5	ATP/GTP binding protein like 5	864.252	2.52585e-08	ENSG00000084693
1.25084	EFR3B	EFR3 homolog B	19.9309	0.00354461	ENSG00000084710
-0.914346	KIF3C	kinesin family member 3C	537.294	6.28662e-28	ENSG00000084731
-0.0563224	RAB10	RAB10, member RAS oncogene family	4353.69	0.108963	ENSG00000084733
-1.4392	GCKR	glucokinase regulator	13.2975	0.00642495	ENSG00000084734
0.290438	HADHA	hydroxyacyl-CoA dehydrogenase trifunctional multienzyme complex subunit alpha	3737.7	1.44775e-18	ENSG00000084754
0.146099	MAPRE3	microtubule associated protein RP/EB family member 3	301.127	0.177765	ENSG00000084764
-0.262595	CAD	carbamoyl-phosphate synthetase 2, aspartate transcarbamylase, and dihydroorotase	1383.81	1.97067e-07	ENSG00000084774
-0.398276	CD59	CD59 molecule (CD59 blood group)	6362.3	3.07643e-49	ENSG00000085063
0.544189	CD82	CD82 molecule	359.406	3.10644e-08	ENSG00000085117
0.503861	BCORL1	BCL6 corepressor like 1	355.681	1.0129e-07	ENSG00000085185
0.36399	ATRX	ATRX, chromatin remodeler	2302.83	2.80691e-19	ENSG00000085224
0.848753	AK6	adenylate kinase 6	7561.91	7.66044e-209	ENSG00000085231
0.802607	MYNN	myoneurin	907.744	1.52908e-39	ENSG00000085274
-0.829161	MECOM	MDS1 and EVI1 complex locus	45.5336	0.00282393	ENSG00000085276
-0.20756	SCAMP1	secretory carrier membrane protein 1	1179.58	0.000262898	ENSG00000085365
-0.398329	PREP	prolyl endopeptidase	684.173	6.57264e-09	ENSG00000085377
-0.662942	HACE1	HECT domain and ankyrin repeat containing E3 ubiquitin protein ligase 1	323.06	3.40225e-11	ENSG00000085382
-0.0752331	SEH1L	SEH1 like nucleoporin	1261.72	0.18519	ENSG00000085415
1.22595	WDR47	WD repeat domain 47	1600.04	2.79127e-131	ENSG00000085433
0.165968	WDFY1	WD repeat and FYVE domain containing 1	1392.1	0.00193734	ENSG00000085449
1.94574	OVGP1	oviductal glycoprotein 1	79.572	2.8454e-18	ENSG00000085465
-0.568003	SLC25A24	solute carrier family 25 member 24	1666.32	6.9338e-33	ENSG00000085491
-0.272537	MAP3K4	mitogen-activated protein kinase kinase kinase 4	1057.75	3.45902e-06	ENSG00000085511
0.131725	PILRA	paired immunoglobin like type 2 receptor alpha	16.5424	0.794266	ENSG00000085514
-0.827042	IGSF9	immunoglobulin superfamily member 9	28.371	0.0156089	ENSG00000085552
0.200589	ABCB1	ATP binding cassette subfamily B member 1	1634.47	9.41445e-05	ENSG00000085563
0.424812	ZNF213	zinc finger protein 213	295.286	5.28918e-05	ENSG00000085644
-0.4326	AKR1B1	aldo-keto reductase family 1 member B	6410.4	2.31175e-55	ENSG00000085662
0.158415	CPNE3	copine 3	3535.98	2.29125e-05	ENSG00000085719
1.65883	RRN3	RRN3 homolog, RNA polymerase I transcription factor	3358.49	0	ENSG00000085721
-0.146499	CTTN	cortactin	6033.74	3.60557e-07	ENSG00000085733
1.96254	WNT11	Wnt family member 11	5.9496	0.0195792	ENSG00000085741
-0.239763	MTIF2	mitochondrial translational initiation factor 2	1230.7	6.37713e-06	ENSG00000085760
-0.137061	DDHD2	DDHD domain containing 2	1354.93	0.0100333	ENSG00000085788
-1.11086	TTC39A	tetratricopeptide repeat domain 39A	54.2849	5.4455e-06	ENSG00000085831
-0.443885	EPS15	epidermal growth factor receptor pathway substrate 15	1633.24	8.1862e-23	ENSG00000085832
0.170639	ORC1	origin recognition complex subunit 1	541.268	0.0349224	ENSG00000085840
-0.946573	MGST2	microsomal glutathione S-transferase 2	69.6865	1.10133e-05	ENSG00000085871
0.296814	CHERP	calcium homeostasis endoplasmic reticulum protein	1040.56	4.28191e-07	ENSG00000085872
0.362377	ATG16L1	autophagy related 16 like 1	587.908	3.64635e-06	ENSG00000085978
-0.652993	USP40	ubiquitin specific peptidase 40	734.755	2.93645e-23	ENSG00000085982
-0.902882	POMGNT1	protein O-linked mannose N-acetylglucosaminyltransferase 1 (beta 1,2-)	2243.92	2.5504e-113	ENSG00000085998
-0.650291	RAD54L	RAD54 like	621.685	2.67032e-19	ENSG00000085999
0.254573	MAST2	microtubule associated serine/threonine kinase 2	1870.47	1.61363e-08	ENSG00000086015
0.13613	DNAJA1	DnaJ heat shock protein family (Hsp40) member A1	4054.13	5.00032e-05	ENSG00000086061
0.154097	B4GALT1	beta-1,4-galactosyltransferase 1	1526	0.00163439	ENSG00000086062
0.0807528	CHMP5	charged multivesicular body protein 5	1444.98	0.118838	ENSG00000086065
0.933562	NFX1	nuclear transcription factor, X-box binding 1	1147.86	2.89384e-64	ENSG00000086102
0.211972	DIMT1	DIM1 dimethyladenosine transferase 1 homolog	1295.31	7.15201e-05	ENSG00000086189
0.69311	IPO11	importin 11	1330.41	6.22923e-38	ENSG00000086200
0.69311	IPO11-LRRC70	IPO11-LRRC70 readthrough	1330.41	6.22923e-38	ENSG00000086200
-3.04922	FOLH1	folate hydrolase 1	13.1845	1.54172e-06	ENSG00000086205
-0.360625	EIF2AK1	eukaryotic translation initiation factor 2 alpha kinase 1	5047.64	1.42128e-33	ENSG00000086232
-0.574473	EPDR1	ependymin related 1	1434.95	1.00261e-31	ENSG00000086289
-0.501566	SNX10	sorting nexin 10	810.94	1.36765e-13	ENSG00000086300
-0.975359	SEPHS1	selenophosphate synthetase 1	707.703	2.10004e-46	ENSG00000086475
-0.217652	MRPL28	mitochondrial ribosomal protein L28	1162.71	0.000101085	ENSG00000086504
-1.50218	HBQ1	hemoglobin subunit theta 1	2.35776	0.253608	ENSG00000086506
0.0978376	ITPKC	inositol-trisphosphate 3-kinase C	644.359	0.19291	ENSG00000086544
1.27699	CEACAM6	carcinoembryonic antigen related cell adhesion molecule 6	3.58903	0.221988	ENSG00000086548
1.18998	FAT2	FAT atypical cadherin 2	14.8981	0.0156961	ENSG00000086570
0.937607	RBM22	RNA binding motif protein 22	1514.1	6.63843e-77	ENSG00000086589
0.0673566	TMED2	transmembrane p24 trafficking protein 2	7967.6	0.0217202	ENSG00000086598
0.531423	ERO1B	endoplasmic reticulum oxidoreductase 1 beta	333.22	1.3672e-07	ENSG00000086619
0.264421	ZFAND6	zinc finger AN1-type containing 6	2011.17	2.75404e-10	ENSG00000086666
-0.791851	HSD17B2	hydroxysteroid 17-beta dehydrogenase 2	20.6848	0.0490175	ENSG00000086696
0.926446	TXLNG	taxilin gamma	983.644	2.79253e-50	ENSG00000086712
-2.13358	PPEF1	protein phosphatase with EF-hand domain 1	44.97	3.10416e-13	ENSG00000086717
0.191786	LAT2	linker for activation of T cells family member 2	47.0323	0.521311	ENSG00000086730
0.608633	HUWE1	HECT, UBA and WWE domain containing 1, E3 ubiquitin protein ligase	5178.78	1.5652e-92	ENSG00000086758
0.270303	ZW10	zw10 kinetochore protein	828.498	2.2093e-05	ENSG00000086827
-0.617748	ALG9	ALG9, alpha-1,2-mannosyltransferase	836.744	7.66242e-23	ENSG00000086848
-1.56054	NOX4	NADPH oxidase 4	1.81328	0.317075	ENSG00000086991
-0.00892097	ACOX3	acyl-CoA oxidase 3, pristanoyl	289.545	0.941884	ENSG00000087008
-0.79416	MTMR2	myotubularin related protein 2	1684.05	2.24338e-66	ENSG00000087053
3.09055	PPP1R15A	protein phosphatase 1 regulatory subunit 15A	14578	0	ENSG00000087074
0.671301	HSD17B14	hydroxysteroid 17-beta dehydrogenase 14	21.2767	0.103087	ENSG00000087076
0.574697	TRIP6	thyroid hormone receptor interactor 6	5369.62	1.3479e-86	ENSG00000087077
0.45489	ACHE	acetylcholinesterase (Cartwright blood group)	16.6103	0.356818	ENSG00000087085
-0.238298	FTL	ferritin light chain	36017.3	2.12076e-23	ENSG00000087086
-0.0974425	SRRT	serrate, RNA effector molecule	2813.91	0.0124815	ENSG00000087087
-0.502365	BAX	BCL2 associated X, apoptosis regulator	883.855	3.83235e-15	ENSG00000087088
0.120955	NLK	nemo like kinase	447.926	0.179192	ENSG00000087095
-0.253012	PIGS	phosphatidylinositol glycan anchor biosynthesis class S	1291.7	1.22913e-06	ENSG00000087111
0.145692	TMPRSS11E	transmembrane serine protease 11E	11.0588	0.810312	ENSG00000087128
-0.311411	ATXN7L3	ataxin 7 like 3	1436.67	4.19706e-10	ENSG00000087152
1.04342	PGS1	phosphatidylglycerophosphate synthase 1	987.884	2.63084e-71	ENSG00000087157
-0.26267	PSMC5	proteasome 26S subunit, ATPase 5	4499.16	4.80376e-18	ENSG00000087191
0.52353	UIMC1	ubiquitin interaction motif containing 1	1145.86	1.02467e-21	ENSG00000087206
-0.320483	MMP2	matrix metallopeptidase 2	516.414	4.5368e-05	ENSG00000087245
3.24794	MT3	metallothionein 3	5.45792	0.00306783	ENSG00000087250
-0.219075	LPCAT2	lysophosphatidylcholine acyltransferase 2	721.314	0.00193292	ENSG00000087253
-0.278094	GNAO1	G protein subunit alpha o1	3.49062	0.79547	ENSG00000087258
0.901392	OGFOD1	2-oxoglutarate and iron dependent oxygenase domain containing 1	2119.97	6.18244e-99	ENSG00000087263
0.0772822	SH3BP2	SH3 domain binding protein 2	374.016	0.468238	ENSG00000087266
0.321156	NOP14	NOP14 nucleolar protein	1325.42	2.05593e-09	ENSG00000087269
-0.105904	ADD1	adducin 1	3615.88	0.00273304	ENSG00000087274
0.332708	L2HGDH	L-2-hydroxyglutarate dehydrogenase	195.567	0.011858	ENSG00000087299
0.453148	TXNDC16	thioredoxin domain containing 16	526.715	9.85314e-09	ENSG00000087301
-0.0445602	RTRAF	RNA transcription, translation and transport factor	2830.93	0.282034	ENSG00000087302
-0.966472	NID2	nidogen 2	1352.17	1.94438e-80	ENSG00000087303
-0.980746	GMCL1	germ cell-less, spermatogenesis associated 1	918.478	1.10033e-59	ENSG00000087338
0.309094	SF3B2	splicing factor 3b subunit 2	6849.52	3.69905e-29	ENSG00000087365
-0.022481	KLHL42	kelch like family member 42	1461.68	0.689044	ENSG00000087448
-0.0408669	GNAS	GNAS complex locus	16487.2	0.0967041	ENSG00000087460
-0.121178	DNM1L	dynamin 1 like	2818.45	0.0014037	ENSG00000087470
1.44178	PTHLH	parathyroid hormone like hormone	83.8191	1.05309e-11	ENSG00000087494
-1.29515	PHACTR3	phosphatase and actin regulator 3	2.21625	0.342481	ENSG00000087495
-0.23288	ERGIC2	ERGIC and golgi 2	1417.12	3.66939e-06	ENSG00000087502
-1.49529	AURKA	aurora kinase A	1686.77	1.40225e-212	ENSG00000087586
2.94212	CASS4	Cas scaffold protein family member 4	19.7369	1.69473e-08	ENSG00000087589
-1.305	PIR	pirin	709.154	4.81434e-75	ENSG00000087842
0.645886	AAMDC	adipogenesis associated Mth938 domain containing	404.27	1.33657e-11	ENSG00000087884
0.455193	RFX2	regulatory factor X2	112.421	0.00820779	ENSG00000087903
0.710143	METTL2A	methyltransferase like 2A	903.852	1.68941e-28	ENSG00000087995
-2.36028	SULT2B1	sulfotransferase family 2B member 1	4.81642	0.0149464	ENSG00000088002
-0.582023	ALG6	ALG6, alpha-1,3-glucosyltransferase	389.761	1.12937e-10	ENSG00000088035
0.471382	CNOT3	CCR4-NOT transcription complex subunit 3	1051.99	1.15046e-15	ENSG00000088038
-0.141147	GP6	glycoprotein VI platelet	2.63247	0.911003	ENSG00000088053
-0.32437	PTPN4	protein tyrosine phosphatase, non-receptor type 4	717.411	1.80996e-06	ENSG00000088179
0.751201	DDX18	DEAD-box helicase 18	4063.2	1.96263e-119	ENSG00000088205
0.535748	KHSRP	KH-type splicing regulatory protein	5820.13	7.89884e-79	ENSG00000088247
-0.111415	GNA11	G protein subunit alpha 11	3044.83	0.0050288	ENSG00000088256
-0.597015	ASAP3	ArfGAP with SH3 domain, ankyrin repeat and PH domain 3	551.263	1.96059e-14	ENSG00000088280
-0.597715	EDEM2	ER degradation enhancing alpha-mannosidase like protein 2	615.307	1.63011e-16	ENSG00000088298
-0.108064	DNMT3B	DNA methyltransferase 3 beta	127.415	0.541085	ENSG00000088305
-0.295952	TPX2	TPX2, microtubule nucleation factor	4946.3	1.72167e-20	ENSG00000088325
1.43049	PDRG1	p53 and DNA damage regulated 1	1468.8	4.07573e-161	ENSG00000088356
-0.311733	EPB41L1	erythrocyte membrane protein band 4.1 like 1	659.708	1.56009e-05	ENSG00000088367
0.651276	DOCK9	dedicator of cytokinesis 9	940.626	4.7444e-27	ENSG00000088387
1.09046	ANKRD10	ankyrin repeat domain 10	4119.12	4.0639e-251	ENSG00000088448
1.27269	TGDS	TDP-glucose 4,6-dehydratase	724.747	8.08971e-76	ENSG00000088451
0.727461	DOCK3	dedicator of cytokinesis 3	145.108	1.12743e-06	ENSG00000088538
-0.810582	C3orf18	chromosome 3 open reading frame 18	325.508	2.5286e-15	ENSG00000088543
0.281382	COQ9	coenzyme Q9	973.315	1.57128e-06	ENSG00000088682
4.41528	TMEM40	transmembrane protein 40	7.74006	0.000227385	ENSG00000088726
0.627108	KIF9	kinesin family member 9	216.872	2.75054e-07	ENSG00000088727
0.315448	ARHGAP28	Rho GTPase activating protein 28	82.7669	0.125457	ENSG00000088756
-0.147349	CRLS1	cardiolipin synthase 1	1099.77	0.0103924	ENSG00000088766
1.56039	PPP1R13B	protein phosphatase 1 regulatory subunit 13B	560.072	2.74229e-84	ENSG00000088808
0.144347	ATRN	attractin	2475.56	0.000272802	ENSG00000088812
2.36459	SMOX	spermine oxidase	257.684	1.39623e-75	ENSG00000088826
2.28046	SIGLEC1	sialic acid binding Ig like lectin 1	2.02843	0.143416	ENSG00000088827
-0.13698	FKBP1A	FK506 binding protein 1A	4712.6	7.41066e-06	ENSG00000088832
-0.54348	NSFL1C	NSFL1 cofactor	1281.28	1.87587e-26	ENSG00000088833
-2.80391	SLC4A11	solute carrier family 4 member 11	3091.3	0	ENSG00000088836
-1.0156	C20orf194	chromosome 20 open reading frame 194	664.734	7.29585e-43	ENSG00000088854
0.569734	ZNF343	zinc finger protein 343	638.933	2.96172e-15	ENSG00000088876
-0.816525	EBF4	early B cell factor 4	9.60198	0.181842	ENSG00000088881
-0.633464	MAVS	mitochondrial antiviral signaling protein	726.383	4.96704e-21	ENSG00000088888
0.386005	LZTS3	leucine zipper tumor suppressor family member 3	290.623	0.000265003	ENSG00000088899
0.577504	XRN2	5'-3' exoribonuclease 2	2740.62	6.27091e-51	ENSG00000088930
-0.934738	DYNLL1	dynein light chain LC8-type 1	4466.42	1.16303e-169	ENSG00000088986
-0.129335	SNX5	sorting nexin 5	3006.44	0.000393646	ENSG00000089006
0.177696	RPL6	ribosomal protein L6	10929.2	4.89782e-08	ENSG00000089009
0.542246	MAPKAPK5	mitogen-activated protein kinase-activated protein kinase 5	1066.33	1.61878e-22	ENSG00000089022
-0.0504319	P2RX7	purinergic receptor P2X 7	369.137	0.626802	ENSG00000089041
1.39306	ESF1	ESF1 nucleolar pre-rRNA processing protein homolog	2891.13	1.41993e-291	ENSG00000089048
-0.549289	RBBP9	RB binding protein 9, serine hydrolase	642.932	1.03578e-14	ENSG00000089050
-0.0502504	ANAPC5	anaphase promoting complex subunit 5	2379.18	0.303844	ENSG00000089053
-0.224416	SLC23A2	solute carrier family 23 member 2	1128.69	6.48991e-05	ENSG00000089057
-0.36585	SLC8B1	solute carrier family 8 member B1	357.706	0.000321688	ENSG00000089060
-0.212341	TMEM230	transmembrane protein 230	2213.92	9.93088e-07	ENSG00000089063
1.1298	DZANK1	double zinc ribbon and ankyrin repeat domains 1	160.057	2.77319e-15	ENSG00000089091
-0.0708842	KDM2B	lysine demethylase 2B	633.855	0.362315	ENSG00000089094
0.735197	CFAP61	cilia and flagella associated protein 61	3.29102	0.508702	ENSG00000089101
0.354548	TASP1	taspase 1	271.822	0.00198928	ENSG00000089123
-0.619922	OAS1	2'-5'-oligoadenylate synthetase 1	416.107	1.41011e-12	ENSG00000089127
0.480724	GCN1	GCN1, eIF2 alpha kinase activator homolog	4026.43	5.70868e-49	ENSG00000089154
-0.0227454	RPLP0	ribosomal protein lateral stalk subunit P0	33086.4	0.358154	ENSG00000089157
0.228947	PXN	paxillin	3612.85	3.87087e-11	ENSG00000089159
-0.069551	SIRT4	sirtuin 4	19.7226	0.880887	ENSG00000089163
-0.076901	KIF16B	kinesin family member 16B	622.678	0.338727	ENSG00000089177
0.300168	TRMT6	tRNA methyltransferase 6	1042.89	1.488e-07	ENSG00000089195
3.6561	CHGB	chromogranin B	9.5317	2.99046e-05	ENSG00000089199
-0.514225	PEBP1	phosphatidylethanolamine binding protein 1	5377.56	3.32868e-57	ENSG00000089220
1.19462	BRAP	BRCA1 associated protein	1260.2	7.20285e-111	ENSG00000089234
0.0183636	ERP29	endoplasmic reticulum protein 29	2668.18	0.688048	ENSG00000089248
-0.141213	FUS	FUS RNA binding protein	6726.06	5.01069e-06	ENSG00000089280
0.705436	IGBP1	immunoglobulin binding protein 1	1318.55	1.46443e-43	ENSG00000089289
-0.272528	FXYD5	FXYD domain containing ion transport regulator 5	943.846	1.03051e-05	ENSG00000089327
0.459491	ZNF302	zinc finger protein 302	1277.59	3.45877e-19	ENSG00000089335
-0.596694	GRAMD1A	GRAM domain containing 1A	805.136	1.17414e-17	ENSG00000089351
0.986784	CDIP1	cell death inducing p53 target 1	799.416	1.15238e-49	ENSG00000089486
-0.36146	CMTM1	CKLF like MARVEL transmembrane domain containing 1	19.7758	0.413831	ENSG00000089505
-0.530924	KCNH4	potassium voltage-gated channel subfamily H member 4	7.67215	0.449582	ENSG00000089558
0.136281	GANAB	glucosidase II alpha subunit	12123.4	2.8627e-07	ENSG00000089597
-0.450022	GMIP	GEM interacting protein	233.154	0.000175152	ENSG00000089639
0.00948087	RBM41	RNA binding motif protein 41	403.852	0.931111	ENSG00000089682
-0.936082	BIRC5	baculoviral IAP repeat containing 5	1693.04	1.96365e-95	ENSG00000089685
-0.0618757	LAG3	lymphocyte activating 3	10.3384	0.926307	ENSG00000089692
-0.420103	MLF2	myeloid leukemia factor 2	1895.63	1.37122e-18	ENSG00000089693
0.111859	OTUB2	OTU deubiquitinase, ubiquitin aldehyde binding 2	109.607	0.555354	ENSG00000089723
0.941661	DDX24	DEAD-box helicase 24	3711.55	2.47313e-160	ENSG00000089737
-0.43916	ZBTB25	zinc finger and BTB domain containing 25	498.029	3.85972e-08	ENSG00000089775
0.451634	NECAP1	NECAP endocytosis associated 1	530.715	1.27879e-08	ENSG00000089818
-0.956684	ARHGAP4	Rho GTPase activating protein 4	32.7879	0.00284143	ENSG00000089820
0.218169	ANKRD24	ankyrin repeat domain 24	67.528	0.347345	ENSG00000089847
0.085622	DHX32	DEAH-box helicase 32 (putative)	1002.57	0.193002	ENSG00000089876
0.24516	RCOR1	REST corepressor 1	1221.55	4.77875e-06	ENSG00000089902
1.33879	GPATCH2L	G-patch domain containing 2 like	1429.68	1.5438e-145	ENSG00000089916
-0.562421	LTBP4	latent transforming growth factor beta binding protein 4	2050.22	1.30825e-38	ENSG00000090006
0.229567	BLVRB	biliverdin reductase B	2069.38	8.26139e-08	ENSG00000090013
0.528772	SLC9A1	solute carrier family 9 member A1	2714.67	3.56524e-43	ENSG00000090020
0.866382	SPTLC1	serine palmitoyltransferase long chain base subunit 1	2216.13	1.64989e-88	ENSG00000090054
-0.010224	PAPOLA	poly(A) polymerase alpha	5376.89	0.779345	ENSG00000090060
0.921781	CCNK	cyclin K	1550.66	6.66554e-78	ENSG00000090061
-0.613733	PCBP4	poly(rC) binding protein 4	592.643	2.55957e-16	ENSG00000090097
1.16298	RGS1	regulator of G protein signaling 1	64.479	3.02242e-07	ENSG00000090104
-0.693971	YPEL3	yippee like 3	267.669	1.07558e-09	ENSG00000090238
-0.350705	MRPS33	mitochondrial ribosomal protein S33	1453.65	1.54973e-11	ENSG00000090263
0.00566308	NDUFB2	NADH:ubiquinone oxidoreductase subunit B2	2118.43	0.90999	ENSG00000090266
0.113311	NUDC	nuclear distribution C, dynein complex regulator	3481.71	0.0014683	ENSG00000090273
0.584396	MAEA	macrophage erythroblast attacher	1393.77	4.3693e-33	ENSG00000090316
-0.51379	ICAM1	intercellular adhesion molecule 1	42.6238	0.0702006	ENSG00000090339
0.690209	STRN4	striatin 4	2882.26	8.28854e-81	ENSG00000090372
-0.53706	IRAK3	interleukin 1 receptor associated kinase 3	2.65231	0.670106	ENSG00000090376
0.683203	LYZ	lysozyme	25.1176	0.0663669	ENSG00000090382
0.829089	MUL1	mitochondrial E3 ubiquitin protein ligase 1	1562.86	1.00825e-66	ENSG00000090432
-0.83724	TFAP4	transcription factor AP-4	161.021	3.32388e-09	ENSG00000090447
0.210472	PDCD7	programmed cell death 7	1409.83	2.04441e-05	ENSG00000090470
-0.745286	SPG21	SPG21, maspardin	4198.02	7.12326e-121	ENSG00000090487
-0.20736	DNAJB11	DnaJ heat shock protein family (Hsp40) member B11	2753.26	9.96224e-08	ENSG00000090520
1.41953	P3H2	prolyl 3-hydroxylase 2	1137.66	1.9477e-134	ENSG00000090530
-0.221122	CHRD	chordin	12.0012	0.700518	ENSG00000090539
-0.367076	FLT3LG	fms related tyrosine kinase 3 ligand	69.8902	0.096097	ENSG00000090554
-0.158895	RAB11FIP3	RAB11 family interacting protein 3	1418.85	0.00253176	ENSG00000090565
-0.0668162	GNPTG	N-acetylglucosamine-1-phosphate transferase gamma subunit	979.753	0.296353	ENSG00000090581
0.803748	ZNF268	zinc finger protein 268	659.244	1.07098e-30	ENSG00000090612
0.12097	GOLGA3	golgin A3	3623.48	0.00256302	ENSG00000090615
0.455421	PABPC4	poly(A) binding protein cytoplasmic 4	5057.21	8.27214e-47	ENSG00000090621
0.0379946	CERS4	ceramide synthase 4	164.18	0.814659	ENSG00000090661
0.470869	MCOLN1	mucolipin 1	746.678	1.48461e-12	ENSG00000090674
-0.186991	USP48	ubiquitin specific peptidase 48	1865.15	2.86684e-05	ENSG00000090686
0.957202	EFNB1	ephrin B1	188.519	1.29314e-12	ENSG00000090776
0.580787	PDPR	pyruvate dehydrogenase phosphatase regulatory subunit	1661.55	2.35151e-29	ENSG00000090857
0.9352	AARS	alanyl-tRNA synthetase	5315.49	4.40147e-213	ENSG00000090861
-0.140132	GLG1	golgi glycoprotein 1	3401.1	5.43087e-05	ENSG00000090863
-0.681888	KIF4A	kinesin family member 4A	1541.36	1.42417e-47	ENSG00000090889
-0.201983	TNRC6A	trinucleotide repeat containing 6A	2306.09	4.4353e-07	ENSG00000090905
-1.17889	PLEKHG2	pleckstrin homology and RhoGEF domain containing G2	415.431	8.08197e-37	ENSG00000090924
-1.06566	DLL3	delta like canonical Notch ligand 3	107.889	2.21994e-09	ENSG00000090932
-0.916374	NAT14	N-acetyltransferase 14 (putative)	362.722	3.35028e-22	ENSG00000090971
-0.224032	PITPNM2	phosphatidylinositol transfer protein membrane associated 2	382.295	0.0170361	ENSG00000090975
-0.209984	EXOC1	exocyst complex component 1	2301.01	6.32902e-07	ENSG00000090989
0.864244	RBM27	RNA binding motif protein 27	1859.71	5.96281e-86	ENSG00000091009
1.26223	POU4F3	POU class 4 homeobox 3	2.91808	0.29339	ENSG00000091010
0.324991	OSBPL8	oxysterol binding protein like 8	2932.82	1.18603e-19	ENSG00000091039
0.312853	DTX2	deltex E3 ubiquitin ligase 2	304.293	0.00232309	ENSG00000091073
1.28466	NLRC4	NLR family CARD domain containing 4	27.474	0.000346317	ENSG00000091106
0.301325	PUS7	pseudouridylate synthase 7 (putative)	1114.61	3.15029e-07	ENSG00000091127
-0.414489	LAMB4	laminin subunit beta 4	1.79763	0.7947	ENSG00000091128
3.44114	NRCAM	neuronal cell adhesion molecule	8.25716	0.000134076	ENSG00000091129
-0.65352	LAMB1	laminin subunit beta 1	4391.04	2.90987e-95	ENSG00000091136
-1.02754	SLC26A4	solute carrier family 26 member 4	8.0844	0.123052	ENSG00000091137
1.27472	SLC26A3	solute carrier family 26 member 3	1.79921	0.39086	ENSG00000091138
-0.436732	DLD	dihydrolipoamide dehydrogenase	2926.15	1.67637e-27	ENSG00000091140
0.758602	WDR7	WD repeat domain 7	942.515	2.04752e-35	ENSG00000091157
0.00136974	TXNL1	thioredoxin like 1	2781.26	0.976884	ENSG00000091164
-1.7818	IL5RA	interleukin 5 receptor subunit alpha	8.31754	0.0100337	ENSG00000091181
-0.662407	ABCC6	ATP binding cassette subfamily C member 6	12.241	0.236516	ENSG00000091262
-0.662407	LOC105369239	multidrug resistance-associated protein 6	12.241	0.236516	ENSG00000091262
-0.575419	CMTM6	CKLF like MARVEL transmembrane domain containing 6	2363.12	2.73428e-49	ENSG00000091317
-0.852656	ITGA6	integrin subunit alpha 6	6788.16	3.36726e-123	ENSG00000091409
-0.887228	RAPGEF4	Rap guanine nucleotide exchange factor 4	19.1547	0.044943	ENSG00000091428
-0.541508	MAP3K20	mitogen-activated protein kinase kinase kinase 20	3366.25	1.73932e-52	ENSG00000091436
0.291967	SMPX	small muscle protein, X-linked	27.1619	0.433535	ENSG00000091482
0.184956	FH	fumarate hydratase	1455.2	0.000493145	ENSG00000091483
2.43926	SEL1L3	SEL1L family member 3	13.4725	2.50905e-05	ENSG00000091490
0.512309	TF	transferrin	12.3038	0.349298	ENSG00000091513
-0.0372133	CDV3	CDV3 homolog	7273.98	0.208978	ENSG00000091527
-0.0954436	MYO15A	myosin XVA	26.0096	0.815569	ENSG00000091536
-0.151038	ALKBH5	alkB homolog 5, RNA demethylase	1832.04	0.000683524	ENSG00000091542
0.320717	NLRP1	NLR family pyrin domain containing 1	21.131	0.449906	ENSG00000091592
-1.52572	PITPNM3	PITPNM family member 3	252.475	9.64547e-40	ENSG00000091622
-0.655697	SPAG7	sperm associated antigen 7	266.944	2.65604e-09	ENSG00000091640
0.898454	ORC6	origin recognition complex subunit 6	1657.21	1.91345e-85	ENSG00000091651
-0.0581587	ZFHX4	zinc finger homeobox 4	1016.25	0.348705	ENSG00000091656
0.575159	ZC3HC1	zinc finger C3HC-type containing 1	1062.02	4.18596e-25	ENSG00000091732
1.22922	ESR1	estrogen receptor 1	30.4253	0.000414452	ENSG00000091831
0.522302	RGS17	regulator of G protein signaling 17	38.5988	0.0851	ENSG00000091844
-0.382444	ANGPT2	angiopoietin 2	6.13382	0.632895	ENSG00000091879
0.0838873	TMEM101	transmembrane protein 101	668.26	0.291398	ENSG00000091947
-1.09348	CCDC80	coiled-coil domain containing 80	23941.6	0	ENSG00000091986
-0.602003	PSME1	proteasome activator subunit 1	1804.33	8.42648e-41	ENSG00000092010
0.53026	PPP2R3C	protein phosphatase 2 regulatory subunit B''gamma	496.042	2.59444e-10	ENSG00000092020
-1.05967	HAUS4	HAUS augmin like complex subunit 4	280.945	2.33669e-23	ENSG00000092036
-0.290056	JPH4	junctophilin 4	6.40758	0.718018	ENSG00000092051
2.80706	SLC7A8	solute carrier family 7 member 8	138.222	1.26361e-49	ENSG00000092068
-0.34255	OSGEP	O-sialoglycoprotein endopeptidase	697.99	4.27267e-07	ENSG00000092094
-0.418066	SLC22A17	solute carrier family 22 member 17	81.3025	0.0544974	ENSG00000092096
-0.439124	RNF31	ring finger protein 31	660.253	3.23505e-10	ENSG00000092098
0.871808	SCFD1	sec1 family domain containing 1	1714.24	1.03289e-76	ENSG00000092108
-0.126846	G2E3	G2/M-phase specific E3 ubiquitin protein ligase	1177.72	0.0213935	ENSG00000092140
0.285191	HECTD1	HECT domain E3 ubiquitin protein ligase 1	3728.88	7.08473e-18	ENSG00000092148
0.559417	HNRNPC	heterogeneous nuclear ribonucleoprotein C (C1/C2)	12464.3	8.90036e-125	ENSG00000092199
0.583881	RPGRIP1	RPGR interacting protein 1	10.4519	0.325047	ENSG00000092200
-0.285534	SUPT16H	SPT16 homolog, facilitates chromatin remodeling subunit	4825.36	2.02037e-20	ENSG00000092201
0.877708	TOX4	TOX high mobility group box family member 4	2190.71	4.70772e-91	ENSG00000092203
-0.128161	GEMIN2	gem nuclear organelle associated protein 2	356.598	0.20551	ENSG00000092208
-1.92771	TGM1	transglutaminase 1	380.92	5.13376e-85	ENSG00000092295
-0.7472	TINF2	TERF1 interacting nuclear factor 2	814.934	6.19536e-29	ENSG00000092330
0.0541707	SEMA6A	semaphorin 6A	148.428	0.768588	ENSG00000092421
0.755537	TRPM7	transient receptor potential cation channel subfamily M member 7	5111.22	1.17865e-135	ENSG00000092439
0.26689	TYRO3	TYRO3 protein tyrosine kinase	1318.86	7.60783e-07	ENSG00000092445
-0.728863	WDR76	WD repeat domain 76	1110.65	1.83016e-40	ENSG00000092470
0.674355	CAPN3	calpain 3	33.6296	0.0395891	ENSG00000092529
-0.944106	SNAP23	synaptosome associated protein 23	2214.42	1.56235e-112	ENSG00000092531
1.93006	PHGDH	phosphoglycerate dehydrogenase	480.699	7.62019e-104	ENSG00000092621
-0.991103	COL9A3	collagen type IX alpha 3 chain	2793.59	8.55919e-106	ENSG00000092758
0.460812	EZR	ezrin	8266.27	1.09165e-64	ENSG00000092820
-0.583263	MYL6	myosin light chain 6	17458.8	1.35739e-112	ENSG00000092841
-0.718612	AGO1	argonaute 1, RISC catalytic component	996.084	9.55223e-36	ENSG00000092847
0.135304	TEKT2	tektin 2	1.83338	0.928718	ENSG00000092850
-0.331604	CLSPN	claspin	1169.09	2.10735e-09	ENSG00000092853
-0.168806	RFFL	ring finger and FYVE like domain containing E3 ubiquitin protein ligase	485.051	0.0517869	ENSG00000092871
1.09696	UNC13D	unc-13 homolog D	49.2729	3.37529e-05	ENSG00000092929
0.0141849	MFSD11	major facilitator superfamily domain containing 11	894.147	0.840718	ENSG00000092931
-1.02348	DPYSL2	dihydropyrimidinase like 2	7675.51	4.21895e-284	ENSG00000092964
1.41498	TGFB2	transforming growth factor beta 2	1664.15	9.33662e-167	ENSG00000092969
1.16511	GPATCH2	G-patch domain containing 2	1192.41	1.49309e-102	ENSG00000092978
-0.18111	NUP50	nucleoporin 50	1015.48	0.00205859	ENSG00000093000
-0.595896	CDC45	cell division cycle 45	473.833	4.43502e-13	ENSG00000093009
-0.0368445	COMT	catechol-O-methyltransferase	614.363	0.654223	ENSG00000093010
-0.668024	ADA2	adenosine deaminase 2	3.70537	0.509348	ENSG00000093072
-0.324538	ECHDC1	ethylmalonyl-CoA decarboxylase 1	1312.08	1.13275e-09	ENSG00000093144
-0.126854	LRRFIP2	LRR binding FLII interacting protein 2	2416.72	0.00227209	ENSG00000093167
-0.265342	SEC22C	SEC22 homolog C, vesicle trafficking protein	1967.33	2.51522e-09	ENSG00000093183
-0.901298	XYLB	xylulokinase	735.441	1.60227e-41	ENSG00000093217
-0.824221	HDAC6	histone deacetylase 6	732.531	4.26557e-32	ENSG00000094631
0.531546	CDC6	cell division cycle 6	2259.61	2.16687e-38	ENSG00000094804
0.734056	UPRT	uracil phosphoribosyltransferase homolog	416.662	6.17508e-14	ENSG00000094841
0.669451	CDC23	cell division cycle 23	2090.15	5.4336e-56	ENSG00000094880
-0.195089	AAAS	aladin WD repeat nucleoporin	876.547	0.00435949	ENSG00000094914
-0.639538	CBX5	chromobox 5	2911.66	1.72715e-64	ENSG00000094916
0.973802	SUCO	SUN domain containing ossification factor	1443.72	2.56105e-81	ENSG00000094975
-0.391421	MSH2	mutS homolog 2	1647.78	3.02191e-16	ENSG00000095002
0.807669	MAP3K1	mitogen-activated protein kinase kinase kinase 1	280.773	4.32711e-14	ENSG00000095015
-0.821914	DHPS	deoxyhypusine synthase	1111.06	5.93036e-47	ENSG00000095059
-0.134925	HOOK2	hook microtubule tethering protein 2	508.508	0.130915	ENSG00000095066
0.652734	ARCN1	archain 1	8505.61	7.6405e-136	ENSG00000095139
-0.50585	EPB41L4B	erythrocyte membrane protein band 4.1 like 4B	299.062	1.79016e-06	ENSG00000095203
1.38829	TMEM38B	transmembrane protein 38B	1515.39	5.71795e-159	ENSG00000095209
-0.132005	PSMD5	proteasome 26S subunit, non-ATPase 5	929.566	0.0378609	ENSG00000095261
1.2225	PTGS1	prostaglandin-endoperoxide synthase 1	4.07976	0.211494	ENSG00000095303
0.273019	NUP188	nucleoporin 188	2350.54	4.73584e-11	ENSG00000095319
-0.998944	CRAT	carnitine O-acetyltransferase	1015.2	5.82147e-66	ENSG00000095321
-0.164119	SH2D3C	SH2 domain containing 3C	10.8795	0.791802	ENSG00000095370
0.439411	NANS	N-acetylneuraminate synthase	2011.46	4.11526e-25	ENSG00000095380
0.778323	TBC1D2	TBC1 domain family member 2	518.657	6.07025e-22	ENSG00000095383
2.13679	WHRN	whirlin	927.02	2.11017e-219	ENSG00000095397
0.760499	PDE6C	phosphodiesterase 6C	9.46744	0.265607	ENSG00000095464
1.02335	CWF19L1	CWF19 like 1, cell cycle control (S. pombe)	1505.26	1.86753e-94	ENSG00000095485
-0.357074	SEMA4G	semaphorin 4G	80.2314	0.0892214	ENSG00000095539
0.833341	BTAF1	B-TFIID TATA-box binding protein associated factor 1	3048.75	4.71349e-106	ENSG00000095564
1.08555	IKZF5	IKAROS family zinc finger 5	740.065	1.46245e-57	ENSG00000095574
0.881854	TLL2	tolloid like 2	7.44412	0.213289	ENSG00000095587
0.346241	CYP26A1	cytochrome P450 family 26 subfamily A member 1	2.71841	0.78648	ENSG00000095596
1.42849	SORBS1	sorbin and SH3 domain containing 1	145.455	2.31139e-19	ENSG00000095637
1.23828	CRTAC1	cartilage acidic protein 1	5.8854	0.123944	ENSG00000095713
1.7322	BAMBI	BMP and activin membrane bound inhibitor	86.0247	2.44234e-16	ENSG00000095739
0.787642	IL11	interleukin 11	15.0857	0.115059	ENSG00000095752
-0.145307	MYO3A	myosin IIIA	71.8223	0.556051	ENSG00000095777
0.609096	WAC	WW domain containing adaptor with coiled-coil	2639.1	2.26906e-52	ENSG00000095787
0.607455	CREM	cAMP responsive element modulator	307.349	3.23762e-09	ENSG00000095794
-0.0221325	NUBP2	nucleotide binding protein 2	1108.77	0.72827	ENSG00000095906
0.122764	HIVEP1	human immunodeficiency virus type I enhancer binding protein 1	963.931	0.0451196	ENSG00000095951
0.0532751	FKBP5	FK506 binding protein 5	516.559	0.550723	ENSG00000096060
0.452483	SRPK1	SRSF protein kinase 1	2140.9	2.01477e-27	ENSG00000096063
1.24157	BRPF3	bromodomain and PHD finger containing 3	1103.32	7.22852e-99	ENSG00000096070
0.899895	MRPS18A	mitochondrial ribosomal protein S18A	349.156	1.83276e-20	ENSG00000096080
-0.530014	TMEM14A	transmembrane protein 14A	909.102	3.04241e-18	ENSG00000096092
-0.033409	EFHC1	EF-hand domain containing 1	704.18	0.690636	ENSG00000096093
0.035254	HSP90AB1	heat shock protein 90 alpha family class B member 1	31424.5	0.123491	ENSG00000096384
1.12019	CDC5L	cell division cycle 5 like	3755.97	2.52165e-190	ENSG00000096401
-0.0096197	ITPR3	inositol 1,4,5-trisphosphate receptor type 3	3089.2	0.821961	ENSG00000096433
0.321147	ZNF184	zinc finger protein 184	257.489	0.00467404	ENSG00000096654
3.43122	DSP	desmoplakin	16.477	4.80086e-08	ENSG00000096696
1.33344	SIRT1	sirtuin 1	832.987	7.96549e-95	ENSG00000096717
0.33611	HNRNPH3	heterogeneous nuclear ribonucleoprotein H3	3367.63	1.50757e-22	ENSG00000096746
0.347547	IFT74	intraflagellar transport 74	277.54	0.00236539	ENSG00000096872
0.523905	JAK2	Janus kinase 2	195.913	4.97166e-05	ENSG00000096968
0.335142	ABL1	ABL proto-oncogene 1, non-receptor tyrosine kinase	2029	2.83111e-12	ENSG00000097007
-0.234506	ACOT7	acyl-CoA thioesterase 7	1406.78	5.36853e-06	ENSG00000097021
-0.188338	SH3GLB1	SH3 domain containing GRB2 like, endophilin B1	3812.95	6.53798e-08	ENSG00000097033
-0.643969	CDC7	cell division cycle 7	826.566	8.32764e-24	ENSG00000097046
0.91401	SYDE2	synapse defective Rho GTPase homolog 2	107.186	1.30231e-07	ENSG00000097096
0.818005	PCSK5	proprotein convertase subtilisin/kexin type 5	392.78	2.74577e-18	ENSG00000099139
-0.238557	SCD	stearoyl-CoA desaturase	6752.56	0.000158552	ENSG00000099194
0.239562	TMED1	transmembrane p24 trafficking protein 1	451.737	0.0053056	ENSG00000099203
-0.682482	ABLIM1	actin binding LIM protein 1	2818.92	3.63342e-68	ENSG00000099204
-0.163473	ERMP1	endoplasmic reticulum metallopeptidase 1	237.842	0.198788	ENSG00000099219
0.621434	RAB18	RAB18, member RAS oncogene family	2319.65	7.59285e-53	ENSG00000099246
-1.34179	NRP1	neuropilin 1	829.636	1.26314e-94	ENSG00000099250
-2.00606	PRTFDC1	phosphoribosyl transferase domain containing 1	124.947	6.70323e-31	ENSG00000099256
-1.27574	PALMD	palmdelphin	5.40467	0.126194	ENSG00000099260
-0.935646	TSPAN15	tetraspanin 15	82.5714	3.02138e-06	ENSG00000099282
0.007407	H2AFY2	H2A histone family member Y2	13.6704	0.989589	ENSG00000099284
1.59712	WASHC2A	WASH complex subunit 2A	280.311	9.81754e-45	ENSG00000099290
-0.41044	MAST3	microtubule associated serine/threonine kinase 3	350.268	2.24286e-05	ENSG00000099308
0.642048	MZF1	myeloid zinc finger 1	379.343	2.53608e-11	ENSG00000099326
-0.195215	OCEL1	occludin/ELL domain containing 1	205.368	0.13224	ENSG00000099330
-1.00626	MYO9B	myosin IXB	3393.76	1.02549e-186	ENSG00000099331
-0.282069	KCNK6	potassium two pore domain channel subfamily K member 6	122.36	0.112371	ENSG00000099337
3.57886	CATSPERG	cation channel sperm associated auxiliary subunit gamma	189.94	7.15553e-81	ENSG00000099338
0.498663	PSMD8	proteasome 26S subunit, non-ATPase 8	7631.32	3.48282e-76	ENSG00000099341
-0.623011	FBXL19	F-box and leucine rich repeat protein 19	542.936	9.35412e-15	ENSG00000099364
-1.15137	STX1B	syntaxin 1B	30.391	0.000547248	ENSG00000099365
-0.279513	HSD3B7	hydroxy-delta-5-steroid dehydrogenase, 3 beta- and steroid delta-isomerase 7	282.82	0.00889929	ENSG00000099377
0.272546	SETD1A	SET domain containing 1A	848.323	2.03193e-05	ENSG00000099381
-0.667089	BCL7C	BCL tumor suppressor 7C	1227.52	1.5274e-36	ENSG00000099385
1.62498	EFNA2	ephrin A2	8.54319	0.0159842	ENSG00000099617
-0.111474	CIRBP	cold inducible RNA binding protein	4295.73	0.00214356	ENSG00000099622
-0.776909	ATP5F1D	ATP synthase F1 subunit delta	762.274	7.52607e-31	ENSG00000099624
0.32343	CBARP	CACN beta subunit associated regulatory protein	220.822	0.00901728	ENSG00000099625
2.00805	IGFALS	insulin like growth factor binding protein acid labile subunit	1.81343	0.458945	ENSG00000099769
-0.214249	HNRNPM	heterogeneous nuclear ribonucleoprotein M	5735.45	1.70609e-11	ENSG00000099783
-0.808106	2002-03-01	membrane associated ring-CH-type finger 2	545.16	2.53007e-26	ENSG00000099785
-0.561879	NDUFB7	NADH:ubiquinone oxidoreductase subunit B7	1419.08	3.32625e-28	ENSG00000099795
-0.227367	TECR	trans-2,3-enoyl-CoA reductase	1291.55	2.7474e-05	ENSG00000099797
-0.268477	TIMM13	translocase of inner mitochondrial membrane 13	1416.09	4.50585e-07	ENSG00000099800
0.474248	CDC34	cell division cycle 34	1445.83	3.5791e-22	ENSG00000099804
0.504445	MISP	mitotic spindle positioning	41.7752	0.0781009	ENSG00000099812
-0.0952295	CEP170B	centrosomal protein 170B	1500.95	0.063879	ENSG00000099814
-0.0865665	POLR2E	RNA polymerase II subunit E	2352.1	0.0336596	ENSG00000099817
-0.270341	POLRMT	RNA polymerase mitochondrial	633.154	0.000301486	ENSG00000099821
-0.166361	HCN2	hyperpolarization activated cyclic nucleotide gated potassium and sodium channel 2	790.671	0.0135815	ENSG00000099822
1.40154	CDHR5	cadherin related family member 5	6.3654	0.0761937	ENSG00000099834
-0.231982	IZUMO4	IZUMO family member 4	13.2559	0.675749	ENSG00000099840
-0.579749	RASSF7	Ras association domain family member 7	747.459	5.59189e-19	ENSG00000099849
0.564579	GADD45B	growth arrest and DNA damage inducible beta	2693.31	2.89836e-36	ENSG00000099860
-0.854487	PALM	paralemmin	144.576	4.85756e-08	ENSG00000099864
-0.128966	MADCAM1	mucosal vascular addressin cell adhesion molecule 1	20.7127	0.772962	ENSG00000099866
1.44041	MKNK2	MAP kinase interacting serine/threonine kinase 2	4120.26	0	ENSG00000099875
-0.79776	ARVCF	ARVCF, delta catenin family member	87.6755	3.7121e-05	ENSG00000099889
-0.6804	TRMT2A	tRNA methyltransferase 2 homolog A	326.864	7.63377e-12	ENSG00000099899
-0.285513	RANBP1	RAN binding protein 1	2255.09	5.46747e-13	ENSG00000099901
-0.306388	ZDHHC8	zinc finger DHHC-type containing 8	619.102	8.14062e-05	ENSG00000099904
-0.62361	KLHL22	kelch like family member 22	301.156	5.48618e-09	ENSG00000099910
0.260378	MED15	mediator complex subunit 15	1015.67	1.28012e-05	ENSG00000099917
0.170004	SNAP29	synaptosome associated protein 29	818.191	0.00915368	ENSG00000099940
0.311167	CRKL	CRK like proto-oncogene, adaptor protein	1126.14	2.86921e-08	ENSG00000099942
-0.893355	LZTR1	leucine zipper like transcription regulator 1	580.937	6.9901e-34	ENSG00000099949
-2.14012	MMP11	matrix metallopeptidase 11	1.74707	0.197708	ENSG00000099953
-0.350472	SMARCB1	SWI/SNF related, matrix associated, actin dependent regulator of chromatin, subfamily b, member 1	539.068	1.01158e-05	ENSG00000099956
-1.0987	P2RX6	purinergic receptor P2X 6	14.4279	0.0281721	ENSG00000099957
-1.56318	DERL3	derlin 3	12.9892	0.00332567	ENSG00000099958
-0.115788	BCL2L13	BCL2 like 13	1098.73	0.0577454	ENSG00000099968
-0.0189252	DDTL	D-dopachrome tautomerase like	31.5273	0.959707	ENSG00000099974
0.486954	DDT	D-dopachrome tautomerase	199.597	0.000119063	ENSG00000099977
0.486954	DDTL	D-dopachrome tautomerase like	199.597	0.000119063	ENSG00000099977
-0.636849	GSTT2	glutathione S-transferase theta 2 (gene/pseudogene)	7.74596	0.383224	ENSG00000099984
0.201273	CABIN1	calcineurin binding protein 1	588.48	0.00927601	ENSG00000099991
-0.0751146	TBC1D10A	TBC1 domain family member 10A	114.235	0.697294	ENSG00000099992
1.14067	SUSD2	sushi domain containing 2	6.67108	0.14671	ENSG00000099994
0.794656	SF3A1	splicing factor 3a subunit 1	1855.77	1.82364e-69	ENSG00000099995
-0.778756	RNF215	ring finger protein 215	151.059	7.18781e-08	ENSG00000099999
-0.0770724	SEC14L2	SEC14 like lipid binding 2	165.824	0.620891	ENSG00000100003
-1.57353	SPECC1L	sperm antigen with calponin homology and coiled-coil domains 1 like	1815.41	2.67235e-261	ENSG00000100014
-0.430319	PPIL2	peptidylprolyl isomerase like 2	367.128	3.92754e-06	ENSG00000100023
1.12947	YPEL1	yippee like 1	27.4359	0.0015546	ENSG00000100027
0.0395311	SNRPD3	small nuclear ribonucleoprotein D3 polypeptide	1534.44	0.477583	ENSG00000100028
1.14069	PES1	pescadillo ribosomal biogenesis factor 1	2003.13	3.06548e-146	ENSG00000100029
0.14	MAPK1	mitogen-activated protein kinase 1	2543.65	0.000886054	ENSG00000100030
1.18131	GGT1	gamma-glutamyltransferase 1	20.543	0.00855379	ENSG00000100031
-0.729345	PRODH	proline dehydrogenase 1	5.94148	0.364034	ENSG00000100033
-0.668411	PPM1F	protein phosphatase, Mg2+/Mn2+ dependent 1F	844.819	6.2966e-26	ENSG00000100034
-0.00126886	SLC35E4	solute carrier family 35 member E4	203.81	0.993338	ENSG00000100036
0.580843	TOP3B	DNA topoisomerase III beta	300.514	1.54694e-08	ENSG00000100038
1.41551	CRYBB3	crystallin beta B3	1.93614	0.334897	ENSG00000100053
0.230066	ESS2	ess-2 splicing factor homolog	291.245	0.0390349	ENSG00000100056
1.3064	CARD10	caspase recruitment domain family member 10	9.09294	0.0425473	ENSG00000100065
0.112607	LRP5L	LDL receptor related protein 5 like	48.0883	0.697846	ENSG00000100068
-0.605614	SLC25A1	solute carrier family 25 member 1	896.227	1.26793e-21	ENSG00000100075
-0.0564134	GRK3	G protein-coupled receptor kinase 3	21.3106	0.89871	ENSG00000100077
0.0344501	GGA1	golgi associated, gamma adaptin ear containing, ARF binding protein 1	482.936	0.714948	ENSG00000100083
0.0384482	HIRA	histone cell cycle regulator	578.738	0.654314	ENSG00000100084
-0.963723	SH3BP1	SH3 domain binding protein 1	103.747	7.1627e-08	ENSG00000100092
-0.0667914	LGALS1	galectin 1	8934.88	0.0215594	ENSG00000100097
-0.205946	HPS4	HPS4, biogenesis of lysosomal organelles complex 3 subunit 2	976.878	0.000481577	ENSG00000100099
0.146596	PIK3IP1	phosphoinositide-3-kinase interacting protein 1	33.5242	0.66917	ENSG00000100100
-0.156062	SRRD	SRR1 domain containing	335.73	0.129853	ENSG00000100104
-0.326608	PATZ1	POZ/BTB and AT hook containing zinc finger 1	326.975	0.00110959	ENSG00000100105
-0.885484	TRIOBP	TRIO and F-actin binding protein	845.538	1.97567e-46	ENSG00000100106
0.933547	TFIP11	tuftelin interacting protein 11	648.225	1.22849e-37	ENSG00000100109
-0.634225	GCAT	glycine C-acetyltransferase	163.333	5.41983e-06	ENSG00000100116
0.0669083	ANKRD54	ankyrin repeat domain 54	396.691	0.530755	ENSG00000100124
0.301494	EIF3L	eukaryotic translation initiation factor 3 subunit L	2801.68	9.85715e-13	ENSG00000100129
0.380209	SNU13	small nuclear ribonucleoprotein 13	1609.53	1.12152e-14	ENSG00000100138
0.466056	MICALL1	MICAL like 1	717.132	2.96157e-12	ENSG00000100139
0.568531	POLR2F	RNA polymerase II subunit F	669.521	8.02651e-16	ENSG00000100142
-0.620096	CCDC134	coiled-coil domain containing 134	44.4533	0.0251922	ENSG00000100147
-0.0774072	DEPDC5	DEP domain containing 5	147.415	0.653801	ENSG00000100150
-0.0393136	PICK1	protein interacting with PRKCA 1	309.158	0.737107	ENSG00000100151
-0.364308	TTC28	tetratricopeptide repeat domain 28	303.177	0.000598629	ENSG00000100154
1.22757	SLC16A8	solute carrier family 16 member 8	4.0953	0.212095	ENSG00000100156
-0.257116	CENPM	centromere protein M	209.23	0.0438727	ENSG00000100162
1.08924	2003-09-01	septin 3	28.9074	0.00137588	ENSG00000100167
-0.879603	KDELR3	KDEL endoplasmic reticulum protein retention receptor 3	568.473	1.04185e-28	ENSG00000100196
0.19333	CYP2D6	cytochrome P450 family 2 subfamily D member 6	2.95365	0.872522	ENSG00000100197
0.19333	LOC107987478	cytochrome P450 2D6-like	2.95365	0.872522	ENSG00000100197
0.19333	LOC107987479	cytochrome P450 2D6	2.95365	0.872522	ENSG00000100197
-0.143789	DDX17	DEAD-box helicase 17	5433.04	2.74543e-06	ENSG00000100201
-0.775583	DMC1	DNA meiotic recombinase 1	4.64942	0.389898	ENSG00000100206
0.330087	TCF20	transcription factor 20	562.898	4.3815e-05	ENSG00000100207
0.103989	HSCB	HscB mitochondrial iron-sulfur cluster cochaperone	245.283	0.413907	ENSG00000100209
-0.347698	CBY1	chibby family member 1, beta catenin antagonist	267.793	0.00140525	ENSG00000100211
-0.45717	TOMM22	translocase of outer mitochondrial membrane 22	814.837	1.14712e-12	ENSG00000100216
0.464325	RSPH14	radial spoke head 14 homolog	1.64808	0.773736	ENSG00000100218
0.68509	XBP1	X-box binding protein 1	1620.29	2.52518e-47	ENSG00000100219
0.297032	RTCB	RNA 2',3'-cyclic phosphate and 5'-OH ligase	1324.02	7.25588e-09	ENSG00000100220
0.229442	JOSD1	Josephin domain containing 1	1736.52	3.50605e-06	ENSG00000100221
0.247682	FBXO7	F-box protein 7	1582.12	1.56613e-07	ENSG00000100225
0.570391	GTPBP1	GTP binding protein 1	504.615	1.95632e-12	ENSG00000100226
0.646058	POLDIP3	DNA polymerase delta interacting protein 3	1150.72	1.76267e-32	ENSG00000100227
0.159025	RAB36	RAB36, member RAS oncogene family	108.833	0.389441	ENSG00000100228
0.542563	TIMP3	TIMP metallopeptidase inhibitor 3	4907.76	5.87606e-62	ENSG00000100234
[truncated: 13,150 more rows]

## Sheet: results_UCH1kdoba67vsdmso
log2FoldChange	SYMBOL	GENENAME	baseMean	padj	Row.names
-0.279739	TSPAN6	tetraspanin 6	705.104	0.000854088	ENSG00000000003
-0.0642988	DPM1	dolichyl-phosphate mannosyltransferase subunit 1, catalytic	2439.62	0.280053	ENSG00000000419
-0.111198	SCYL3	SCY1 like pseudokinase 3	248.393	0.446799	ENSG00000000457
-0.0800648	C1orf112	chromosome 1 open reading frame 112	434.245	0.513362	ENSG00000000460
-0.863514	FGR	FGR proto-oncogene, Src family tyrosine kinase	10.1016	0.239536	ENSG00000000938
-0.580383	CFH	complement factor H	3857.94	8.73482e-40	ENSG00000000971
-0.367479	FUCA2	alpha-L-fucosidase 2	1153.94	9.23259e-09	ENSG00000001036
0.726866	GCLC	glutamate-cysteine ligase catalytic subunit	1698.84	9.92122e-39	ENSG00000001084
-0.00743299	NFYA	nuclear transcription factor Y subunit alpha	1188.58	0.940791	ENSG00000001167
0.490737	STPG1	sperm tail PG-rich repeat containing 1	181.167	0.00121353	ENSG00000001460
0.289357	NIPAL3	NIPA like domain containing 3	1325.68	9.46743e-06	ENSG00000001461
-0.145226	LAS1L	LAS1 like, ribosome biogenesis factor	1193.43	0.0331572	ENSG00000001497
0.565688	ENPP4	ectonucleotide pyrophosphatase/phosphodiesterase 4	359.943	1.23048e-07	ENSG00000001561
0.102455	SEMA3F	semaphorin 3F	100.335	0.666312	ENSG00000001617
2.12572	CFTR	cystic fibrosis transmembrane conductance regulator	20.1644	1.16857e-05	ENSG00000001626
-0.06641	ANKIB1	ankyrin repeat and IBR domain containing 1	2191.9	0.308444	ENSG00000001629
-0.0681365	CYP51A1	cytochrome P450 family 51 subfamily A member 1	2095.33	0.239137	ENSG00000001630
-0.162456	KRIT1	KRIT1, ankyrin repeat containing	1733.4	0.0109906	ENSG00000001631
0.414244	RAD52	RAD52 homolog, DNA repair protein	223.818	0.00294944	ENSG00000002016
0.0526976	BAD	BCL2 associated agonist of cell death	1043.54	0.550026	ENSG00000002330
-0.642898	LAP3	leucine aminopeptidase 3	5493.5	7.7848e-61	ENSG00000002549
-0.185917	CD99	CD99 molecule (Xg blood group)	3698.08	0.386761	ENSG00000002586
-1.22841	HS3ST1	heparan sulfate-glucosamine 3-sulfotransferase 1	170.353	8.55903e-16	ENSG00000002587
0.101986	AOC1	amine oxidase, copper containing 1	4.38553	0.935349	ENSG00000002726
1.38529	WNT16	Wnt family member 16	3.79848	0.229061	ENSG00000002745
-0.50804	HECW1	HECT, C2 and WW domain containing E3 ubiquitin protein ligase 1	98.8197	0.0109168	ENSG00000002746
0.167063	MAD1L1	mitotic arrest deficient 1 like 1	641.942	0.0735	ENSG00000002822
0.0570677	LASP1	LIM and SH3 protein 1	8487.93	0.171017	ENSG00000002834
0.320279	SNX11	sorting nexin 11	1189.83	2.28202e-07	ENSG00000002919
0.2296	M6PR	mannose-6-phosphate receptor, cation dependent	2444.89	1.96842e-05	ENSG00000003056
-0.609282	KLHL13	kelch like family member 13	31.1558	0.115196	ENSG00000003096
0.6232	CYP26B1	cytochrome P450 family 26 subfamily B member 1	3.47165	0.629046	ENSG00000003137
[truncated: 15,225 more rows]

## Sheet: results_UMkdoba67vsdmso
log2FoldChange	SYMBOL	GENENAME	baseMean	padj	Row.names
[truncated: 14,766 more rows]

## Sheet: results_UCH7kdoba67vsdmso
log2FoldChange	SYMBOL	GENENAME	baseMean	padj	Row.names
[truncated: 15,282 more rows]

[truncated: 1 more sheets: results_MUGkdoba67vsdmso_2]
